# Supplementary material for: Expression Landscape of circRNAs in Arabidopsis thaliana Seedlings and Adult Tissues
Source: Front Plant Sci. 2020 Sep 10;11:576581. doi: 10.3389/fpls.2020.576581 (PMC7511659; doi:10.3389/fpls.2020.576581)
Supplement: Supplementary file 2 [file Table_1.xlsx]

## Sheet: Supplentary Table 1
Supplementary Table 1. The list of primers.
circRNA_ID	gene_id	strand	F_primer_name (CIRC)	F_primer_seq (CIRC)	F_TM	R_primer_name (CIRC)	R_primer_seq (CIRC)	R_TM	product size for CIRC F + R	R_LIN_primer_name (LIN)	R_primer_seq (LIN)	TM	product size for LIN F + R_lin
4:4196362-4197112	AT4G07390	+	F_AT4G07390	GAGAGTTTTCACCAGCTTACAGG	59.46	R_AT4G07390	CTTCGAAAAGCGTCGGATTA	60.34	100	R_lin_AT4G07390	TTGGCTTTCTTCTCCTTTGC	59.57	151
5:1106879-1107381	AT5G04090	-	F_AT5G04090	AGAACCGCGAATTTTTCAAG	59.34	R_AT5G04090	TGGAGGCATCGTTCAATTAG	58.72	191	R_lin_AT5G04090	TGGTTCCTTGCGTTCATAGA	59.27	200
1:382803-383130	AT1G02080	+	F_AT1G02080	AGACCGCAACTGACTTTGCT	60.06	R_AT1G02080	CTTTGTTGAGCTTCCGATCC	59.81	138	R_lin_AT1G02080	CAGAGAGGCCAGCTGTGTTA	59.19	189
2:19672192-19672380	AT2G48100	+	F_AT2G48100	GGAAGGCTTCTTCTTGTTGG	58.91	R_AT2G48100	GTGGCATACCATCCTTCAAA	58.42	130	R_lin_AT2G48100	TGAGGTACTTGAGCGATTGG	58.87	145
1:30349032-30349237	AT1G80750	+	F_AT1G80750	CCGGCAAGAAGAAGAAGAAA	59.56	R_AT1G80750	AAAGGCAAGCTCATCTCTGTTC	60.03	174	R_lin_AT1G80750	CCTTGAATGCGTATGATGAAA	58.64	169
2:14529841-14530023	AT2G34460	+	F_AT2G34460	TCAAAGCTGGTGTTCGTGAT	59.29	R_AT2G34460	AGTTGCTCCTGCGACAAAC	59.03	131	R_lin_AT2G34460	GACGAAACCCAGTAGCACAA	58.78	159
4:13026572-13027129	AT4G25500	+	F_AT4G25500	GTGGGTATGATGGTGCAGAG	58.96	R_AT4G25500	GCCTTCTCCTTTCAGGTGAC	58.87	150	R_lin_AT4G25500	TCAAAAACCAAACGACAAAAA	58.23	171
3:3172073-3172253	AT3G10260	-	F_AT3G10260	CTCGTTTGCTATGCCCTCTT	59.48	R_AT3G10260	TCCCATCAAAACACTTGCAG	59.69	130	R_lin_AT3G10260	TCCCTTTACAAGCCAAGTCC	59.17	196
2:16614068-16615133	AT2G39810	+	F_AT2G39810	TCTTTTTACATGGCGGTTCA	59.16	R_AT2G39810	CTACATATGCCAGCCACCTG	59.17	126	R_lin_AT2G39810	CAATGAATGCCTCGTTATGC	59.14	152
2:17272368-17272938	AT2G41440	+	F_AT2G41440	TGCTGACGGTATGAGGAGAG	58.98	R_AT2G41440	GGATCGGACATCCATAAGGT	58.67	133	R_lin_AT2G41440	TGCTTCACCATTTGGATCTT	58.15	91
1:3674466-3675958	AT1G11000	-	F_AT1G11000	AAGCGATCATAATGGCTGAA	58.34	R_AT1G11000	CGTTCAACGAGAAAGCAAAC	58.55	186	R_lin_AT1G11000	CGATTGTTACTCCAAGGATGAG	58.72	109
1:20310304-20310540	AT1G54410,	-	F_AT1G54410	AGGACAAGAAGGAGAAGAAA	58.37	R_AT1G54410	ATACCTTCTTTGTGCTCACC	59.35	144
4:2719063-2719462	AT4G05320,	+	F_AT4G05320	TGGAGGTGGAGAGTTCTG	58.69	R_AT4G05320	CTTCACGAAGATCTGCATAC	57.83	374
1:7085326-7088687	n/a	-	F_1:7085326-7088687	AGATGAGGAGAACAAGCCTA	59.04	R_1:7085326-7088687	ATCCTGTCCATTACTCCTTG	58.96	170
1:26715933-26716400	AT1G70850,	-	F_AT1G70850	GCTCTATCGTCTTCTGGAAC	58.96	R_AT1G70850	CGCTGATTTTCTCATACTCA	58.71	221
1:20066441-20074643	n/a	-	F_1:20066441-20074643	TGTGTTCTTTGACGAAGTTG	58.91	R_1:20066441-20074643	AGATCAGGCAGACAAAACTC	58.93	231
1:22359475-22363105	n/a	-	F_1:22359475-22363105	GACCAAATATGGAATCAGGT	58.98	R_1:22359475-22363105	GCCTTCTTCAACTAGCTTCT	58.87	196
ChrC:419-556	ATCG00020,	-	F_ATCG00020	TATTAACCGTGCTAACCTTG	59.18	R_ATCG00020	ACACGTCCTTGACTATCAACT	57.98	116
3:4922906-4925556	n/a	+	F_3:4922906-4925556	TGATGGTGATAAATGGACAA	58.91	R_3:4922906-4925556	AAATATCCTCTGCCCTTCTA	59.18	247
	AT3G18780	+	F_ACT2_ref	CTTGCACCAAGCAGCATGAA	63.45	R_ACT2_ref	CCGATCCAGACACTGTACTTCCTT	62.91	68

## Sheet: Supplementary Table 2
Supplementary Table 2 A. The information for the R- RNA-seq libraries.
	Filtration			A. thalianagenome [TAIR10]		rRNA		Number of mappings to the chromosomes
	Number of raw pair-end reads	Reads that passed filtration	% of passed reads	number of mapped reads	% of filtered reads	number of mapped reads	% of filtered reads	1	2	3	4	5	Mt	chloroplast
Seedling_Seq1	31935702	31790065	0.99544	31122697	0.979007	1313224	0.0413093	8700636	5195239	6237533	4075802	6387283	974839	36092950
Seedling_Seq2	68612452	67577183	0.984911	65706157	0.972313	2635198	0.0389954	17115383	10130719	12466207	8523245	13561924	2133702	80216227
Seedling_Seq3	76304173	76246708	0.999247	70711628	0.927406	3726359	0.0488724	16272191	10169000	10205080	7627412	11427743	1815570	101859783
Seedling_Seq4	74588410	74356158	0.996886	68683406	0.923708	3656695	0.0491781	15629178	10077473	9997867	7436764	11201707	2037037	98019803
Root_Seq1	38952946	38735679	0.994422	37620457	0.971209	281077	0.00725628	20873171	13737392	16736178	11036591	15592910	3898647	2100840
Root_Seq2	68138465	67282475	0.987437	64971862	0.965658	404439	0.00601106	35152983	23939538	27837017	19416223	26589114	7281333	3874933
Root_Seq3	57386716	57344860	0.999271	49001422	0.854504	664548	0.0115886	30676423	19940677	18832165	15002631	21645472	6469205	3013845
Root_Seq4	69739263	69679538	0.999144	64399383	0.924222	660378	0.00947736	38653610	24884803	23541739	18908121	26910336	7893726	3653522
Leaf_Seq1	23434728	23349310	0.996355	22842507	0.978295	1538984	0.0659113	4959016	2996716	3355264	2245426	3129423	449873	31294801
Leaf_Seq2	69667409	68796805	0.987503	67016208	0.974118	4524145	0.065761	14409876	8903299	9679507	6947233	9642032	1569875	92786462
Leaf_Seq3	43129340	43128786	0.999987	42352792	0.982008	3263219	0.0756622	11258762	6938834	7619172	5278392	7167002	1064748	50411431
Leaf_Seq4	134562622	134559990	0.99998	132062908	0.981443	8919615	0.0662873	35694177	21611700	22930575	16509689	22474985	3519493	156851466
Leaf_Seq5	56593950	56584405	0.999831	55706683	0.984488	2959389	0.0523004	14642026	9127783	9432605	6652232	9243382	1562571	67951689
Leaf_Seq6	54037745	54024852	0.999761	51944399	0.961491	2620001	0.0484962	13302353	8210099	8514828	6070545	8324958	1417819	64457547
Flower_Seq1	35139303	34939467	0.994313	34107524	0.976189	784222	0.0224452	13979951	8787863	11577498	6905594	11296685	2127523	20984996
Flower_Seq2	66950263	65880066	0.984015	63809535	0.968571	1257104	0.0190817	26381827	16513478	20566905	13282340	21585564	4215086	38273993
Flower_Seq3	61918918	61871674	0.999237	57181186	0.92419	1492324	0.0241197	24338458	16294823	15816829	11830524	18829681	3971407	36950341
Flower_Seq4	54166574	54131614	0.999355	48951248	0.904301	1203976	0.0222416	21126970	14481905	14119431	10473425	16695435	3904194	30482941
	6.02922e+07	6.00155e+07	0.995394	5.71218e+07	0.952951		0.00601106
Supplementary Table 2 B. The information for the R+ RNA-seq libraries.							0.0756622
	Filtration			A. thalianagenome [TAIR10]		rRNA		Number of mappings to the chromosomes
	Number of raw pair-end reads	Reads that passed filtration	% of passed reads	number of mapped reads	% of filtered reads	number of mapped reads	% of filtered reads	1	2	3	4	5	Mt	chloroplast
Seedling_Seq1	18531422	18395534	0.992667	17886397	0.972323	425480	0.0231295	4820492	3086670	6989382	2085947	2250953	174469	23926870
Seedling_Seq2	33079583	32609714	0.985796	29717355	0.911304	285250	0.00874739	9310071	4828860	12119095	3791201	4025047	248050	38492483
Seedling_Seq3	27202103	27134822	0.997527	24367067	0.898	293026	0.0107989	11049546	6165144	5000374	2810516	1741207	139934	29268507
Seedling_Seq4	28863376	28807478	0.998063	26061931	0.904693	317325	0.0110154	6413910	4564562	5366378	2631676	1829411	216722	39767752
Root_Seq1	15764959	15635974	0.991818	15097607	0.965569	102367	0.00654689	11648789	5646721	14337617	3907827	3972408	262694	298401
Root_Seq2	27597800	27141957	0.983483	24563988	0.905019	72616	0.00267542	18550487	8474079	25978758	6107654	6247087	559965	1052596
Root_Seq3	24081865	24009870	0.99701	20886458	0.869911	210319	0.00875969	24654315	8315330	7068753	4594452	3398972	402153	552825
Root_Seq4	25207528	25170033	0.998513	22572764	0.896811	152738	0.00606825	23615947	9654039	9382206	5444986	4144851	381416	547482
Leaf_Seq1	14222622	14132734	0.99368	13732400	0.971673	123167	0.00871502	3428223	2071451	3706002	1046236	830628	71934	20188657
Leaf_Seq2	37852999	37442216	0.989148	35197917	0.94006	818133	0.0218505	6543722	3956544	8824374	2040560	1753476	190026	57898707
Leaf_Seq3	25492960	25439464	0.997902	22913733	0.900716	226501	0.00890353	14215907	5615549	4120013	2191405	1501425	128627	24439580
Leaf_Seq4	35372905	34329654	0.970507	31109079	0.906187	446078	0.012994	17023097	7771504	4549357	3022709	1817752	160917	35324860
Flower_Seq1	16423023	16300299	0.992527	15711624	0.963886	356063	0.021844	8868711	4141880	12763099	3129056	3455843	208435	8766452
Flower_Seq2	31947206	31464234	0.984882	29091367	0.924585	374621	0.0119062	14457790	5516689	23823844	5204166	6567639	412753	19285897
Flower_Seq3	25004943	24912584	0.996306	22598732	0.907121	260950	0.0104746	18229174	8780907	10668937	5739091	3935736	176268	7434016
Flower_Seq4	28281526	27453729	0.97073	23642270	0.861168	874285	0.0318458	21218183	9521231	9539467	5679793	3738992	203738	7126897
	2.59329e+07	2.56488e+07	0.990035	2.34469e+07	0.918689		0.00267542
							0.0318458

## Sheet: Suplementary Table 3 A
Supplementary Table 3 A. RNA-seq results obtained for all circRNAs in R- (supported by at least 2 back-spliced reads) and their linear counterparts in 2 independent biological replicates. The circRNAs confirmed in the PCR experiment are shown in blue; see Figure 1.
				Number of raw back-spliced reads
				Seedling								Root								Leaf												Flower
circRNA_ID	gene_id	number of exons	strand	circ_Seq1	lin_Seq1	circ_Seq2	lin_Seq2	circ_Seq3	lin_Seq3	circ_Seq4	lin_Seq4	circ_Seq1	lin_Seq1	circ_Seq2	lin_Seq2	circ_Seq3	lin_Seq3	circ_Seq4	lin_Seq4	circ_Seq1	lin_Seq1	circ_Seq2	lin_Seq2	circ_Seq3	lin_Seq3	circ_Seq4	lin_Seq4	circ_Seq5	lin_Seq5	circ_Seq6	lin_Seq6	circ_Seq1	lin_Seq1	circ_Seq2	lin_Seq2	circ_Seq3	lin_Seq3	circ_Seq4	lin_Seq4
5:1106879-1107381	AT5G04090,	1	-	17	53	14	104	20	103	22	96	43	349	76	486	66	454	89	564	4	56	18	99	24	150	59	345	15	81	18	105	29	166	61	249	75	302	65	209
1:382803-383130	AT1G02080,	2	+	1	76	5	210	5	248	1	287	11	385	14	658	9	848	10	1003	4	49	2	144	2	82	4	276	0	0	3	115	2	170	8	360	10	406	7	431
1:30349032-30349237	AT1G80750,	1	+	1	224	3	383	3	231	4	246	8	602	15	993	5	866	6	1083	1	30	4	96	1	52	9	166	0	0	0	0	5	436	10	805	7	515	3	418
2:19672192-19672380	AT2G48100,	1	+	1	40	2	150	5	89	2	121	5	230	12	465	8	495	13	563	0	0	5	92	3	72	2	246	0	0	1	67	3	109	4	249	3	182	4	184
4:13026572-13027129	AT4G25500,	1	+	0	0	2	340	0	0	0	0	4	550	6	1116	11	1019	9	1291	1	133	1	440	0	0	2	1062	0	0	2	253	3	328	1	603	1	394	1	373
2:16614068-16615133	AT2G39810,	2	+	1	50	1	131	1	92	2	93	0	0	1	337	0	0	3	307	1	16	0	0	1	47	4	160	2	54	3	59	4	88	6	259	8	150	2	157
2:17272368-17272938	AT2G41440,	3	+	0	0	0	0	3	25	0	0	5	108	0	0	0	0	3	115	0	0	1	8	1	7	3	24	0	0	0	0	2	72	6	124	7	78	2	96
1:3674466-3675958	AT1G11000,	5	-	0	0	1	10	1	17	2	28	0	0	3	7	0	0	0	0	0	0	0	0	0	0	0	0	0	0	0	0	4	57	4	122	3	145	8	173
3:3172073-3172253	AT3G10260,	1	-	0	0	0	0	1	383	2	298	3	861	3	1105	0	0	3	1438	0	0	2	279	0	0	0	0	0	0	1	363	1	410	2	609	4	695	2	552
2:14529841-14530023	AT2G34460,	1	+	1	292	0	0	0	0	3	804	0	0	0	0	0	0	1	117	0	0	3	371	1	227	1	766	0	0	2	357	2	288	4	497	2	1020	3	794
2:18973735-18973879	AT2G09695,	1	+	393	127	0	0	601	667	596	636	1555	584	390	766	2191	1801	3333	1850	248	204	201	476	0	0	0	0	0	0	3	160	923	367	929	699	2354	1651	1846	1193
Pt:979-1248	ATCG00020,	1	+	0	0	0	0	743	8029999	720	7202600	0	0	0	0	0	0	0	0	0	0	0	0	0	0	0	0	0	0	0	0	0	0	0	0	237	2364956	165	1598693
1:20310304-20310540	AT1G54410,	1	-	0	0	38	17477	5	5551	3	4730	101	44261	0	0	0	0	90	45220	20	8687	87	38164	176	29444	773	93064	0	0	60	12777	21	7716	0	0	5	6582	0	0
Pt:55928-144352	n/a		+	182	450680	527	1065341	0	0	0	0	0	0	0	0	0	0	0	0	104	279548	0	0	0	0	0	0	0	0	0	0	0	0	349	475412	0	0	0	0
2:18974209-18974352	AT2G09705,	1	+	71	524	39	375	22	426	44	515	166	1321	38	480	95	1030	201	2064	17	183	7	139	0	0	0	0	0	0	0	0	55	630	47	562	116	1337	80	1140
3:10035109-10036431	n/a		-	0	0	4	1	28	6	24	0	48	16	54	21	41	18	66	31	0	0	0	0	0	0	0	0	0	0	0	0	50	13	90	22	212	33	142	20
2:4485015-4486252	n/a		+	8	2	15	4	25	8	25	6	27	5	45	7	97	22	138	27	7	2	25	5	23	5	87	14	20	4	8	1	12	4	11	9	27	4	27	10
1:11778554-11780741	n/a		+	15	5	30	8	22	4	31	5	61	73	123	155	55	93	65	87	1	4	4	4	6	3	11	15	3	2	5	0	19	8	37	24	72	12	60	13
1:3469693-3469837	AT1G10522,	1	+	0	0	0	0	71	12434	71	13233	0	0	0	0	78	20567	58	20869	0	0	0	0	0	0	0	0	0	0	0	0	0	0	0	0	149	33669	126	24012
3:22656402-22656547	AT3G61198,	1	-	2	2824	0	0	49	5109	0	0	3	2950	0	0	136	14444	111	14894	0	0	0	0	0	0	0	0	0	0	0	0	1	2960	2	3843	190	19177	0	0
2:18973915-18974055	AT2G09700,	1	+	0	0	0	0	0	0	0	0	0	0	0	0	134	486	0	0	0	0	0	0	0	0	0	0	0	0	0	0	0	0	0	0	200	447	156	363
4:4196362-4197112	AT4G07390,	4	+	2	99	8	218	13	164	20	214	25	449	32	805	41	756	47	1000	8	57	16	172	16	117	62	426	12	125	10	165	8	299	24	555	52	573	32	502
2:4485096-4486252	n/a		+	4	11	15	20	6	25	4	28	12	33	28	40	69	87	88	159	5	14	20	31	11	20	47	62	9	12	10	11	3	7	9	32	14	36	5	31
1:11778554-11779629	n/a		+	5	16	18	34	9	25	8	32	37	153	61	288	28	151	33	187	0	0	5	9	6	6	10	29	5	4	6	4	14	32	16	54	29	74	28	52
Pt:1326-1501	n/a		+	0	0	135	2048827	0	0	12	3842803	0	0	0	0	0	0	0	0	154	1615092	0	0	0	0	0	0	0	0	0	0	0	0	0	0	0	0	0	0
4:15077028-15077410	AT4G30975,	2	+	0	0	1	12	3	10	3	10	36	43	35	51	101	46	112	61	0	0	0	0	1	0	2	0	0	0	0	0	0	0	0	0	1	0	1	2
3:16314559-16315697	n/a		+	4	4	4	7	1	6	6	9	70	95	111	191	12	101	16	149	0	0	1	2	0	0	3	4	0	0	0	0	6	12	14	12	33	11	12	11
Pt:1142-123669	n/a		-	0	0	0	0	0	0	0	0	0	0	0	0	0	0	0	0	0	0	286	2630242	0	0	0	0	0	0	0	0	0	0	0	0	0	0	0	0
1:12383203-12384469	n/a		-	2	2	3	8	11	12	12	3	37	39	45	92	20	75	26	86	2	0	4	2	2	1	7	2	0	0	1	1	10	12	20	18	54	32	19	23
1:12381927-12382805	n/a		-	0	0	3	2	18	3	15	6	18	32	25	51	20	62	31	64	1	0	6	1	0	0	5	8	0	0	0	0	16	6	27	14	38	12	30	10
1:12195268-12196524	AT1G33615,	3	-	1	7	7	15	13	16	10	14	17	103	32	169	13	156	35	181	3	1	3	10	3	2	13	10	5	3	8	1	5	18	10	39	18	36	14	32
1:29911240-29911379	AT1G09867,	1	-	0	0	0	0	17	198	13	195	0	0	0	0	64	695	22	683	0	0	0	0	0	0	0	0	0	0	0	0	0	0	0	0	40	534	27	385
Pt:601-738	ATCG00020,	1	-	0	0	0	0	93	9201886	71	8225062	0	0	0	0	0	0	0	0	0	0	0	0	0	0	0	0	0	0	0	0	2	877552	0	0	0	0	14	1793209
1:12197021-12199193	n/a		-	2	5	0	0	3	6	4	10	49	106	50	134	22	114	17	140	0	0	2	4	0	0	3	4	0	0	0	0	3	5	9	19	7	21	6	13
1:12598733-12600110	AT1G34460,	5	+	0	0	3	11	0	0	11	6	9	27	13	71	23	61	39	115	2	6	3	6	0	0	8	11	5	4	3	7	8	20	12	45	20	41	13	32
1:17582831-17584833	n/a		+	2	2	10	8	1	4	4	6	24	34	35	73	12	57	15	80	0	0	0	0	0	0	3	0	0	0	0	0	8	13	18	6	17	17	18	19
3:5566863-5572941	n/a		+	0	0	0	0	0	0	136	358	0	0	0	0	0	0	0	0	2	6	0	0	0	0	0	0	0	0	0	0	7	36	0	0	18	35	0	0
5:7609707-7614434	n/a		+	6	15	6	28	6	23	4	22	13	47	26	108	22	78	25	90	0	0	5	12	0	0	9	20	2	3	1	3	0	0	6	42	12	50	20	58
Pt:55772-55942	ATCG00490,	1	+	0	0	0	0	69	1804724	42	1758649	0	0	0	0	1	15974	0	0	0	0	0	0	0	0	0	0	0	0	0	0	0	0	0	0	18	763485	25	629906
1:12195268-12196544	AT1G33615,	3	-	1	4	1	10	2	15	0	0	42	70	62	141	16	120	20	146	0	0	2	8	0	0	0	0	0	0	0	0	0	0	1	28	2	24	1	21
5:5576809-5579580	n/a		-	0	0	0	0	69	281	65	248	4	9	0	0	2	6	0	0	0	0	0	0	0	0	0	0	0	0	0	0	0	0	0	0	0	0	0	0
3:16310118-16311208	n/a		+	1	1	4	9	0	0	1	5	26	60	27	88	12	77	16	111	0	0	2	1	2	0	1	4	0	0	0	0	4	9	13	14	14	17	5	8
2:4485020-4486252	n/a		+	0	0	2	4	11	8	5	6	6	5	7	7	22	22	37	28	1	3	5	5	1	5	12	15	3	4	3	1	2	4	1	9	3	4	2	11
5:7609577-7614434	n/a		+	3	12	2	20	6	14	11	15	13	35	10	73	6	52	14	47	0	0	2	11	2	3	3	15	1	3	2	2	8	23	7	35	14	28	12	35
1:3059807-3064874	n/a		+	0	0	0	0	7	111	3	91	0	0	0	0	0	0	18	213	0	0	0	0	6	77	51	185	0	0	0	0	8	75	0	0	0	0	20	173
1:7085326-7088687	n/a		-	0	0	0	0	0	0	0	0	0	0	0	0	21	3774	0	0	0	0	23	12356	0	0	0	0	0	0	0	0	0	0	16	11573	48	5997	0	0
5:21945393-21990774	n/a		-	0	0	0	0	0	0	0	0	0	0	0	0	0	0	0	0	0	0	0	0	0	0	0	0	0	0	0	0	0	0	0	0	61	18033	41	13061
1:26715933-26716400	AT1G70850,	1	-	0	0	0	0	0	0	0	0	0	0	38	15707	23	6939	40	9136	0	0	0	0	0	0	0	0	0	0	0	0	0	0	0	0	0	0	0	0
1:12195268-12196344	AT1G33615,	3	-	3	11	3	26	11	22	6	23	3	146	6	227	4	183	6	221	2	3	3	16	4	4	13	21	3	6	4	4	4	25	5	46	12	63	6	59
2:2184672-2184820	AT2G04955,	1	-	0	0	0	0	8	3510	7	3325	0	0	0	0	14	8803	12	9457	0	0	0	0	0	0	0	0	0	0	0	0	0	0	0	0	22	12651	29	9093
3:2642135-2644091	n/a		+	0	0	3	46	0	0	0	0	0	0	0	0	20	273	21	274	0	0	0	0	8	38	29	149	4	34	0	0	7	89	0	0	0	0	0	0
1:12383203-12384363	n/a		-	1	1	2	5	5	14	6	6	13	38	4	100	13	66	11	83	0	0	0	0	0	0	4	4	4	1	0	0	0	0	7	22	10	35	10	27
1:1631579-1631842	AT1G05520,	1	-	1	63	0	0	1	128	3	143	14	242	9	432	7	450	8	532	0	0	2	102	7	100	7	232	4	93	3	77	4	148	6	304	10	265	4	259
4:9044498-9044699	AT4G15955,	1	-	1	19	6	37	0	0	0	0	0	0	12	160	9	124	16	145	2	9	4	37	0	0	23	126	4	35	4	41	3	48	0	0	6	100	0	0
5:14738507-14739306	AT5G37240,	4	-	0	0	2	6	1	1	2	2	4	24	15	58	3	35	7	46	0	0	1	3	0	0	3	5	1	4	0	0	9	13	14	33	13	8	13	23
1:12599082-12600110	AT1G34460,	5	+	0	0	4	13	0	0	0	0	10	40	7	93	11	77	23	119	0	0	0	0	3	13	0	0	0	0	0	0	3	26	8	84	8	52	8	45
1:29954420-29955106	AT1G79610,	5	-	2	29	2	39	0	0	2	39	13	174	8	249	6	315	12	379	1	16	3	57	2	31	5	49	0	0	1	37	0	0	5	185	13	275	9	200
3:17173528-17174520	n/a		-	0	0	3	8	0	0	3	3	17	40	26	81	9	47	7	62	0	0	0	0	2	1	0	0	2	7	4	1	1	5	4	8	3	7	2	16
4:5923655-5924099	AT4G09320,	2	+	0	0	2	5161	4	4424	0	0	5	5186	0	0	22	6830	21	8702	0	0	0	0	0	0	0	0	0	0	0	0	0	0	0	0	13	7453	15	5245
Pt:934-11277	n/a		-	0	0	0	0	0	0	0	0	0	0	0	0	0	0	0	0	0	0	77	4290803	0	0	0	0	0	0	0	0	0	0	0	0	0	0	0	0
5:7584873-7594683	n/a		-	7	25	0	0	0	0	12	67	0	0	0	0	0	0	0	0	0	0	12	40	7	23	22	60	8	26	0	0	0	0	0	0	7	53	0	0
1:22359475-22363105	n/a		-	1	15	1	25	2	47	3	41	9	197	13	290	7	403	30	519	2	6	1	23	0	0	0	0	0	0	1	21	0	0	1	38	1	16	2	14
2:9786583-9798967	n/a		+	8	261	0	0	25	885	0	0	0	0	0	0	0	0	1	3	2	189	0	0	0	0	0	0	0	0	0	0	8	308	17	644	12	521	0	0
3:17169794-17170903	AT3G46614,	6	-	3	4	4	3	0	0	2	2	12	35	22	38	4	37	8	42	0	0	3	2	2	0	0	0	1	0	0	0	3	1	4	7	4	6	1	7
4:5059540-5060151	n/a		-	0	0	1	3	5	7	6	8	3	8	4	13	8	18	3	18	2	0	2	7	0	0	8	8	7	7	7	9	2	7	4	16	7	6	4	10
4:6884521-6887831	n/a		+	0	0	0	0	0	0	0	0	0	0	0	0	27	18238	46	22278	0	0	0	0	0	0	0	0	0	0	0	0	0	0	0	0	0	0	0	0
1:12598689-12600110	AT1G34460,	5	+	1	3	0	0	5	15	2	9	5	37	7	76	9	62	13	119	0	0	2	6	0	0	3	10	2	6	0	0	3	29	7	53	3	41	6	37
3:19094437-19095353	AT3G51460,	4	+	0	0	1	216	5	149	2	198	4	355	13	816	5	519	5	662	1	45	3	141	1	108	3	282	2	88	2	94	6	250	5	491	7	378	3	354
5:25182042-25184894	n/a		+	0	0	0	0	0	0	0	0	9	2774	0	0	18	3482	38	4299	0	0	0	0	0	0	0	0	0	0	0	0	0	0	0	0	0	0	0	0
3:8391219-8391932	AT3G23430,	2	-	0	0	0	0	0	0	1	109	11	2320	14	4272	17	2437	16	3052	0	0	0	0	1	15	0	0	0	0	2	19	0	0	1	32	0	0	0	0
5:14738507-14739294	AT5G37240,	4	-	3	6	1	8	4	1	0	0	7	33	15	87	2	38	3	53	0	0	2	3	0	0	3	5	0	0	1	0	3	17	16	39	0	0	3	24
5:8350547-8352822	AT5G24450,	7	+	1	39	0	0	5	144	3	123	5	202	8	365	10	355	8	402	0	0	1	102	0	0	2	248	2	81	4	66	0	0	4	248	8	195	2	188
Pt:601-1269	ATCG00020,	1	-	0	0	0	0	40	8583217	0	0	0	0	0	0	0	0	0	0	0	0	10	3213043	0	0	12	3613379	1	1736234	0	0	0	0	0	0	0	0	0	0
2:12961640-12964647	n/a		-	4	106	5	177	1	110	2	105	0	0	0	0	0	0	0	0	5	50	7	156	4	95	18	320	13	238	3	204	0	0	0	0	0	0	0	0
3:10033829-10036431	n/a		-	0	0	2	0	6	3	2	0	5	7	3	13	2	14	3	9	0	0	0	0	0	0	0	0	0	0	0	0	6	4	6	7	20	18	7	10
4:16535960-16536097	AT4G34620,	1	-	13	4686	12	7649	2	5794	3	5442	2	1169	3	1349	0	0	0	0	1	1496	8	3365	0	0	0	0	0	0	0	0	6	3388	9	5862	2	5209	1	3793
Pt:55216-55411	ATCG00490,	1	-	0	0	8	797032	0	0	46	1318371	0	0	0	0	0	0	0	0	5	309647	0	0	0	0	0	0	0	0	0	0	0	0	0	0	0	0	0	0
3:11155468-11155611	AT3G29185,	1	-	1	221	0	0	1	391	2	387	0	0	7	121	2	120	1	166	1	99	2	279	6	211	8	611	4	352	0	0	1	232	13	398	4	327	5	268
Pt:55772-55976	ATCG00490,	1	+	0	0	0	0	32	1873499	25	1823747	0	0	0	0	0	0	0	0	0	0	0	0	0	0	0	0	0	0	0	0	0	0	0	0	0	0	0	0
2:15029955-15030107	AT2G35750,	1	+	4	21756	0	0	4	39024	3	42445	12	59669	3	62524	3	123831	13	155395	0	0	0	0	0	0	0	0	0	0	0	0	0	0	7	55085	2	110526	5	85698
4:5059540-5063374	n/a		-	1	1	1	5	2	5	2	8	2	7	6	10	6	13	13	18	3	1	3	1	0	0	0	0	4	6	0	0	0	0	4	10	5	6	3	9
1:22582297-22584333	AT1G61240,	12	+	0	0	2	73	2	86	5	81	3	164	2	234	2	228	2	258	0	0	0	0	0	0	2	116	4	59	1	50	8	109	12	187	9	196	0	0
1:7558475-7560288	AT1G21580,	6	-	4	24	3	56	1	79	3	108	0	0	11	188	0	0	0	0	3	20	4	91	5	64	13	202	1	72	2	76	0	0	0	0	3	93	1	85
2:13271934-13272117	AT2G31141,	1	-	0	0	0	0	0	0	0	0	0	0	0	0	0	0	31	237378	0	0	0	0	0	0	0	0	0	0	0	0	0	0	0	0	0	0	23	209265
3:16310118-16311179	n/a		+	0	0	5	11	0	0	0	0	7	83	12	109	10	99	7	140	0	0	0	0	0	0	0	0	0	0	0	0	2	9	4	21	5	26	2	11
4:7887111-7887618	n/a		-	0	0	2	100	2	145	1	153	0	0	0	0	0	0	0	0	3	101	11	262	8	231	18	678	4	324	5	298	0	0	0	0	0	0	0	0
5:23157629-23159628	AT5G57160,	9	-	0	0	2	42	4	39	5	49	3	103	5	163	5	168	4	199	3	2	4	49	2	12	4	81	2	31	0	0	0	0	5	64	3	53	3	64
1:19522099-19522642	AT1G52410,	4	+	0	0	0	0	0	0	0	0	3	743	2	1670	10	1072	21	1346	0	0	0	0	1	208	0	0	0	0	0	0	0	0	4	1510	12	1092	0	0
2:15029955-15030115	AT2G35750,	1	+	3	20051	0	0	5	36287	2	39468	7	55447	3	58951	4	113995	13	143411	0	0	0	0	0	0	0	0	0	0	1	31564	1	35416	2	51857	5	102025	7	79341
2:19063375-19067011	n/a		+	1	13	0	0	5	59	4	50	4	22	2	46	5	131	23	174	1	12	0	0	0	0	0	0	0	0	0	0	3	31	0	0	2	42	1	38
3:4819688-4822739	n/a		+	3	1512	0	0	0	0	9	3777	0	0	0	0	0	0	0	0	4	1040	0	0	6	2316	15	7017	0	0	4	2683	4	1283	0	0	4	2485	2	2242
5:6761330-6763611	n/a		+	0	0	2	1067	2	950	1	875	5	1439	9	2092	11	2266	2	2859	0	0	1	557	0	0	0	0	0	0	0	0	2	1111	2	2068	8	1887	5	1537
5:900654-901168	AT5G03560,	2	-	2	19	2	39	2	61	2	71	3	107	3	163	9	208	10	261	0	0	1	47	2	34	4	142	4	42	0	0	1	63	2	91	3	119	0	0
5:7951290-7951442	AT5G23580,	1	-	3	29	2	62	1	47	2	62	3	260	2	419	6	294	6	431	0	0	4	30	1	17	3	47	3	28	0	0	6	76	4	165	0	0	3	124
3:17445498-17445652	AT3G07725,	1	+	1	48	0	0	4	194	5	171	2	159	0	0	8	491	10	474	0	0	0	0	0	0	0	0	0	0	0	0	1	187	0	0	12	583	5	436
3:22942458-22942716	AT3G61960,	1	-	1	63	1	107	5	104	2	128	3	313	5	544	6	378	8	463	0	0	0	0	1	161	0	0	2	61	2	68	0	0	2	326	5	288	5	259
1:20066441-20074643	n/a		-	0	0	1	376	0	0	0	0	7	638	10	849	0	0	4	1415	2	91	3	235	3	172	5	470	3	235	0	0	2	512	5	773	0	0	2	780
3:17953266-17954439	AT3G48470,	3	+	0	0	3	21	2	16	0	0	3	48	2	62	0	0	0	0	1	4	1	4	0	0	13	13	2	13	1	12	0	0	4	60	10	75	5	69
5:14739655-14741529	n/a		-	1	2	3	12	1	2	1	2	11	33	10	81	3	29	10	33	0	0	0	0	1	7	1	5	0	0	0	0	0	0	1	34	4	29	0	0
5:15377911-15381442	n/a		-	10	17875	0	0	0	0	9	28961	0	0	0	0	0	0	0	0	4	5021	0	0	0	0	0	0	0	0	9	17192	0	0	0	0	6	19206	9	15927
1:19522402-19522642	AT1G52410,	2	+	0	0	0	0	0	0	2	125	2	668	0	0	0	0	9	1192	0	0	0	0	0	0	0	0	0	0	0	0	3	593	4	1294	12	990	14	899
3:16310126-16311208	n/a		+	0	0	1	9	1	2	0	0	3	65	12	89	6	78	9	110	0	0	1	1	1	0	2	4	0	0	0	0	1	9	3	14	2	18	4	10
4:13798788-13800094	AT4G27640,	7	-	0	0	2	210	5	224	5	208	2	287	3	435	0	0	3	546	0	0	2	87	0	0	0	0	0	0	3	108	5	184	4	377	5	220	7	244
5:4002358-4014861	n/a		+	0	0	0	0	0	0	11	44	0	0	0	0	8	107	12	128	0	0	0	0	0	0	0	0	0	0	0	0	0	0	0	0	11	58	4	91
3:21722439-21725765	n/a		-	0	0	0	0	1	90	3	97	0	0	0	0	4	173	7	224	0	0	10	32	6	22	0	0	0	0	0	0	0	0	0	0	8	268	6	270
4:12480688-12481259	AT4G24020,	1	+	0	0	5	175	5	368	4	381	1	283	5	434	5	640	5	761	0	0	0	0	0	0	7	465	3	194	0	0	2	88	0	0	1	171	2	162
4:2719063-2719462	AT4G05320,	1	+	0	0	0	0	2	15376	0	0	10	15005	12	23079	0	0	0	0	5	2439	0	0	0	0	0	0	0	0	0	0	9	7522	7	13822	0	0	0	0
5:16882635-16889500	n/a		+	2	49	0	0	4	114	0	0	0	0	0	0	2	62	5	72	5	19	0	0	0	0	0	0	0	0	7	54	4	129	0	0	16	288	0	0
2:14533800-14534012	AT2G34480,	2	-	0	0	0	0	0	0	0	0	0	0	0	0	0	0	32	7693	0	0	0	0	0	0	0	0	0	0	0	0	0	0	0	0	0	0	12	4089
2:16613843-16615133	AT2G39810,	3	+	0	0	0	0	0	0	3	102	4	168	8	365	1	290	7	337	0	0	3	71	0	0	1	140	1	56	3	62	2	94	4	258	6	163	1	161
5:15904931-16053951	n/a		-	0	0	9	4142	0	0	0	0	10	3347	6	6208	0	0	0	0	0	0	0	0	0	0	0	0	0	0	0	0	14	3081	5	6518	0	0	0	0
5:3005360-3015098	n/a		+	0	0	0	0	0	0	3	27635	1	49455	1	52789	7	123607	13	155637	0	0	0	0	0	0	0	0	0	0	0	0	3	25005	2	42987	9	121549	5	84793
1:12383203-12384513	n/a		-	0	0	0	0	0	0	0	0	12	34	14	96	5	85	9	92	0	0	0	0	0	0	0	0	0	0	0	0	1	14	0	0	0	0	1	24
5:15517280-15521015	n/a		+	0	0	0	0	1	9	1	16	4	33	10	62	4	64	7	90	0	0	0	0	0	0	0	0	0	0	0	0	2	12	5	23	4	22	4	20
1:12381927-12384469	n/a		-	0	0	1	8	3	5	2	4	9	44	4	73	4	83	0	0	0	0	0	0	0	0	5	7	0	0	0	0	1	8	2	16	2	22	8	16
1:12598848-12600110	AT1G34460,	5	+	0	0	0	0	0	0	1	8	0	0	2	46	10	52	10	101	0	0	0	0	0	0	1	13	1	6	3	7	0	0	3	37	8	44	2	29
3:16309808-16311208	n/a		+	0	0	0	0	0	0	1	5	13	35	6	60	6	64	4	78	0	0	0	0	0	0	0	0	0	0	0	0	1	2	4	11	4	3	2	8
3:19094426-19095353	AT3G51460,	4	+	0	0	3	219	2	165	4	203	3	361	5	811	2	537	7	697	0	0	1	144	0	0	7	270	0	0	0	0	2	250	2	488	1	383	2	369
1:12195268-12199193	n/a		-	0	0	0	0	0	0	1	15	11	91	20	169	0	0	5	171	0	0	0	0	0	0	0	0	0	0	0	0	0	0	0	0	3	23	0	0
1:20068238-20081052	n/a		-	0	0	0	0	2	445	6	441	0	0	0	0	8	1307	8	1644	0	0	0	0	0	0	0	0	0	0	0	0	0	0	0	0	10	1404	6	1180
2:8659532-8660567	AT2G20060,	4	+	1	115	0	0	0	0	3	172	3	339	5	554	4	531	4	682	0	0	0	0	2	44	3	127	2	111	0	0	0	0	2	420	6	446	5	280
3:17171456-17172914	n/a		-	0	0	0	0	2	4	1	2	7	24	11	67	5	51	5	72	0	0	0	0	0	0	0	0	0	0	0	0	3	6	0	0	3	15	3	12
Pt:13357-13516	n/a		-	0	0	0	0	4	104256	9	114182	0	0	0	0	0	0	0	0	0	0	2	143615	1	55764	4	182483	4	107372	8	109181	0	0	3	77419	0	0	5	49861
4:7887116-7887618	n/a		-	3	89	0	0	0	0	0	0	0	0	0	0	0	0	0	0	1	105	7	281	5	269	15	763	4	360	3	344	0	0	0	0	0	0	0	0
1:20295245-20296559	AT1G54370,	7	-	1	44	2	121	0	0	3	111	0	0	0	0	2	386	7	494	2	24	0	0	0	0	4	140	0	0	0	0	2	118	0	0	7	205	7	215
2:17138307-17138573	AT2G41100,	1	+	0	0	0	0	0	0	0	0	0	0	0	0	0	0	0	0	0	0	0	0	0	0	0	0	0	0	0	0	0	0	0	0	22	423	15	368
3:11289661-11291634	AT3G29390,	7	+	0	0	0	0	0	0	0	0	2	157	2	262	14	231	17	309	0	0	0	0	0	0	0	0	1	66	0	0	0	0	0	0	1	147	0	0
5:19624720-19624869	AT5G07105,	1	+	1	34	0	0	6	79	5	81	0	0	0	0	0	0	9	254	0	0	0	0	0	0	0	0	0	0	0	0	0	0	0	0	7	252	9	192
5:1808562-1808716	AT5G01135,	1	+	0	0	0	0	0	0	0	0	0	0	0	0	36	117	0	0	0	0	0	0	0	0	0	0	0	0	0	0	0	0	0	0	0	0	0	0
Pt:56072-56226	ATCG00490,	1	-	0	0	0	0	22	1939081	0	0	0	0	0	0	0	0	0	0	0	0	0	0	0	0	0	0	0	0	0	0	0	0	0	0	0	0	14	693277
1:950404-951211	AT1G03780,	4	-	1	111	0	0	0	0	1	144	6	205	8	380	1	308	4	399	1	7	0	0	0	0	0	0	1	11	0	0	2	112	0	0	7	212	3	199
5:15663366-15684116	n/a		-	0	0	0	0	0	0	0	0	0	0	0	0	35	1156	0	0	0	0	0	0	0	0	0	0	0	0	0	0	0	0	0	0	0	0	0	0
5:5583071-5585938	n/a		-	1	16	0	0	0	0	8	53	0	0	0	0	4	45	4	45	0	0	0	0	0	0	0	0	0	0	0	0	0	0	0	0	0	0	18	96
5:6753369-6757914	n/a		+	0	0	0	0	0	0	12	310	0	0	0	0	0	0	0	0	0	0	0	0	0	0	0	0	0	0	1	143	0	0	0	0	0	0	22	492
1:10498644-10499244	AT1G29965,AT1G29970,	3	-	0	0	4	282	0	0	2	138	6	129	7	393	4	248	0	0	0	0	0	0	0	0	5	173	0	0	0	0	1	169	3	471	1	227	1	214
1:28587466-28587612	AT1G76180,	1	-	0	0	0	0	0	0	0	0	0	0	0	0	0	0	22	26214	0	0	0	0	0	0	0	0	0	0	0	0	0	0	0	0	12	21113	0	0
1:7178470-7181069	n/a		+	0	0	0	0	0	0	0	0	0	0	0	0	0	0	0	0	4	841	0	0	9	2204	0	0	2	1884	0	0	0	0	19	4467	0	0	0	0
2:11817644-11819254	n/a		+	0	0	0	0	0	0	0	0	0	0	0	0	18	3671	0	0	0	0	0	0	0	0	0	0	0	0	0	0	0	0	16	5189	0	0	0	0
2:15910564-15910878	AT2G38020,	2	-	0	0	1	132	1	158	4	120	4	301	5	504	3	492	3	534	0	0	0	0	0	0	5	288	0	0	2	64	0	0	2	298	2	234	2	239
1:16912770-16913095	AT1G44790,	3	-	0	0	0	0	0	0	2	135	5	277	4	390	3	548	3	743	0	0	0	0	0	0	0	0	0	0	1	231	2	197	6	326	4	278	3	240
1:28269963-28270233	AT1G75340,	2	-	0	0	0	0	6	43	2	47	2	60	6	122	10	124	0	0	0	0	3	39	0	0	0	0	0	0	0	0	0	0	4	91	0	0	0	0
2:17954032-17954231	AT2G43180,	1	-	0	0	0	0	1	43	0	0	0	0	4	100	8	52	9	78	1	23	0	0	3	65	2	279	0	0	0	0	0	0	0	0	0	0	5	63
3:2114623-2117602	n/a		-	0	0	0	0	7	1907	3	1843	0	0	0	0	7	2842	0	0	0	0	0	0	0	0	2	1517	0	0	1	692	0	0	0	0	7	3529	6	2660
5:2351207-2353808	n/a		+	0	0	0	0	0	0	0	0	0	0	0	0	0	0	0	0	0	0	0	0	0	0	0	0	0	0	0	0	0	0	0	0	33	2304	0	0
5:26792958-26793181	AT5G67130,	1	+	0	0	0	0	0	0	0	0	2	361	5	515	6	482	5	627	0	0	0	0	0	0	0	0	2	72	2	92	1	324	0	0	6	465	4	425
1:12599575-12600110	AT1G34460,	3	+	0	0	0	0	0	0	0	0	0	0	0	0	9	106	12	148	0	0	0	0	0	0	3	19	0	0	0	0	0	0	4	70	3	78	1	45
3:16314569-16315697	n/a		+	0	0	0	0	0	0	0	0	7	105	11	205	4	107	4	153	0	0	0	0	0	0	0	0	0	0	0	0	1	14	1	13	2	14	2	13
3:5400792-5400993	AT3G15950,	2	-	0	0	0	0	6	1118	11	1034	0	0	0	0	15	2319	0	0	0	0	0	0	0	0	0	0	0	0	0	0	0	0	0	0	0	0	0	0
4:6526748-6527634	AT4G10570,	4	-	2	28	0	0	1	68	2	75	1	136	3	164	5	204	6	251	0	0	0	0	0	0	1	72	0	0	1	27	2	58	3	117	5	168	0	0
5:7015574-7015794	AT5G20720,	2	+	0	0	0	0	9	3677	0	0	0	0	0	0	0	0	0	0	0	0	0	0	0	0	0	0	3	2629	0	0	0	0	0	0	15	3575	5	3034
Pt:55772-56098	ATCG00490,	1	+	1	832567	0	0	11	1917302	18	1871809	0	0	0	0	0	0	0	0	0	0	2	1525652	0	0	0	0	0	0	0	0	0	0	0	0	0	0	0	0
1:17582831-17584817	n/a		+	1	2	1	10	0	0	0	0	14	52	3	107	2	60	2	92	0	0	0	0	0	0	0	0	0	0	0	0	1	15	2	25	1	21	4	25
1:24047787-24047963	AT1G64720,	1	-	0	0	1	1256	3	1313	3	2032	1	294	0	0	0	0	1	422	0	0	1	4630	0	0	13	10368	2	1769	2	1494	0	0	2	1432	0	0	2	1038
2:17946205-17946444	AT2G43150,	1	-	0	0	0	0	0	0	0	0	0	0	0	0	0	0	31	2181	0	0	0	0	0	0	0	0	0	0	0	0	0	0	0	0	0	0	0	0
2:5912593-5913797	AT2G14050,	5	+	2	7	1	21	4	24	3	20	5	40	1	58	1	53	2	75	0	0	0	0	2	22	4	53	1	19	2	16	0	0	1	59	0	0	2	49
4:6662514-6664511	n/a		+	0	0	1	28	1	14	3	17	3	70	9	151	0	0	5	115	0	0	0	0	0	0	1	27	0	0	0	0	2	21	2	50	1	51	3	53
Pt:32805-33020	ATCG00270,	1	+	0	0	0	0	6	105037	11	134239	0	0	0	0	0	0	0	0	0	0	3	164892	0	0	0	0	0	0	0	0	0	0	0	0	6	52802	5	58461
1:24702386-24708882	n/a		-	0	0	0	0	0	0	0	0	3	893	8	1167	7	2244	12	2825	0	0	0	0	0	0	0	0	0	0	0	0	0	0	0	0	0	0	0	0
2:699062-699656	AT2G02570,	3	-	2	125	2	275	2	221	0	0	0	0	6	768	1	515	5	667	0	0	0	0	0	0	6	514	0	0	0	0	1	241	1	519	2	298	2	304
3:17171472-17172914	n/a		-	2	2	0	0	0	0	0	0	9	35	10	81	1	54	4	76	0	0	1	2	0	0	0	0	0	0	0	0	0	0	0	0	3	15	0	0
5:15378136-15384895	n/a		-	5	19943	0	0	0	0	0	0	0	0	0	0	0	0	0	0	1	5429	0	0	0	0	3	30819	4	30100	0	0	0	0	0	0	12	23732	5	19364
3:4922906-4925556	n/a		+	0	0	29	302	0	0	0	0	0	0	0	0	0	0	0	0	0	0	0	0	0	0	0	0	0	0	0	0	0	0	0	0	0	0	0	0
4:8290830-8296962	n/a		+	0	0	0	0	1	29	0	0	0	0	0	0	0	0	0	0	3	232	6	837	0	0	15	1566	1	260	3	638	0	0	0	0	0	0	0	0
5:16396098-16399921	AT5G40910,	5	+	2	36	2	88	2	88	0	0	2	229	5	520	3	495	5	644	0	0	0	0	0	0	2	174	1	46	0	0	1	83	2	198	1	149	1	184
5:6525092-6525754	AT5G19370,	3	-	0	0	0	0	3	432	0	0	4	181	6	298	2	365	5	472	1	84	0	0	0	0	0	0	1	312	0	0	1	283	2	522	2	459	2	432
1:4609493-4609728	AT1G13440,	2	+	0	0	0	0	3	7619	1	7175	0	0	0	0	7	12745	7	15885	0	0	0	0	0	0	0	0	0	0	0	0	0	0	0	0	7	9351	3	7277
1:7145691-7149015	n/a		+	0	0	0	0	0	0	0	0	0	0	9	18171	7	17996	0	0	0	0	0	0	4	9055	5	29768	0	0	1	11346	0	0	2	5302	0	0	0	0
3:23037241-23037428	AT3G62250,	1	+	0	0	7	5762	7	4211	0	0	0	0	0	0	0	0	0	0	0	0	2	1063	0	0	3	2863	3	2292	3	1895	0	0	0	0	0	0	3	6334
4:15518699-15518883	AT4G32120,	1	-	0	0	0	0	0	0	0	0	0	0	11	197	3	200	5	247	0	0	0	0	0	0	0	0	2	33	0	0	2	55	0	0	2	143	3	109
4:2719291-2719462	AT4G05320,	1	+	7	3878	0	0	3	16150	0	0	0	0	2	24934	0	0	2	33982	0	0	5	7554	0	0	0	0	0	0	0	0	0	0	0	0	6	15303	3	12732
5:15262271-15262561	AT5G38212,	1	-	0	0	0	0	1	29	1	29	6	41	0	0	4	77	8	93	1	8	0	0	0	0	5	44	0	0	0	0	0	0	1	31	0	0	1	23
5:15378136-15381717	n/a		-	0	0	0	0	0	0	0	0	0	0	0	0	0	0	0	0	7	5977	0	0	4	9148	0	0	0	0	0	0	0	0	0	0	0	0	17	21241
Pt:41530-41739	ATCG00350,	1	+	4	55768	0	0	8	152939	7	191308	0	0	0	0	0	0	0	0	0	0	0	0	1	98389	2	338277	2	190595	0	0	0	0	0	0	2	71698	2	79231
1:12195268-12196367	AT1G33615,	3	-	2	9	0	0	6	17	1	20	0	0	0	0	4	177	2	206	0	0	1	11	1	3	3	15	1	5	0	0	0	0	3	50	2	57	1	49
1:29592906-29595435	n/a		+	0	0	0	0	3	353	3	293	0	0	0	0	0	0	0	0	0	0	0	0	1	514	5	1562	0	0	0	0	0	0	0	0	15	962	0	0
3:5399469-5399671	AT3G15950,	2	-	2	267	4	355	14	906	0	0	7	1980	0	0	0	0	0	0	0	0	0	0	0	0	0	0	0	0	0	0	0	0	0	0	0	0	0	0
5:15025579-15025974	n/a		+	0	0	1	23	2	17	2	17	0	0	9	59	1	85	3	76	0	0	0	0	0	0	0	0	0	0	0	0	0	0	4	39	3	56	2	65
Pt:9548-118402	n/a		-	0	0	0	0	27	14214	0	0	0	0	0	0	0	0	0	0	0	0	0	0	0	0	0	0	0	0	0	0	0	0	0	0	0	0	0	0
1:27436200-27439930	n/a		+	0	0	0	0	2	162	4	121	0	0	0	0	0	0	6	230	3	163	0	0	0	0	0	0	0	0	0	0	1	149	0	0	7	145	3	126
1:30059410-30064157	n/a		-	0	0	0	0	2	177	2	170	0	0	0	0	6	450	3	541	0	0	2	104	0	0	2	192	0	0	2	69	0	0	0	0	2	314	5	374
1:5447607-5447745	AT1G15820,	1	-	0	0	0	0	7	19521	6	17613	0	0	0	0	0	0	0	0	2	4125	1	8431	0	0	0	0	0	0	0	0	4	2774	6	4101	0	0	0	0
2:17138307-17138943	AT2G41100,	1	+	0	0	0	0	1	2277	0	0	0	0	0	0	6	2630	1	3258	0	0	0	0	3	1882	15	5565	0	0	0	0	0	0	0	0	0	0	0	0
3:2070787-2075130	n/a		-	0	0	0	0	4	3	0	0	2	15	2	28	5	39	7	52	0	0	1	2	0	0	0	0	1	0	0	0	0	0	2	28	0	0	2	12
4:12553664-12553846	AT4G24190,	2	-	0	0	0	0	0	0	0	0	1	2447	0	0	12	3213	12	3822	1	183	0	0	0	0	0	0	0	0	0	0	0	0	0	0	0	0	0	0
4:7124096-7131207	n/a		-	0	0	1	61	0	0	1	68	2	170	6	329	8	488	3	618	0	0	3	101	0	0	1	178	0	0	0	0	0	0	0	0	1	83	0	0
5:14738507-14741529	n/a		-	0	0	0	0	0	0	1	2	5	28	10	59	5	36	3	37	0	0	0	0	0	0	0	0	0	0	0	0	2	14	0	0	0	0	0	0
5:21945393-21945575	AT5G54070,AT5G54075,	2	-	0	0	0	0	15	35793	0	0	0	0	0	0	0	0	0	0	0	0	0	0	0	0	0	0	0	0	0	0	0	0	0	0	11	109009	0	0
Pt:55952-56098	ATCG00490,	1	+	0	0	0	0	10	1966367	10	1928726	0	0	0	0	0	0	0	0	0	0	0	0	0	0	0	0	0	0	0	0	0	0	0	0	6	828915	0	0
1:17237174-17237491	AT1G46480,	1	-	0	0	1	35	0	0	0	0	9	729	6	1415	4	733	4	988	0	0	0	0	0	0	0	0	0	0	0	0	0	0	0	0	1	125	0	0
1:17714178-17714347	n/a		+	1	0	2	1	0	0	0	0	2	0	2	1	0	0	0	0	0	0	2	0	0	0	2	0	0	0	0	0	4	2	9	2	0	0	1	1
3:20514580-20514863	AT3G55330,	2	-	0	0	2	1462	2	1269	0	0	0	0	0	0	0	0	0	0	1	234	2	692	0	0	3	1175	8	602	3	567	0	0	1	956	3	740	0	0
4:15100386-15100550	AT4G08425,	1	+	1	156	0	0	0	0	3	547	3	1015	0	0	4	3313	6	3795	0	0	0	0	0	0	0	0	0	0	0	0	0	0	0	0	8	2095	0	0
5:21990661-21990806	n/a		+	0	0	0	0	0	0	0	0	0	0	0	0	0	0	25	24826	0	0	0	0	0	0	0	0	0	0	0	0	0	0	0	0	0	0	0	0
5:26389498-26390136	AT5G65970,	4	-	0	0	0	0	0	0	0	0	4	333	11	592	6	1630	4	1873	0	0	0	0	0	0	0	0	0	0	0	0	0	0	0	0	0	0	0	0
5:6180209-6180926	AT5G18590,	4	-	4	114	0	0	0	0	0	0	0	0	0	0	1	41	0	0	0	0	1	131	3	67	2	256	0	0	2	108	0	0	4	239	3	196	5	178
1:382373-383130	AT1G02080,	3	+	0	0	0	0	2	253	4	287	4	392	3	803	0	0	2	993	0	0	0	0	0	0	1	317	0	0	2	148	1	193	1	390	3	405	1	435
2:19003840-19005985	n/a		-	0	0	3	463	0	0	3	340	0	0	1	1114	3	980	2	1178	0	0	4	169	0	0	2	326	0	0	1	144	0	0	1	804	2	544	2	468
3:19661249-19661940	AT3G53020,	3	-	0	0	0	0	0	0	0	0	5	2381	6	4347	3	3157	0	0	0	0	0	0	0	0	0	0	0	0	0	0	0	0	9	4026	1	2037	0	0
5:17620798-17621714	AT5G43822,	5	+	0	0	2	38	2	34	1	27	1	70	0	0	2	101	0	0	2	16	0	0	0	0	1	40	2	15	0	0	3	31	4	76	4	64	0	0
5:18663559-18663770	AT5G46020,	2	-	0	0	1	1700	2	1153	0	0	3	2730	7	5163	2	3484	3	4404	0	0	0	0	0	0	0	0	0	0	0	0	0	0	3	3283	1	2231	2	1742
5:3556066-3570004	n/a		+	0	0	2	752	0	0	0	0	0	0	9	1538	4	1294	0	0	0	0	0	0	0	0	0	0	0	0	0	0	0	0	9	1242	0	0	0	0
Pt:28218-28398	n/a		-	0	0	0	0	9	68938	9	65695	0	0	0	0	0	0	0	0	0	0	0	0	0	0	0	0	0	0	0	0	0	0	0	0	6	44280	0	0
Pt:40799-40991	ATCG00350,	1	+	0	0	3	144156	0	0	21	156982	0	0	0	0	0	0	0	0	0	0	0	0	0	0	0	0	0	0	0	0	0	0	0	0	0	0	0	0
2:13563446-13563811	AT2G31902,	2	+	0	0	0	0	0	0	0	0	2	233	2	387	7	445	7	571	0	0	1	31	0	0	0	0	0	0	0	0	0	0	2	206	2	123	0	0
3:16311825-16314011	n/a		+	0	0	0	0	0	0	1	0	2	85	5	111	4	81	3	93	0	0	0	0	0	0	0	0	0	0	0	0	0	0	1	16	4	14	3	10
3:19661319-19661926	AT3G53020,	3	-	0	0	0	0	0	0	0	0	0	0	0	0	0	0	13	4030	0	0	0	0	0	0	0	0	0	0	0	0	6	1865	0	0	0	0	4	2142
3:5195567-5195827	AT3G15380,	1	+	0	0	2	116	0	0	2	120	1	228	2	405	5	400	6	530	0	0	0	0	0	0	1	116	0	0	0	0	0	0	0	0	3	199	1	181
4:10957705-10958861	AT4G20300,	3	+	1	69	2	124	1	223	2	182	2	356	4	689	0	0	5	831	0	0	0	0	0	0	1	450	0	0	0	0	0	0	2	417	0	0	3	478
4:12553919-12554123	AT4G24190,	2	-	1	994	0	0	0	0	0	0	0	0	5	5959	4	3341	0	0	0	0	2	734	2	575	3	1750	0	0	0	0	0	0	0	0	3	3166	3	2758
4:18027008-18027385	AT4G38550,	1	+	0	0	0	0	0	0	0	0	0	0	0	0	0	0	0	0	0	0	0	0	0	0	23	3543	0	0	0	0	0	0	0	0	0	0	0	0
4:5389946-5405831	n/a		-	2	6	0	0	0	0	0	0	3	47	0	0	7	59	0	0	0	0	0	0	0	0	0	0	1	25	1	26	0	0	3	44	6	35	0	0
5:13831434-13831625	AT5G35630,	2	-	3	4649	6	11688	1	9053	0	0	0	0	0	0	0	0	0	0	2	2086	4	6366	1	3262	2	10432	0	0	0	0	0	0	3	6758	1	5074	0	0
5:15517283-15521015	n/a		+	0	0	0	0	1	9	0	0	1	34	3	62	3	62	5	87	0	0	0	0	0	0	1	1	0	0	0	0	3	12	0	0	3	22	3	19
5:23072415-23072808	AT5G57015,	3	+	0	0	2	122	0	0	1	146	1	190	0	0	1	381	2	448	0	0	2	116	0	0	2	264	1	85	0	0	0	0	6	314	4	327	1	270
2:1800184-1824100	n/a		-	3	11407	0	0	0	0	0	0	0	0	0	0	0	0	0	0	0	0	0	0	0	0	0	0	4	25740	5	22540	3	7375	0	0	7	13755	0	0
2:19004020-19006167	n/a		-	0	0	2	371	3	407	0	0	0	0	0	0	2	1169	3	1495	0	0	0	0	0	0	0	0	1	137	0	0	0	0	1	717	8	654	2	577
3:5399310-5399968	AT3G15950,	5	-	2	369	0	0	0	0	1	1122	7	2910	5	5233	4	2573	3	2931	0	0	0	0	0	0	0	0	0	0	0	0	0	0	0	0	0	0	0	0
5:21814034-21814179	AT5G53740,	1	-	0	0	0	0	0	0	0	0	0	0	0	0	0	0	12	11619	0	0	0	0	0	0	0	0	0	0	0	0	0	0	0	0	10	6863	0	0
5:2823669-2827414	n/a		+	0	0	0	0	3	1104	4	1065	0	0	2	1442	0	0	12	2916	0	0	0	0	0	0	0	0	0	0	0	0	0	0	1	1144	0	0	0	0
5:6569544-6569774	AT5G19473,	1	+	0	0	0	0	1	0	0	0	0	0	0	0	0	0	0	0	0	0	0	0	0	0	0	0	0	0	0	0	0	0	1	423	11	455	9	402
Pt:55106-55268	ATCG00490,	1	-	0	0	0	0	7	1325985	9	1324460	0	0	0	0	0	0	0	0	1	355661	0	0	0	0	0	0	0	0	4	1203826	0	0	0	0	0	0	1	507172
Pt:55106-56083	ATCG00490,	1	-	0	0	3	1926232	15	2068869	0	0	0	0	0	0	0	0	0	0	0	0	1	1783126	0	0	0	0	0	0	0	0	0	0	3	933126	0	0	0	0
1:10335034-10335285	AT1G29560,	1	+	3	5	0	0	1	5	0	0	3	20	4	81	1	34	4	45	0	0	0	0	0	0	0	0	0	0	0	0	2	11	2	39	1	9	0	0
1:14160677-14160909	AT1G37130,	1	-	0	0	0	0	3	1662	3	1563	0	0	1	836	6	2340	6	2852	2	403	0	0	0	0	0	0	0	0	0	0	0	0	0	0	0	0	0	0
1:16797905-16798293	AT1G44170,	2	-	0	0	0	0	0	0	0	0	5	565	2	898	6	818	2	910	0	0	0	0	0	0	0	0	0	0	0	0	1	399	0	0	4	952	1	818
1:27148720-27148905	AT1G72150,	1	+	0	0	0	0	0	0	0	0	1	3122	9	8880	0	0	0	0	0	0	4	3745	0	0	0	0	0	0	0	0	2	1558	5	3941	0	0	0	0
2:13139654-13139799	AT2G30860,	1	-	0	0	0	0	2	7707	1	7447	2	26261	3	39587	3	22001	5	29057	0	0	0	0	0	0	0	0	1	10795	3	11637	0	0	0	0	0	0	1	2292
3:10963899-10965636	n/a		-	0	0	0	0	0	0	0	0	2	16	5	21	4	28	0	0	1	0	0	0	0	0	0	0	0	0	0	0	1	4	1	10	5	14	2	7
3:19594771-19595020	AT3G52870,	2	-	0	0	0	0	0	0	1	214	0	0	2	609	2	650	0	0	0	0	0	0	2	83	10	283	0	0	2	189	1	298	0	0	0	0	1	525
4:11182528-11182806	AT4G20890,	2	+	1	432	2	1009	0	0	0	0	0	0	1	3723	3	2429	5	3188	2	236	0	0	0	0	0	0	0	0	0	0	0	0	0	0	4	1345	3	1082
4:11780302-11805227	n/a		-	0	0	0	0	2	40	3	36	0	0	0	0	16	95	0	0	0	0	0	0	0	0	0	0	0	0	0	0	0	0	0	0	0	0	0	0
4:13594255-13594466	AT4G27090,	2	-	0	0	0	0	0	0	0	0	0	0	10	20197	3	10680	0	0	0	0	1	2195	0	0	0	0	0	0	0	0	2	6871	5	16135	0	0	0	0
4:15267180-15267385	AT4G31480,	1	+	0	0	1	454	0	0	0	0	0	0	2	1838	6	1485	4	1851	4	59	0	0	0	0	0	0	0	0	0	0	0	0	2	1024	2	809	0	0
4:2442403-2446608	n/a		+	0	0	0	0	0	0	0	0	5	1147	2	1194	5	3131	6	4086	0	0	0	0	0	0	3	515	0	0	0	0	0	0	0	0	0	0	0	0
5:6598597-6599463	AT5G19550,	5	+	0	0	0	0	2	401	2	386	3	745	0	0	5	2053	6	2579	0	0	0	0	0	0	2	324	0	0	0	0	0	0	0	0	1	595	0	0
1:30373643-30373879	AT1G80830,	1	-	0	0	1	156	0	0	0	0	5	527	1	825	0	0	0	0	1	71	1	155	1	85	0	0	0	0	0	0	0	0	4	224	4	315	2	325
1:6891713-6893236	AT1G19860,	3	-	0	0	3	64	0	0	3	80	0	0	0	0	3	113	1	141	0	0	4	52	1	31	1	130	1	30	1	34	0	0	0	0	1	150	1	135
2:12592989-12597812	n/a		+	0	0	3	152	1	194	0	0	0	0	0	0	0	0	0	0	0	0	3	146	2	85	0	0	0	0	0	0	1	355	4	582	3	695	3	567
2:1282343-1282531	AT2G04030,	2	+	0	0	0	0	4	713	2	768	0	0	0	0	3	358	2	414	0	0	0	0	0	0	0	0	0	0	1	258	2	607	1	1032	5	812	0	0
5:13710656-13710916	AT5G35530,	2	-	0	0	0	0	0	0	2	1339	2	2619	2	4805	0	0	8	4154	0	0	0	0	0	0	0	0	1	584	0	0	0	0	4	3867	0	0	1	2144
5:21945425-21990806	n/a		+	0	0	0	0	0	0	3	23910	0	0	0	0	9	48447	0	0	0	0	0	0	0	0	0	0	0	0	0	0	0	0	0	0	8	76506	0	0
5:4653717-4653899	AT5G14430,	1	+	0	0	0	0	3	366	0	0	1	414	5	564	0	0	3	794	0	0	0	0	0	0	2	501	1	160	0	0	1	307	0	0	3	382	1	334
1:11332779-11333248	AT1G31660,	2	-	0	0	0	0	0	0	0	0	4	225	0	0	4	430	3	542	0	0	0	0	0	0	2	133	2	78	1	54	0	0	0	0	3	314	0	0
1:11875443-11875803	AT1G32790,	3	-	0	0	0	0	3	292	3	253	1	291	2	423	1	816	4	961	0	0	1	169	0	0	3	220	0	0	0	0	0	0	1	318	0	0	0	0
1:19522247-19522449	AT1G52410,	2	+	5	52	2	167	0	0	0	0	0	0	0	0	0	0	0	0	2	61	0	0	0	0	0	0	0	0	0	0	0	0	0	0	10	916	0	0
1:19523719-19524061	AT1G52410,	3	+	0	0	0	0	0	0	0	0	2	564	0	0	8	939	0	0	0	0	0	0	0	0	0	0	0	0	0	0	6	484	3	1071	0	0	0	0
1:30090399-30090595	AT1G79990,	1	+	0	0	1	194	0	0	0	0	2	225	1	464	0	0	3	729	0	0	0	0	1	59	0	0	0	0	1	102	0	0	3	437	3	242	4	346
2:12994242-12994406	AT2G30490,	1	+	2	421	0	0	0	0	1	1040	10	5945	0	0	2	5832	0	0	0	0	0	0	0	0	0	0	0	0	0	0	0	0	2	1871	2	2669	0	0
2:15502884-15503084	AT2G36910,	1	+	0	0	0	0	1	277	0	0	2	869	5	1378	0	0	2	1822	0	0	0	0	0	0	1	345	0	0	0	0	0	0	1	1303	7	1201	0	0
4:6478903-6479095	AT4G10480,	2	-	0	0	0	0	0	0	0	0	0	0	0	0	2	1636	4	2091	0	0	1	525	1	336	8	1050	0	0	0	0	1	1516	0	0	0	0	2	1383
4:8689979-8698223	n/a		+	0	0	0	0	7	20	1	24	0	0	0	0	2	18	4	14	0	0	0	0	2	2	1	6	0	0	2	10	0	0	0	0	0	0	0	0
5:26092437-26092835	AT5G65290,	2	+	0	0	1	52	1	32	1	56	1	99	6	233	2	152	1	206	0	0	0	0	1	38	1	109	0	0	1	41	0	0	2	120	1	114	0	0
5:3074094-3074269	AT5G09870,	1	+	0	0	3	362	0	0	0	0	0	0	1	993	2	717	0	0	0	0	0	0	0	0	1	810	1	360	2	329	1	351	5	598	2	727	1	664
5:3555624-3568983	n/a		+	0	0	0	0	0	0	0	0	0	0	0	0	0	0	19	1909	0	0	0	0	0	0	0	0	0	0	0	0	0	0	0	0	0	0	0	0
Pt:6637-41466	n/a		-	11	24064	5	56082	0	0	0	0	0	0	0	0	0	0	0	0	0	0	0	0	0	0	0	0	0	0	0	0	0	0	3	26991	0	0	0	0
1:12195268-12196514	AT1G33615,	3	-	0	0	0	0	0	0	0	0	0	0	1	180	5	169	4	187	0	0	0	0	0	0	3	10	3	4	1	2	0	0	0	0	0	0	1	32
1:27148959-27149101	AT1G72150,	1	-	0	0	0	0	0	0	0	0	0	0	5	7437	0	0	0	0	0	0	1	3559	0	0	12	12332	0	0	0	0	0	0	0	0	0	0	0	0
1:3469656-3469837	AT1G10522,	1	+	0	0	0	0	2	8793	5	9356	0	0	0	0	0	0	1	15401	0	0	0	0	0	0	0	0	0	0	0	0	0	0	0	0	4	24112	6	16628
1:8335056-8335303	AT1G23480,	1	+	0	0	1	149	2	329	1	341	6	190	2	314	2	301	0	0	0	0	0	0	0	0	0	0	0	0	1	116	0	0	1	134	0	0	2	68
2:14530097-14530489	AT2G34460,	1	+	0	0	1	391	4	791	0	0	0	0	0	0	0	0	0	0	0	0	3	339	0	0	3	704	4	370	1	360	0	0	0	0	2	819	0	0
5:19348568-19349055	AT5G47780,	2	+	0	0	0	0	0	0	0	0	1	358	0	0	2	592	2	753	0	0	0	0	2	168	6	555	1	249	0	0	0	0	0	0	2	362	2	409
Pt:40918-41088	ATCG00350,	1	-	0	0	0	0	18	118090	0	0	0	0	0	0	0	0	0	0	0	0	0	0	0	0	0	0	0	0	0	0	0	0	0	0	0	0	0	0
Pt:54901-55064	n/a		-	0	0	0	0	7	1299170	6	1245493	0	0	0	0	0	0	0	0	0	0	0	0	0	0	0	0	0	0	0	0	0	0	0	0	5	534737	0	0
Pt:616-764	ATCG00020,	1	+	0	0	0	0	6	9212368	9	8221002	0	0	0	0	0	0	0	0	3	2450970	0	0	0	0	0	0	0	0	0	0	0	0	0	0	0	0	0	0
Pt:844-39840	n/a		-	0	0	0	0	6	4200376	12	3793841	0	0	0	0	0	0	0	0	0	0	0	0	0	0	0	0	0	0	0	0	0	0	0	0	0	0	0	0
1:12170651-12170856	AT1G33560,	1	+	0	0	1	31	1	59	0	0	2	195	3	389	2	344	2	438	0	0	1	46	0	0	0	0	1	28	0	0	0	0	0	0	2	116	2	98
1:17179610-17179940	AT1G45474,	2	+	0	0	3	1009	1	1231	3	1046	0	0	0	0	0	0	0	0	0	0	1	783	0	0	0	0	1	845	0	0	0	0	1	692	3	951	4	767
1:17903957-17904292	AT1G48430,	2	-	0	0	0	0	1	78	0	0	1	226	1	441	0	0	2	518	0	0	0	0	2	158	3	411	2	75	0	0	0	0	2	126	1	73	2	107
1:19410583-19410908	AT1G52150,	1	-	0	0	1	137	0	0	0	0	5	858	2	1575	2	1133	0	0	0	0	0	0	0	0	2	199	0	0	0	0	3	175	0	0	0	0	2	208
1:20062464-20063011	AT1G53730,	4	+	0	0	2	206	1	352	2	316	2	378	3	758	0	0	2	598	0	0	1	79	0	0	0	0	0	0	0	0	2	113	1	223	0	0	1	170
1:5239295-5239650	AT1G15215,	2	+	2	19	0	0	0	0	0	0	1	98	2	184	2	143	4	232	0	0	0	0	0	0	2	147	0	0	0	0	1	45	2	109	1	88	0	0
1:7144829-7148060	n/a		+	0	0	0	0	0	0	0	0	0	0	0	0	8	19388	0	0	0	0	0	0	0	0	5	25752	0	0	1	10350	0	0	2	4663	1	2578	0	0
2:13635786-13636332	AT2G32040,	3	+	1	62	0	0	2	137	0	0	1	111	7	182	0	0	1	224	0	0	0	0	0	0	1	146	0	0	0	0	0	0	3	168	0	0	1	131
3:16125802-16126427	AT3G44540,	3	+	0	0	0	0	0	0	0	0	0	0	4	535	4	250	6	305	0	0	0	0	0	0	0	0	0	0	0	0	1	26	0	0	1	39	1	27
3:17732972-17742518	n/a		+	1	13	1	31	0	0	1	29	3	84	5	144	1	97	0	0	0	0	0	0	0	0	3	27	0	0	0	0	0	0	0	0	0	0	2	37
3:3624026-3624206	AT3G11510,	2	-	0	0	0	0	0	0	2	3155	0	0	0	0	6	6326	4	7827	0	0	0	0	0	0	0	0	0	0	0	0	0	0	0	0	5	5600	0	0
4:18540249-18540526	AT4G39980,	1	+	0	0	0	0	0	0	0	0	4	1934	1	2766	4	4348	4	5560	0	0	0	0	0	0	0	0	0	0	1	745	1	352	0	0	2	409	0	0
5:21888310-21888507	AT5G53902,	1	+	0	0	0	0	0	0	0	0	0	0	0	0	5	4514	6	4254	0	0	0	0	0	0	0	0	0	0	0	0	0	0	0	0	6	5113	0	0
5:5576995-5585679	n/a		-	0	0	0	0	0	0	10	299	0	0	0	0	1	140	1	153	0	0	0	0	0	0	0	0	0	0	0	0	0	0	0	0	3	128	2	107
5:693224-693414	AT5G02960,	1	-	1	2474	0	0	0	0	2	3820	2	5477	0	0	2	7330	3	8808	0	0	0	0	0	0	0	0	0	0	0	0	1	4512	2	9247	0	0	4	5374
Pt:51202-51472	ATCG00450,	1	+	0	0	1	96655	4	108195	7	99931	0	0	0	0	0	0	2	7425	0	0	0	0	0	0	0	0	0	0	0	0	1	34611	0	0	2	65751	0	0
1:11875443-11875789	AT1G32790,	3	-	0	0	2	266	1	494	0	0	0	0	1	806	7	1264	4	1531	0	0	0	0	0	0	0	0	0	0	0	0	0	0	0	0	1	855	0	0
1:28958745-28959371	AT1G77080,	2	+	0	0	0	0	1	284	1	245	0	0	1	1055	1	1130	2	1413	0	0	1	209	1	207	0	0	0	0	1	160	2	369	1	690	2	768	2	632
1:30349032-30349921	AT1G80750,	3	+	0	0	0	0	0	0	0	0	2	571	1	830	0	0	1	1044	2	27	0	0	0	0	3	137	2	66	0	0	1	366	0	0	3	439	1	420
2:10321651-10321821	AT2G24260,	1	-	1	15	0	0	0	0	2	26	5	250	3	386	2	425	2	551	0	0	0	0	0	0	0	0	0	0	0	0	0	0	1	50	0	0	0	0
2:18026359-18029348	AT2G43410,	4	-	0	0	2	93	0	0	2	137	0	0	1	201	5	207	3	277	0	0	0	0	0	0	0	0	0	0	0	0	0	0	1	178	2	181	0	0
3:22525897-22598919	n/a		+	0	0	0	0	0	0	0	0	0	0	0	0	5	250	5	326	0	0	0	0	0	0	0	0	0	0	0	0	0	0	0	0	6	226	0	0
3:3490276-3490475	AT3G11130,	2	-	0	0	1	518	0	0	0	0	3	1165	0	0	3	2459	5	3102	1	104	0	0	0	0	0	0	0	0	0	0	0	0	0	0	0	0	3	1115
3:5400193-5400702	AT3G15950,	4	-	0	0	0	0	0	0	0	0	0	0	16	8892	0	0	0	0	0	0	0	0	0	0	0	0	0	0	0	0	0	0	0	0	0	0	0	0
4:15969248-15969651	AT4G33090,	2	-	1	232	2	542	2	458	0	0	0	0	3	1187	1	968	1	1156	0	0	0	0	0	0	0	0	1	359	0	0	0	0	1	1036	2	952	2	958
4:18234801-18235749	AT4G39150,	4	-	0	0	2	399	1	336	0	0	1	462	3	770	4	509	1	683	0	0	0	0	0	0	0	0	0	0	0	0	0	0	1	640	3	555	0	0
4:6698520-6698847	AT4G10920,	2	-	0	0	3	591	0	0	0	0	3	381	3	824	0	0	0	0	0	0	0	0	0	0	0	0	0	0	0	0	0	0	6	1110	1	643	0	0
5:17580616-17580848	AT5G43750,	2	-	0	0	0	0	0	0	0	0	0	0	0	0	0	0	0	0	0	0	0	0	4	785	6	2366	2	883	2	777	1	409	1	661	0	0	0	0
5:5210223-5212022	n/a		+	0	0	0	0	3	1271	0	0	0	0	0	0	0	0	0	0	0	0	0	0	3	7888	0	0	4	6325	3	5500	3	1306	0	0	0	0	0	0
Pt:55094-56071	ATCG00490,	1	-	3	946823	4	1915986	0	0	0	0	0	0	0	0	0	0	0	0	2	590184	5	1774028	0	0	0	0	0	0	0	0	0	0	2	929090	0	0	0	0
Pt:55794-55954	ATCG00490,	1	+	4	825705	8	1906494	0	0	0	0	0	0	0	0	0	0	0	0	0	0	0	0	0	0	0	0	0	0	0	0	4	472745	0	0	0	0	0	0
Pt:55949-56098	ATCG00490,	1	+	0	0	0	0	0	0	0	0	0	0	0	0	0	0	0	0	0	0	0	0	0	0	0	0	0	0	0	0	0	0	1	828547	15	833264	0	0
1:12381927-12384363	n/a		-	0	0	0	0	2	7	1	7	0	0	2	81	1	74	1	79	0	0	0	0	0	0	0	0	1	1	0	0	1	13	0	0	3	25	3	20
1:19524145-19524326	AT1G52410,	2	+	0	0	0	0	0	0	0	0	0	0	0	0	10	729	0	0	0	0	0	0	0	0	0	0	1	155	0	0	0	0	0	0	4	655	0	0
1:2206339-2206518	AT1G07180,	1	+	1	71	2	133	1	289	2	299	0	0	0	0	0	0	0	0	1	52	1	176	1	132	6	418	0	0	0	0	0	0	0	0	0	0	0	0
1:22338467-22338683	AT1G60640,	2	-	0	0	2	288	0	0	0	0	0	0	0	0	0	0	0	0	0	0	0	0	0	0	2	168	1	41	1	34	0	0	0	0	3	220	6	164
1:22665289-22705416	n/a		-	1	4	2	12	0	0	0	0	0	0	2	60	0	0	0	0	0	0	1	12	0	0	3	21	0	0	3	7	1	5	1	23	0	0	1	8
1:27847591-27850188	n/a		-	0	0	4	3066	0	0	0	0	0	0	0	0	0	0	0	0	0	0	0	0	0	0	0	0	0	0	0	0	0	0	0	0	0	0	11	2447
1:28587466-28587600	AT1G76180,	1	-	0	0	0	0	0	0	0	0	0	0	0	0	3	20448	5	25637	0	0	0	0	0	0	0	0	0	0	0	0	0	0	0	0	5	20615	2	16354
1:29861644-29861927	AT1G79380,	2	+	0	0	0	0	2	298	2	308	0	0	1	1071	4	779	1	1001	1	137	1	376	1	298	0	0	1	209	0	0	0	0	1	447	0	0	0	0
1:5606911-5610218	n/a		+	0	0	1	286	0	0	0	0	0	0	0	0	0	0	0	0	0	0	0	0	2	605	5	1980	4	893	3	807	0	0	0	0	0	0	0	0
1:9067152-9069092	AT1G26208,	2	-	0	0	0	0	0	0	0	0	0	0	0	0	7	59	8	91	0	0	0	0	0	0	0	0	0	0	0	0	0	0	0	0	0	0	0	0
2:13139603-13141768	n/a		+	0	0	0	0	0	0	0	0	0	0	8	18411	0	0	5	19669	0	0	0	0	0	0	0	0	2	4631	0	0	0	0	0	0	0	0	0	0
2:17224556-17224704	AT2G41310,AT2G09250,	1	+	0	0	0	0	0	0	0	0	0	0	0	0	0	0	0	0	0	0	0	0	0	0	0	0	0	0	0	0	0	0	0	0	0	0	15	483930
3:10033829-10034530	n/a		-	1	0	0	0	0	0	0	0	1	4	0	0	0	0	2	13	0	0	0	0	0	0	0	0	0	0	0	0	3	3	2	11	3	16	3	11
3:10960286-10968617	n/a		-	0	0	0	0	0	0	0	0	5	2653	0	0	0	0	10	4801	0	0	0	0	0	0	0	0	0	0	0	0	0	0	0	0	0	0	0	0
3:11192569-11192707	AT3G29240,	1	+	0	0	2	1273	0	0	2	1192	2	507	2	1142	0	0	0	0	0	0	0	0	0	0	1	1862	0	0	0	0	0	0	2	2197	2	1566	2	1176
3:17447395-17447783	AT3G47350,	2	+	0	0	0	0	0	0	0	0	0	0	0	0	4	4	3	4	0	0	0	0	0	0	0	0	0	0	0	0	1	338	0	0	5	615	2	409
3:4820191-4823247	n/a		+	0	0	0	0	10	4271	0	0	0	0	0	0	0	0	0	0	0	0	0	0	1	1672	4	5188	0	0	0	0	0	0	0	0	0	0	0	0
3:5400054-5400558	AT3G15950,	4	-	0	0	2	728	0	0	0	0	0	0	0	0	6	2526	7	2788	0	0	0	0	0	0	0	0	0	0	0	0	0	0	0	0	0	0	0	0
3:5400946-5401145	AT3G15950,	2	-	0	0	2	753	0	0	11	1104	0	0	0	0	0	0	2	2958	0	0	0	0	0	0	0	0	0	0	0	0	0	0	0	0	0	0	0	0
3:5544384-5544758	AT3G16340,	1	+	0	0	0	0	0	0	0	0	4	892	5	1512	2	848	3	1086	0	0	0	0	0	0	0	0	0	0	0	0	0	0	0	0	1	117	0	0
3:9495096-9495354	AT3G25940,	2	+	0	0	0	0	0	0	0	0	1	130	4	180	2	223	3	245	2	7	0	0	0	0	1	36	0	0	0	0	0	0	0	0	1	143	1	133
4:14203032-14203225	AT4G28750,	2	-	0	0	3	13287	0	0	0	0	0	0	0	0	0	0	0	0	0	0	5	16875	0	0	0	0	2	23304	0	0	0	0	3	6558	0	0	2	4201
4:17803487-17803640	AT4G37870,	1	-	0	0	0	0	0	0	0	0	0	0	0	0	8	12114	7	15549	0	0	0	0	0	0	0	0	0	0	0	0	0	0	0	0	0	0	0	0
5:21811769-21811914	AT5G53740,	1	-	0	0	1	6753	13	14991	0	0	0	0	0	0	0	0	0	0	0	0	0	0	0	0	0	0	0	0	0	0	1	5857	0	0	0	0	0	0
5:25181869-25184894	n/a		+	0	0	0	0	0	0	0	0	0	0	0	0	0	0	0	0	0	0	0	0	0	0	0	0	0	0	0	0	6	1625	0	0	0	0	9	2250
1:10832906-10833429	AT1G30580,	3	-	1	550	2	1212	1	853	0	0	1	2094	3	3244	2	2659	0	0	0	0	1	438	0	0	0	0	0	0	0	0	0	0	0	0	3	1562	0	0
1:11778554-11780227	n/a		+	3	19	0	0	1	19	0	0	1	198	0	0	1	135	0	0	0	0	0	0	0	0	0	0	2	6	0	0	0	0	4	75	2	57	0	0
1:12012137-12024022	n/a		+	0	0	0	0	0	0	0	0	0	0	0	0	0	0	0	0	0	0	0	0	0	0	0	0	0	0	0	0	0	0	0	0	14	4208	0	0
1:17126777-17127488	AT1G45201,	2	+	1	408	0	0	0	0	2	701	1	2082	0	0	8	1769	0	0	0	0	1	337	0	0	0	0	0	0	1	1021	0	0	0	0	0	0	0	0
1:19522712-19522926	AT1G52410,	2	+	0	0	0	0	0	0	0	0	2	737	0	0	0	0	4	1164	0	0	0	0	0	0	0	0	2	239	0	0	2	644	4	1426	0	0	0	0
1:19522712-19523501	AT1G52410,	6	+	0	0	0	0	0	0	0	0	8	746	6	1676	0	0	0	0	0	0	0	0	0	0	0	0	0	0	0	0	0	0	0	0	0	0	0	0
1:20310394-20310540	AT1G54410,	1	-	0	0	0	0	0	0	0	0	0	0	0	0	0	0	0	0	0	0	0	0	0	0	0	0	9	16074	0	0	0	0	0	0	5	6357	0	0
1:24048040-24048196	AT1G64720,	1	-	1	592	2	1107	0	0	1	2751	1	292	0	0	0	0	0	0	1	881	1	3965	1	2099	0	0	1	1581	1	1403	1	745	1	1375	1	1321	1	1526
1:3443417-3443609	AT1G10470,	2	-	0	0	0	0	2	790	0	0	0	0	0	0	3	1724	4	2113	0	0	2	609	0	0	0	0	0	0	0	0	1	304	2	542	0	0	0	0
1:8323451-8324050	AT1G23440,	3	+	0	0	0	0	0	0	0	0	0	0	4	846	1	649	6	838	0	0	1	243	0	0	1	479	0	0	0	0	0	0	0	0	1	668	0	0
2:19600137-19601439	AT2G47860,	1	+	0	0	0	0	0	0	0	0	2	284	4	455	5	594	3	690	0	0	0	0	0	0	0	0	0	0	0	0	0	0	0	0	0	0	0	0
2:7244815-7245074	AT2G16700,	1	+	1	99	0	0	0	0	1	129	3	920	1	1537	5	1280	3	1827	0	0	0	0	0	0	0	0	0	0	0	0	0	0	0	0	0	0	0	0
3:1621814-1622008	AT3G05590,	2	+	0	0	0	0	0	0	3	2544	0	0	0	0	6	5025	5	5922	0	0	0	0	0	0	0	0	0	0	0	0	0	0	0	0	0	0	0	0
3:4283022-4283777	n/a		+	3	33	0	0	1	86	0	0	0	0	1	171	2	139	2	177	0	0	2	89	1	53	0	0	1	37	0	0	0	0	0	0	1	114	0	0
4:15642295-15642463	AT4G32410,	2	-	0	0	2	619	0	0	2	566	2	1242	0	0	0	0	6	1996	0	0	0	0	0	0	0	0	0	0	0	0	0	0	0	0	0	0	2	695
4:16311056-16311280	AT4G34050,	1	+	0	0	0	0	0	0	0	0	1	10139	4	16122	3	10407	4	12885	0	0	0	0	0	0	2	3166	0	0	0	0	0	0	0	0	0	0	0	0
4:2634783-2653070	n/a		-	0	0	0	0	2	40	0	0	2	7	0	0	2	35	1	41	0	0	0	0	0	0	0	0	0	0	0	0	0	0	0	0	4	83	3	67
4:4977-5588	AT4G00020,	2	-	0	0	0	0	0	0	0	0	0	0	2	99	0	0	1	117	0	0	0	0	0	0	7	26	1	11	0	0	1	39	0	0	1	53	1	46
4:9186653-9188212	n/a		+	0	0	0	0	0	0	0	0	0	0	0	0	4	26	10	34	0	0	0	0	0	0	0	0	0	0	0	0	0	0	0	0	0	0	0	0
5:15023284-15023598	AT5G37793,	1	+	1	10	0	0	0	0	0	0	2	71	2	114	1	87	2	104	0	0	0	0	0	0	0	0	1	0	0	0	0	0	3	39	1	40	1	41
5:18424994-18426001	AT5G45472,	2	+	1	28	2	74	2	52	0	0	0	0	0	0	0	0	0	0	0	0	2	64	0	0	0	0	0	0	0	0	0	0	0	0	6	54	1	75
5:21811769-21811951	AT5G53740,	1	-	0	0	0	0	0	0	2	10319	0	0	0	0	0	0	3	60344	0	0	0	0	0	0	0	0	0	0	0	0	0	0	0	0	4	30900	5	21845
5:21945393-21945589	AT5G54070,AT5G54075,	2	-	0	0	0	0	0	0	4	1502	0	0	0	0	0	0	0	0	0	0	0	0	0	0	0	0	0	0	0	0	0	0	0	0	6	4634	4	3251
5:25183347-25186373	n/a		+	0	0	0	0	0	0	0	0	14	4655	0	0	0	0	0	0	0	0	0	0	0	0	0	0	0	0	0	0	0	0	0	0	0	0	0	0
5:7608197-7614434	n/a		+	0	0	0	0	0	0	1	24	1	34	4	92	2	54	1	65	0	0	0	0	2	6	0	0	0	0	1	7	0	0	1	35	0	0	1	50
Pt:39983-40124	ATCG00350,	1	-	0	0	0	0	8	101173	0	0	0	0	0	0	1	3362	0	0	0	0	0	0	0	0	0	0	0	0	0	0	0	0	0	0	5	40747	0	0
1:10498524-10499244	AT1G29965,AT1G29970,	3	-	0	0	1	244	0	0	0	0	2	112	1	341	2	275	3	286	0	0	0	0	0	0	0	0	0	0	0	0	0	0	0	0	2	250	2	258
1:12196286-12198853	n/a		-	0	0	0	0	1	25	0	0	0	0	0	0	4	152	0	0	0	0	4	17	2	6	0	0	0	0	1	8	0	0	0	0	0	0	1	57
1:12197021-12199173	n/a		-	0	0	0	0	1	6	1	10	0	0	6	154	1	131	0	0	0	0	0	0	0	0	0	0	0	0	0	0	0	0	0	0	3	23	1	13
1:14160668-14160909	AT1G37130,	1	-	0	0	0	0	0	0	0	0	0	0	0	0	6	2467	6	3012	0	0	0	0	0	0	1	3025	0	0	0	0	0	0	0	0	0	0	0	0
1:18067174-18067619	AT1G48850,	3	-	1	202	0	0	0	0	0	0	2	827	2	1265	2	1415	2	1792	0	0	1	172	0	0	0	0	0	0	0	0	0	0	0	0	1	848	2	652
1:19522858-19523642	AT1G52410,	6	+	0	0	0	0	0	0	0	0	3	801	2	1709	0	0	4	1337	0	0	0	0	0	0	0	0	0	0	0	0	0	0	4	1550	0	0	0	0
1:19523310-19523501	AT1G52410,	2	+	0	0	0	0	0	0	0	0	0	0	4	958	9	812	0	0	0	0	0	0	0	0	0	0	0	0	0	0	0	0	0	0	0	0	0	0
1:23457451-23457750	AT1G63240,	2	-	0	0	0	0	0	0	0	0	0	0	1	147	1	135	0	0	0	0	0	0	1	69	2	203	1	55	0	0	1	123	5	285	1	202	0	0
1:24047621-24047963	AT1G64720,	2	-	0	0	1	1380	0	0	2	2124	0	0	0	0	0	0	0	0	1	962	2	5132	0	0	0	0	0	0	1	1427	2	736	3	1551	0	0	1	1040
1:27541297-27541842	AT1G73230,	2	-	1	606	0	0	0	0	4	785	0	0	0	0	0	0	5	1568	0	0	0	0	0	0	0	0	0	0	0	0	0	0	0	0	0	0	3	886
1:296495-296700	AT1G01820,	2	-	1	140	2	370	0	0	0	0	4	452	5	1130	0	0	0	0	0	0	0	0	0	0	0	0	0	0	0	0	0	0	1	529	0	0	0	0
1:5414136-5414282	AT1G15740,	1	+	0	0	1	251	0	0	1	281	0	0	3	1361	1	995	1	1343	0	0	1	539	1	393	3	1150	0	0	0	0	0	0	1	493	0	0	0	0
1:626807-626983	AT1G02840,	2	+	0	0	0	0	0	0	0	0	0	0	0	0	0	0	10	1024	0	0	0	0	0	0	0	0	0	0	0	0	0	0	0	0	3	485	0	0
1:9670307-9670619	AT1G27760,	1	+	0	0	2	108	0	0	0	0	0	0	0	0	1	441	8	518	0	0	0	0	0	0	2	277	0	0	0	0	0	0	0	0	0	0	0	0
2:19193448-19194652	AT2G46710,	4	+	0	0	0	0	1	250	1	253	0	0	2	854	0	0	5	1213	0	0	0	0	0	0	3	254	0	0	0	0	0	0	0	0	1	379	0	0
2:206522-206831	AT2G01460,	2	+	0	0	0	0	0	0	1	58	0	0	5	278	0	0	3	308	0	0	0	0	1	24	0	0	0	0	1	18	0	0	1	237	1	247	0	0
3:16805926-16806440	AT3G45770,	3	-	0	0	1	140	0	0	0	0	4	201	4	317	1	435	0	0	0	0	0	0	2	106	0	0	0	0	0	0	0	0	0	0	1	188	0	0
3:17168045-17169296	n/a		-	0	0	0	0	0	0	0	0	5	37	7	51	0	0	0	0	0	0	0	0	0	0	0	0	1	0	0	0	0	0	0	0	0	0	0	0
3:21929798-21931203	AT3G59340,	7	-	0	0	0	0	1	5	2	5	2	19	3	52	2	9	3	31	0	0	0	0	0	0	0	0	0	0	0	0	0	0	0	0	0	0	0	0
3:23412447-23413001	AT3G63400,	4	+	0	0	1	122	0	0	0	0	1	210	3	311	0	0	3	387	0	0	0	0	0	0	1	100	0	0	1	75	0	0	1	221	2	158	0	0
3:2841474-2841896	AT3G09260,	2	-	0	0	0	0	0	0	0	0	6	41089	4	68354	2	24779	1	32688	0	0	0	0	0	0	0	0	0	0	0	0	0	0	0	0	0	0	0	0
3:2841988-2842190	AT3G09260,	1	-	0	0	0	0	2	7148	0	0	4	40398	1	60158	2	22466	4	28898	0	0	0	0	0	0	0	0	0	0	0	0	0	0	0	0	0	0	0	0
3:4818903-4821940	n/a		+	2	2406	0	0	0	0	7	4980	0	0	0	0	0	0	0	0	0	0	0	0	0	0	0	0	0	0	0	0	0	0	0	0	4	3244	0	0
3:5399469-5399968	AT3G15950,	4	-	0	0	1	542	0	0	0	0	1	2634	4	4632	1	2473	6	2784	0	0	0	0	0	0	0	0	0	0	0	0	0	0	0	0	0	0	0	0
4:14961224-14961558	AT4G30690,	3	+	0	0	0	0	2	624	2	505	0	0	0	0	0	0	0	0	0	0	0	0	0	0	3	1900	3	370	1	370	0	0	0	0	2	312	0	0
4:6409264-6409398	AT4G10340,	1	+	2	24998	0	0	0	0	0	0	0	0	0	0	0	0	0	0	6	21237	0	0	0	0	0	0	0	0	0	0	0	0	3	22521	0	0	2	17791
4:6664265-6664511	n/a		+	0	0	0	0	0	0	1	19	0	0	0	0	4	85	3	136	0	0	0	0	0	0	1	18	0	0	0	0	0	0	0	0	3	69	1	42
5:15023284-15025974	n/a		+	0	0	0	0	0	0	1	15	5	88	0	0	3	109	0	0	0	0	1	5	0	0	0	0	0	0	0	0	0	0	3	47	0	0	0	0
5:18770049-18770268	AT5G46280,	1	-	0	0	0	0	1	102	0	0	0	0	4	244	0	0	4	280	0	0	0	0	0	0	0	0	0	0	1	38	1	105	0	0	2	191	0	0
5:21814034-21945538	n/a		-	0	0	0	0	0	0	0	0	0	0	0	0	0	0	0	0	0	0	0	0	0	0	0	0	0	0	0	0	0	0	0	0	0	0	13	109344
5:21888361-21990806	n/a		+	0	0	0	0	0	0	0	0	0	0	0	0	0	0	0	0	0	0	0	0	0	0	0	0	0	0	0	0	0	0	0	0	13	140229	0	0
5:22038648-22038809	AT5G54270,	1	+	0	0	4	26616	0	0	2	50585	0	0	0	0	0	0	0	0	0	0	1	36433	0	0	2	91725	0	0	3	40406	1	11549	0	0	0	0	0	0
5:23072415-23072662	AT5G57015,	2	+	1	68	0	0	0	0	1	139	2	219	3	438	0	0	0	0	0	0	1	125	0	0	0	0	3	94	0	0	1	168	0	0	1	313	0	0
5:23231371-23231552	AT5G57350,	1	-	0	0	0	0	0	0	0	0	2	405	0	0	0	0	4	787	0	0	1	1285	0	0	3	3491	0	0	0	0	0	0	0	0	0	0	3	1374
5:24297668-24300283	AT5G60410,	6	+	0	0	0	0	0	0	0	0	1	338	2	602	0	0	0	0	0	0	0	0	3	168	4	559	0	0	1	188	0	0	2	383	0	0	0	0
5:25053391-25053540	AT5G62390,	1	-	0	0	0	0	0	0	0	0	2	1162	4	4134	4	1156	0	0	0	0	0	0	3	200	0	0	0	0	0	0	0	0	0	0	0	0	0	0
5:252762-252968	AT5G01670,	1	+	1	11	0	0	0	0	0	0	1	117	1	156	2	146	6	232	0	0	0	0	0	0	0	0	0	0	0	0	0	0	0	0	2	66	0	0
5:5210433-5212560	n/a		+	0	0	0	0	0	0	0	0	1	924	0	0	0	0	0	0	0	0	4	12388	1	2543	2	7927	0	0	1	2119	0	0	1	2740	3	6486	0	0
5:7609581-7614434	n/a		+	2	12	0	0	0	0	1	15	0	0	3	73	3	53	2	49	0	0	0	0	0	0	0	0	0	0	0	0	0	0	0	0	1	28	1	35
Pt:34381-103870	n/a		+	0	0	13	212049	0	0	0	0	0	0	0	0	0	0	0	0	0	0	0	0	0	0	0	0	0	0	0	0	0	0	0	0	0	0	0	0
Pt:34384-55288	n/a		+	0	0	0	0	0	0	0	0	0	0	0	0	0	0	0	0	0	0	13	549607	0	0	0	0	0	0	0	0	0	0	0	0	0	0	0	0
1:11627720-11628041	AT1G32240,	2	-	0	0	0	0	1	20	0	0	1	79	0	0	2	193	4	201	0	0	0	0	0	0	2	28	0	0	0	0	0	0	0	0	1	100	1	114
1:12381927-12382809	n/a		-	2	4	0	0	3	3	0	0	0	0	0	0	2	60	0	0	0	0	0	0	0	0	0	0	0	0	0	0	1	5	1	14	3	11	0	0
1:13538090-13538278	AT1G36160,	1	+	0	0	1	168	0	0	1	285	0	0	0	0	2	411	2	473	0	0	0	0	0	0	0	0	0	0	0	0	2	217	0	0	4	718	0	0
1:1872226-1872888	AT1G06150,	3	-	1	31	0	0	1	65	0	0	1	179	2	362	1	249	2	260	0	0	0	0	0	0	1	88	2	30	0	0	0	0	1	143	0	0	0	0
1:19523871-19524061	AT1G52410,	2	+	0	0	0	0	0	0	0	0	0	0	0	0	0	0	10	890	0	0	0	0	0	0	0	0	0	0	2	262	0	0	0	0	0	0	0	0
1:19992256-19992794	AT1G53580,	3	-	0	0	0	0	1	381	0	0	1	1399	2	1866	2	1809	4	2376	0	0	0	0	0	0	0	0	0	0	0	0	0	0	0	0	2	1143	0	0
1:2707424-2707921	AT1G08550,	2	+	1	207	0	0	1	306	2	332	0	0	1	47	0	0	0	0	0	0	4	672	0	0	0	0	0	0	2	289	0	0	1	172	0	0	0	0
1:27296263-27296800	AT1G72500,	3	-	0	0	0	0	0	0	3	176	0	0	1	865	4	1163	1	1498	0	0	0	0	0	0	0	0	0	0	0	0	0	0	0	0	3	346	0	0
1:28512920-28513137	AT1G75940,	1	+	0	0	0	0	0	0	0	0	0	0	0	0	0	0	0	0	0	0	0	0	0	0	0	0	0	0	0	0	0	0	1	654	6	3491	5	2871
1:28587244-28587465	AT1G76180,	2	-	0	0	0	0	1	4069	0	0	2	21879	0	0	3	21061	0	0	0	0	1	13281	0	0	0	0	0	0	0	0	0	0	0	0	5	20996	0	0
1:30312632-30313101	AT1G80640,	2	+	3	93	1	245	2	204	3	193	0	0	1	329	0	0	0	0	0	0	0	0	0	0	1	307	0	0	0	0	0	0	0	0	1	274	0	0
1:5447607-5447747	AT1G15820,	1	-	0	0	2	6943	2	19486	0	0	0	0	0	0	0	0	0	0	2	4103	3	8386	0	0	0	0	0	0	0	0	0	0	0	0	3	6011	0	0
2:15502495-15502810	AT2G36910,	2	+	1	98	0	0	1	258	1	291	0	0	0	0	0	0	3	1866	0	0	1	190	0	0	0	0	1	111	2	129	1	595	0	0	0	0	1	1270
2:16880745-16881712	AT2G40430,	6	-	0	0	0	0	1	232	0	0	0	0	1	798	0	0	3	804	0	0	0	0	0	0	0	0	0	0	0	0	1	276	1	683	1	368	4	318
2:18347479-18355164	n/a		+	0	0	0	0	0	0	0	0	0	0	0	0	6	70	4	84	0	0	0	0	0	0	0	0	0	0	0	0	0	0	0	0	0	0	2	24
2:9107601-9108044	AT2G21270,	1	+	0	0	0	0	1	11	1	10	0	0	0	0	1	34	2	38	0	0	0	0	0	0	0	0	0	0	0	0	0	0	1	25	4	38	2	32
2:9782846-9789591	n/a		+	0	0	0	0	0	0	0	0	0	0	0	0	0	0	0	0	0	0	0	0	0	0	6	4789	2	1047	0	0	0	0	0	0	0	0	4	652
3:14230899-14232267	AT3G42050,	6	-	0	0	1	957	2	1180	2	1257	1	1076	1	1942	0	0	0	0	0	0	0	0	0	0	0	0	2	523	1	532	0	0	2	1433	0	0	0	0
3:18285489-18285704	AT3G49310,	1	-	0	0	0	0	0	0	3	117	0	0	1	400	0	0	1	682	0	0	0	0	0	0	0	0	0	0	0	0	2	153	0	0	3	359	2	284
3:2591797-2592049	AT3G08530,	2	-	0	0	0	0	1	651	2	734	0	0	0	0	0	0	3	2932	0	0	0	0	0	0	0	0	0	0	0	0	0	0	0	0	4	1272	2	1343
3:4523171-4523682	AT3G13772,	3	-	0	0	1	297	0	0	0	0	0	0	4	1775	3	1269	1	1683	0	0	0	0	0	0	1	347	0	0	0	0	0	0	0	0	0	0	2	591
3:5399180-5399968	AT3G15950,	6	-	0	0	0	0	6	1171	0	0	0	0	0	0	6	2685	0	0	0	0	0	0	0	0	0	0	0	0	0	0	0	0	0	0	0	0	0	0
3:5399770-5399968	AT3G15950,	2	-	0	0	0	0	5	979	0	0	0	0	0	0	7	2292	0	0	0	0	0	0	0	0	0	0	0	0	0	0	0	0	0	0	0	0	0	0
3:8727548-8727758	AT3G24160,	2	-	0	0	1	1135	0	0	0	0	4	1885	0	0	1	1815	0	0	0	0	2	990	0	0	0	0	0	0	0	0	0	0	0	0	4	1368	0	0
3:9404579-9407209	n/a		+	0	0	0	0	2	476	0	0	0	0	0	0	0	0	0	0	0	0	2	995	0	0	3	3436	2	3142	3	3195	0	0	0	0	0	0	0	0
4:14648755-14649315	AT4G29940,	3	-	0	0	0	0	0	0	0	0	0	0	9	219	3	100	0	0	0	0	0	0	0	0	0	0	0	0	0	0	0	0	0	0	0	0	0	0
4:5239826-5240072	AT4G08290,	1	+	0	0	0	0	0	0	0	0	2	212	4	618	0	0	2	162	0	0	0	0	0	0	3	277	0	0	0	0	0	0	0	0	1	418	0	0
5:10070156-10070477	AT5G28060,	2	-	0	0	0	0	0	0	1	3484	3	7851	1	12121	0	0	2	11386	0	0	1	1121	0	0	0	0	0	0	0	0	0	0	0	0	3	7712	1	5709
5:14892940-14893314	AT5G37500,	2	-	0	0	0	0	0	0	0	0	2	175	1	230	4	494	5	567	0	0	0	0	0	0	0	0	0	0	0	0	0	0	0	0	0	0	0	0
5:15004867-15005005	AT5G37780,	1	+	0	0	0	0	1	1004	0	0	0	0	0	0	1	4736	4	6033	2	376	0	0	0	0	2	2364	0	0	0	0	0	0	2	3849	0	0	0	0
5:15517297-15521015	n/a		+	0	0	0	0	0	0	0	0	1	35	2	63	4	59	3	91	0	0	0	0	0	0	0	0	0	0	0	0	0	0	0	0	2	24	0	0
5:16185356-16185668	AT5G40450,	2	-	0	0	0	0	0	0	0	0	0	0	0	0	0	0	5	2510	0	0	0	0	0	0	7	1908	0	0	0	0	0	0	0	0	0	0	0	0
5:16366553-16366753	AT5G40850,	1	+	2	143	5	379	0	0	0	0	0	0	3	653	0	0	0	0	0	0	2	172	0	0	0	0	0	0	0	0	0	0	0	0	0	0	0	0
5:2824570-2828153	n/a		+	0	0	0	0	4	959	2	947	0	0	0	0	5	1985	0	0	0	0	0	0	0	0	0	0	0	0	0	0	0	0	0	0	1	1399	0	0
5:4865208-4865576	AT5G15020,	2	-	2	74	0	0	0	0	0	0	1	326	1	949	0	0	2	531	0	0	0	0	0	0	1	548	2	124	0	0	0	0	2	508	1	327	0	0
Pt:419-556	ATCG00020,	1	+	0	0	0	0	6	6208417	0	0	0	0	0	0	0	0	0	0	5	1914894	0	0	0	0	1	7331380	0	0	0	0	0	0	0	0	0	0	0	0
Pt:55094-55344	ATCG00490,	1	-	0	0	0	0	5	1470157	7	1454868	0	0	0	0	0	0	0	0	0	0	0	0	0	0	0	0	0	0	0	0	0	0	0	0	0	0	0	0
Pt:601-13395	n/a		-	0	0	0	0	0	0	0	0	0	0	0	0	0	0	0	0	0	0	12	1841861	0	0	0	0	0	0	0	0	0	0	0	0	0	0	0	0
Pt:73557-73715	ATCG00680,	1	+	0	0	0	0	0	0	2	174449	0	0	0	0	0	0	0	0	1	46685	4	231058	0	0	0	0	0	0	0	0	2	37588	1	83310	1	67194	1	68317
1:11779374-11780741	n/a		+	0	0	0	0	0	0	0	0	4	260	4	715	0	0	2	284	0	0	1	27	0	0	0	0	0	0	0	0	0	0	0	0	0	0	0	0
1:19521945-19522146	AT1G52410,	2	+	0	0	3	171	0	0	0	0	0	0	0	0	0	0	0	0	0	0	0	0	0	0	0	0	2	214	0	0	0	0	0	0	6	838	0	0
1:20067812-20080883	n/a		-	0	0	0	0	0	0	0	0	3	435	4	468	0	0	0	0	0	0	0	0	0	0	0	0	0	0	0	0	2	267	0	0	2	1051	0	0
1:20076661-20076975	AT1G53780,	1	-	0	0	0	0	0	0	2	115	2	271	2	477	0	0	2	646	0	0	0	0	0	0	0	0	1	91	0	0	0	0	2	214	0	0	0	0
1:24490431-24491017	AT1G65840,	3	+	0	0	0	0	0	0	0	0	0	0	3	476	6	364	1	499	0	0	1	89	0	0	0	0	0	0	0	0	0	0	0	0	0	0	0	0
1:29955203-29956360	AT1G79610,	7	-	0	0	0	0	0	0	0	0	1	167	3	227	3	385	0	0	0	0	0	0	0	0	0	0	3	33	0	0	0	0	0	0	0	0	1	246
1:3347021-3347437	AT1G10200,	3	-	0	0	0	0	0	0	0	0	2	2800	0	0	1	3497	4	4492	0	0	1	953	0	0	0	0	0	0	0	0	0	0	2	1717	1	1150	0	0
1:7178290-7180754	n/a		+	0	0	6	2306	0	0	0	0	0	0	5	6724	0	0	0	0	0	0	0	0	0	0	0	0	0	0	0	0	0	0	0	0	0	0	0	0
2:10514282-10514780	AT2G24700,	2	-	0	0	0	0	0	0	0	0	2	82	3	165	1	91	3	114	0	0	0	0	0	0	0	0	0	0	0	0	0	0	1	27	0	0	1	22
2:11413187-11414082	AT2G26780,	5	+	0	0	0	0	1	112	0	0	0	0	0	0	2	345	0	0	1	22	0	0	0	0	5	204	1	87	0	0	0	0	1	261	0	0	0	0
2:13174757-13174947	AT2G30950,	1	+	0	0	2	4788	1	3451	0	0	0	0	0	0	0	0	0	0	2	1239	5	5186	0	0	0	0	0	0	0	0	0	0	1	3646	0	0	0	0
2:13182778-13183082	AT2G30980,	2	-	1	210	0	0	3	498	0	0	0	0	0	0	1	917	3	1246	0	0	0	0	0	0	2	1198	0	0	0	0	0	0	1	639	0	0	0	0
2:15170708-15170896	AT2G36160,	2	+	0	0	0	0	0	0	0	0	0	0	0	0	0	0	5	5176	0	0	0	0	0	0	0	0	0	0	0	0	1	2430	1	4017	0	0	4	3144
2:17138674-17138943	AT2G41100,	1	+	0	0	0	0	4	2110	0	0	0	0	0	0	2	2407	2	3056	0	0	0	0	3	2003	0	0	0	0	0	0	0	0	0	0	0	0	0	0
2:17709677-17711466	n/a		-	0	0	0	0	0	0	0	0	0	0	0	0	0	0	0	0	0	0	0	0	4	14238	0	0	0	0	0	0	0	0	2	1872	5	4504	0	0
2:18625155-18625349	AT2G45170,	2	+	0	0	0	0	1	944	0	0	0	0	0	0	0	0	2	1099	0	0	0	0	0	0	1	1097	3	373	2	378	0	0	0	0	2	948	0	0
2:2230283-2230610	AT2G05830,	2	+	0	0	0	0	0	0	0	0	0	0	0	0	1	749	0	0	0	0	2	183	0	0	5	433	0	0	0	0	0	0	0	0	1	404	2	341
2:6369536-6370009	AT2G14835,	2	+	0	0	0	0	1	193	2	174	1	297	1	460	1	465	0	0	0	0	0	0	0	0	0	0	1	99	0	0	0	0	1	350	3	291	0	0
2:7547857-7548014	AT2G17360,	1	+	0	0	3	3468	0	0	0	0	5	3479	0	0	0	0	0	0	0	0	0	0	0	0	0	0	0	0	0	0	0	0	3	5154	0	0	0	0
2:9581871-9582430	AT2G22540,	4	+	0	0	0	0	0	0	0	0	0	0	4	2780	1	1310	1	1710	0	0	0	0	0	0	0	0	3	558	1	511	1	161	0	0	0	0	0	0
3:1528910-1530256	AT3G05350,	5	-	0	0	2	228	1	289	3	282	0	0	0	0	0	0	0	0	1	59	0	0	0	0	0	0	3	198	0	0	0	0	0	0	1	175	0	0
3:18166956-18168061	AT3G49010,	4	-	0	0	1	2297	0	0	1	2208	1	2147	1	2459	0	0	0	0	0	0	0	0	0	0	1	524	0	0	1	539	0	0	3	3102	2	3546	0	0
3:22900266-22901255	AT3G61860,	4	-	0	0	0	0	0	0	0	0	2	389	2	606	2	898	0	0	0	0	0	0	0	0	1	295	0	0	0	0	3	179	1	436	0	0	0	0
3:3339812-3340668	AT3G10690,	5	-	2	90	2	231	1	149	1	186	1	71	0	0	1	227	0	0	0	0	0	0	0	0	0	0	0	0	1	59	0	0	0	0	2	154	0	0
3:5399903-5400101	AT3G15950,	2	-	0	0	0	0	2	990	2	997	0	0	0	0	0	0	7	2493	0	0	0	0	0	0	0	0	0	0	0	0	0	0	0	0	0	0	0	0
3:5401080-5401293	AT3G15950,	2	-	3	412	0	0	3	1109	5	1066	0	0	0	0	0	0	0	0	0	0	0	0	0	0	0	0	0	0	0	0	0	0	0	0	0	0	0	0
3:8954439-8962170	n/a		+	0	0	0	0	2	207	0	0	0	0	0	0	2	408	4	511	0	0	0	0	0	0	0	0	0	0	0	0	0	0	0	0	1	185	2	190
4:13077475-13077713	AT4G25640,	1	-	0	0	1	125	3	203	0	0	0	0	1	185	0	0	1	201	0	0	0	0	0	0	0	0	2	105	0	0	1	367	0	0	2	1201	0	0
4:1318913-1476561	n/a		+	0	0	0	0	0	0	0	0	0	0	0	0	0	0	0	0	0	0	0	0	0	0	0	0	0	0	0	0	0	0	0	0	0	0	11	114340
4:14961208-14961558	AT4G30690,	3	+	0	0	0	0	2	400	1	311	0	0	0	0	1	219	0	0	0	0	0	0	0	0	2	1415	1	262	0	0	0	0	1	365	3	205	0	0
4:6662514-6665710	n/a		+	0	0	0	0	0	0	0	0	2	49	4	112	3	72	0	0	0	0	1	8	0	0	1	14	0	0	0	0	0	0	0	0	0	0	0	0
4:9489372-9490811	AT4G16860,	3	-	1	59	1	165	0	0	0	0	0	0	0	0	0	0	0	0	0	0	0	0	0	0	5	1011	0	0	0	0	0	0	3	260	0	0	1	122
4:9516075-9537015	n/a		-	0	0	0	0	0	0	1	13	0	0	0	0	3	46	1	57	0	0	0	0	0	0	2	28	0	0	0	0	0	0	0	0	1	26	3	22
5:14738507-14739714	n/a		-	0	0	0	0	1	1	0	0	1	31	5	80	2	37	2	33	0	0	0	0	0	0	0	0	0	0	0	0	0	0	0	0	0	0	0	0
5:1678373-1678595	AT5G05610,	1	-	0	0	0	0	3	255	2	246	0	0	2	646	1	755	0	0	0	0	0	0	0	0	1	345	0	0	0	0	0	0	2	490	0	0	0	0
5:21888361-21888507	AT5G53902,	1	+	2	12864	0	0	0	0	0	0	0	0	1	18624	0	0	0	0	0	0	0	0	0	0	0	0	4	16701	0	0	0	0	4	19613	0	0	0	0
5:21990610-21990806	n/a		+	0	0	0	0	0	0	3	754	0	0	0	0	4	1321	1	1400	0	0	0	0	0	0	0	0	0	0	0	0	0	0	0	0	3	2138	0	0
5:2522594-2523409	AT5G07910,	5	-	0	0	0	0	0	0	0	0	2	174	2	255	2	235	2	293	0	0	0	0	0	0	0	0	0	0	0	0	2	92	0	0	1	207	0	0
5:26274150-26275236	AT5G65685,	5	-	0	0	0	0	1	215	0	0	5	460	2	706	1	534	0	0	0	0	0	0	0	0	0	0	0	0	0	0	0	0	2	349	0	0	0	0
5:3632738-3633022	AT5G11380,	1	+	0	0	3	59	0	0	1	79	0	0	2	128	2	137	1	174	0	0	0	0	0	0	1	117	0	0	0	0	0	0	0	0	1	129	0	0
5:7962537-7963227	AT5G23630,	3	-	0	0	0	0	0	0	0	0	1	300	3	536	1	482	2	639	0	0	0	0	0	0	2	253	0	0	0	0	0	0	0	0	2	240	0	0
Pt:116294-116482	ATCG01050,	1	+	0	0	2	28739	3	38983	3	38453	0	0	0	0	0	0	0	0	0	0	0	0	0	0	0	0	0	0	0	0	0	0	2	22746	1	18431	0	0
Pt:54965-55105	ATCG00490,	1	-	0	0	3	1812855	7	1493380	1	1461669	0	0	0	0	0	0	0	0	0	0	0	0	0	0	0	0	0	0	0	0	0	0	0	0	0	0	0	0
Pt:739-944	ATCG00020,	1	-	0	0	0	0	4	9389100	5	8531784	0	0	0	0	0	0	0	0	0	0	0	0	2	4457987	0	0	0	0	0	0	0	0	0	0	0	0	0	0
1:10075360-10075858	AT1G28670,	2	-	1	120	0	0	2	375	3	332	0	0	0	0	0	0	0	0	0	0	0	0	0	0	2	124	0	0	0	0	1	38	0	0	1	83	0	0
1:10888620-10888856	AT1G30690,	1	+	0	0	0	0	0	0	0	0	0	0	8	3303	0	0	0	0	0	0	0	0	0	0	0	0	0	0	0	0	0	0	2	1203	0	0	0	0
1:12381927-12384513	n/a		-	0	0	0	0	0	0	0	0	5	38	4	77	0	0	1	86	0	0	0	0	0	0	0	0	0	0	0	0	0	0	0	0	0	0	0	0
1:20290944-20291230	AT1G54360,	2	+	0	0	0	0	1	167	1	171	4	164	0	0	1	425	2	524	0	0	0	0	0	0	0	0	0	0	0	0	0	0	1	170	0	0	0	0
1:2828380-2828581	AT1G08830,	2	+	0	0	1	1107	0	0	0	0	1	1447	0	0	0	0	5	1457	0	0	0	0	0	0	0	0	0	0	0	0	0	0	2	3126	1	5050	0	0
1:30059886-30064646	n/a		-	0	0	0	0	0	0	0	0	0	0	0	0	0	0	0	0	10	24	0	0	0	0	0	0	0	0	0	0	0	0	0	0	0	0	0	0
1:3016098-3016334	AT1G09340,	2	+	0	0	0	0	4	4765	2	4659	0	0	0	0	0	0	0	0	0	0	0	0	0	0	0	0	0	0	1	3093	0	0	0	0	1	2763	2	2396
1:7879089-7880684	AT1G22300,	5	-	1	334	0	0	0	0	0	0	0	0	2	5980	2	3468	3	4143	0	0	0	0	0	0	0	0	0	0	0	0	0	0	2	2997	0	0	0	0
1:9407668-9408594	AT1G27100,	2	-	0	0	0	0	0	0	0	0	3	617	2	1110	2	939	2	1151	0	0	0	0	0	0	0	0	0	0	0	0	0	0	0	0	1	477	0	0
1:949734-951211	AT1G03780,	7	-	0	0	0	0	0	0	0	0	0	0	4	240	0	0	0	0	0	0	0	0	0	0	0	0	0	0	0	0	0	0	2	115	2	161	2	178
2:10778489-10779159	AT2G25310,	3	-	0	0	0	0	0	0	0	0	1	386	1	514	0	0	0	0	0	0	0	0	0	0	0	0	3	108	0	0	1	249	1	395	2	411	1	288
2:17699176-17700174	AT2G42500,	4	-	1	138	0	0	0	0	1	353	2	729	0	0	0	0	0	0	0	0	0	0	0	0	1	473	0	0	0	0	0	0	1	678	0	0	4	616
2:18525731-18526165	AT2G44920,	3	+	0	0	1	715	1	816	0	0	0	0	0	0	0	0	0	0	0	0	1	672	1	457	1	1367	1	576	3	489	0	0	1	467	0	0	0	0
2:9216698-9217120	AT2G21520,	2	+	0	0	0	0	0	0	1	436	0	0	1	1704	2	1011	2	1257	0	0	1	329	0	0	3	495	0	0	0	0	0	0	0	0	0	0	0	0
3:17169794-17170605	AT3G46614,	5	-	1	4	0	0	0	0	1	5	2	58	3	50	0	0	2	61	0	0	1	4	0	0	0	0	0	0	0	0	0	0	0	0	0	0	0	0
3:17173557-17174520	n/a		-	0	0	0	0	0	0	0	0	0	0	2	92	2	58	0	0	0	0	1	1	0	0	0	0	0	0	1	2	0	0	1	10	3	11	0	0
3:17302215-17302478	AT3G46970,	1	-	1	822	0	0	0	0	0	0	0	0	0	0	0	0	0	0	0	0	0	0	1	2492	3	7505	0	0	1	2554	2	396	0	0	1	366	1	369
3:2064711-2071634	n/a		-	0	0	1	21	0	0	0	0	0	0	0	0	0	0	0	0	1	6	1	13	0	0	2	71	2	23	1	16	2	29	0	0	0	0	0	0
3:21207219-21207397	AT3G57300,	0	+	0	0	0	0	0	0	0	0	0	0	0	0	2	11	2	19	0	0	0	0	0	0	0	0	0	0	0	0	0	0	0	0	6	15	0	0
3:3172328-3172512	AT3G10260,	1	-	0	0	0	0	0	0	2	386	0	0	1	1433	0	0	2	1656	0	0	0	0	0	0	0	0	0	0	2	399	0	0	1	886	2	843	0	0
3:3339812-3340050	AT3G10690,	2	-	0	0	2	255	0	0	0	0	1	89	2	163	0	0	2	280	0	0	0	0	0	0	0	0	0	0	0	0	0	0	0	0	2	154	1	158
3:4876254-4881913	n/a		-	0	0	0	0	0	0	0	0	0	0	1	3	0	0	0	0	0	0	0	0	0	0	0	0	0	0	0	0	0	0	0	0	0	0	9	63
3:523386-524409	AT3G02510,	4	-	0	0	0	0	1	57	0	0	0	0	6	591	0	0	0	0	0	0	0	0	0	0	1	93	0	0	0	0	1	78	1	112	0	0	0	0
3:5400655-5400854	AT3G15950,	2	-	0	0	0	0	0	0	0	0	0	0	0	0	10	2222	0	0	0	0	0	0	0	0	0	0	0	0	0	0	0	0	0	0	0	0	0	0
3:5543983-5544315	AT3G16340,	1	+	0	0	0	0	0	0	0	0	3	1194	2	2152	0	0	4	1239	0	0	0	0	0	0	0	0	0	0	1	27	0	0	0	0	0	0	0	0
3:6466323-6468779	n/a		-	0	0	0	0	0	0	0	0	1	296	1	510	2	188	2	258	0	0	0	0	0	0	1	88	0	0	0	0	0	0	1	111	2	56	0	0
4:12657713-12657875	AT4G24490,	1	-	0	0	0	0	0	0	0	0	0	0	0	0	2	277	0	0	0	0	0	0	0	0	7	130	0	0	0	0	0	0	0	0	1	241	0	0
4:16429097-16429286	AT4G34350,	2	+	0	0	0	0	0	0	0	0	0	0	5	1026	0	0	0	0	0	0	5	1250	0	0	0	0	0	0	0	0	0	0	0	0	0	0	0	0
4:7843254-7843449	AT4G13495,	1	+	1	1178	0	0	2	2487	5	2225	0	0	0	0	0	0	0	0	2	998	0	0	0	0	0	0	0	0	0	0	0	0	0	0	0	0	0	0
4:9206960-9211511	AT4G16280,	18	-	0	0	0	0	0	0	0	0	0	0	0	0	0	0	1	140	0	0	0	0	0	0	0	0	0	0	0	0	0	0	1	95	3	78	5	79
5:1134326-1134820	AT5G04140,	3	+	2	892	1	2224	0	0	2	2879	0	0	0	0	0	0	0	0	0	0	1	1957	1	826	1	2688	0	0	0	0	0	0	0	0	2	933	0	0
5:16883549-16890470	n/a		+	0	0	0	0	0	0	0	0	0	0	0	0	2	41	0	0	0	0	0	0	0	0	0	0	0	0	1	33	0	0	0	0	7	232	0	0
5:20717696-20717855	AT5G50920,	1	-	0	0	0	0	0	0	0	0	0	0	0	0	0	0	0	0	0	0	10	5694	0	0	0	0	0	0	0	0	0	0	0	0	0	0	0	0
5:2152648-2152906	AT5G06950,	2	+	0	0	0	0	1	67	0	0	0	0	3	283	0	0	2	254	0	0	0	0	0	0	1	136	0	0	0	0	2	87	0	0	0	0	1	144
5:22430550-22430718	AT5G55310,	1	-	0	0	0	0	0	0	0	0	0	0	2	405	1	276	4	347	0	0	0	0	0	0	0	0	0	0	0	0	0	0	0	0	3	232	0	0
5:26274150-26275514	AT5G65685,	6	-	0	0	1	168	0	0	0	0	0	0	1	478	4	521	3	690	0	0	0	0	0	0	0	0	0	0	0	0	0	0	0	0	0	0	1	260
5:6021766-6022181	AT5G18230,	2	-	0	0	0	0	1	413	1	372	0	0	2	1058	2	901	0	0	0	0	0	0	0	0	1	1021	1	292	0	0	0	0	1	747	0	0	1	565
5:6022253-6022516	AT5G18230,	1	-	0	0	0	0	1	393	1	386	2	525	2	1118	1	851	1	1113	0	0	0	0	0	0	0	0	0	0	0	0	0	0	2	717	0	0	0	0
5:8034596-8036561	n/a		+	0	0	0	0	0	0	0	0	3	594	3	702	3	400	1	526	0	0	0	0	0	0	0	0	0	0	0	0	0	0	0	0	0	0	0	0
Pt:33684-33899	n/a		+	0	0	0	0	0	0	6	232227	0	0	0	0	0	0	0	0	0	0	0	0	0	0	0	0	0	0	0	0	0	0	0	0	2	80639	2	94377
Pt:54864-119676	n/a		+	0	0	7	1083686	0	0	0	0	0	0	0	0	0	0	0	0	1	189022	1	825318	0	0	0	0	0	0	0	0	0	0	1	533936	0	0	0	0
Pt:55655-55921	ATCG00490,	1	+	0	0	0	0	2	2010902	5	1949026	0	0	0	0	0	0	0	0	1	545214	0	0	0	0	0	0	0	0	0	0	0	0	0	0	0	0	2	688021
1:12599082-12601053	AT1G34460,	6	+	0	0	1	13	0	0	0	0	2	35	1	63	1	79	3	95	0	0	0	0	0	0	0	0	0	0	1	8	0	0	0	0	0	0	0	0
1:12599082-12601145	AT1G34460,	7	+	0	0	0	0	0	0	2	15	1	37	1	65	1	70	1	88	0	0	0	0	2	9	0	0	0	0	0	0	1	21	0	0	0	0	0	0
1:12960465-12960727	AT1G35320,	1	-	0	0	0	0	1	23	0	0	0	0	1	1227	0	0	5	1749	0	0	0	0	0	0	0	0	0	0	0	0	0	0	0	0	0	0	2	578
1:19522574-19522759	AT1G52410,	2	+	0	0	1	144	0	0	3	129	0	0	0	0	0	0	0	0	0	0	1	173	0	0	0	0	0	0	0	0	2	611	0	0	2	959	0	0
1:20413944-20414198	AT1G54680,	2	+	0	0	0	0	0	0	1	34	0	0	2	101	2	68	1	100	0	0	1	17	0	0	0	0	0	0	0	0	0	0	1	69	1	50	0	0
1:21091768-21091960	AT1G56340,	1	-	0	0	0	0	0	0	0	0	0	0	0	0	1	3254	4	3954	0	0	0	0	0	0	0	0	0	0	0	0	0	0	0	0	3	2524	1	2497
1:22337858-22338384	AT1G60640,	4	-	0	0	0	0	0	0	0	0	0	0	0	0	0	0	9	604	0	0	0	0	0	0	0	0	0	0	0	0	0	0	0	0	0	0	0	0
1:22356406-22359675	n/a		-	0	0	0	0	0	0	2	261	0	0	1	2250	3	1652	0	0	0	0	0	0	0	0	1	526	0	0	0	0	0	0	0	0	2	854	0	0
1:24301628-24302463	AT1G65430,	3	-	0	0	1	108	0	0	3	91	0	0	2	368	2	284	0	0	0	0	0	0	0	0	1	189	0	0	0	0	0	0	0	0	0	0	0	0
1:26500650-26501040	AT1G70320,	2	-	1	83	0	0	0	0	0	0	3	337	1	568	0	0	1	976	1	28	0	0	0	0	1	233	0	0	0	0	0	0	1	455	0	0	0	0
1:2678103-2678754	AT1G08465,	4	+	0	0	1	187	1	169	0	0	0	0	0	0	0	0	0	0	1	37	1	87	0	0	2	228	0	0	0	0	0	0	1	383	0	0	2	401
1:29345983-29346759	AT1G78040,	2	+	0	0	0	0	1	4327	0	0	0	0	1	14626	3	12685	1	15332	0	0	0	0	0	0	0	0	0	0	0	0	1	4959	1	8790	1	8819	0	0
1:30009547-30009798	AT1G79750,	2	-	0	0	0	0	0	0	0	0	2	887	0	0	1	1662	0	0	2	63	0	0	0	0	0	0	0	0	0	0	0	0	1	869	1	844	2	849
1:4155090-4155334	AT1G12240,	1	+	0	0	1	281	0	0	0	0	0	0	0	0	0	0	0	0	0	0	2	246	1	252	1	858	1	1124	1	895	1	663	0	0	1	1077	0	0
1:5566449-5566862	AT1G16270,	2	+	0	0	0	0	1	86	0	0	0	0	2	398	0	0	2	402	0	0	0	0	0	0	0	0	1	57	0	0	0	0	0	0	1	155	2	162
1:7445903-7446073	AT1G21270,	1	+	0	0	1	149	0	0	0	0	0	0	0	0	0	0	0	0	0	0	0	0	2	246	1	708	1	252	3	463	0	0	0	0	0	0	1	16
1:948429-951211	AT1G03780,	13	-	4	88	3	133	1	95	0	0	0	0	0	0	0	0	0	0	0	0	0	0	0	0	0	0	0	0	0	0	1	79	0	0	0	0	0	0
2:11311833-11312365	AT2G26590,	3	-	0	0	0	0	0	0	0	0	0	0	0	0	0	0	1	657	0	0	0	0	6	91	0	0	0	0	0	0	0	0	2	503	0	0	0	0
2:12545738-12550795	n/a		-	0	0	0	0	0	0	0	0	0	0	0	0	1	344	3	416	0	0	0	0	0	0	4	104	0	0	0	0	0	0	0	0	1	206	0	0
2:15510368-15510719	AT2G36930,	2	-	0	0	0	0	0	0	2	250	0	0	5	1617	0	0	0	0	0	0	0	0	2	230	0	0	0	0	0	0	0	0	0	0	0	0	0	0
2:19278343-19278607	AT2G46920,	1	-	1	27	0	0	0	0	0	0	2	273	2	508	1	427	3	512	0	0	0	0	0	0	0	0	0	0	0	0	0	0	0	0	0	0	0	0
2:2925886-2926336	AT2G07050,	2	+	0	0	0	0	2	453	0	0	0	0	3	609	1	527	0	0	0	0	0	0	0	0	1	566	0	0	1	224	0	0	0	0	1	437	0	0
2:558254-558659	AT2G02170,	2	-	0	0	0	0	0	0	0	0	1	245	0	0	0	0	1	305	0	0	1	54	0	0	2	109	1	41	0	0	0	0	1	206	0	0	2	193
2:7600495-7601393	n/a		+	0	0	0	0	0	0	2	1	0	0	0	0	0	0	0	0	0	0	1	0	0	0	0	0	0	0	0	0	0	0	0	0	3	13	3	12
2:8737397-8737581	AT2G20260,	2	+	0	0	4	3780	3	4451	0	0	0	0	0	0	0	0	0	0	0	0	0	0	0	0	0	0	0	0	0	0	0	0	0	0	0	0	2	1711
2:9637582-9637874	AT2G22670,	2	+	0	0	0	0	0	0	0	0	3	2891	2	3599	0	0	0	0	1	386	0	0	0	0	0	0	0	0	0	0	1	2146	2	3660	0	0	0	0
2:9755279-9787547	n/a		+	0	0	0	0	0	0	0	0	0	0	0	0	0	0	0	0	0	0	0	0	1	802	8	2398	0	0	0	0	0	0	0	0	0	0	0	0
3:10454930-10460602	n/a		+	0	0	1	85	0	0	0	0	0	0	0	0	0	0	0	0	0	0	1	83	3	46	2	191	0	0	0	0	0	0	2	150	0	0	0	0
3:1312315-1312796	AT3G04780,	2	-	0	0	1	229	0	0	0	0	2	699	1	1155	0	0	1	1029	0	0	0	0	0	0	0	0	0	0	0	0	0	0	1	627	2	628	1	489
3:15568836-15569288	AT3G43670,	1	+	0	0	0	0	0	0	0	0	1	405	0	0	4	456	0	0	1	55	0	0	0	0	2	499	0	0	0	0	0	0	1	105	0	0	0	0
3:1621792-1622036	AT3G05590,	2	+	0	0	0	0	2	2946	1	2886	0	0	0	0	1	5625	3	6658	0	0	0	0	0	0	0	0	0	0	0	0	0	0	0	0	2	4924	0	0
3:17154449-17154741	AT3G46590,	2	+	0	0	0	0	0	0	0	0	1	262	0	0	0	0	3	622	0	0	0	0	1	200	0	0	1	120	0	0	0	0	1	323	2	383	0	0
3:18167710-18168061	AT3G49010,	2	-	0	0	0	0	2	3058	1	3094	0	0	0	0	2	5338	3	6833	0	0	0	0	0	0	0	0	0	0	0	0	0	0	1	4306	0	0	0	0
3:22587078-22598919	n/a		+	0	0	0	0	0	0	0	0	0	0	0	0	3	250	3	326	0	0	0	0	0	0	0	0	0	0	0	0	0	0	0	0	0	0	3	226
3:2497918-2503284	n/a		-	0	0	0	0	0	0	0	0	0	0	0	0	0	0	0	0	0	0	0	0	0	0	0	0	0	0	0	0	1	884	4	1369	4	2352	0	0
3:4275772-4276227	AT3G13240,	2	+	0	0	0	0	0	0	3	157	0	0	0	0	0	0	0	0	0	0	1	147	0	0	0	0	0	0	0	0	2	138	2	278	1	220	0	0
3:5399180-5399354	AT3G15950,	2	-	2	261	0	0	0	0	0	0	7	2166	0	0	0	0	0	0	0	0	0	0	0	0	0	0	0	0	0	0	0	0	0	0	0	0	0	0
3:5566479-5566710	AT3G16400,	1	+	0	0	0	0	2	517	0	0	3	2382	2	6013	0	0	2	1819	0	0	0	0	0	0	0	0	0	0	0	0	0	0	0	0	0	0	0	0
3:5953153-5953295	AT3G17390,AT3G03475,	1	-	0	0	0	0	1	5250	0	0	0	0	0	0	4	16510	2	20794	0	0	0	0	0	0	0	0	0	0	0	0	0	0	0	0	2	5365	0	0
3:6142473-6142819	AT3G17930,	2	-	0	0	1	845	0	0	0	0	1	106	1	331	0	0	0	0	0	0	0	0	0	0	1	1831	0	0	0	0	0	0	1	788	3	257	1	332
3:6822490-6822721	AT3G19640,	1	+	0	0	0	0	1	133	2	133	0	0	0	0	4	770	2	890	0	0	0	0	0	0	0	0	0	0	0	0	0	0	0	0	0	0	0	0
3:7609637-7610205	AT3G21610,	3	-	0	0	0	0	1	123	0	0	0	0	2	432	1	342	3	473	0	0	0	0	0	0	0	0	1	52	0	0	0	0	0	0	0	0	1	224
3:7956137-7957631	AT3G22430,	2	+	0	0	1	23	0	0	0	0	0	0	1	101	1	139	1	168	0	0	2	21	2	13	0	0	0	0	1	16	0	0	0	0	0	0	0	0
3:86868-87079	AT3G01280,	2	+	0	0	0	0	0	0	0	0	2	1559	0	0	3	2654	1	3325	0	0	0	0	0	0	0	0	0	0	0	0	0	0	0	0	0	0	3	1836
4:11390206-11390688	AT4G21380,	2	-	0	0	0	0	0	0	0	0	0	0	0	0	0	0	0	0	0	0	0	0	6	143	0	0	0	0	0	0	0	0	0	0	3	75	0	0
4:14130032-14130315	AT4G28600,	1	+	0	0	0	0	0	0	0	0	2	255	3	539	0	0	0	0	0	0	1	105	0	0	1	232	0	0	0	0	0	0	1	310	1	262	0	0
4:16044793-16046106	AT4G33270,	3	-	2	220	0	0	1	188	0	0	1	211	2	383	0	0	1	540	0	0	0	0	0	0	0	0	0	0	0	0	0	0	2	215	0	0	0	0
4:17510760-17511002	AT4G37200,	1	-	1	130	0	0	1	358	0	0	0	0	0	0	0	0	0	0	0	0	0	0	0	0	3	357	1	149	0	0	0	0	1	294	2	485	0	0
4:37274-37567	AT4G00100,	2	+	0	0	0	0	0	0	0	0	1	2556	1	3197	0	0	0	0	0	0	0	0	0	0	1	960	0	0	0	0	0	0	1	3840	3	3707	2	3280
4:478156-478319	AT4G01100,	1	+	0	0	0	0	0	0	0	0	0	0	2	1253	0	0	1	1572	0	0	0	0	1	319	0	0	2	272	2	276	1	490	0	0	0	0	0	0
4:6478611-6479095	AT4G10480,	3	-	1	1019	0	0	0	0	0	0	0	0	4	3057	0	0	0	0	0	0	0	0	0	0	0	0	0	0	0	0	1	1551	2	4247	0	0	1	1632
4:6884839-6888206	n/a		+	0	0	0	0	0	0	0	0	4	10156	5	20741	0	0	0	0	0	0	0	0	0	0	0	0	0	0	0	0	0	0	0	0	0	0	0	0
4:9207163-9211511	AT4G16280,	17	-	0	0	0	0	1	52	0	0	0	0	3	122	2	139	1	152	0	0	0	0	1	24	1	54	0	0	0	0	0	0	0	0	0	0	0	0
5:1110701-1114142	AT5G04110,	9	-	0	0	0	0	0	0	1	54	0	0	0	0	0	0	0	0	0	0	0	0	0	0	0	0	0	0	0	0	0	0	1	131	5	194	2	161
5:16185564-16185818	AT5G40450,	2	-	0	0	0	0	0	0	1	303	0	0	5	2456	0	0	3	2023	0	0	0	0	0	0	0	0	0	0	0	0	0	0	0	0	0	0	0	0
5:16809221-16810133	AT5G42020,	3	-	0	0	0	0	0	0	0	0	0	0	1	1263	2	1594	1	1926	0	0	0	0	0	0	0	0	0	0	0	0	0	0	0	0	3	1730	2	1782
5:19815835-19816283	AT5G48880,	3	-	0	0	0	0	0	0	0	0	0	0	0	0	0	0	0	0	0	0	1	174	0	0	0	0	2	369	0	0	0	0	1	953	2	2631	3	2168
5:22218486-22218648	AT5G54680,	1	+	0	0	1	522	1	544	0	0	0	0	2	1797	2	1232	1	1539	0	0	0	0	0	0	0	0	0	0	1	388	1	564	0	0	0	0	0	0
5:24289238-24289380	AT5G60390,	1	+	0	0	0	0	0	0	0	0	0	0	4	32355	0	0	1	28414	0	0	0	0	0	0	0	0	0	0	0	0	0	0	4	28300	0	0	0	0
5:24296902-24297456	AT5G60410,	3	+	0	0	0	0	1	237	0	0	0	0	0	0	3	579	0	0	0	0	0	0	0	0	2	384	0	0	0	0	0	0	1	308	1	403	1	313
5:24684764-24684973	AT5G61410,	2	-	1	2235	0	0	0	0	4	4439	0	0	0	0	0	0	0	0	2	1260	0	0	0	0	0	0	0	0	0	0	1	1943	1	3646	0	0	0	0
5:24890289-24890484	AT5G61970,	1	+	0	0	1	165	0	0	0	0	0	0	1	415	2	547	3	711	0	0	0	0	0	0	0	0	1	110	1	110	0	0	0	0	0	0	0	0
5:26010546-26010725	AT5G65110,	1	-	0	0	0	0	0	0	0	0	3	319	0	0	1	467	1	558	0	0	0	0	0	0	0	0	0	0	2	90	0	0	1	413	0	0	1	574
5:2632524-2632665	AT5G01505,	1	-	0	0	0	0	1	66	0	0	0	0	0	0	2	175	4	189	0	0	0	0	0	0	0	0	0	0	0	0	0	0	0	0	2	212	0	0
5:5582650-5585679	n/a		-	0	0	2	55	0	0	0	0	2	67	0	0	0	0	2	177	0	0	0	0	0	0	0	0	0	0	0	0	0	0	0	0	3	169	0	0
5:6024616-6025209	AT5G18230,	3	-	0	0	0	0	1	406	0	0	3	540	0	0	1	902	1	1132	0	0	0	0	0	0	0	0	0	0	0	0	0	0	1	631	2	643	0	0
5:8064612-8064829	AT5G23900,	2	+	0	0	0	0	3	1210	0	0	0	0	0	0	2	2617	3	3214	0	0	0	0	0	0	0	0	0	0	0	0	0	0	0	0	1	2005	0	0
5:8210759-8213066	n/a		-	0	0	0	0	0	0	1	6	0	0	2	21	0	0	0	0	2	0	1	3	0	0	1	2	0	0	0	0	0	0	0	0	0	0	2	5
Pt:1114-1325	ATCG00020,	1	+	0	0	0	0	0	0	0	0	0	0	0	0	0	0	0	0	0	0	0	0	2	3291862	0	0	0	0	0	0	0	0	0	0	0	0	7	1445564
Pt:32850-33035	ATCG00270,	1	+	4	32942	5	94180	0	0	0	0	0	0	0	0	0	0	0	0	0	0	0	0	0	0	0	0	0	0	0	0	0	0	0	0	0	0	0	0
Pt:55772-55954	ATCG00490,	1	+	0	0	0	0	7	1832903	0	0	0	0	0	0	0	0	0	0	0	0	0	0	0	0	0	0	0	0	0	0	0	0	0	0	2	773756	0	0
Pt:56096-56311	ATCG00490,	1	+	0	0	0	0	0	0	6	1676502	0	0	0	0	0	0	0	0	0	0	0	0	0	0	0	0	0	0	0	0	0	0	0	0	0	0	3	603654
Pt:601-119703	n/a		-	0	0	9	730230	0	0	0	0	0	0	0	0	0	0	0	0	0	0	0	0	0	0	0	0	0	0	0	0	0	0	0	0	0	0	0	0
1:10475164-10478747	n/a		+	0	0	0	0	4	128320	3	116522	0	0	0	0	0	0	0	0	0	0	0	0	0	0	0	0	0	0	0	0	0	0	0	0	0	0	1	29599
1:10478707-10478918	AT1G29930,	1	+	1	57072	2	74452	0	0	0	0	0	0	0	0	0	0	0	0	0	0	3	109705	0	0	0	0	0	0	0	0	2	24398	0	0	0	0	0	0
1:11076820-11078000	AT1G31050,	2	-	0	0	0	0	0	0	0	0	0	0	2	773	1	270	4	307	0	0	0	0	0	0	0	0	0	0	1	0	0	0	0	0	0	0	0	0
1:12195268-12196335	AT1G33615,	3	-	1	13	1	28	0	0	0	0	1	144	1	232	0	0	0	0	1	4	0	0	0	0	0	0	0	0	0	0	3	25	0	0	0	0	0	0
1:14160595-14160909	AT1G37130,	1	-	0	0	0	0	2	1804	1	1669	0	0	0	0	1	2505	2	3032	0	0	0	0	0	0	2	3495	0	0	0	0	0	0	0	0	0	0	0	0
1:17586989-17588428	n/a		+	0	0	1	5	0	0	1	3	0	0	1	54	0	0	0	0	0	0	0	0	0	0	0	0	0	0	0	0	0	0	3	7	2	7	0	0
1:19410385-19410908	AT1G52150,	2	-	0	0	0	0	0	0	1	97	2	756	1	1298	0	0	3	1402	0	0	0	0	0	0	0	0	0	0	0	0	0	0	0	0	0	0	1	213
1:19523595-19523787	AT1G52410,	2	+	0	0	1	97	4	117	3	120	0	0	0	0	0	0	0	0	0	0	0	0	0	0	0	0	0	0	0	0	0	0	0	0	0	0	0	0
1:20294466-20295154	AT1G54370,	5	-	0	0	0	0	0	0	1	109	2	196	0	0	0	0	0	0	1	29	0	0	0	0	0	0	0	0	0	0	1	139	3	229	0	0	0	0
1:20968340-20968489	AT1G56070,	1	-	0	0	0	0	0	0	0	0	1	6187	0	0	2	10804	0	0	0	0	0	0	0	0	0	0	0	0	0	0	0	0	0	0	2	6609	3	6447
1:22337858-22338074	AT1G60640,	2	-	0	0	3	230	0	0	0	0	0	0	0	0	0	0	0	0	0	0	1	46	0	0	0	0	0	0	0	0	4	223	0	0	0	0	0	0
1:23668565-23668818	AT1G63800,	2	-	0	0	0	0	0	0	0	0	4	434	2	804	0	0	2	696	0	0	0	0	0	0	0	0	0	0	0	0	0	0	0	0	0	0	0	0
1:24047381-24047963	AT1G64720,	3	-	0	0	0	0	3	1388	0	0	0	0	0	0	0	0	1	449	0	0	2	6230	0	0	1	13106	0	0	0	0	0	0	1	1856	0	0	0	0
1:2456758-2460261	n/a		+	0	0	0	0	0	0	1	3526	0	0	0	0	2	7798	0	0	0	0	0	0	0	0	0	0	0	0	0	0	3	4086	2	7327	0	0	0	0
1:26056117-26056712	AT1G69310,	2	-	0	0	1	22	0	0	1	27	0	0	1	139	2	192	2	229	0	0	0	0	0	0	1	43	0	0	0	0	0	0	0	0	0	0	0	0
1:28191514-28191900	AT1G75100,	3	-	0	0	0	0	0	0	2	190	0	0	1	23	0	0	0	0	0	0	2	74	0	0	1	221	0	0	0	0	0	0	2	191	0	0	0	0
1:28822537-28822765	AT1G76790,	2	-	3	229	0	0	0	0	0	0	0	0	0	0	0	0	5	3282	0	0	0	0	0	0	0	0	0	0	0	0	0	0	0	0	0	0	0	0
1:2902352-2902711	AT1G09020,	2	-	0	0	0	0	1	214	0	0	3	270	0	0	2	380	1	515	0	0	0	0	0	0	0	0	0	0	0	0	0	0	1	334	0	0	0	0
1:29059011-29061897	AT1G77320,	8	+	0	0	0	0	0	0	0	0	0	0	2	84	2	107	0	0	0	0	0	0	0	0	2	29	0	0	0	0	0	0	0	0	1	39	1	38
1:4609669-4609912	AT1G13440,	2	-	0	0	0	0	2	6305	2	5849	0	0	0	0	0	0	2	13211	0	0	1	2388	0	0	0	0	0	0	0	0	0	0	0	0	1	7790	0	0
1:5774733-5775209	AT1G16880,	3	+	0	0	1	2957	0	0	0	0	0	0	0	0	0	0	0	0	0	0	1	1996	2	1501	2	4591	0	0	0	0	0	0	1	2395	0	0	1	2485
1:6322302-6323495	AT1G18370,	7	-	0	0	1	210	0	0	0	0	0	0	2	505	0	0	2	383	0	0	0	0	0	0	0	0	0	0	0	0	0	0	1	194	0	0	2	133
1:8611523-8611752	AT1G24280,	1	+	0	0	0	0	0	0	0	0	4	111	2	221	0	0	1	209	0	0	0	0	0	0	0	0	0	0	0	0	0	0	1	94	0	0	0	0
1:980778-981160	AT1G03860,	1	-	1	198	0	0	1	329	0	0	1	464	1	509	2	770	0	0	0	0	0	0	0	0	0	0	0	0	0	0	0	0	0	0	0	0	2	423
2:13664746-13669268	n/a		+	0	0	0	0	0	0	0	0	0	0	0	0	1	170	0	0	0	0	0	0	0	0	0	0	0	0	0	0	0	0	0	0	0	0	7	105
2:14798952-14799462	AT2G35110,	3	-	0	0	0	0	2	111	0	0	1	219	0	0	1	416	0	0	0	0	0	0	0	0	1	158	0	0	0	0	0	0	2	155	1	169	0	0
2:16140249-16140468	AT2G38580,	2	+	0	0	0	0	3	75	5	72	0	0	0	0	0	0	0	0	0	0	0	0	0	0	0	0	0	0	0	0	0	0	0	0	0	0	0	0
2:201361-202025	AT2G01450,	2	-	0	0	0	0	2	569	0	0	1	1154	0	0	2	2150	2	2659	0	0	0	0	0	0	0	0	0	0	0	0	0	0	0	0	1	993	0	0
2:5540719-5540872	AT2G13360,	1	+	1	3308	1	5628	1	5458	0	0	0	0	0	0	0	0	0	0	0	0	0	0	0	0	0	0	0	0	0	0	4	2234	0	0	1	3880	0	0
2:9771524-9774999	n/a		+	0	0	0	0	0	0	0	0	0	0	0	0	0	0	0	0	0	0	0	0	0	0	0	0	0	0	0	0	1	126	4	215	1	512	2	415
3:10822825-10993675	n/a		-	0	0	0	0	0	0	0	0	0	0	0	0	0	0	0	0	0	0	0	0	0	0	0	0	0	0	0	0	3	684	0	0	5	2001	0	0
3:16311825-16314032	n/a		+	0	0	0	0	0	0	0	0	1	67	2	103	1	65	0	0	0	0	0	0	0	0	0	0	0	0	0	0	0	0	1	12	2	12	1	8
3:16858849-16859078	AT3G45850,	2	-	0	0	2	258	0	0	0	0	1	346	4	627	0	0	0	0	0	0	0	0	0	0	0	0	0	0	0	0	0	0	1	637	0	0	0	0
3:17281857-17282009	AT3G46920,	1	-	0	0	0	0	0	0	0	0	2	51	0	0	0	0	1	91	0	0	0	0	0	0	0	0	0	0	0	0	4	31	0	0	0	0	1	44
3:17351886-17352035	AT3G47120,	1	-	0	0	1	62	0	0	0	0	0	0	4	214	0	0	0	0	0	0	0	0	0	0	0	0	0	0	0	0	1	65	2	160	0	0	0	0
3:19277923-19278083	AT3G51950,	1	-	0	0	2	629	0	0	0	0	2	1547	2	3695	0	0	0	0	0	0	0	0	0	0	0	0	0	0	0	0	0	0	1	1518	0	0	1	576
3:19988059-19988206	AT3G53980,	1	+	0	0	0	0	0	0	0	0	0	0	0	0	3	33508	5	43721	0	0	0	0	0	0	0	0	0	0	0	0	0	0	0	0	0	0	0	0
3:22036750-22037661	AT3G59660,	4	-	0	0	0	0	0	0	2	72	1	125	3	196	1	315	1	419	0	0	0	0	0	0	0	0	0	0	0	0	0	0	0	0	0	0	0	0
3:2359651-2359891	AT3G07370,	2	-	0	0	1	76	0	0	1	66	4	83	0	0	0	0	1	158	0	0	0	0	0	0	1	137	0	0	0	0	0	0	0	0	0	0	0	0
3:3248149-3248427	AT3G10440,	1	+	0	0	0	0	0	0	0	0	0	0	2	119	0	0	1	155	0	0	0	0	0	0	2	85	0	0	0	0	2	37	1	73	0	0	0	0
3:3777458-3777685	AT3G11930,	1	-	2	208	0	0	0	0	0	0	0	0	0	0	0	0	0	0	1	182	0	0	0	0	3	778	0	0	0	0	0	0	0	0	0	0	2	664
3:7110566-7111284	AT3G20390,	3	-	0	0	0	0	0	0	0	0	0	0	0	0	0	0	3	3921	0	0	0	0	0	0	1	1325	0	0	1	1082	1	783	0	0	0	0	2	1173
3:9492040-9492183	AT3G25920,	1	-	3	3373	2	7484	2	3951	0	0	0	0	0	0	0	0	0	0	0	0	0	0	0	0	0	0	0	0	0	0	0	0	0	0	1	2933	0	0
4:10957705-10958269	AT4G20300,	2	+	2	85	0	0	0	0	0	0	0	0	1	1036	0	0	0	0	0	0	0	0	0	0	0	0	0	0	0	0	0	0	1	656	2	585	2	503
4:11562071-11562312	AT4G21760,	2	+	0	0	1	41	0	0	0	0	4	792	0	0	0	0	2	792	0	0	1	11	0	0	0	0	0	0	0	0	0	0	0	0	0	0	0	0
4:12025004-12025446	AT4G22950,	3	-	0	0	0	0	0	0	0	0	1	135	2	260	4	288	1	412	0	0	0	0	0	0	0	0	0	0	0	0	0	0	0	0	0	0	0	0
4:15267020-15272233	n/a		+	1	175	0	0	0	0	0	0	2	745	0	0	0	0	0	0	0	0	0	0	0	0	0	0	0	0	0	0	0	0	1	943	1	728	3	688
4:15306971-15307263	AT4G31580,	2	+	0	0	0	0	0	0	1	222	0	0	0	0	2	602	2	807	0	0	0	0	0	0	0	0	0	0	0	0	0	0	0	0	2	437	1	408
4:15649690-15651024	AT4G32420,	5	-	0	0	1	181	0	0	1	110	0	0	0	0	1	259	0	0	0	0	3	117	0	0	0	0	0	0	1	77	0	0	0	0	1	233	0	0
4:16624857-16631047	n/a		-	0	0	0	0	0	0	0	0	1	112	0	0	0	0	0	0	0	0	1	94	2	55	3	177	0	0	0	0	0	0	1	181	0	0	0	0
4:17180311-17180619	AT4G36360,	2	-	1	211	0	0	0	0	0	0	0	0	1	3031	2	2085	0	0	0	0	0	0	0	0	0	0	0	0	0	0	0	0	0	0	2	1745	2	1650
4:17241256-17241589	AT4G36530,	2	-	0	0	0	0	2	441	1	416	0	0	0	0	0	0	0	0	0	0	0	0	0	0	0	0	0	0	0	0	1	210	1	349	2	443	1	452
4:2396097-2406462	n/a		-	0	0	0	0	0	0	0	0	0	0	0	0	0	0	3	344	0	0	1	104	0	0	1	257	0	0	0	0	0	0	0	0	3	157	0	0
4:6526748-6527639	AT4G10570,	4	-	0	0	0	0	1	67	0	0	2	125	2	155	1	196	0	0	0	0	0	0	0	0	1	66	0	0	0	0	0	0	0	0	1	166	0	0
4:6664265-6666001	n/a		+	0	0	0	0	0	0	0	0	0	0	3	125	2	95	3	132	0	0	0	0	0	0	0	0	0	0	0	0	0	0	0	0	0	0	0	0
4:8250488-8251167	AT4G14340,	4	-	0	0	0	0	0	0	1	103	1	189	1	300	0	0	2	414	0	0	0	0	0	0	1	156	0	0	0	0	0	0	0	0	1	175	1	179
5:1252684-1253134	AT5G04430,	2	-	0	0	1	774	0	0	0	0	0	0	0	0	1	986	0	0	0	0	0	0	3	254	1	807	0	0	1	393	1	547	0	0	0	0	0	0
5:14233461-14233790	AT5G36160,	2	-	0	0	0	0	0	0	0	0	0	0	3	836	0	0	1	634	0	0	0	0	0	0	1	530	0	0	0	0	0	0	1	435	2	694	0	0
5:14740562-14741529	n/a		-	0	0	0	0	0	0	0	0	4	23	2	60	1	45	1	52	0	0	0	0	0	0	0	0	0	0	0	0	0	0	0	0	0	0	0	0
5:14752237-14752500	AT5G37260,	2	-	0	0	0	0	0	0	0	0	0	0	1	262	1	115	5	164	0	0	0	0	0	0	1	58	0	0	0	0	0	0	0	0	0	0	0	0
5:1498763-1500083	AT5G05080,	6	-	0	0	1	588	0	0	0	0	0	0	0	0	0	0	0	0	0	0	0	0	0	0	0	0	0	0	0	0	2	458	0	0	4	766	1	726
5:15904928-15905150	AT5G39740,	2	+	0	0	0	0	0	0	0	0	0	0	0	0	2	6485	0	0	0	0	0	0	0	0	0	0	1	1543	0	0	2	5085	3	10340	0	0	0	0
5:15999457-15999672	AT5G39970,	1	+	0	0	0	0	0	0	0	0	2	51	2	98	3	108	1	141	0	0	0	0	0	0	0	0	0	0	0	0	0	0	0	0	0	0	0	0
5:18831246-18831452	AT5G46420,	2	+	1	444	0	0	0	0	0	0	0	0	0	0	0	0	0	0	0	0	2	532	0	0	0	0	0	0	0	0	0	0	4	785	1	570	0	0
5:2167784-2168109	AT5G06980,	1	+	0	0	0	0	2	570	0	0	0	0	0	0	0	0	0	0	0	0	1	106	0	0	4	168	0	0	0	0	0	0	0	0	1	942	0	0
5:22681836-22687045	n/a		+	0	0	0	0	0	0	0	0	0	0	0	0	3	3840	5	4570	0	0	0	0	0	0	0	0	0	0	0	0	0	0	0	0	0	0	0	0
5:24297871-24298832	AT5G60410,	3	+	0	0	0	0	0	0	1	228	0	0	2	520	0	0	1	669	0	0	0	0	0	0	1	526	2	155	1	155	0	0	0	0	0	0	0	0
5:24598413-24599125	AT5G61140,	3	+	0	0	2	86	0	0	1	83	0	0	0	0	0	0	1	295	1	17	0	0	0	0	0	0	0	0	0	0	2	90	0	0	1	140	0	0
5:25665304-25666171	AT5G64130,	2	+	2	465	0	0	1	891	0	0	0	0	0	0	0	0	4	2396	0	0	0	0	0	0	0	0	0	0	0	0	0	0	1	1346	0	0	0	0
5:6671815-6672618	AT5G19730,	3	+	0	0	1	53	0	0	1	32	0	0	0	0	0	0	0	0	1	4	0	0	2	14	3	52	0	0	0	0	0	0	0	0	0	0	0	0
5:6787547-6787816	AT5G20090,	2	-	0	0	0	0	0	0	1	649	3	1014	1	1348	0	0	0	0	0	0	0	0	0	0	2	545	0	0	0	0	0	0	1	1090	0	0	0	0
5:7015574-7015779	AT5G20720,	2	+	0	0	0	0	3	3401	0	0	2	1019	0	0	0	0	0	0	0	0	3	1154	0	0	0	0	0	0	0	0	0	0	0	0	0	0	0	0
5:7883393-7883599	AT5G23405,	2	-	0	0	0	0	0	0	0	0	0	0	6	294	0	0	0	0	0	0	0	0	0	0	0	0	0	0	0	0	0	0	0	0	0	0	2	138
5:9285162-9285341	AT5G26742,	1	-	0	0	2	1243	4	808	1	908	0	0	0	0	0	0	0	0	0	0	0	0	0	0	0	0	0	0	0	0	0	0	0	0	1	619	0	0
Mt:350660-350884	ATMG01360,	1	+	0	0	0	0	0	0	1	10070	0	0	0	0	2	35254	0	0	0	0	0	0	0	0	0	0	0	0	0	0	3	11147	0	0	2	28544	0	0
Pt:557-764	ATCG00020,	1	+	0	0	0	0	8	9098929	0	0	0	0	0	0	0	0	0	0	0	0	0	0	0	0	0	0	0	0	0	0	0	0	0	0	0	0	0	0
1:10072181-10074913	n/a		-	0	0	0	0	3	161	2	152	0	0	0	0	1	14	1	26	0	0	0	0	0	0	0	0	0	0	0	0	0	0	0	0	0	0	0	0
1:10812007-10812393	AT1G30520,	2	+	0	0	0	0	2	188	0	0	0	0	0	0	0	0	0	0	2	33	1	63	0	0	0	0	0	0	0	0	0	0	1	225	0	0	1	164
1:11269590-11270042	AT1G31480,	3	+	1	39	0	0	1	73	1	70	0	0	0	0	1	178	2	227	0	0	1	45	0	0	0	0	0	0	0	0	0	0	0	0	0	0	0	0
1:11398615-11398910	AT1G31800,	2	+	0	0	0	0	2	457	0	0	0	0	1	225	1	168	0	0	0	0	0	0	0	0	1	881	0	0	0	0	1	347	0	0	0	0	1	453
1:12145684-12145942	AT1G33470,	1	+	0	0	0	0	0	0	0	0	0	0	1	1467	1	1677	1	2194	0	0	1	93	0	0	0	0	0	0	0	0	0	0	0	0	1	499	2	455
1:12550957-12551419	AT1G34370,	1	+	0	0	0	0	0	0	0	0	0	0	3	720	0	0	2	788	0	0	1	172	0	0	0	0	0	0	0	0	1	181	0	0	0	0	0	0
1:1431807-1432518	AT1G05010,	2	-	0	0	0	0	1	4938	2	4383	0	0	0	0	0	0	0	0	0	0	0	0	0	0	2	2611	2	1412	0	0	0	0	0	0	0	0	0	0
1:17482513-17483193	AT1G47570,	3	+	0	0	0	0	3	50	0	0	0	0	2	210	1	214	0	0	0	0	0	0	0	0	0	0	0	0	0	0	0	0	0	0	1	130	0	0
1:19522099-19523642	AT1G52410,	11	+	0	0	0	0	0	0	0	0	0	0	0	0	7	1021	0	0	0	0	0	0	0	0	0	0	0	0	0	0	0	0	0	0	0	0	0	0
1:19522247-19523357	AT1G52410,	8	+	0	0	0	0	0	0	0	0	0	0	0	0	0	0	0	0	0	0	0	0	0	0	0	0	0	0	0	0	0	0	7	1169	0	0	0	0
1:19522858-19523357	AT1G52410,	4	+	0	0	0	0	0	0	0	0	2	736	0	0	0	0	5	1253	0	0	0	0	0	0	0	0	0	0	0	0	0	0	0	0	0	0	0	0
1:19739138-19739505	AT1G52980,	2	+	0	0	0	0	0	0	1	293	0	0	0	0	0	0	2	1161	0	0	1	139	1	93	0	0	1	106	0	0	0	0	0	0	1	502	0	0
1:19940347-19950873	n/a		+	0	0	0	0	0	0	0	0	4	403	0	0	0	0	0	0	0	0	0	0	0	0	0	0	0	0	0	0	1	145	0	0	2	145	0	0
1:21165418-21165663	AT1G56500,	2	+	0	0	0	0	0	0	3	277	0	0	0	0	1	64	0	0	0	0	0	0	0	0	0	0	0	0	0	0	1	88	0	0	0	0	2	151
1:22338319-22338526	AT1G60640,	2	-	0	0	0	0	1	94	0	0	0	0	2	608	0	0	0	0	0	0	0	0	0	0	2	161	0	0	0	0	1	223	1	492	0	0	0	0
1:22665289-22685702	n/a		-	0	0	0	0	0	0	0	0	0	0	1	35	0	0	3	52	0	0	0	0	0	0	2	21	0	0	0	0	0	0	1	23	0	0	0	0
1:25367652-25368004	AT1G67680,	1	-	0	0	1	278	1	250	1	250	0	0	1	827	1	696	0	0	0	0	0	0	0	0	0	0	0	0	1	129	0	0	0	0	0	0	1	447
1:26536042-26536517	AT1G70410,	2	-	0	0	0	0	0	0	1	912	0	0	1	813	0	0	0	0	0	0	0	0	0	0	2	1599	0	0	2	686	0	0	0	0	0	0	1	484
1:27847591-27850376	n/a		-	0	0	0	0	0	0	0	0	0	0	0	0	0	0	0	0	0	0	0	0	0	0	0	0	0	0	0	0	0	0	0	0	7	3289	0	0
1:28958745-28958994	AT1G77080,	2	+	0	0	2	246	0	0	0	0	0	0	0	0	0	0	0	0	0	0	0	0	0	0	0	0	0	0	1	138	2	360	0	0	0	0	2	586
1:30047900-30048203	AT1G79880,	1	-	0	0	0	0	0	0	0	0	0	0	0	0	0	0	2	215	0	0	0	0	0	0	0	0	0	0	3	40	0	0	0	0	2	90	0	0
1:3536387-3536548	AT1G10670,	1	+	0	0	0	0	0	0	0	0	0	0	0	0	0	0	2	1540	0	0	1	354	0	0	1	629	0	0	0	0	2	837	0	0	0	0	1	1908
1:4187800-4187970	AT1G12320,AT1G12310,	1	+	0	0	0	0	0	0	2	616	0	0	0	0	0	0	0	0	0	0	0	0	0	0	0	0	0	0	0	0	0	0	0	0	0	0	5	1553
1:5141005-5141696	AT1G14910,	4	-	0	0	1	114	0	0	0	0	0	0	1	481	0	0	1	598	0	0	0	0	0	0	0	0	0	0	0	0	0	0	3	272	0	0	1	233
1:5170212-5170363	AT1G15002,	1	-	0	0	0	0	1	2562	0	0	0	0	0	0	2	6639	1	7521	0	0	0	0	0	0	0	0	0	0	0	0	0	0	0	0	3	6246	0	0
1:5576753-5577088	AT1G16300,	2	+	0	0	0	0	0	0	0	0	2	143	0	0	0	0	3	352	0	0	0	0	0	0	0	0	0	0	0	0	0	0	1	88	1	106	0	0
1:5606377-5609833	n/a		+	0	0	0	0	0	0	0	0	0	0	0	0	0	0	0	0	0	0	0	0	1	932	5	3127	1	938	0	0	0	0	0	0	0	0	0	0
2:10500863-10502367	AT2G24690,	4	-	0	0	0	0	0	0	0	0	1	122	0	0	0	0	0	0	0	0	0	0	4	59	0	0	1	24	0	0	0	0	1	176	0	0	0	0
2:1072474-1072845	AT2G03530,	2	+	0	0	0	0	0	0	0	0	2	59	0	0	1	135	3	178	0	0	0	0	0	0	0	0	0	0	0	0	0	0	1	144	0	0	0	0
2:12459133-12464548	n/a		+	0	0	0	0	0	0	0	0	2	9	4	23	0	0	1	3	0	0	0	0	0	0	0	0	0	0	0	0	0	0	0	0	0	0	0	0
2:12590541-12592571	n/a		+	0	0	0	0	0	0	0	0	0	0	0	0	0	0	0	0	0	0	0	0	0	0	5	1152	0	0	1	242	0	0	0	0	1	399	0	0
2:13271986-13272130	AT2G31141,	1	-	0	0	0	0	0	0	0	0	0	0	0	0	0	0	0	0	0	0	0	0	0	0	0	0	0	0	0	0	0	0	0	0	7	362277	0	0
2:13561602-13563811	AT2G31902,	5	+	0	0	1	13	1	23	0	0	0	0	0	0	0	0	2	404	0	0	0	0	0	0	2	62	0	0	0	0	0	0	0	0	0	0	1	75
2:13635790-13636332	AT2G32040,	3	+	0	0	0	0	3	138	0	0	2	113	0	0	0	0	0	0	0	0	0	0	0	0	0	0	0	0	0	0	0	0	0	0	2	158	0	0
2:14355448-14356826	AT2G33980,	2	-	1	18	0	0	0	0	0	0	0	0	0	0	0	0	5	96	0	0	0	0	0	0	0	0	0	0	0	0	0	0	1	68	0	0	0	0
2:14522701-14522883	AT2G08665,AT2G34420,	1	-	0	0	1	37515	0	0	1	83307	0	0	0	0	0	0	0	0	3	39815	0	0	0	0	0	0	0	0	0	0	2	23081	0	0	0	0	0	0
2:16089235-16089706	AT2G38410,	3	-	0	0	0	0	0	0	0	0	0	0	2	320	0	0	3	307	0	0	0	0	0	0	2	185	0	0	0	0	0	0	0	0	0	0	0	0
2:18227040-18227179	AT2G44060,	1	+	0	0	0	0	0	0	0	0	2	1833	0	0	2	3289	0	0	0	0	0	0	0	0	0	0	0	0	0	0	0	0	0	0	3	2444	0	0
2:698600-698987	AT2G02570,	2	-	0	0	1	396	0	0	0	0	3	454	0	0	1	589	2	764	0	0	0	0	0	0	0	0	0	0	0	0	0	0	0	0	0	0	0	0
2:8688027-8690940	n/a		-	0	0	0	0	0	0	0	0	0	0	0	0	0	0	7	465	0	0	0	0	0	0	0	0	0	0	0	0	0	0	0	0	0	0	0	0
2:952466-952954	AT2G03150,	1	+	0	0	0	0	2	118	1	144	1	188	2	304	0	0	0	0	0	0	0	0	0	0	0	0	0	0	1	69	0	0	0	0	0	0	0	0
2:9690536-9690899	AT2G22780,	3	-	0	0	0	0	0	0	1	237	1	840	0	0	2	1047	1	1384	0	0	1	227	0	0	0	0	0	0	0	0	1	245	0	0	0	0	0	0
3:10609271-10621523	n/a		+	0	0	0	0	1	11	0	0	0	0	0	0	0	0	2	23	0	0	0	0	0	0	0	0	0	0	0	0	0	0	0	0	0	0	4	12
3:11922788-11923075	AT3G30300,	2	-	1	45	1	83	0	0	0	0	1	125	0	0	0	0	0	0	0	0	0	0	0	0	0	0	1	68	0	0	0	0	0	0	1	252	2	262
3:1259771-1260301	AT3G04630,	3	+	1	170	0	0	0	0	0	0	1	859	3	1305	0	0	1	1327	0	0	1	74	0	0	0	0	0	0	0	0	0	0	0	0	0	0	0	0
3:1263468-1263677	AT3G04650,	1	+	0	0	0	0	0	0	0	0	1	30	1	59	1	68	1	66	0	0	1	88	0	0	0	0	1	115	0	0	1	140	0	0	0	0	0	0
3:15779174-15800363	n/a		-	0	0	0	0	0	0	1	1503	0	0	0	0	0	0	5	4284	0	0	0	0	0	0	1	785	0	0	0	0	0	0	0	0	0	0	0	0
3:15870261-15870645	AT3G44110,	2	-	0	0	0	0	0	0	1	792	2	1840	0	0	2	2633	2	3605	0	0	0	0	0	0	0	0	0	0	0	0	0	0	0	0	0	0	0	0
3:16168587-16168849	AT3G44600,	2	-	2	60	0	0	0	0	0	0	0	0	1	242	2	253	0	0	0	0	0	0	0	0	0	0	0	0	0	0	0	0	0	0	1	217	1	174
3:1621792-1622122	AT3G05590,	2	+	1	1632	0	0	0	0	1	2930	0	0	0	0	0	0	2	6882	0	0	0	0	0	0	1	962	0	0	0	0	1	3347	0	0	1	4918	0	0
3:1622471-1622652	AT3G05590,	2	+	0	0	0	0	1	3246	2	3147	2	3807	0	0	1	6008	1	7751	0	0	0	0	0	0	0	0	0	0	0	0	0	0	0	0	0	0	0	0
3:16858690-16859078	AT3G45850,	3	-	0	0	0	0	1	235	0	0	0	0	0	0	1	384	1	496	0	0	0	0	1	194	0	0	0	0	0	0	0	0	2	671	0	0	1	331
3:17173528-17174701	n/a		-	0	0	0	0	0	0	0	0	1	30	4	36	1	39	0	0	0	0	0	0	0	0	0	0	1	3	0	0	0	0	0	0	0	0	0	0
3:17493843-17494109	AT3G47470,	1	-	0	0	1	35322	0	0	0	0	0	0	0	0	0	0	0	0	1	19077	3	53852	0	0	0	0	0	0	1	44764	0	0	1	26134	0	0	0	0
3:18408998-18409272	AT3G49650,	2	-	0	0	0	0	0	0	1	94	1	44	1	56	0	0	1	78	0	0	1	24	1	12	0	0	0	0	1	15	0	0	0	0	0	0	0	0
3:18754715-18754944	AT3G50530,	2	+	0	0	0	0	0	0	0	0	1	736	3	1406	0	0	1	847	0	0	0	0	0	0	0	0	0	0	0	0	1	395	0	0	0	0	1	508
3:18800911-18801224	AT3G50630,	2	+	0	0	0	0	0	0	1	66	0	0	1	337	0	0	0	0	0	0	0	0	0	0	0	0	0	0	0	0	0	0	2	464	1	266	2	249
3:20650520-20651295	AT3G55660,	3	-	0	0	1	123	1	57	0	0	1	163	2	236	1	188	0	0	0	0	0	0	0	0	0	0	0	0	0	0	1	53	0	0	0	0	0	0
3:20703510-20703933	AT3G55770,	2	+	0	0	0	0	0	0	0	0	0	0	1	4007	0	0	3	4476	0	0	0	0	0	0	0	0	0	0	0	0	1	1130	0	0	2	1762	0	0
3:21964170-21966497	AT3G59430,	3	-	0	0	0	0	1	25	0	0	1	53	3	78	1	77	0	0	0	0	0	0	0	0	0	0	0	0	0	0	1	29	0	0	0	0	0	0
3:22727471-22729216	AT3G61420,	8	-	0	0	1	64	0	0	0	0	0	0	2	342	0	0	0	0	0	0	0	0	2	83	0	0	2	80	0	0	0	0	0	0	0	0	0	0
3:23037495-23037758	AT3G62250,	1	+	2	1459	0	0	0	0	0	0	0	0	0	0	0	0	0	0	0	0	0	0	0	0	0	0	0	0	0	0	0	0	0	0	5	5106	0	0
3:3340127-3340668	AT3G10690,	3	-	0	0	1	259	0	0	0	0	2	83	0	0	2	228	1	272	0	0	0	0	0	0	0	0	0	0	0	0	0	0	0	0	1	163	0	0
3:3780027-3781617	AT3G11945,	7	-	0	0	0	0	1	431	1	360	0	0	1	153	0	0	0	0	0	0	0	0	2	92	1	281	0	0	0	0	1	176	0	0	0	0	0	0
3:4298674-4305251	n/a		+	0	0	0	0	0	0	0	0	2	148	1	199	2	483	0	0	0	0	0	0	0	0	0	0	0	0	0	0	0	0	0	0	1	239	1	243
3:4819304-4822309	n/a		+	0	0	0	0	3	3780	2	3680	0	0	0	0	0	0	0	0	0	0	0	0	0	0	0	0	0	0	0	0	0	0	2	1719	0	0	0	0
3:5400054-5400258	AT3G15950,	2	-	0	0	0	0	4	965	0	0	0	0	0	0	3	2204	0	0	0	0	0	0	0	0	0	0	0	0	0	0	0	0	0	0	0	0	0	0
3:5580020-5580184	AT3G16420,	1	+	0	0	0	0	2	4557	0	0	0	0	4	22664	1	9658	0	0	0	0	0	0	0	0	0	0	0	0	0	0	0	0	0	0	0	0	0	0
3:6927024-6928252	AT3G19910,	4	+	0	0	1	169	0	0	0	0	2	588	2	1096	0	0	0	0	0	0	0	0	0	0	1	258	0	0	0	0	0	0	0	0	1	203	0	0
3:9098109-9098809	AT3G24890,	3	+	0	0	0	0	0	0	0	0	0	0	1	126	2	148	4	193	0	0	0	0	0	0	0	0	0	0	0	0	0	0	0	0	0	0	0	0
3:9275472-9275627	AT3G25540,	1	+	0	0	1	134	0	0	0	0	0	0	1	405	1	357	1	476	2	31	0	0	0	0	0	0	0	0	0	0	0	0	0	0	0	0	1	169
4:1003629-1003983	AT4G02290,	2	-	0	0	0	0	0	0	0	0	0	0	2	12749	2	6911	0	0	0	0	0	0	0	0	0	0	0	0	0	0	0	0	0	0	1	1482	2	1437
4:11931425-11936629	n/a		+	0	0	0	0	0	0	0	0	0	0	0	0	0	0	7	5558	0	0	0	0	0	0	0	0	0	0	0	0	0	0	0	0	0	0	0	0
4:1318913-1473003	n/a		+	0	0	0	0	0	0	0	0	0	0	0	0	0	0	7	97094	0	0	0	0	0	0	0	0	0	0	0	0	0	0	0	0	0	0	0	0
4:13234534-13234904	AT4G26110,	2	+	0	0	1	777	0	0	0	0	1	1175	1	2056	0	0	0	0	0	0	0	0	0	0	2	517	0	0	0	0	0	0	2	1483	0	0	0	0
4:14341704-14342433	AT4G29100,	2	+	0	0	0	0	0	0	0	0	0	0	0	0	3	2699	1	3417	0	0	0	0	0	0	0	0	0	0	2	68	0	0	0	0	1	311	0	0
4:15076582-15077410	AT4G30975,	3	+	1	6	0	0	0	0	0	0	0	0	2	76	1	48	3	57	0	0	0	0	0	0	0	0	0	0	0	0	0	0	0	0	0	0	0	0
4:15611063-15611305	AT4G32330,	2	+	0	0	0	0	0	0	0	0	0	0	0	0	0	0	4	1839	0	0	0	0	0	0	0	0	0	0	0	0	0	0	0	0	0	0	3	569
4:15973477-15976485	n/a		-	0	0	0	0	0	0	1	213	0	0	0	0	3	33	2	39	0	0	0	0	0	0	0	0	0	0	0	0	0	0	1	134	0	0	0	0
4:16177206-16177454	AT4G33700,	2	-	0	0	0	0	0	0	0	0	1	266	0	0	0	0	2	620	1	41	0	0	0	0	0	0	0	0	0	0	0	0	0	0	2	298	1	302
4:16836849-16837057	AT4G35440,	1	-	0	0	0	0	1	98	0	0	0	0	0	0	0	0	0	0	0	0	0	0	0	0	0	0	0	0	1	90	1	83	0	0	1	122	3	134
4:4201887-4202147	AT4G07410,	1	-	0	0	1	162	0	0	0	0	0	0	0	0	2	687	2	868	0	0	0	0	0	0	0	0	0	0	1	88	0	0	0	0	0	0	1	286
4:457367-457563	AT4G01050,	2	+	0	0	4	2403	0	0	0	0	0	0	0	0	0	0	0	0	0	0	3	1662	0	0	0	0	0	0	0	0	0	0	0	0	0	0	0	0
4:6052927-6053097	AT4G09580,	1	-	0	0	0	0	0	0	0	0	1	219	0	0	0	0	1	611	1	28	0	0	0	0	0	0	3	46	0	0	0	0	1	162	0	0	0	0
4:6408473-6408666	AT4G10340,	2	+	1	24277	0	0	2	53788	0	0	0	0	0	0	0	0	0	0	1	20664	0	0	0	0	0	0	0	0	0	0	0	0	0	0	2	21909	1	17947
4:8218498-8218778	AT4G14270,	1	+	0	0	0	0	1	506	1	436	1	3026	0	0	0	0	3	4837	0	0	0	0	0	0	0	0	0	0	0	0	0	0	1	1460	0	0	0	0
4:8259404-8260084	AT4G14350,	2	-	0	0	0	0	0	0	0	0	0	0	6	1007	0	0	0	0	0	0	1	144	0	0	0	0	0	0	0	0	0	0	0	0	0	0	0	0
5:17615246-17615388	AT5G43810,	1	+	0	0	1	191	0	0	1	154	0	0	1	384	0	0	0	0	0	0	1	90	0	0	2	244	0	0	0	0	0	0	1	382	0	0	0	0
5:19271916-19272745	AT5G47500,	3	-	0	0	0	0	0	0	0	0	0	0	2	562	2	367	1	529	0	0	0	0	0	0	0	0	0	0	0	0	0	0	0	0	0	0	2	428
5:19528776-19528922	AT5G48160,	1	-	0	0	1	287	0	0	0	0	0	0	2	1461	0	0	2	913	0	0	0	0	0	0	0	0	2	201	0	0	0	0	0	0	0	0	0	0
5:21811769-21814216	AT5G53740,	6	-	0	0	0	0	0	0	0	0	0	0	0	0	5	6794	1	7798	0	0	0	0	0	0	0	0	0	0	0	0	0	0	0	0	0	0	1	3168
5:2265940-2266086	AT5G07220,	1	-	0	0	2	166	0	0	0	0	0	0	2	804	0	0	0	0	0	0	1	186	0	0	1	517	0	0	0	0	1	216	0	0	0	0	0	0
5:2600733-2602216	AT5G08120,	3	-	0	0	1	87	0	0	0	0	1	164	1	197	1	273	2	359	0	0	0	0	0	0	0	0	0	0	0	0	0	0	0	0	0	0	1	200
5:26059020-26060681	AT5G65210,	8	+	0	0	0	0	0	0	0	0	2	1104	5	2096	0	0	0	0	0	0	0	0	0	0	0	0	0	0	0	0	0	0	0	0	0	0	0	0
5:3005360-3015074	n/a		+	0	0	0	0	1	27741	0	0	0	0	0	0	4	119641	0	0	0	0	0	0	0	0	0	0	0	0	0	0	0	0	0	0	2	116575	0	0
5:3927058-3927276	AT5G12150,	1	-	0	0	0	0	1	533	0	0	1	386	2	664	0	0	0	0	0	0	0	0	0	0	1	824	1	286	1	274	0	0	0	0	0	0	0	0
5:4865208-4865571	AT5G15020,	2	-	0	0	0	0	0	0	0	0	1	331	0	0	0	0	0	0	0	0	0	0	0	0	4	555	0	0	0	0	0	0	1	514	1	330	0	0
5:5210399-5212252	n/a		+	0	0	0	0	3	1399	0	0	0	0	0	0	0	0	0	0	1	6049	0	0	0	0	0	0	2	1468	0	0	0	0	1	2672	0	0	0	0
5:6511067-6512013	AT5G19330,	5	-	0	0	0	0	0	0	1	261	0	0	1	819	0	0	2	1311	0	0	1	168	1	110	0	0	0	0	0	0	0	0	0	0	1	423	0	0
5:6683519-6688150	n/a		-	0	0	0	0	0	0	0	0	3	2655	0	0	0	0	0	0	0	0	1	776	0	0	0	0	0	0	0	0	2	1397	0	0	0	0	1	1756
5:7398011-7398451	AT5G22350,	3	-	0	0	0	0	0	0	0	0	0	0	0	0	1	308	2	409	0	0	0	0	0	0	0	0	0	0	0	0	0	0	1	266	1	193	2	172
5:8737635-8737981	AT5G25220,	2	+	0	0	0	0	0	0	0	0	2	463	0	0	1	410	0	0	0	0	0	0	1	264	1	787	0	0	0	0	0	0	1	820	0	0	1	383
5:891722-891934	AT5G03540,	1	+	0	0	0	0	0	0	0	0	1	397	0	0	1	652	2	861	0	0	0	0	0	0	1	455	0	0	0	0	1	186	0	0	1	292	0	0
5:9447745-9448181	AT5G26850,	1	+	0	0	0	0	0	0	0	0	0	0	0	0	0	0	0	0	1	29	0	0	0	0	0	0	3	80	0	0	0	0	2	546	1	866	0	0
5:9862215-9862537	AT5G27830,	1	+	0	0	0	0	1	62	0	0	2	208	0	0	0	0	0	0	1	33	0	0	0	0	2	303	0	0	0	0	0	0	1	243	0	0	0	0
Mt:349819-349959	n/a		-	0	0	0	0	0	0	0	0	0	0	0	0	0	0	7	40960	0	0	0	0	0	0	0	0	0	0	0	0	0	0	0	0	0	0	0	0
Mt:40483-41982	n/a		-	0	0	0	0	1	6124	2	5998	0	0	0	0	0	0	3	23223	1	1561	0	0	0	0	0	0	0	0	0	0	0	0	0	0	0	0	0	0
Pt:1192-13437	n/a		+	0	0	0	0	0	0	7	3667167	0	0	0	0	0	0	0	0	0	0	0	0	0	0	0	0	0	0	0	0	0	0	0	0	0	0	0	0
Pt:55772-55921	ATCG00490,	1	+	0	0	0	0	0	0	7	1680574	0	0	0	0	0	0	0	0	0	0	0	0	0	0	0	0	0	0	0	0	0	0	0	0	0	0	0	0
Pt:844-38912	n/a		-	0	0	0	0	7	4194432	0	0	0	0	0	0	0	0	0	0	0	0	0	0	0	0	0	0	0	0	0	0	0	0	0	0	0	0	0	0
Pt:940-1162	ATCG00020,	1	+	0	0	0	0	0	0	0	0	0	0	0	0	0	0	0	0	0	0	0	0	0	0	7	11860042	0	0	0	0	0	0	0	0	0	0	0	0
1:1079246-1079779	AT1G04140,	3	-	0	0	0	0	0	0	0	0	4	652	0	0	1	830	0	0	0	0	0	0	0	0	0	0	0	0	0	0	0	0	0	0	1	417	0	0
1:10888656-10888856	AT1G30690,	1	+	0	0	0	0	0	0	0	0	0	0	0	0	0	0	0	0	0	0	0	0	0	0	0	0	0	0	0	0	0	0	0	0	6	656	0	0
1:12600510-12601145	AT1G34460,	2	+	0	0	0	0	0	0	0	0	0	0	0	0	3	40	3	48	0	0	0	0	0	0	0	0	0	0	0	0	0	0	0	0	0	0	0	0
1:14159848-14160218	AT1G37130,	2	+	2	837	1	2073	0	0	1	1371	1	866	0	0	0	0	0	0	1	554	0	0	0	0	0	0	0	0	0	0	0	0	0	0	0	0	0	0
1:14160613-14160909	AT1G37130,	1	-	0	0	0	0	1	1781	0	0	0	0	0	0	1	2528	1	3041	0	0	0	0	0	0	3	3331	0	0	0	0	0	0	0	0	0	0	0	0
1:16267892-16268048	AT1G43170,	1	+	0	0	1	6680	0	0	0	0	0	0	1	10372	0	0	0	0	0	0	0	0	0	0	0	0	0	0	0	0	1	4950	2	9606	0	0	1	6376
1:16797274-16797830	AT1G44170,	3	-	0	0	0	0	0	0	0	0	0	0	1	1320	0	0	3	969	0	0	0	0	0	0	0	0	1	70	0	0	0	0	0	0	0	0	1	840
1:17158774-17160881	n/a		-	0	0	0	0	0	0	0	0	2	69	0	0	3	129	0	0	0	0	0	0	0	0	0	0	0	0	0	0	0	0	1	100	0	0	0	0
1:17932980-17934248	AT1G48500,	5	+	0	0	0	0	0	0	0	0	0	0	0	0	2	153	4	184	0	0	0	0	0	0	0	0	0	0	0	0	0	0	0	0	0	0	0	0
1:19522247-19522759	AT1G52410,	4	+	0	0	0	0	0	0	0	0	0	0	4	1863	0	0	0	0	0	0	0	0	0	0	0	0	0	0	0	0	0	0	0	0	2	1049	0	0
1:20135800-20135940	AT1G53910,	1	+	0	0	0	0	0	0	1	675	0	0	0	0	0	0	5	4748	0	0	0	0	0	0	0	0	0	0	0	0	0	0	0	0	0	0	0	0
1:20809425-20809584	AT1G55690,	1	-	0	0	0	0	0	0	0	0	0	0	0	0	0	0	0	0	0	0	0	0	0	0	2	78	0	0	0	0	1	208	2	357	0	0	1	317
1:22338009-22338233	AT1G60640,	2	-	0	0	0	0	0	0	0	0	0	0	3	700	0	0	3	515	0	0	0	0	0	0	0	0	0	0	0	0	0	0	0	0	0	0	0	0
1:22355351-22355578	AT1G60710,	2	-	0	0	1	517	0	0	0	0	0	0	5	3738	0	0	0	0	0	0	0	0	0	0	0	0	0	0	0	0	0	0	0	0	0	0	0	0
1:26021340-26022532	AT1G69220,	4	-	0	0	0	0	0	0	0	0	0	0	0	0	0	0	1	526	0	0	0	0	0	0	4	160	0	0	0	0	0	0	0	0	1	148	0	0
1:26132140-26132533	AT1G69526,	1	+	0	0	1	19	1	27	0	0	0	0	0	0	0	0	0	0	0	0	1	13	1	6	2	33	0	0	0	0	0	0	0	0	0	0	0	0
1:26627743-26630303	AT1G70620,	8	+	0	0	0	0	0	0	0	0	0	0	0	0	0	0	1	548	0	0	1	105	2	115	0	0	0	0	0	0	2	84	0	0	0	0	0	0
1:27275645-27276058	AT1G72450,	2	-	0	0	0	0	0	0	0	0	0	0	0	0	0	0	1	3092	0	0	0	0	0	0	0	0	3	2986	0	0	0	0	0	0	0	0	2	975
1:28063844-28064527	AT1G74690,	2	-	0	0	0	0	0	0	0	0	0	0	0	0	0	0	0	0	0	0	1	227	0	0	0	0	0	0	0	0	2	609	3	1396	0	0	0	0
1:28152512-28153283	AT1G74960,	4	-	0	0	0	0	0	0	0	0	0	0	1	353	0	0	1	418	0	0	0	0	2	122	0	0	0	0	0	0	0	0	0	0	2	432	0	0
1:29660399-29661085	AT1G78900,	3	+	0	0	0	0	1	1727	0	0	0	0	2	3162	1	2807	1	3600	0	0	0	0	0	0	0	0	1	1200	0	0	0	0	0	0	0	0	0	0
1:29954420-29956356	AT1G79610,	12	-	0	0	0	0	0	0	0	0	0	0	1	225	0	0	2	387	0	0	1	58	0	0	0	0	0	0	0	0	0	0	0	0	2	298	0	0
1:30312632-30312873	AT1G80640,	1	+	0	0	0	0	2	225	2	221	0	0	0	0	0	0	0	0	0	0	0	0	0	0	0	0	0	0	0	0	2	190	0	0	0	0	0	0
1:3255273-3255410	AT1G09970,	1	+	0	0	0	0	0	0	1	338	0	0	1	3106	0	0	4	3585	0	0	0	0	0	0	0	0	0	0	0	0	0	0	0	0	0	0	0	0
1:3997309-3997536	AT1G11840,	2	+	0	0	1	1731	0	0	0	0	0	0	0	0	2	12384	2	16079	0	0	1	1172	0	0	0	0	0	0	0	0	0	0	0	0	0	0	0	0
1:453730-456231	n/a		+	0	0	0	0	0	0	0	0	2	667	1	1095	0	0	0	0	0	0	0	0	0	0	2	558	0	0	0	0	0	0	1	738	0	0	0	0
1:4761112-4761256	AT1G13930,	1	+	0	0	0	0	0	0	0	0	2	8311	3	12019	1	10082	0	0	0	0	0	0	0	0	0	0	0	0	0	0	0	0	0	0	0	0	0	0
1:5177963-5179849	AT1G15030,	6	+	0	0	0	0	0	0	0	0	0	0	0	0	0	0	4	572	0	0	0	0	0	0	0	0	0	0	0	0	0	0	1	214	0	0	1	272
1:5221827-5225534	n/a		+	0	0	0	0	0	0	1	116	0	0	0	0	1	24	1	45	0	0	0	0	0	0	0	0	0	0	0	0	0	0	0	0	2	51	1	58
1:5297892-5298122	AT1G05163,AT1G15405,	1	+	0	0	0	0	0	0	2	276143	0	0	0	0	3	1230052	1	1554889	0	0	0	0	0	0	0	0	0	0	0	0	0	0	0	0	0	0	0	0
1:5297907-5298178	AT1G05163,	1	+	0	0	0	0	0	0	1	64081	0	0	0	0	2	261861	2	311903	0	0	0	0	1	50046	0	0	0	0	0	0	0	0	0	0	0	0	0	0
1:7144459-7144736	AT1G20620,	1	+	0	0	0	0	0	0	0	0	0	0	0	0	3	42900	3	52928	0	0	0	0	0	0	0	0	0	0	0	0	0	0	0	0	0	0	0	0
1:8271213-8271373	AT1G23310,	1	-	0	0	1	5003	0	0	1	4738	0	0	0	0	0	0	0	0	0	0	1	8873	0	0	3	17139	0	0	0	0	0	0	0	0	0	0	0	0
1:8594215-8594519	AT1G24260,	3	+	0	0	0	0	0	0	0	0	0	0	0	0	0	0	0	0	0	0	0	0	0	0	0	0	0	0	0	0	0	0	0	0	6	2619	0	0
1:9069033-9069523	AT1G26208,	2	-	0	0	0	0	0	0	0	0	0	0	0	0	0	0	2	112	0	0	0	0	0	0	0	0	0	0	0	0	0	0	0	0	2	27	2	27
2:11291531-11291676	AT2G26550,	1	-	0	0	0	0	1	156	0	0	0	0	1	154	0	0	0	0	0	0	1	102	0	0	0	0	1	114	0	0	1	77	1	161	0	0	0	0
2:11674495-11676549	n/a		-	0	0	0	0	0	0	0	0	0	0	0	0	0	0	6	129	0	0	0	0	0	0	0	0	0	0	0	0	0	0	0	0	0	0	0	0
2:12065000-12065284	AT2G28290,	2	+	0	0	0	0	0	0	0	0	1	294	0	0	0	0	2	625	0	0	0	0	0	0	0	0	0	0	0	0	1	94	0	0	0	0	2	324
2:12268037-12270076	AT2G28620,	8	-	0	0	1	213	0	0	0	0	2	301	2	568	1	339	0	0	0	0	0	0	0	0	0	0	0	0	0	0	0	0	0	0	0	0	0	0
2:13037382-13038219	AT2G30600,	1	+	0	0	1	599	1	692	0	0	0	0	0	0	0	0	0	0	0	0	0	0	0	0	4	294	0	0	0	0	0	0	0	0	0	0	0	0
2:13175716-13175864	AT2G30950,	1	+	0	0	0	0	2	2860	0	0	0	0	0	0	0	0	0	0	2	986	0	0	0	0	0	0	0	0	0	0	0	0	0	0	0	0	2	2016
2:13271979-13272117	AT2G31141,	1	-	0	0	0	0	0	0	0	0	0	0	0	0	0	0	0	0	0	0	0	0	0	0	0	0	0	0	0	0	0	0	0	0	0	0	6	245739
2:134091-134273	AT2G01250,	1	-	0	0	0	0	0	0	0	0	0	0	0	0	4	4378	0	0	0	0	0	0	0	0	0	0	0	0	0	0	0	0	0	0	1	4140	1	3386
2:13867526-13868386	AT2G32700,	4	+	0	0	0	0	1	394	0	0	0	0	1	1416	0	0	0	0	1	92	0	0	0	0	1	722	0	0	0	0	0	0	0	0	2	791	0	0
2:14525451-14525627	AT2G34430,	1	+	0	0	0	0	0	0	3	36399	0	0	0	0	0	0	0	0	1	19659	2	51603	0	0	0	0	0	0	0	0	0	0	0	0	0	0	0	0
2:14640631-14640771	AT2G34710,	1	-	0	0	0	0	0	0	0	0	3	664	0	0	1	971	0	0	0	0	0	0	0	0	0	0	0	0	2	30	0	0	0	0	0	0	0	0
2:15511157-15511363	AT2G36930,	1	-	0	0	0	0	0	0	0	0	0	0	0	0	0	0	4	1043	0	0	0	0	0	0	0	0	0	0	0	0	0	0	0	0	1	489	1	429
2:15832867-15833142	AT2G37760,	1	+	0	0	0	0	0	0	0	0	1	391	0	0	3	329	1	474	0	0	1	44	0	0	0	0	0	0	0	0	0	0	0	0	0	0	0	0
2:16513612-16514897	AT2G39580,	4	+	0	0	1	124	0	0	0	0	0	0	0	0	1	284	0	0	0	0	1	114	0	0	3	233	0	0	0	0	0	0	0	0	0	0	0	0
2:16599876-16600316	AT2G39800,	3	-	0	0	0	0	0	0	0	0	0	0	0	0	0	0	4	1042	0	0	0	0	0	0	0	0	0	0	0	0	0	0	0	0	2	3103	0	0
2:18668012-18668571	AT2G45270,	3	+	0	0	1	144	0	0	1	121	0	0	0	0	0	0	0	0	2	24	0	0	1	41	0	0	0	0	0	0	0	0	1	146	0	0	0	0
2:18927927-18928130	AT2G46020,	1	+	0	0	0	0	0	0	0	0	1	224	0	0	0	0	2	646	0	0	0	0	0	0	2	99	0	0	0	0	0	0	0	0	0	0	1	328
2:19005210-19007294	n/a		-	0	0	0	0	0	0	2	309	0	0	0	0	3	970	0	0	0	0	0	0	0	0	0	0	0	0	0	0	0	0	0	0	1	602	0	0
2:19621356-19621706	AT2G47940,	3	-	0	0	0	0	0	0	0	0	1	296	0	0	0	0	2	560	0	0	2	633	0	0	0	0	0	0	0	0	0	0	0	0	1	496	0	0
2:1993574-2015888	n/a		+	0	0	0	0	0	0	0	0	0	0	0	0	3	14094	3	18263	0	0	0	0	0	0	0	0	0	0	0	0	0	0	0	0	0	0	0	0
2:269324-269872	AT2G01600,	3	+	0	0	0	0	1	258	1	254	1	541	1	1142	0	0	0	0	0	0	0	0	0	0	0	0	0	0	0	0	0	0	2	553	0	0	0	0
2:4485096-4493960	n/a		+	0	0	1	18	0	0	1	27	0	0	0	0	0	0	3	140	0	0	0	0	0	0	0	0	0	0	0	0	0	0	1	27	0	0	0	0
2:6921311-6921501	AT2G15890,	1	-	0	0	0	0	0	0	0	0	0	0	0	0	0	0	0	0	0	0	0	0	3	9681	2	30646	1	6929	0	0	0	0	0	0	0	0	0	0
2:7534740-7542796	n/a		-	0	0	0	0	0	0	0	0	0	0	0	0	5	335	0	0	0	0	0	0	1	80	0	0	0	0	0	0	0	0	0	0	0	0	0	0
2:798383-798720	AT2G02800,	1	-	0	0	1	178	0	0	0	0	0	0	0	0	0	0	2	640	0	0	0	0	0	0	2	310	0	0	0	0	0	0	1	280	0	0	0	0
2:9216208-9216623	AT2G21520,	1	+	0	0	1	465	0	0	0	0	0	0	0	0	2	998	0	0	0	0	0	0	1	174	0	0	0	0	0	0	0	0	0	0	2	845	0	0
2:9775074-9798967	n/a		+	0	0	0	0	0	0	0	0	0	0	0	0	2	176	1	219	0	0	0	0	0	0	0	0	0	0	0	0	0	0	0	0	2	574	1	444
3:109182-109336	AT3G01320,	1	+	0	0	1	85	1	110	0	0	2	167	0	0	1	349	0	0	0	0	0	0	0	0	0	0	0	0	0	0	0	0	0	0	0	0	1	204
3:15819512-15820170	AT3G44050,	4	+	0	0	0	0	0	0	0	0	2	109	1	175	2	165	1	200	0	0	0	0	0	0	0	0	0	0	0	0	0	0	0	0	0	0	0	0
3:1622471-1622644	AT3G05590,	2	+	0	0	0	0	4	3180	0	0	0	0	0	0	0	0	2	7582	0	0	0	0	0	0	0	0	0	0	0	0	0	0	0	0	0	0	0	0
3:16930252-16930532	AT3G46100,	2	-	0	0	0	0	1	227	1	237	0	0	1	208	0	0	0	0	1	30	0	0	0	0	2	331	0	0	0	0	0	0	0	0	0	0	0	0
3:16977211-16977490	AT3G46210,	2	-	1	39	0	0	0	0	0	0	0	0	0	0	0	0	1	272	0	0	0	0	0	0	2	56	0	0	0	0	0	0	2	203	0	0	0	0
3:17168248-17169296	n/a		-	0	0	0	0	0	0	0	0	4	37	0	0	0	0	0	0	0	0	0	0	0	0	0	0	0	0	0	0	0	0	0	0	1	8	1	11
3:17171456-17174520	n/a		-	0	0	0	0	0	0	0	0	0	0	5	95	0	0	0	0	0	0	0	0	0	0	0	0	0	0	0	0	0	0	0	0	1	15	0	0
3:17305908-17306122	AT3G46970,	1	-	0	0	0	0	0	0	0	0	0	0	0	0	0	0	0	0	0	0	2	1562	0	0	4	3296	0	0	0	0	0	0	0	0	0	0	0	0
3:17711502-17711907	AT3G47980,	2	+	0	0	0	0	0	0	0	0	0	0	0	0	5	209	1	282	0	0	0	0	0	0	0	0	0	0	0	0	0	0	0	0	0	0	0	0
3:18141495-18141901	AT3G48930,	2	+	0	0	0	0	0	0	2	3136	0	0	0	0	0	0	4	6313	0	0	0	0	0	0	0	0	0	0	0	0	0	0	0	0	0	0	0	0
3:18326595-18328527	AT3G49410,	7	+	0	0	0	0	2	9	0	0	0	0	0	0	0	0	0	0	0	0	1	0	0	0	0	0	0	0	0	0	1	11	2	24	0	0	0	0
3:18369338-18370188	n/a		+	0	0	0	0	0	0	0	0	3	104	0	0	1	148	0	0	0	0	0	0	0	0	1	132	0	0	0	0	0	0	1	137	0	0	0	0
3:19089586-19091411	n/a		+	0	0	0	0	0	0	0	0	0	0	1	268	0	0	0	0	0	0	1	96	0	0	0	0	1	394	3	372	0	0	0	0	0	0	0	0
3:19155976-19160924	n/a		+	0	0	0	0	0	0	0	0	0	0	0	0	0	0	2	104	0	0	0	0	0	0	4	127	0	0	0	0	0	0	0	0	0	0	0	0
3:19187556-19188116	AT3G51730,	2	+	0	0	0	0	0	0	0	0	6	642	0	0	0	0	0	0	0	0	0	0	0	0	0	0	0	0	0	0	0	0	0	0	0	0	0	0
3:19217419-19217800	AT3G51820,	3	-	0	0	0	0	1	768	0	0	0	0	0	0	0	0	0	0	0	0	0	0	0	0	2	918	0	0	0	0	0	0	1	830	2	568	0	0
3:2172734-2173195	AT3G06880,	2	-	1	110	0	0	0	0	0	0	0	0	0	0	0	0	0	0	1	8	1	56	0	0	0	0	0	0	0	0	0	0	2	157	1	118	0	0
3:22153254-22153607	AT3G59970,	1	+	0	0	0	0	0	0	0	0	1	1560	0	0	0	0	2	2930	0	0	0	0	1	451	2	1362	0	0	0	0	0	0	0	0	0	0	0	0
3:2252625-2252932	AT3G07110,	2	+	0	0	0	0	2	1518	0	0	0	0	0	0	0	0	1	4165	0	0	0	0	0	0	0	0	0	0	0	0	1	1539	0	0	2	2849	0	0
3:23454398-23454845	AT3G63520,	2	+	0	0	0	0	1	785	0	0	0	0	0	0	2	628	0	0	0	0	0	0	0	0	2	2755	0	0	1	901	0	0	0	0	0	0	0	0
3:23454398-23455060	AT3G63520,	3	+	0	0	1	1164	1	794	0	0	0	0	0	0	0	0	0	0	0	0	0	0	0	0	0	0	0	0	1	1002	0	0	1	1139	2	1024	0	0
3:3776561-3777224	AT3G11930,	3	+	0	0	0	0	0	0	0	0	1	85	1	130	0	0	4	238	0	0	0	0	0	0	0	0	0	0	0	0	0	0	0	0	0	0	0	0
3:4302597-4309040	n/a		+	0	0	0	0	0	0	0	0	0	0	3	477	0	0	0	0	0	0	1	108	0	0	0	0	0	0	0	0	0	0	2	318	0	0	0	0
3:4856536-4857695	n/a		+	1	7	1	17	0	0	0	0	0	0	0	0	0	0	0	0	0	0	0	0	0	0	3	54	0	0	0	0	0	0	0	0	0	0	1	22
3:5399770-5400558	AT3G15950,	6	-	0	0	0	0	0	0	0	0	0	0	6	4922	0	0	0	0	0	0	0	0	0	0	0	0	0	0	0	0	0	0	0	0	0	0	0	0
3:5830283-5830437	AT3G03445,	1	-	0	0	0	0	3	106	0	0	0	0	0	0	3	340	0	0	0	0	0	0	0	0	0	0	0	0	0	0	0	0	0	0	0	0	0	0
3:7003071-7003743	AT3G20060,	4	-	0	0	0	0	2	500	0	0	0	0	1	875	0	0	0	0	0	0	1	403	0	0	0	0	0	0	0	0	0	0	2	731	0	0	0	0
3:8415974-8420595	n/a		+	0	0	0	0	0	0	0	0	0	0	0	0	3	46	3	45	0	0	0	0	0	0	0	0	0	0	0	0	0	0	0	0	0	0	0	0
3:9280105-9280484	AT3G25560,	1	-	0	0	0	0	0	0	0	0	2	2143	3	3229	0	0	0	0	0	0	0	0	0	0	0	0	0	0	0	0	0	0	1	269	0	0	0	0
3:9339807-9340311	AT3G25660,	3	-	0	0	1	1006	1	468	0	0	0	0	0	0	0	0	0	0	0	0	0	0	0	0	3	677	1	371	0	0	0	0	0	0	0	0	0	0
4:10660505-10660916	AT4G19550,	3	-	1	9	0	0	0	0	0	0	2	31	0	0	2	56	0	0	0	0	0	0	0	0	0	0	0	0	0	0	0	0	0	0	1	41	0	0
4:10725511-10725891	AT4G19710,	1	+	0	0	0	0	2	227	0	0	0	0	1	222	0	0	0	0	1	29	0	0	0	0	0	0	0	0	0	0	0	0	0	0	0	0	2	215
4:11165070-11165240	AT4G20850,	1	-	0	0	0	0	1	269	1	307	0	0	2	486	0	0	1	701	0	0	0	0	0	0	0	0	0	0	0	0	0	0	0	0	1	313	0	0
4:11183178-11183319	AT4G20890,	1	-	0	0	1	901	0	0	0	0	2	2104	3	3114	0	0	0	0	0	0	0	0	0	0	0	0	0	0	0	0	0	0	0	0	0	0	0	0
4:11390495-11390688	AT4G21380,	1	-	0	0	0	0	0	0	1	29	0	0	0	0	0	0	0	0	0	0	0	0	2	139	1	443	0	0	1	174	0	0	0	0	0	0	1	57
4:11562071-11562654	AT4G21760,	3	+	0	0	0	0	0	0	0	0	2	796	0	0	2	647	2	767	0	0	0	0	0	0	0	0	0	0	0	0	0	0	0	0	0	0	0	0
4:11998116-11998501	AT4G22860,	2	+	0	0	0	0	0	0	1	26	0	0	0	0	1	27	0	0	0	0	0	0	0	0	0	0	0	0	0	0	1	40	3	76	0	0	0	0
4:12104893-12106255	AT4G23100,	7	-	0	0	0	0	1	1095	2	1004	0	0	0	0	0	0	0	0	1	186	0	0	0	0	0	0	1	781	0	0	0	0	0	0	0	0	1	1019
4:12203719-12206956	n/a		-	0	0	0	0	0	0	0	0	0	0	0	0	0	0	0	0	0	0	0	0	0	0	0	0	0	0	0	0	0	0	0	0	3	15	3	3
4:1295655-1295794	AT4G02930,	1	-	0	0	0	0	3	306	0	0	0	0	0	0	0	0	3	1278	0	0	0	0	0	0	0	0	0	0	0	0	0	0	0	0	0	0	0	0
4:1441352-1441516	AT4G03280,	1	+	0	0	2	8713	0	0	1	7365	0	0	0	0	0	0	0	0	3	2079	0	0	0	0	0	0	0	0	0	0	0	0	0	0	0	0	0	0
4:15344713-15345007	AT4G31690,	1	-	0	0	0	0	1	0	0	0	0	0	0	0	0	0	0	0	0	0	0	0	0	0	0	0	0	0	0	0	0	0	2	4	1	4	2	6
4:15423084-15423554	AT4G31880,	2	-	1	85	0	0	0	0	1	220	1	207	0	0	1	436	1	488	0	0	0	0	1	40	0	0	0	0	0	0	0	0	0	0	0	0	0	0
4:16032191-16033227	AT4G33240,	3	-	0	0	0	0	0	0	1	135	0	0	0	0	1	272	2	329	1	28	0	0	0	0	0	0	1	82	0	0	0	0	0	0	0	0	0	0
4:16041470-16042782	AT4G33260,	3	-	0	0	0	0	0	0	1	101	0	0	0	0	0	0	1	422	0	0	0	0	0	0	0	0	0	0	0	0	3	73	0	0	0	0	1	122
4:16500819-16501369	AT4G34540,	2	+	0	0	0	0	1	47	0	0	1	138	0	0	0	0	0	0	0	0	0	0	0	0	0	0	0	0	1	55	0	0	0	0	2	147	1	153
4:17179851-17180198	AT4G36360,	2	-	0	0	0	0	0	0	0	0	0	0	0	0	3	1870	3	2156	0	0	0	0	0	0	0	0	0	0	0	0	0	0	0	0	0	0	0	0
4:17281897-17282678	AT4G36648,	2	-	0	0	0	0	0	0	1	368	0	0	0	0	5	5324	0	0	0	0	0	0	0	0	0	0	0	0	0	0	0	0	0	0	0	0	0	0
4:17832507-17832695	AT4G37930,	2	-	0	0	3	7534	0	0	1	7662	0	0	0	0	0	0	0	0	0	0	2	7523	0	0	0	0	0	0	0	0	0	0	0	0	0	0	0	0
4:18027239-18027385	AT4G38550,	1	+	0	0	0	0	0	0	0	0	0	0	0	0	2	236	0	0	1	189	0	0	0	0	3	3829	0	0	0	0	0	0	0	0	0	0	0	0
4:18415786-18416961	AT4G39680,	1	-	0	0	0	0	0	0	2	330	0	0	0	0	2	780	0	0	0	0	0	0	0	0	0	0	0	0	0	0	0	0	2	494	0	0	0	0
4:358453-358726	AT4G00850,	1	+	0	0	0	0	0	0	0	0	0	0	0	0	0	0	3	270	0	0	0	0	0	0	0	0	0	0	0	0	0	0	2	71	1	83	0	0
4:6525645-6527634	AT4G10570,	7	-	0	0	0	0	0	0	0	0	0	0	0	0	4	257	1	278	1	14	0	0	0	0	0	0	0	0	0	0	0	0	0	0	0	0	0	0
4:6663195-6664511	n/a		+	1	2	0	0	0	0	1	5	0	0	2	77	0	0	0	0	0	0	0	0	0	0	0	0	0	0	1	2	0	0	1	35	0	0	0	0
4:7109878-7110409	AT4G11820,	4	-	0	0	0	0	0	0	0	0	1	337	1	564	0	0	0	0	0	0	0	0	0	0	0	0	0	0	0	0	0	0	0	0	0	0	4	804
4:7350570-7352177	AT4G12420,	5	-	0	0	0	0	2	1884	0	0	0	0	2	5104	2	3226	0	0	0	0	0	0	0	0	0	0	0	0	0	0	0	0	0	0	0	0	0	0
4:7685550-7685745	AT4G13250,	1	-	0	0	1	886	0	0	0	0	0	0	0	0	0	0	0	0	0	0	2	847	0	0	0	0	0	0	0	0	0	0	1	1563	0	0	2	1511
4:8187800-8188263	AT4G14200,	2	-	0	0	0	0	1	63	0	0	0	0	1	536	2	294	2	371	0	0	0	0	0	0	0	0	0	0	0	0	0	0	0	0	0	0	0	0
4:8249657-8250276	AT4G14340,	4	-	0	0	0	0	0	0	0	0	0	0	2	468	2	417	0	0	0	0	0	0	0	0	1	203	0	0	0	0	1	127	0	0	0	0	0	0
4:9639334-9639719	AT4G17150,	2	+	0	0	0	0	0	0	0	0	2	210	0	0	0	0	0	0	2	30	0	0	0	0	0	0	0	0	0	0	0	0	1	176	1	106	0	0
4:975588-975942	AT4G02210,	1	-	1	32	0	0	0	0	0	0	0	0	2	151	0	0	0	0	0	0	0	0	1	33	2	70	0	0	0	0	0	0	0	0	0	0	0	0
5:1315088-1315489	AT5G04560,	3	+	0	0	2	100	0	0	0	0	0	0	0	0	0	0	0	0	0	0	0	0	0	0	4	169	0	0	0	0	0	0	0	0	0	0	0	0
5:14684300-14684996	AT5G37130,	4	+	0	0	0	0	0	0	0	0	2	128	0	0	0	0	1	275	0	0	0	0	0	0	0	0	0	0	0	0	0	0	0	0	1	145	2	148
5:14738507-14739298	AT5G37240,	4	-	0	0	0	0	0	0	0	0	1	33	0	0	1	38	0	0	0	0	0	0	0	0	0	0	0	0	0	0	0	0	3	38	1	8	0	0
5:14741423-14744184	n/a		-	0	0	0	0	0	0	0	0	0	0	4	56	0	0	0	0	0	0	0	0	0	0	0	0	0	0	0	0	0	0	0	0	2	34	0	0
5:15023284-15023873	AT5G37793,	1	+	0	0	0	0	0	0	0	0	0	0	1	99	1	81	0	0	0	0	0	0	0	0	0	0	0	0	3	1	0	0	1	31	0	0	0	0
5:15023284-15026752	n/a		+	0	0	1	18	1	23	0	0	2	62	1	102	0	0	0	0	0	0	0	0	0	0	0	0	0	0	0	0	1	17	0	0	0	0	0	0
5:15065605-15067645	AT5G37850,	6	+	0	0	0	0	1	286	0	0	2	323	0	0	0	0	0	0	0	0	0	0	0	0	0	0	0	0	0	0	1	196	1	353	1	276	0	0
5:16185564-16311048	n/a		-	0	0	0	0	0	0	0	0	0	0	0	0	6	823	0	0	0	0	0	0	0	0	0	0	0	0	0	0	0	0	0	0	0	0	0	0
5:16192242-16193040	AT5G40450,	2	-	0	0	0	0	0	0	0	0	0	0	3	2060	1	1781	1	2012	0	0	0	0	0	0	1	972	0	0	0	0	0	0	0	0	0	0	0	0
5:17558524-17558868	AT5G43720,	2	-	0	0	0	0	0	0	0	0	1	203	0	0	0	0	1	427	0	0	0	0	0	0	1	153	0	0	0	0	0	0	0	0	2	301	1	218
5:18169499-18169675	AT5G45020,	1	+	0	0	0	0	0	0	1	45	1	153	0	0	0	0	0	0	0	0	0	0	0	0	0	0	0	0	0	0	0	0	1	129	2	103	1	104
5:19097227-19098305	AT5G47040,	4	-	0	0	0	0	0	0	1	615	0	0	0	0	0	0	0	0	1	137	0	0	2	221	1	721	0	0	0	0	0	0	1	338	0	0	0	0
5:20637189-20637859	AT5G50740,	3	-	0	0	0	0	0	0	0	0	0	0	3	30	0	0	0	0	0	0	0	0	0	0	0	0	0	0	0	0	0	0	2	168	0	0	1	99
5:20754365-20755645	AT5G51050,	4	+	0	0	0	0	0	0	0	0	2	86	1	181	0	0	1	253	0	0	0	0	0	0	1	144	0	0	0	0	0	0	0	0	1	145	0	0
5:21240948-21241224	AT5G52310,	2	-	0	0	0	0	0	0	0	0	0	0	0	0	0	0	0	0	0	0	2	5265	0	0	3	12595	1	1294	0	0	0	0	0	0	0	0	0	0
5:22210796-22211105	AT5G54670,	2	+	0	0	0	0	0	0	0	0	0	0	4	924	1	476	0	0	0	0	1	17	0	0	0	0	0	0	0	0	0	0	0	0	0	0	0	0
5:22628372-22628549	n/a		+	0	0	0	0	0	0	0	0	0	0	0	0	1	341	5	427	0	0	0	0	0	0	0	0	0	0	0	0	0	0	0	0	0	0	0	0
5:22876040-22876296	AT5G56500,	2	+	0	0	0	0	0	0	1	100	0	0	0	0	5	807	0	0	0	0	0	0	0	0	0	0	0	0	0	0	0	0	0	0	0	0	0	0
5:25283681-25284489	AT5G63020,	1	+	1	20	0	0	0	0	0	0	0	0	0	0	2	35	3	35	0	0	0	0	0	0	0	0	0	0	0	0	0	0	0	0	0	0	0	0
5:25719542-25719864	AT5G64300,	1	+	0	0	0	0	0	0	0	0	1	323	0	0	0	0	2	623	0	0	0	0	0	0	0	0	2	246	0	0	0	0	1	488	0	0	0	0
5:26351957-26352096	AT5G65870,	1	+	0	0	0	0	0	0	0	0	0	0	0	0	1	398	0	0	0	0	0	0	0	0	0	0	0	0	0	0	0	0	0	0	4	1256	1	987
5:26518803-26519053	AT5G66400,	1	-	0	0	0	0	0	0	0	0	0	0	0	0	6	1609	0	0	0	0	0	0	0	0	0	0	0	0	0	0	0	0	0	0	0	0	0	0
5:26537665-26537931	n/a		-	0	0	0	0	0	0	0	0	0	0	0	0	0	0	6	128	0	0	0	0	0	0	0	0	0	0	0	0	0	0	0	0	0	0	0	0
5:2994697-2994862	AT5G09660,	1	-	0	0	0	0	1	4137	0	0	0	0	0	0	0	0	0	0	0	0	1	4353	0	0	0	0	1	5254	0	0	1	1136	0	0	0	0	2	1887
5:4219310-4219572	AT5G13220,	1	+	0	0	0	0	0	0	0	0	0	0	0	0	0	0	5	2471	0	0	0	0	0	0	0	0	0	0	0	0	0	0	0	0	0	0	1	377
5:4510115-4510468	AT5G13980,	2	+	0	0	0	0	0	0	0	0	0	0	1	1030	0	0	0	0	0	0	1	221	0	0	3	696	0	0	0	0	0	0	1	497	0	0	0	0
5:5212401-5212560	AT5G15970,	1	+	0	0	1	2614	0	0	0	0	0	0	0	0	2	3200	0	0	0	0	0	0	0	0	2	11744	0	0	1	2792	0	0	0	0	0	0	0	0
5:6683537-6688168	n/a		+	0	0	0	0	0	0	0	0	1	2640	0	0	0	0	0	0	0	0	1	802	0	0	0	0	0	0	0	0	0	0	3	2733	1	1858	0	0
5:794380-795164	AT5G03290,	3	+	0	0	0	0	0	0	0	0	0	0	0	0	1	1497	4	1980	0	0	0	0	0	0	0	0	0	0	0	0	0	0	1	896	0	0	0	0
5:8351693-8352240	AT5G24450,	2	+	1	53	0	0	0	0	0	0	0	0	0	0	1	386	1	414	0	0	0	0	0	0	0	0	1	97	0	0	0	0	0	0	2	237	0	0
5:8448213-8451081	AT5G24670,	10	+	0	0	0	0	0	0	0	0	1	205	3	277	0	0	0	0	0	0	0	0	0	0	0	0	0	0	0	0	1	153	0	0	1	160	0	0
5:8864703-8864900	AT5G25460,	2	+	0	0	0	0	0	0	6	1411	0	0	0	0	0	0	0	0	0	0	0	0	0	0	0	0	0	0	0	0	0	0	0	0	0	0	0	0
5:9201721-9227348	n/a		+	0	0	0	0	0	0	0	0	0	0	0	0	6	1249	0	0	0	0	0	0	0	0	0	0	0	0	0	0	0	0	0	0	0	0	0	0
5:9401033-9401660	AT5G26751,	3	-	0	0	0	0	0	0	0	0	0	0	2	1702	0	0	0	0	0	0	0	0	0	0	0	0	0	0	0	0	0	0	1	1156	2	779	1	724
5:9725460-9725892	AT5G27540,	2	+	0	0	0	0	0	0	1	220	0	0	2	685	0	0	1	778	0	0	0	0	0	0	0	0	0	0	0	0	0	0	0	0	1	453	1	427
Pt:1249-81481	n/a		+	0	0	0	0	0	0	0	0	0	0	0	0	0	0	0	0	0	0	0	0	0	0	0	0	0	0	0	0	0	0	0	0	5	1172934	1	771122
Pt:32716-85680	n/a		-	0	0	0	0	0	0	0	0	0	0	0	0	0	0	0	0	6	15743	0	0	0	0	0	0	0	0	0	0	0	0	0	0	0	0	0	0
Pt:51351-51609	ATCG00450,	0	-	0	0	0	0	6	187481	0	0	0	0	0	0	0	0	0	0	0	0	0	0	0	0	0	0	0	0	0	0	0	0	0	0	0	0	0	0
Pt:601-39609	n/a		-	0	0	0	0	0	0	0	0	0	0	0	0	0	0	0	0	0	0	6	1757504	0	0	0	0	0	0	0	0	0	0	0	0	0	0	0	0
Pt:63455-63673	n/a		-	0	0	0	0	6	104921	0	0	0	0	0	0	0	0	0	0	0	0	0	0	0	0	0	0	0	0	0	0	0	0	0	0	0	0	0	0
Pt:76060-76218	ATCG00720,	1	-	0	0	0	0	0	0	3	154638	0	0	0	0	0	0	0	0	0	0	0	0	0	0	0	0	3	96518	0	0	0	0	0	0	0	0	0	0
1:10484474-10485530	AT1G29940,	6	-	0	0	0	0	2	125	0	0	0	0	0	0	0	0	1	428	0	0	0	0	0	0	2	44	0	0	0	0	0	0	0	0	0	0	0	0
1:10783521-10783689	AT1G30470,	1	+	0	0	0	0	0	0	0	0	0	0	0	0	1	388	4	502	0	0	0	0	0	0	0	0	0	0	0	0	0	0	0	0	0	0	0	0
1:10812007-10812591	AT1G30520,	3	+	0	0	1	201	1	185	2	183	0	0	0	0	0	0	0	0	0	0	0	0	0	0	0	0	0	0	1	103	0	0	0	0	0	0	0	0
1:1126848-1127256	AT1G04230,	2	+	0	0	0	0	1	50	0	0	1	74	0	0	1	156	0	0	0	0	0	0	0	0	0	0	0	0	0	0	1	53	0	0	1	101	0	0
1:11459003-11459938	AT1G31910,	5	+	0	0	0	0	0	0	0	0	0	0	0	0	2	1522	1	1888	0	0	1	318	0	0	0	0	0	0	0	0	0	0	0	0	0	0	1	955
1:11581668-11583962	n/a		-	2	1	0	0	0	0	0	0	0	0	0	0	0	0	1	17	0	0	0	0	0	0	0	0	0	0	0	0	0	0	1	7	1	10	0	0
1:12195268-12384469	n/a		-	0	0	0	0	0	0	0	0	0	0	0	0	5	127	0	0	0	0	0	0	0	0	0	0	0	0	0	0	0	0	0	0	0	0	0	0
1:12381927-12382649	n/a		-	0	0	0	0	0	0	0	0	0	0	0	0	1	79	0	0	0	0	0	0	1	2	0	0	0	0	0	0	0	0	0	0	2	53	1	37
1:124248-124394	AT1G01320,	1	-	0	0	0	0	0	0	2	713	0	0	0	0	0	0	0	0	0	0	0	0	0	0	0	0	0	0	0	0	0	0	0	0	1	590	2	768
1:13641636-13641857	AT1G36280,	1	+	0	0	0	0	2	59	0	0	0	0	0	0	0	0	1	221	0	0	0	0	0	0	0	0	0	0	0	0	0	0	0	0	1	132	1	109
1:14160611-14160909	AT1G37130,	1	-	0	0	0	0	0	0	0	0	1	937	0	0	3	2524	0	0	0	0	1	1443	0	0	0	0	0	0	0	0	0	0	0	0	0	0	0	0
1:1488019-1488479	AT1G05160,	3	-	0	0	0	0	1	41	0	0	0	0	0	0	0	0	1	202	0	0	0	0	0	0	1	79	0	0	0	0	0	0	0	0	1	67	1	70
1:16268228-16268457	AT1G43170,	2	+	0	0	0	0	0	0	3	4298	0	0	0	0	0	0	0	0	0	0	0	0	0	0	0	0	0	0	0	0	0	0	0	0	2	7057	0	0
1:17179610-17180439	AT1G45474,	4	+	0	0	0	0	0	0	0	0	0	0	0	0	0	0	0	0	0	0	0	0	0	0	5	1210	0	0	0	0	0	0	0	0	0	0	0	0
1:17284119-17284593	AT1G47128,	2	-	0	0	0	0	0	0	0	0	0	0	1	3349	1	1956	1	2753	0	0	1	1439	0	0	0	0	0	0	1	570	0	0	0	0	0	0	0	0
1:17433291-17434335	AT1G47500,	3	+	0	0	0	0	0	0	1	117	1	94	0	0	0	0	0	0	0	0	0	0	0	0	0	0	1	86	1	62	0	0	0	0	1	149	0	0
1:1746210-1747440	AT1G05805,	5	+	0	0	0	0	0	0	0	0	3	304	0	0	0	0	0	0	0	0	0	0	0	0	0	0	0	0	0	0	0	0	1	252	1	146	0	0
1:17967859-17968138	AT1G48600,	2	+	0	0	0	0	0	0	0	0	3	2668	0	0	0	0	0	0	0	0	0	0	0	0	2	2987	0	0	0	0	0	0	0	0	0	0	0	0
1:18472715-18473592	AT1G49890,	4	+	0	0	0	0	0	0	0	0	0	0	1	168	0	0	1	161	0	0	0	0	0	0	0	0	0	0	0	0	0	0	0	0	1	180	2	171
1:18574406-18574758	AT1G50140,	2	-	0	0	0	0	0	0	0	0	0	0	2	332	0	0	1	337	0	0	0	0	0	0	1	259	0	0	0	0	0	0	0	0	1	225	0	0
1:18659425-18661765	AT1G50370,	9	+	0	0	0	0	1	261	0	0	0	0	0	0	0	0	1	713	0	0	0	0	0	0	0	0	0	0	0	0	0	0	0	0	1	466	2	405
1:18719775-18722118	n/a		+	0	0	0	0	0	0	0	0	0	0	0	0	1	38	2	52	0	0	0	0	0	0	2	10	0	0	0	0	0	0	0	0	0	0	0	0
1:1897562-1898422	AT1G06210,	2	+	0	0	0	0	0	0	0	0	1	440	2	904	0	0	0	0	0	0	0	0	0	0	2	384	0	0	0	0	0	0	0	0	0	0	0	0
1:19116497-19116858	AT1G51540,	2	+	0	0	0	0	0	0	2	88	0	0	1	363	1	292	0	0	0	0	0	0	0	0	0	0	0	0	0	0	0	0	0	0	1	143	0	0
1:1948123-1949141	AT1G06390,	5	+	0	0	0	0	0	0	0	0	0	0	1	742	0	0	1	887	0	0	1	224	0	0	0	0	0	0	0	0	0	0	0	0	1	668	1	587
1:19523310-19523787	AT1G52410,	4	+	0	0	0	0	0	0	0	0	0	0	0	0	0	0	0	0	0	0	0	0	0	0	0	0	0	0	0	0	0	0	5	838	0	0	0	0
1:20198162-20198402	AT1G54100,	2	-	0	0	0	0	0	0	0	0	0	0	1	1917	0	0	1	2158	0	0	3	585	0	0	0	0	0	0	0	0	0	0	0	0	0	0	0	0
1:20609537-20609697	AT1G55250,	1	+	0	0	0	0	0	0	1	63	2	108	0	0	0	0	0	0	0	0	1	68	0	0	0	0	0	0	0	0	0	0	0	0	1	106	0	0
1:20726904-20727486	AT1G55520,	4	-	0	0	1	125	0	0	0	0	0	0	0	0	1	404	0	0	0	0	0	0	0	0	1	237	2	75	0	0	0	0	0	0	0	0	0	0
1:2076827-2076979	AT1G06760,AT1G04503,	1	+	0	0	0	0	0	0	0	0	2	3006	3	4199	0	0	0	0	0	0	0	0	0	0	0	0	0	0	0	0	0	0	0	0	0	0	0	0
1:21327729-21328375	AT1G57590,	4	-	0	0	0	0	0	0	0	0	0	0	0	0	2	56	0	0	0	0	0	0	0	0	2	128	0	0	1	20	0	0	0	0	0	0	0	0
1:21385217-21385358	AT1G57750,	1	-	0	0	0	0	0	0	0	0	0	0	0	0	0	0	0	0	0	0	0	0	0	0	0	0	0	0	0	0	0	0	2	4894	3	5225	0	0
1:23038059-23038326	AT1G62310,	2	-	0	0	0	0	0	0	1	92	0	0	0	0	2	212	0	0	0	0	1	73	0	0	0	0	0	0	0	0	0	0	0	0	1	193	0	0
1:23231189-23231338	AT1G62740,	1	+	0	0	0	0	0	0	0	0	1	363	0	0	2	680	0	0	0	0	0	0	0	0	0	0	0	0	0	0	0	0	0	0	0	0	2	469
1:24036654-24036936	AT1G64680,	1	+	0	0	0	0	2	227	0	0	0	0	0	0	0	0	0	0	0	0	0	0	0	0	0	0	1	424	1	390	1	83	0	0	0	0	0	0
1:24301628-24303784	AT1G65430,	6	-	2	51	0	0	0	0	1	87	0	0	0	0	0	0	0	0	0	0	0	0	0	0	0	0	0	0	0	0	0	0	0	0	2	222	0	0
1:2508676-2510493	AT1G08060,	3	-	0	0	0	0	0	0	0	0	0	0	0	0	0	0	0	0	0	0	1	67	0	0	0	0	0	0	4	47	0	0	0	0	0	0	0	0
1:25499591-25499864	AT1G68020,	1	+	0	0	0	0	0	0	0	0	0	0	0	0	2	207	1	271	0	0	0	0	1	106	0	0	0	0	0	0	1	175	0	0	0	0	0	0
1:2574329-2574542	AT1G08200,	2	+	1	712	0	0	0	0	0	0	1	3614	2	7600	0	0	1	4711	0	0	0	0	0	0	0	0	0	0	0	0	0	0	0	0	0	0	0	0
1:2636648-2637252	AT1G08360,	2	+	0	0	0	0	1	2702	0	0	1	4140	0	0	0	0	0	0	0	0	0	0	2	367	0	0	0	0	0	0	0	0	1	5867	0	0	0	0
1:2655393-2655592	AT1G08420,	1	+	1	19	0	0	1	46	0	0	1	71	0	0	0	0	0	0	0	0	0	0	0	0	1	105	0	0	0	0	0	0	0	0	0	0	1	126
1:26674698-26675242	AT1G70740,	2	-	1	50	0	0	0	0	1	82	0	0	1	322	0	0	1	384	0	0	0	0	0	0	0	0	1	82	0	0	0	0	0	0	0	0	0	0
1:26862621-26863093	AT1G71260,	3	-	0	0	0	0	0	0	0	0	0	0	0	0	2	505	0	0	0	0	0	0	0	0	0	0	0	0	0	0	0	0	0	0	2	427	1	367
1:2697015-2698722	AT1G08520,	6	+	1	398	0	0	0	0	0	0	0	0	1	204	0	0	0	0	0	0	0	0	1	603	0	0	0	0	1	682	0	0	0	0	0	0	1	477
1:27430952-27432679	n/a		+	0	0	0	0	0	0	0	0	0	0	0	0	0	0	0	0	0	0	0	0	0	0	5	380	0	0	0	0	0	0	0	0	0	0	0	0
1:27847889-27850510	n/a		-	0	0	0	0	0	0	0	0	3	2118	1	3066	0	0	0	0	0	0	0	0	0	0	0	0	0	0	0	0	0	0	0	0	0	0	1	2146
1:28252587-28254291	n/a		+	0	0	0	0	0	0	0	0	0	0	0	0	0	0	5	2105	0	0	0	0	0	0	0	0	0	0	0	0	0	0	0	0	0	0	0	0
1:28252907-28256365	n/a		+	0	0	0	0	0	0	0	0	0	0	0	0	5	1649	0	0	0	0	0	0	0	0	0	0	0	0	0	0	0	0	0	0	0	0	0	0
1:28711690-28712510	AT1G76510,	3	-	0	0	0	0	0	0	0	0	0	0	0	0	0	0	2	327	0	0	1	38	0	0	1	80	1	43	0	0	0	0	0	0	0	0	0	0
1:28933339-28935187	AT1G76990,	6	+	0	0	1	381	0	0	0	0	0	0	0	0	3	1976	0	0	0	0	0	0	0	0	0	0	0	0	0	0	0	0	0	0	1	584	0	0
1:29661166-29661440	AT1G78900,	2	+	0	0	0	0	0	0	0	0	0	0	2	2960	0	0	1	4478	0	0	0	0	0	0	0	0	0	0	1	1394	0	0	0	0	1	3334	0	0
1:30055158-30056282	AT1G79910,	5	+	0	0	0	0	0	0	0	0	0	0	0	0	0	0	0	0	0	0	0	0	2	5	0	0	0	0	0	0	0	0	1	141	1	153	1	206
1:30263844-30264424	AT1G80490,	4	-	1	64	0	0	0	0	0	0	0	0	0	0	1	608	2	786	0	0	0	0	0	0	0	0	0	0	0	0	1	178	0	0	0	0	0	0
1:3632417-3632626	AT1G10900,	1	-	0	0	0	0	0	0	1	104	0	0	0	0	0	0	0	0	0	0	0	0	0	0	0	0	4	92	0	0	0	0	0	0	0	0	0	0
1:4489115-4489459	AT1G13170,	1	-	0	0	0	0	0	0	1	95	0	0	1	677	0	0	2	449	0	0	0	0	0	0	0	0	0	0	0	0	0	0	1	314	0	0	0	0
1:453594-455902	n/a		+	0	0	0	0	0	0	0	0	0	0	5	1979	0	0	0	0	0	0	0	0	0	0	0	0	0	0	0	0	0	0	0	0	0	0	0	0
1:5063252-5063555	AT1G14710,	2	-	0	0	0	0	0	0	0	0	1	272	0	0	2	670	2	804	0	0	0	0	0	0	0	0	0	0	0	0	0	0	0	0	0	0	0	0
1:596654-596802	AT1G02730,	1	-	0	0	0	0	0	0	0	0	1	789	1	1625	3	887	0	0	0	0	0	0	0	0	0	0	0	0	0	0	0	0	0	0	0	0	0	0
1:6967617-6968625	AT1G20090,	6	+	0	0	0	0	0	0	1	616	0	0	0	0	1	841	1	1026	0	0	0	0	0	0	0	0	0	0	1	281	0	0	1	949	0	0	0	0
1:7300407-7300611	AT1G20950,	2	-	0	0	0	0	0	0	0	0	0	0	0	0	0	0	5	929	0	0	0	0	0	0	0	0	0	0	0	0	0	0	0	0	0	0	0	0
1:9296053-9296223	AT1G26830,	1	+	0	0	0	0	1	284	0	0	0	0	0	0	0	0	0	0	0	0	0	0	0	0	1	530	0	0	0	0	0	0	1	479	1	500	1	450
1:949297-951211	AT1G03780,	9	-	0	0	1	125	1	101	0	0	0	0	0	0	0	0	0	0	0	0	0	0	0	0	0	0	2	5	0	0	0	0	0	0	1	169	0	0
1:949883-950125	AT1G03780,	1	-	0	0	0	0	0	0	0	0	2	190	0	0	0	0	0	0	0	0	0	0	0	0	0	0	0	0	0	0	0	0	0	0	0	0	3	169
1:949883-951211	AT1G03780,	6	-	1	86	0	0	0	0	0	0	0	0	0	0	0	0	1	371	0	0	0	0	0	0	0	0	0	0	1	8	0	0	0	0	2	182	0	0
1:9505718-9506203	AT1G27370,	2	-	0	0	0	0	2	40	0	0	0	0	0	0	0	0	0	0	0	0	0	0	0	0	0	0	0	0	0	0	0	0	0	0	0	0	3	495
1:9576162-9592507	n/a		+	0	0	0	0	0	0	0	0	0	0	0	0	1	204	2	221	0	0	0	0	0	0	2	54	0	0	0	0	0	0	0	0	0	0	0	0
2:10218640-10218883	AT2G24020,	2	-	0	0	2	1626	2	955	0	0	0	0	0	0	0	0	0	0	0	0	1	610	0	0	0	0	0	0	0	0	0	0	0	0	0	0	0	0
2:10335962-10336117	AT2G24280,	1	+	0	0	0	0	0	0	0	0	0	0	0	0	0	0	0	0	0	0	1	205	2	147	1	395	0	0	0	0	0	0	1	277	0	0	0	0
2:10418493-10418653	AT2G24520,	1	+	0	0	0	0	0	0	0	0	0	0	1	55	0	0	0	0	0	0	0	0	1	23	2	65	0	0	0	0	0	0	1	49	0	0	0	0
2:11035244-11036352	AT2G25880,	6	-	0	0	0	0	1	81	0	0	0	0	0	0	0	0	0	0	0	0	2	5	0	0	0	0	0	0	0	0	0	0	2	197	0	0	0	0
2:12250696-12251087	AT2G28590,	1	+	0	0	0	0	0	0	1	15	0	0	0	0	2	180	0	0	0	0	0	0	0	0	0	0	0	0	0	0	0	0	1	74	0	0	1	76
2:13828812-13828986	AT2G32580,	1	+	0	0	0	0	0	0	0	0	3	1006	0	0	0	0	0	0	0	0	0	0	0	0	0	0	0	0	0	0	0	0	2	1141	0	0	0	0
2:14352472-14356826	AT2G33980,	5	-	0	0	0	0	0	0	0	0	1	31	0	0	2	95	0	0	0	0	1	17	0	0	0	0	0	0	0	0	0	0	0	0	1	80	0	0
2:14462607-14462978	AT2G34250,	1	+	0	0	0	0	0	0	0	0	0	0	0	0	0	0	0	0	0	0	0	0	0	0	5	775	0	0	0	0	0	0	0	0	0	0	0	0
2:15000179-15000349	AT2G35690,	1	+	0	0	0	0	1	92	0	0	0	0	0	0	1	99	0	0	0	0	0	0	0	0	1	88	0	0	0	0	0	0	2	100	0	0	0	0
2:15120480-15120854	AT2G36010,	3	+	0	0	0	0	0	0	0	0	2	29	0	0	0	0	2	80	0	0	0	0	0	0	0	0	0	0	0	0	0	0	1	72	0	0	0	0
2:16186661-16186823	AT2G38710,	1	-	0	0	0	0	0	0	0	0	0	0	0	0	0	0	1	580	0	0	1	84	0	0	3	130	0	0	0	0	0	0	0	0	0	0	0	0
2:16231625-16231896	AT2G38840,	1	+	0	0	2	69	0	0	0	0	0	0	0	0	0	0	1	187	0	0	0	0	0	0	0	0	0	0	0	0	0	0	1	145	0	0	1	118
2:16571044-16571255	AT2G39730,	1	+	0	0	0	0	2	22999	0	0	0	0	0	0	0	0	0	0	0	0	0	0	0	0	0	0	0	0	0	0	0	0	0	0	3	11464	0	0
2:16571362-16571599	AT2G39730,	2	+	0	0	0	0	0	0	2	30356	0	0	0	0	0	0	0	0	0	0	3	24732	0	0	0	0	0	0	0	0	0	0	0	0	0	0	0	0
2:180649-181440	AT2G01420,	2	-	0	0	0	0	2	361	0	0	0	0	0	0	1	175	0	0	0	0	0	0	1	79	1	287	0	0	0	0	0	0	0	0	0	0	0	0
2:18185792-18190141	n/a		-	2	384	0	0	1	1205	0	0	1	335	1	449	0	0	0	0	0	0	0	0	0	0	0	0	0	0	0	0	0	0	0	0	0	0	0	0
2:19004200-19006341	n/a		-	0	0	0	0	0	0	0	0	0	0	5	642	0	0	0	0	0	0	0	0	0	0	0	0	0	0	0	0	0	0	0	0	0	0	0	0
2:19452927-19453157	AT2G47410,	2	+	0	0	0	0	1	111	0	0	0	0	1	239	0	0	0	0	0	0	0	0	0	0	3	220	0	0	0	0	0	0	0	0	0	0	0	0
2:236613-240001	n/a		+	0	0	0	0	0	0	0	0	0	0	0	0	5	9724	0	0	0	0	0	0	0	0	0	0	0	0	0	0	0	0	0	0	0	0	0	0
2:418299-418514	AT2G01910,	1	+	0	0	0	0	1	364	2	328	0	0	0	0	0	0	1	2070	0	0	0	0	0	0	0	0	1	153	0	0	0	0	0	0	0	0	0	0
2:5539963-5540935	AT2G13360,	2	-	0	0	0	0	0	0	0	0	0	0	0	0	1	74	0	0	0	0	0	0	0	0	4	12891	0	0	0	0	0	0	0	0	0	0	0	0
2:6041912-6043534	AT2G14260,	8	-	0	0	0	0	0	0	1	214	1	237	0	0	0	0	1	418	0	0	0	0	1	105	0	0	0	0	0	0	0	0	1	369	0	0	0	0
2:7556754-7556910	AT2G17390,	1	+	0	0	0	0	0	0	0	0	2	892	3	1975	0	0	0	0	0	0	0	0	0	0	0	0	0	0	0	0	0	0	0	0	0	0	0	0
2:7600495-7601397	n/a		+	0	0	0	0	0	0	0	0	1	0	0	0	0	0	0	0	0	0	0	0	0	0	0	0	0	0	0	0	1	1	1	9	2	13	0	0
2:7870734-7871003	AT2G18100,	2	+	0	0	0	0	0	0	0	0	0	0	1	58	0	0	2	97	0	0	0	0	0	0	0	0	0	0	0	0	1	17	0	0	1	38	0	0
2:805617-806484	AT2G02820,	4	-	0	0	0	0	0	0	0	0	0	0	0	0	0	0	1	228	0	0	0	0	0	0	4	115	0	0	0	0	0	0	0	0	0	0	0	0
2:8316282-8316535	AT2G19170,	2	-	0	0	0	0	0	0	0	0	0	0	0	0	0	0	0	0	0	0	0	0	0	0	4	62	0	0	0	0	0	0	0	0	1	246	0	0
2:8435740-8436038	AT2G19470,	2	-	0	0	0	0	0	0	0	0	0	0	1	411	0	0	0	0	0	0	2	157	0	0	0	0	0	0	0	0	1	156	0	0	1	284	0	0
2:8659532-8659834	AT2G20060,	2	+	0	0	1	255	0	0	0	0	0	0	0	0	0	0	0	0	0	0	1	58	0	0	0	0	0	0	0	0	0	0	0	0	3	479	0	0
2:8717171-8717329	AT2G20190,	1	-	0	0	0	0	0	0	0	0	0	0	2	691	0	0	0	0	0	0	2	165	0	0	0	0	0	0	0	0	0	0	1	423	0	0	0	0
2:8857017-8857575	AT2G20570,	3	-	0	0	0	0	0	0	0	0	0	0	0	0	0	0	0	0	0	0	0	0	0	0	5	2451	0	0	0	0	0	0	0	0	0	0	0	0
2:9019137-9028445	n/a		+	0	0	0	0	0	0	0	0	5	121	0	0	0	0	0	0	0	0	0	0	0	0	0	0	0	0	0	0	0	0	0	0	0	0	0	0
2:9240888-9241242	AT2G21590,	2	+	0	0	1	39	0	0	0	0	0	0	0	0	0	0	1	306	0	0	0	0	0	0	0	0	0	0	1	28	0	0	0	0	2	384	0	0
2:9266203-9270356	n/a		-	0	0	0	0	0	0	0	0	0	0	0	0	0	0	2	9612	0	0	0	0	1	2603	0	0	0	0	0	0	0	0	0	0	0	0	2	425
2:9775074-9786511	n/a		+	0	0	0	0	0	0	0	0	0	0	0	0	1	180	0	0	0	0	0	0	0	0	0	0	0	0	0	0	0	0	0	0	3	1005	1	922
2:9787644-9793372	n/a		+	0	0	0	0	0	0	1	873	0	0	0	0	0	0	0	0	1	138	0	0	1	752	0	0	0	0	0	0	0	0	2	539	0	0	0	0
3:1009483-1009824	AT3G03920,	2	-	0	0	0	0	0	0	0	0	0	0	0	0	1	328	2	351	0	0	0	0	0	0	1	55	1	51	0	0	0	0	0	0	0	0	0	0
3:10960604-10969080	n/a		-	0	0	0	0	0	0	0	0	0	0	1	4159	0	0	2	5552	0	0	0	0	0	0	0	0	0	0	1	1417	0	0	1	1021	0	0	0	0
3:11149766-11150617	AT3G29180,	3	+	0	0	0	0	0	0	0	0	0	0	5	838	0	0	0	0	0	0	0	0	0	0	0	0	0	0	0	0	0	0	0	0	0	0	0	0
3:1361531-1361888	AT3G04920,	1	+	0	0	0	0	0	0	0	0	0	0	0	0	0	0	5	6926	0	0	0	0	0	0	0	0	0	0	0	0	0	0	0	0	0	0	0	0
3:140717-141724	AT3G01370,	3	+	0	0	0	0	0	0	0	0	0	0	0	0	0	0	0	0	0	0	0	0	0	0	1	332	0	0	0	0	0	0	0	0	4	127	0	0
3:14202056-14202201	n/a		+	0	0	0	0	0	0	0	0	0	0	0	0	0	0	0	0	0	0	0	0	0	0	0	0	3	585	2	456	0	0	0	0	0	0	0	0
3:15181407-15181742	AT3G43190,	1	-	0	0	0	0	0	0	0	0	1	765	0	0	3	2428	1	3111	0	0	0	0	0	0	0	0	0	0	0	0	0	0	0	0	0	0	0	0
3:1549686-1553977	AT3G05400,	17	+	0	0	2	12	0	0	0	0	0	0	0	0	0	0	0	0	0	0	0	0	0	0	0	0	0	0	0	0	0	0	1	173	2	353	0	0
3:16309808-16311179	n/a		+	0	0	0	0	0	0	0	0	0	0	3	82	1	86	1	109	0	0	0	0	0	0	0	0	0	0	0	0	0	0	0	0	0	0	0	0
3:16311722-16314011	n/a		+	0	0	0	0	0	0	0	0	0	0	2	117	2	69	0	0	0	0	0	0	0	0	0	0	0	0	0	0	1	8	0	0	0	0	0	0
3:16311993-16314011	AT3G44765,	10	+	0	0	0	0	0	0	0	0	1	117	1	191	1	100	0	0	0	0	0	0	0	0	0	0	0	0	0	0	2	10	0	0	0	0	0	0
3:16914873-16915263	AT3G46040,	2	+	0	0	0	0	0	0	0	0	1	1326	0	0	1	1463	1	1924	0	0	0	0	0	0	0	0	0	0	0	0	0	0	1	2078	1	1584	0	0
3:17169794-17170622	AT3G46614,	5	-	0	0	1	6	0	0	0	0	2	54	0	0	0	0	0	0	0	0	0	0	0	0	0	0	0	0	0	0	0	0	1	11	1	12	0	0
3:17192051-17192516	AT3G46668,	3	+	0	0	0	0	2	20	0	0	0	0	0	0	0	0	3	93	0	0	0	0	0	0	0	0	0	0	0	0	0	0	0	0	0	0	0	0
3:17430-17648	AT3G01060,	1	-	0	0	0	0	1	381	0	0	0	0	0	0	0	0	0	0	0	0	0	0	0	0	2	292	1	266	0	0	0	0	0	0	0	0	1	395
3:17667337-17667696	AT3G47890,	2	-	0	0	1	52	1	48	0	0	0	0	0	0	0	0	0	0	0	0	0	0	0	0	0	0	1	36	0	0	0	0	0	0	1	93	1	127
3:18493471-18493983	AT3G49870,	2	-	0	0	0	0	0	0	0	0	0	0	3	1315	2	1229	0	0	0	0	0	0	0	0	0	0	0	0	0	0	0	0	0	0	0	0	0	0
3:19363755-19364575	AT3G52200,	4	+	0	0	0	0	0	0	0	0	2	478	0	0	1	715	2	924	0	0	0	0	0	0	0	0	0	0	0	0	0	0	0	0	0	0	0	0
3:19365106-19365915	AT3G52200,	5	+	0	0	0	0	0	0	0	0	3	365	0	0	0	0	0	0	0	0	0	0	0	0	0	0	0	0	0	0	1	167	0	0	0	0	1	304
3:1942682-1942903	AT3G06400,	1	+	0	0	0	0	1	231	0	0	0	0	1	609	2	787	0	0	0	0	0	0	1	89	0	0	0	0	0	0	0	0	0	0	0	0	0	0
3:19506512-19506677	AT3G52590,	2	+	0	0	0	0	0	0	1	4617	0	0	0	0	0	0	0	0	0	0	0	0	0	0	0	0	0	0	0	0	4	5828	0	0	0	0	0	0
3:20337657-20338005	AT3G54880,	2	-	0	0	0	0	0	0	0	0	0	0	3	1553	1	612	0	0	0	0	0	0	0	0	0	0	1	69	0	0	0	0	0	0	0	0	0	0
3:21625648-21625813	AT3G58460,	1	-	0	0	0	0	0	0	0	0	1	183	0	0	0	0	0	0	0	0	1	80	0	0	1	130	0	0	0	0	0	0	0	0	0	0	2	216
3:2172734-2172979	AT3G06880,	1	-	0	0	0	0	0	0	1	145	2	66	0	0	0	0	0	0	0	0	0	0	0	0	1	115	0	0	0	0	0	0	1	149	0	0	0	0
3:21811460-21811608	AT3G59020,	1	-	0	0	0	0	0	0	0	0	0	0	1	1171	0	0	0	0	0	0	1	224	0	0	0	0	1	202	0	0	0	0	1	914	0	0	1	442
3:22269368-22269561	AT3G60245,	2	+	0	0	0	0	0	0	1	3533	0	0	4	10101	0	0	0	0	0	0	0	0	0	0	0	0	0	0	0	0	0	0	0	0	0	0	0	0
3:22728135-22729216	AT3G61420,	5	-	0	0	0	0	2	85	0	0	0	0	2	455	0	0	0	0	0	0	1	101	0	0	0	0	0	0	0	0	0	0	0	0	0	0	0	0
3:23405523-23406369	n/a		+	0	0	0	0	0	0	0	0	0	0	0	0	0	0	0	0	0	0	1	29	0	0	2	41	0	0	2	33	0	0	0	0	0	0	0	0
3:3536432-3536935	AT3G11290,	1	-	0	0	1	60	0	0	0	0	3	125	0	0	1	203	0	0	0	0	0	0	0	0	0	0	0	0	0	0	0	0	0	0	0	0	0	0
3:4243147-4243378	AT3G13200,	0	+	0	0	0	0	0	0	0	0	1	29	0	0	1	31	0	0	0	0	0	0	0	0	0	0	0	0	0	0	0	0	2	27	1	29	0	0
3:4922583-4925236	n/a		+	1	147	0	0	0	0	0	0	0	0	0	0	0	0	0	0	0	0	0	0	0	0	1	942	1	448	0	0	0	0	1	234	0	0	1	297
3:4938106-4938353	AT3G14690,	1	+	0	0	0	0	0	0	2	271	0	0	1	263	1	139	0	0	0	0	1	293	0	0	0	0	0	0	0	0	0	0	0	0	0	0	0	0
3:5399469-5400258	AT3G15950,	6	-	0	0	0	0	0	0	0	0	0	0	5	6298	0	0	0	0	0	0	0	0	0	0	0	0	0	0	0	0	0	0	0	0	0	0	0	0
3:5557252-5557709	AT3G16370,	2	+	0	0	1	2752	1	5484	0	0	0	0	0	0	0	0	0	0	0	0	1	1207	0	0	0	0	0	0	0	0	0	0	1	2384	1	3173	0	0
3:5579530-5582569	n/a		+	0	0	0	0	0	0	0	0	0	0	0	0	4	1629	1	2137	0	0	0	0	0	0	0	0	0	0	0	0	0	0	0	0	0	0	0	0
3:5596970-5597431	AT3G16470,	1	-	0	0	0	0	0	0	0	0	0	0	5	6383	0	0	0	0	0	0	0	0	0	0	0	0	0	0	0	0	0	0	0	0	0	0	0	0
3:5969851-5972379	AT3G17440,	10	-	0	0	2	221	1	203	0	0	0	0	1	881	0	0	0	0	0	0	0	0	1	19	0	0	0	0	0	0	0	0	0	0	0	0	0	0
3:6467923-6468779	n/a		-	0	0	0	0	0	0	0	0	1	34	0	0	2	69	0	0	0	0	0	0	0	0	0	0	0	0	0	0	0	0	0	0	2	15	0	0
3:6485319-6485610	AT3G18820,	2	+	0	0	0	0	0	0	0	0	0	0	0	0	5	1688	0	0	0	0	0	0	0	0	0	0	0	0	0	0	0	0	0	0	0	0	0	0
3:6598298-6598470	AT3G19080,	1	+	0	0	0	0	1	18	0	0	2	54	0	0	0	0	0	0	0	0	0	0	0	0	0	0	2	7	0	0	0	0	0	0	0	0	0	0
3:6756018-6756498	AT3G19490,	0	-	0	0	0	0	0	0	0	0	0	0	0	0	0	0	1	49	0	0	0	0	0	0	0	0	0	0	0	0	0	0	0	0	1	28	3	28
3:8283680-8284017	AT3G23210,	2	-	1	26	0	0	0	0	0	0	0	0	0	0	0	0	2	170	0	0	0	0	0	0	0	0	0	0	0	0	0	0	2	140	0	0	0	0
3:8432708-8442075	n/a		+	0	0	0	0	0	0	0	0	0	0	2	39	0	0	0	0	0	0	0	0	0	0	0	0	1	62	0	0	0	0	1	186	0	0	1	183
3:8474520-8475079	AT3G23600,	3	+	0	0	0	0	0	0	1	758	0	0	0	0	0	0	3	2475	0	0	0	0	0	0	0	0	0	0	0	0	0	0	0	0	0	0	1	1829
3:8733642-8733820	AT3G24170,	2	-	0	0	0	0	0	0	0	0	1	300	0	0	2	494	0	0	0	0	0	0	0	0	0	0	0	0	0	0	0	0	0	0	1	1073	1	1126
3:9245580-9245954	n/a		+	0	0	1	27	0	0	1	40	0	0	0	0	0	0	0	0	0	0	0	0	0	0	0	0	0	0	0	0	1	28	1	59	1	81	0	0
3:9528127-9530244	n/a		+	0	0	0	0	1	395	1	351	0	0	0	0	0	0	0	0	0	0	0	0	0	0	0	0	0	0	0	0	0	0	0	0	3	670	0	0
3:9796049-9796188	AT3G26650,	1	-	0	0	0	0	1	13984	2	12722	0	0	0	0	0	0	0	0	1	3722	0	0	0	0	0	0	0	0	0	0	0	0	0	0	1	13134	0	0
4:10298006-10298272	AT4G18710,	2	+	0	0	0	0	0	0	0	0	1	1072	1	2202	1	1912	0	0	0	0	0	0	0	0	0	0	0	0	0	0	0	0	2	1049	0	0	0	0
4:11018520-11019211	AT4G20430,	2	-	0	0	0	0	0	0	0	0	4	289	0	0	0	0	0	0	0	0	0	0	0	0	0	0	0	0	0	0	0	0	0	0	1	116	0	0
4:11161337-11161613	AT4G20850,	2	-	0	0	0	0	0	0	0	0	0	0	5	1116	0	0	0	0	0	0	0	0	0	0	0	0	0	0	0	0	0	0	0	0	0	0	0	0
4:11717805-11718606	AT4G22120,	4	-	0	0	1	87	2	79	0	0	0	0	0	0	0	0	0	0	0	0	0	0	0	0	0	0	0	0	0	0	0	0	0	0	1	230	1	227
4:11717805-11719164	AT4G22120,	5	-	0	0	0	0	0	0	0	0	0	0	1	888	1	905	2	1158	0	0	0	0	0	0	0	0	0	0	0	0	0	0	0	0	1	258	0	0
4:11930109-11935313	n/a		-	0	0	0	0	0	0	1	363	0	0	0	0	0	0	0	0	2	241	0	0	0	0	0	0	0	0	0	0	0	0	2	296	0	0	0	0
4:12019282-12019621	AT4G22930,	2	+	0	0	0	0	0	0	2	181	0	0	1	443	0	0	0	0	0	0	0	0	0	0	0	0	0	0	0	0	1	162	1	348	0	0	0	0
4:12594837-12595540	AT4G24290,	2	+	0	0	0	0	1	242	0	0	0	0	0	0	1	886	2	1097	0	0	0	0	0	0	0	0	0	0	0	0	0	0	0	0	1	403	0	0
4:1286618-1286942	AT4G02900,	1	+	0	0	0	0	0	0	0	0	1	33	0	0	0	0	0	0	0	0	0	0	0	0	2	60	0	0	0	0	0	0	0	0	1	55	1	44
4:13750925-13751059	AT4G27520,	1	+	0	0	0	0	0	0	0	0	0	0	0	0	0	0	0	0	0	0	0	0	0	0	5	5495	0	0	0	0	0	0	0	0	0	0	0	0
4:14820314-14820496	AT4G30270,	1	+	0	0	0	0	0	0	0	0	0	0	0	0	0	0	1	328	0	0	0	0	0	0	0	0	0	0	3	236	0	0	1	1218	0	0	0	0
4:15266418-15271505	n/a		+	0	0	0	0	0	0	0	0	1	631	3	1428	0	0	0	0	0	0	0	0	0	0	0	0	0	0	1	195	0	0	0	0	0	0	0	0
4:15642114-15643477	AT4G32410,	5	-	0	0	0	0	0	0	0	0	0	0	2	3160	0	0	3	2962	0	0	0	0	0	0	0	0	0	0	0	0	0	0	0	0	0	0	0	0
4:15902641-15902985	AT4G32940,	2	-	0	0	1	317	1	557	1	471	0	0	0	0	0	0	0	0	0	0	0	0	0	0	1	2154	0	0	0	0	0	0	1	2069	0	0	0	0
4:16206388-16206807	AT4G33790,	2	-	0	0	0	0	0	0	0	0	0	0	0	0	0	0	0	0	0	0	0	0	0	0	0	0	0	0	0	0	0	0	2	2089	1	1722	2	1567
4:16535837-16536110	AT4G34620,	2	+	1	3887	0	0	0	0	2	5154	0	0	0	0	1	999	0	0	0	0	0	0	0	0	0	0	0	0	0	0	0	0	1	4957	0	0	0	0
4:16932185-16932497	AT4G35730,	2	+	0	0	0	0	0	0	0	0	0	0	0	0	0	0	0	0	0	0	0	0	0	0	0	0	3	23	2	14	0	0	0	0	0	0	0	0
4:17126143-17129192	n/a		+	0	0	0	0	1	152	0	0	0	0	0	0	0	0	3	673	0	0	0	0	0	0	0	0	0	0	0	0	0	0	0	0	1	374	0	0
4:17547101-17547942	AT4G37280,	4	-	0	0	2	215	1	167	0	0	0	0	0	0	0	0	0	0	0	0	0	0	0	0	0	0	0	0	0	0	1	243	0	0	1	356	0	0
4:18027239-18027708	AT4G38550,	2	+	0	0	0	0	0	0	0	0	0	0	1	235	0	0	0	0	0	0	0	0	1	1131	2	3409	1	515	0	0	0	0	0	0	0	0	0	0
4:2325871-2326127	AT4G04610,	1	+	0	0	0	0	0	0	0	0	0	0	0	0	0	0	5	3111	0	0	0	0	0	0	0	0	0	0	0	0	0	0	0	0	0	0	0	0
4:2588507-2588678	AT4G05050,	1	-	0	0	0	0	0	0	0	0	0	0	0	0	0	0	0	0	0	0	1	3707	0	0	0	0	0	0	0	0	0	0	0	0	4	14226	0	0
4:6665633-6666001	n/a		+	0	0	0	0	1	12	0	0	0	0	1	120	1	80	1	108	0	0	0	0	0	0	0	0	0	0	0	0	0	0	0	0	0	0	1	46
4:6921162-6921966	AT4G11380,	3	+	0	0	0	0	0	0	1	282	0	0	3	719	0	0	0	0	0	0	0	0	0	0	0	0	0	0	0	0	0	0	1	723	0	0	0	0
4:7455225-7455377	AT4G12610,	1	+	0	0	1	50	0	0	0	0	0	0	0	0	0	0	0	0	0	0	0	0	0	0	0	0	0	0	0	0	0	0	0	0	2	108	2	134
4:7741864-7742145	AT4G13290,	1	+	0	0	0	0	0	0	0	0	0	0	2	1462	1	598	2	763	0	0	0	0	0	0	0	0	0	0	0	0	0	0	0	0	0	0	0	0
4:8169645-8170551	AT4G14160,	4	+	0	0	0	0	1	359	1	371	1	455	1	740	0	0	0	0	0	0	0	0	0	0	0	0	0	0	1	130	0	0	0	0	0	0	0	0
4:8249657-8251167	AT4G14340,	8	-	0	0	0	0	1	97	0	0	0	0	0	0	2	383	1	402	0	0	0	0	0	0	0	0	0	0	1	47	0	0	0	0	0	0	0	0
4:8690711-8698962	n/a		+	0	0	0	0	3	39	0	0	0	0	0	0	0	0	2	23	0	0	0	0	0	0	0	0	0	0	0	0	0	0	0	0	0	0	0	0
4:9013977-9014253	AT4G15880,	2	+	0	0	0	0	0	0	0	0	0	0	2	326	0	0	0	0	0	0	0	0	0	0	0	0	0	0	0	0	0	0	0	0	2	294	1	219
4:9516075-9550380	n/a		-	0	0	0	0	0	0	1	15	0	0	0	0	0	0	1	61	0	0	0	0	0	0	0	0	1	8	0	0	0	0	0	0	2	27	0	0
4:9639330-9639719	AT4G17150,	2	+	0	0	0	0	0	0	0	0	0	0	0	0	0	0	0	0	0	0	0	0	0	0	0	0	0	0	1	76	1	108	2	176	1	106	0	0
4:9951550-9951906	AT4G17910,	3	-	0	0	1	49	0	0	0	0	0	0	2	123	0	0	0	0	0	0	0	0	0	0	0	0	0	0	0	0	0	0	2	106	0	0	0	0
5:10017340-10017932	AT5G27990,	3	+	0	0	1	205	0	0	0	0	0	0	3	623	0	0	1	702	0	0	0	0	0	0	0	0	0	0	0	0	0	0	0	0	0	0	0	0
5:13110849-13111249	AT5G34850,	1	-	0	0	0	0	0	0	3	542	1	742	0	0	1	676	0	0	0	0	0	0	0	0	0	0	0	0	0	0	0	0	0	0	0	0	0	0
5:13428504-13429723	AT5G35180,	4	+	1	75	0	0	1	211	0	0	0	0	1	632	2	408	0	0	0	0	0	0	0	0	0	0	0	0	0	0	0	0	0	0	0	0	0	0
5:13902652-13902799	AT5G35735,	1	+	0	0	0	0	0	0	0	0	0	0	1	2283	1	3445	3	4460	0	0	0	0	0	0	0	0	0	0	0	0	0	0	0	0	0	0	0	0
5:1499134-1500083	AT5G05080,	5	-	0	0	1	723	1	454	0	0	2	2240	0	0	1	1882	0	0	0	0	0	0	0	0	0	0	0	0	0	0	0	0	0	0	0	0	0	0
5:15008897-15009211	AT5G37790,	2	-	0	0	0	0	1	81	0	0	0	0	0	0	0	0	0	0	0	0	0	0	0	0	4	125	0	0	0	0	0	0	0	0	0	0	0	0
5:15025579-15026752	n/a		+	0	0	0	0	0	0	0	0	1	35	1	46	0	0	0	0	0	0	0	0	0	0	0	0	0	0	0	0	1	13	0	0	0	0	2	43
5:15025927-15026752	n/a		+	0	0	0	0	0	0	0	0	1	54	2	69	0	0	1	82	0	0	0	0	0	0	0	0	0	0	0	0	0	0	0	0	0	0	1	60
5:15381808-15384895	n/a		-	0	0	0	0	0	0	0	0	5	27	0	0	0	0	0	0	0	0	0	0	0	0	0	0	0	0	0	0	0	0	0	0	0	0	0	0
5:16186470-16186613	AT5G40450,	1	-	0	0	0	0	1	356	0	0	0	0	0	0	3	1797	0	0	0	0	0	0	0	0	0	0	0	0	0	0	0	0	1	562	0	0	0	0
5:16548236-16554832	n/a		+	0	0	0	0	0	0	0	0	0	0	0	0	0	0	1	398	0	0	0	0	0	0	3	111	0	0	0	0	0	0	1	151	0	0	0	0
5:17195653-17195832	AT5G42890,	2	-	0	0	0	0	0	0	2	298	0	0	0	0	0	0	0	0	0	0	0	0	0	0	0	0	0	0	0	0	0	0	1	1454	2	1527	0	0
5:17689669-17689858	AT5G43960,	2	-	0	0	1	366	0	0	0	0	0	0	0	0	0	0	0	0	0	0	0	0	0	0	0	0	1	140	0	0	0	0	1	653	1	237	1	277
5:17860459-17860684	AT5G44340,	2	-	0	0	1	2286	1	2527	0	0	0	0	0	0	0	0	2	5407	0	0	0	0	0	0	0	0	0	0	0	0	0	0	1	3788	0	0	0	0
5:17990613-17990911	AT5G44600,	2	+	0	0	0	0	0	0	1	69	0	0	0	0	0	0	1	28	0	0	2	33	0	0	0	0	0	0	0	0	0	0	0	0	1	87	0	0
5:18535538-18535842	AT5G45690,	2	-	0	0	0	0	2	1	3	4	0	0	0	0	0	0	0	0	0	0	0	0	0	0	0	0	0	0	0	0	0	0	0	0	0	0	0	0
5:19097680-19098305	AT5G47040,	3	-	0	0	0	0	2	568	0	0	0	0	0	0	0	0	2	664	0	0	0	0	0	0	0	0	0	0	1	187	0	0	0	0	0	0	0	0
5:19169961-19170141	AT5G47210,	2	-	0	0	0	0	1	1104	0	0	0	0	0	0	0	0	1	2181	0	0	0	0	0	0	0	0	0	0	0	0	0	0	0	0	1	1474	2	1631
5:19696234-19696447	AT5G48580,	2	-	0	0	0	0	0	0	0	0	0	0	5	2052	0	0	0	0	0	0	0	0	0	0	0	0	0	0	0	0	0	0	0	0	0	0	0	0
5:20202958-20207065	n/a		-	0	0	0	0	0	0	1	350	0	0	0	0	0	0	0	0	1	342	0	0	1	463	0	0	0	0	0	0	0	0	0	0	0	0	2	541
5:20220269-20220504	AT5G49760,	1	+	0	0	0	0	0	0	1	368	0	0	1	377	1	273	0	0	0	0	1	323	0	0	0	0	0	0	0	0	0	0	0	0	1	237	0	0
5:21811769-21945538	n/a		-	0	0	0	0	0	0	0	0	0	0	0	0	0	0	5	111417	0	0	0	0	0	0	0	0	0	0	0	0	0	0	0	0	0	0	0	0
5:22383929-22385578	n/a		-	0	0	0	0	0	0	1	413	0	0	0	0	0	0	4	1684	0	0	0	0	0	0	0	0	0	0	0	0	0	0	0	0	0	0	0	0
5:22785329-22785537	AT5G56280,	1	-	2	96	1	213	0	0	0	0	0	0	0	0	0	0	0	0	0	0	0	0	0	0	0	0	0	0	0	0	1	169	1	388	0	0	0	0
5:22925877-22926139	AT5G56630,	1	+	0	0	0	0	0	0	0	0	1	357	0	0	1	614	2	758	0	0	0	0	0	0	1	336	0	0	0	0	0	0	0	0	0	0	0	0
5:22990322-22990801	AT5G56860,	1	-	0	0	0	0	1	198	1	203	0	0	0	0	0	0	0	0	0	0	0	0	0	0	3	234	0	0	0	0	0	0	0	0	0	0	0	0
5:23621301-23621457	AT5G58430,	1	-	0	0	0	0	0	0	0	0	0	0	0	0	2	708	0	0	0	0	3	397	0	0	0	0	0	0	0	0	0	0	0	0	0	0	0	0
5:24228671-24228824	AT5G60170,	1	+	0	0	1	144	1	171	0	0	0	0	0	0	0	0	0	0	0	0	1	120	0	0	0	0	1	131	0	0	0	0	1	264	0	0	0	0
5:24870938-24871098	AT5G61940,	1	+	0	0	0	0	0	0	0	0	0	0	0	0	0	0	0	0	0	0	0	0	0	0	0	0	0	0	0	0	0	0	1	20	2	24	2	31
5:24966362-24967882	AT5G62165,	3	+	0	0	0	0	0	0	0	0	0	0	0	0	1	737	2	963	0	0	0	0	0	0	0	0	0	0	0	0	0	0	2	509	0	0	0	0
5:25696331-25696661	AT5G64240,	1	+	0	0	0	0	0	0	0	0	0	0	0	0	0	0	0	0	0	0	0	0	0	0	5	1768	0	0	0	0	0	0	0	0	0	0	0	0
5:25917691-25917896	AT5G64840,	2	-	0	0	0	0	2	717	0	0	0	0	0	0	0	0	1	216	0	0	0	0	0	0	0	0	0	0	0	0	0	0	0	0	0	0	2	654
5:26255439-26255580	AT5G65670,	1	+	0	0	0	0	0	0	0	0	1	6058	2	12539	0	0	0	0	0	0	0	0	0	0	0	0	0	0	0	0	0	0	1	5178	1	3560	0	0
5:26956300-26956855	AT5G67580,	3	-	0	0	0	0	0	0	1	66	0	0	2	146	0	0	0	0	0	0	0	0	2	43	0	0	0	0	0	0	0	0	0	0	0	0	0	0
5:2715610-2715843	AT5G08420,	2	+	0	0	0	0	0	0	0	0	0	0	4	1276	0	0	0	0	0	0	1	330	0	0	0	0	0	0	0	0	0	0	0	0	0	0	0	0
5:2759521-2759893	AT5G08530,	2	-	0	0	0	0	0	0	0	0	3	1215	0	0	0	0	0	0	0	0	0	0	0	0	0	0	0	0	0	0	0	0	0	0	0	0	2	1137
5:2822860-2826590	n/a		+	0	0	0	0	0	0	0	0	0	0	1	1917	0	0	0	0	0	0	0	0	1	369	2	1034	1	739	0	0	0	0	0	0	0	0	0	0
5:290232-290462	AT5G01750,	2	+	0	0	3	2063	0	0	0	0	0	0	0	0	0	0	0	0	0	0	2	5164	0	0	0	0	0	0	0	0	0	0	0	0	0	0	0	0
5:290443-290670	AT5G01750,	1	+	0	0	0	0	0	0	0	0	0	0	0	0	1	2628	0	0	0	0	0	0	1	5199	0	0	0	0	0	0	1	948	1	1571	1	844	0	0
5:3632733-3633022	AT5G11380,	1	+	0	0	2	54	1	92	0	0	0	0	0	0	0	0	0	0	0	0	0	0	0	0	0	0	0	0	1	44	0	0	0	0	0	0	1	124
5:3953819-3955343	AT5G12230,	5	-	0	0	0	0	0	0	0	0	0	0	1	651	0	0	0	0	0	0	0	0	0	0	0	0	0	0	0	0	2	155	0	0	1	249	1	194
5:4094922-4099702	n/a		+	0	0	0	0	0	0	0	0	0	0	0	0	0	0	0	0	2	97	3	295	0	0	0	0	0	0	0	0	0	0	0	0	0	0	0	0
5:4328196-4329108	AT5G13480,	4	-	1	25	0	0	2	61	0	0	0	0	0	0	0	0	1	215	0	0	0	0	0	0	0	0	1	33	0	0	0	0	0	0	0	0	0	0
5:4750286-4750547	AT5G14720,	2	-	0	0	0	0	0	0	0	0	0	0	0	0	0	0	0	0	0	0	0	0	0	0	5	736	0	0	0	0	0	0	0	0	0	0	0	0
5:4761738-4762066	AT5G14740,	2	+	0	0	0	0	1	7782	1	7007	0	0	0	0	0	0	0	0	0	0	0	0	1	3909	0	0	0	0	1	5620	0	0	1	1970	0	0	0	0
5:5173191-5175995	AT5G15845,	5	+	0	0	0	0	0	0	0	0	1	13	0	0	1	16	1	17	0	0	1	1	0	0	0	0	0	0	0	0	0	0	0	0	0	0	1	11
5:6697776-6698423	AT5G19820,	4	-	0	0	1	600	0	0	0	0	0	0	1	1125	1	830	0	0	0	0	0	0	0	0	1	614	0	0	1	217	0	0	0	0	0	0	0	0
5:6699047-6699579	AT5G19820,	3	-	0	0	1	412	0	0	0	0	0	0	1	625	0	0	0	0	0	0	2	177	0	0	0	0	0	0	0	0	0	0	1	657	0	0	0	0
5:6762946-6763611	AT5G20020,	3	+	0	0	0	0	2	718	0	0	0	0	0	0	0	0	0	0	0	0	0	0	0	0	0	0	0	0	0	0	0	0	1	1899	2	1439	0	0
5:684842-685134	AT5G02940,	2	-	0	0	0	0	0	0	0	0	0	0	0	0	0	0	0	0	0	0	2	601	0	0	0	0	0	0	0	0	0	0	1	633	1	331	1	304
5:715301-715988	AT5G03050,	4	-	0	0	0	0	0	0	0	0	0	0	1	256	1	280	1	316	0	0	0	0	0	0	0	0	0	0	0	0	0	0	0	0	1	262	1	182
5:7302443-7302832	AT5G22050,	3	+	0	0	0	0	1	245	0	0	1	445	0	0	0	0	0	0	0	0	0	0	0	0	0	0	0	0	0	0	0	0	1	431	2	366	0	0
5:794380-794961	AT5G03290,	2	+	0	0	0	0	0	0	0	0	0	0	0	0	1	1381	1	1811	0	0	0	0	0	0	0	0	0	0	0	0	0	0	0	0	0	0	3	717
5:8500845-8501051	AT5G24770,	1	-	0	0	0	0	0	0	0	0	0	0	0	0	0	0	2	4160	0	0	0	0	0	0	0	0	0	0	0	0	0	0	0	0	3	7983	0	0
5:9073048-9073322	AT5G25980,	2	+	0	0	0	0	0	0	0	0	0	0	0	0	0	0	0	0	0	0	0	0	0	0	0	0	0	0	0	0	0	0	0	0	5	12892	0	0
5:9502551-9502754	AT5G27000,	1	+	0	0	0	0	0	0	0	0	0	0	0	0	1	51	0	0	0	0	0	0	0	0	0	0	0	0	0	0	0	0	1	115	1	75	2	81
5:9985890-9986054	AT5G27950,	1	+	0	0	0	0	0	0	0	0	1	439	0	0	1	732	2	880	0	0	0	0	0	0	0	0	0	0	0	0	0	0	1	378	0	0	0	0
Mt:42128-42301	ATMG00160,	1	-	0	0	0	0	0	0	0	0	0	0	0	0	0	0	0	0	0	0	0	0	0	0	0	0	1	5543	0	0	3	13358	0	0	1	30019	0	0
Pt:39668-39938	ATCG00350,	1	+	0	0	0	0	5	113383	0	0	0	0	0	0	0	0	0	0	0	0	0	0	0	0	0	0	0	0	0	0	0	0	0	0	0	0	0	0
Pt:39983-40122	ATCG00350,	1	-	0	0	0	0	5	100705	0	0	0	0	0	0	0	0	0	0	0	0	0	0	0	0	0	0	0	0	0	0	0	0	0	0	0	0	0	0
Pt:54952-144352	n/a		+	5	471583	0	0	0	0	0	0	0	0	0	0	0	0	0	0	0	0	0	0	0	0	0	0	0	0	0	0	0	0	0	0	0	0	0	0
Pt:55106-55275	ATCG00490,	1	-	0	0	0	0	0	0	4	1358738	0	0	0	0	0	0	0	0	0	0	1	940842	0	0	0	0	0	0	0	0	0	0	0	0	0	0	0	0
Pt:56096-56236	ATCG00490,	1	+	0	0	0	0	0	0	2	1721340	0	0	0	0	0	0	0	0	0	0	0	0	0	0	0	0	0	0	0	0	0	0	0	0	2	743014	1	615924
Pt:580-843	ATCG00020,	1	-	0	0	1	2609054	1	8578579	3	7589012	0	0	0	0	0	0	0	0	0	0	0	0	0	0	0	0	0	0	0	0	0	0	0	0	0	0	0	0
Pt:73716-73948	n/a		+	0	0	0	0	0	0	0	0	0	0	0	0	0	0	0	0	0	0	0	0	0	0	1	352512	0	0	0	0	2	43552	0	0	2	62956	0	0
Pt:7599-135333	n/a		-	0	0	0	0	5	89770	0	0	0	0	0	0	0	0	0	0	0	0	0	0	0	0	0	0	0	0	0	0	0	0	0	0	0	0	0	0
Pt:76936-77090	ATCG00730,	0	+	0	0	0	0	2	50201	0	0	0	0	0	0	0	0	0	0	0	0	0	0	0	0	0	0	0	0	0	0	0	0	1	19492	0	0	2	18949
Pt:997-1248	ATCG00020,	1	+	5	1511505	0	0	0	0	0	0	0	0	0	0	0	0	0	0	0	0	0	0	0	0	0	0	0	0	0	0	0	0	0	0	0	0	0	0
Pt:997-1387	ATCG00020,	1	+	2	1821288	0	0	0	0	3	6881589	0	0	0	0	0	0	0	0	0	0	0	0	0	0	0	0	0	0	0	0	0	0	0	0	0	0	0	0
1:10029674-10029943	AT1G28520,	1	+	0	0	0	0	0	0	0	0	0	0	0	0	0	0	3	481	0	0	0	0	0	0	0	0	0	0	0	0	0	0	1	309	0	0	0	0
1:10291015-10291303	AT1G29400,	2	-	0	0	0	0	0	0	0	0	0	0	0	0	4	1393	0	0	0	0	0	0	0	0	0	0	0	0	0	0	0	0	0	0	0	0	0	0
1:10472936-10475753	n/a		-	0	0	0	0	4	71291	0	0	0	0	0	0	0	0	0	0	0	0	0	0	0	0	0	0	0	0	0	0	0	0	0	0	0	0	0	0
1:10475084-10478799	n/a		-	1	71623	0	0	0	0	0	0	0	0	0	0	0	0	0	0	0	0	0	0	0	0	0	0	0	0	0	0	0	0	3	55018	0	0	0	0
1:10478210-10478381	AT1G29930,	1	+	0	0	0	0	3	166479	1	151200	0	0	0	0	0	0	0	0	0	0	0	0	0	0	0	0	0	0	0	0	0	0	0	0	0	0	0	0
1:10796547-10797285	AT1G30490,	3	-	0	0	0	0	0	0	0	0	1	500	0	0	1	977	0	0	0	0	0	0	0	0	0	0	0	0	0	0	0	0	1	353	0	0	1	223
1:11077478-11078000	AT1G31050,	1	-	0	0	0	0	0	0	0	0	1	417	0	0	2	280	1	385	0	0	0	0	0	0	0	0	0	0	0	0	0	0	0	0	0	0	0	0
1:11143690-11144015	AT1G31180,	2	-	0	0	0	0	0	0	0	0	1	191	0	0	1	412	0	0	0	0	0	0	0	0	0	0	0	0	0	0	0	0	0	0	2	555	0	0
1:1145295-1145720	AT1G04280,	2	-	0	0	0	0	2	348	0	0	1	715	0	0	0	0	1	1012	0	0	0	0	0	0	0	0	0	0	0	0	0	0	0	0	0	0	0	0
1:11533460-11533669	AT1G32060,	2	+	0	0	0	0	0	0	0	0	0	0	0	0	0	0	0	0	0	0	0	0	0	0	0	0	0	0	0	0	3	1558	1	2547	0	0	0	0
1:11614372-11614509	AT1G32230,	1	+	0	0	0	0	2	609	0	0	0	0	0	0	0	0	0	0	0	0	0	0	0	0	0	0	0	0	0	0	0	0	2	1469	0	0	0	0
1:11626726-11628041	AT1G32240,	3	-	0	0	0	0	0	0	0	0	0	0	0	0	3	182	0	0	0	0	0	0	0	0	0	0	0	0	0	0	0	0	1	91	0	0	0	0
1:12023909-12024487	AT1G33140,	2	+	0	0	0	0	0	0	0	0	0	0	0	0	0	0	1	11864	0	0	0	0	0	0	0	0	0	0	0	0	0	0	0	0	3	5835	0	0
1:12145687-12145942	AT1G33470,	1	+	0	0	0	0	0	0	0	0	1	937	1	1477	1	1682	1	2197	0	0	0	0	0	0	0	0	0	0	0	0	0	0	0	0	0	0	0	0
1:12598738-12600110	AT1G34460,	5	+	0	0	0	0	1	13	0	0	0	0	0	0	1	57	1	115	0	0	0	0	0	0	0	0	0	0	0	0	0	0	1	47	0	0	0	0
1:13540140-13540377	AT1G36160,	1	+	0	0	0	0	0	0	0	0	0	0	0	0	0	0	1	471	0	0	0	0	0	0	2	242	0	0	0	0	0	0	1	605	0	0	0	0
1:13899365-13899517	AT1G36730,	1	-	0	0	0	0	0	0	0	0	0	0	0	0	0	0	0	0	0	0	0	0	0	0	0	0	0	0	0	0	0	0	4	1250	0	0	0	0
1:14160516-14160909	AT1G37130,	1	-	0	0	0	0	0	0	2	1545	0	0	1	1022	0	0	1	2840	0	0	0	0	0	0	0	0	0	0	0	0	0	0	0	0	0	0	0	0
1:16797519-16797830	AT1G44170,	2	-	0	0	0	0	0	0	0	0	0	0	0	0	2	726	0	0	0	0	0	0	0	0	2	261	0	0	0	0	0	0	0	0	0	0	0	0
1:16872044-16872355	AT1G44575,	2	+	0	0	1	10960	0	0	0	0	0	0	0	0	0	0	0	0	0	0	1	5249	0	0	0	0	0	0	0	0	0	0	1	10718	0	0	1	9113
1:16912610-16913095	AT1G44790,	4	-	0	0	0	0	0	0	0	0	0	0	0	0	0	0	0	0	0	0	0	0	1	143	2	402	0	0	0	0	0	0	0	0	0	0	1	229
1:17458136-17458457	AT1G47550,	2	+	0	0	0	0	0	0	0	0	0	0	1	376	0	0	1	497	0	0	0	0	0	0	0	0	1	85	0	0	0	0	0	0	1	336	0	0
1:18098905-18099075	AT1G48920,	1	+	1	606	0	0	0	0	0	0	0	0	0	0	0	0	2	2882	0	0	0	0	0	0	0	0	1	576	0	0	0	0	0	0	0	0	0	0
1:1814447-1815242	AT1G05960,	4	-	0	0	0	0	0	0	0	0	4	271	0	0	0	0	0	0	0	0	0	0	0	0	0	0	0	0	0	0	0	0	0	0	0	0	0	0
1:18352549-18352725	AT1G49580,	2	+	0	0	0	0	0	0	0	0	2	164	0	0	0	0	0	0	0	0	0	0	0	0	0	0	0	0	0	0	0	0	2	251	0	0	0	0
1:18408373-18409198	AT1G49740,	3	+	0	0	0	0	0	0	1	79	0	0	0	0	0	0	2	447	0	0	0	0	0	0	0	0	1	54	0	0	0	0	0	0	0	0	0	0
1:1893429-1893626	AT1G06190,	1	-	0	0	2	850	0	0	0	0	0	0	0	0	0	0	0	0	1	71	0	0	0	0	0	0	0	0	0	0	0	0	1	540	0	0	0	0
1:19116497-19116667	AT1G51540,	1	+	0	0	0	0	0	0	0	0	0	0	1	314	1	254	0	0	0	0	0	0	0	0	1	75	1	55	0	0	0	0	0	0	0	0	0	0
1:19412117-19412428	AT1G52150,	2	-	0	0	0	0	0	0	0	0	2	538	1	841	1	954	0	0	0	0	0	0	0	0	0	0	0	0	0	0	0	0	0	0	0	0	0	0
1:19520929-19521714	AT1G52410,	5	+	0	0	0	0	0	0	0	0	0	0	0	0	0	0	1	1218	0	0	0	0	0	0	0	0	0	0	0	0	0	0	0	0	0	0	3	965
1:20063517-20063833	AT1G53730,	1	+	0	0	0	0	0	0	0	0	0	0	0	0	1	469	0	0	0	0	0	0	0	0	3	171	0	0	0	0	0	0	0	0	0	0	0	0
1:20290789-20291230	AT1G54360,	2	+	0	0	0	0	0	0	0	0	0	0	0	0	0	0	1	490	0	0	1	65	0	0	0	0	0	0	0	0	0	0	0	0	1	181	1	215
1:20294466-20296555	AT1G54370,	12	-	0	0	0	0	2	135	0	0	0	0	1	322	0	0	0	0	0	0	0	0	0	0	1	132	0	0	0	0	0	0	0	0	0	0	0	0
1:20310304-20310552	AT1G54410,	1	-	0	0	0	0	0	0	1	4635	0	0	2	119253	0	0	1	44115	0	0	0	0	0	0	0	0	0	0	0	0	0	0	0	0	0	0	0	0
1:20326798-20326956	AT1G54440,	1	+	0	0	0	0	0	0	0	0	0	0	0	0	0	0	0	0	0	0	0	0	0	0	4	154	0	0	0	0	0	0	0	0	0	0	0	0
1:20406003-20406145	AT1G54650,	1	-	0	0	0	0	0	0	0	0	0	0	3	162	0	0	0	0	0	0	0	0	0	0	0	0	0	0	1	28	0	0	0	0	0	0	0	0
1:20598439-20598648	AT1G55210,	1	+	0	0	0	0	0	0	0	0	0	0	1	2102	0	0	0	0	0	0	0	0	0	0	0	0	0	0	0	0	2	638	0	0	1	1493	0	0
1:20863028-20863419	AT1G55810,	3	+	0	0	0	0	0	0	0	0	1	243	1	414	0	0	1	443	0	0	0	0	0	0	1	115	0	0	0	0	0	0	0	0	0	0	0	0
1:20928728-20929396	AT1G55960,	3	-	0	0	0	0	1	201	0	0	0	0	0	0	0	0	1	205	0	0	0	0	0	0	2	186	0	0	0	0	0	0	0	0	0	0	0	0
1:20984781-20984923	AT1G56110,	2	-	0	0	0	0	0	0	0	0	0	0	4	1532	0	0	0	0	0	0	0	0	0	0	0	0	0	0	0	0	0	0	0	0	0	0	0	0
1:21165731-21166281	AT1G56500,	3	+	0	0	0	0	0	0	0	0	0	0	0	0	0	0	1	61	0	0	1	230	0	0	0	0	2	323	0	0	0	0	0	0	0	0	0	0
1:2132018-2133805	AT1G06950,	6	-	0	0	0	0	1	721	0	0	0	0	0	0	0	0	0	0	0	0	0	0	1	109	0	0	0	0	0	0	0	0	2	726	0	0	0	0
1:2186103-2186573	AT1G07119,	1	+	0	0	0	0	0	0	0	0	0	0	0	0	0	0	1	72	0	0	0	0	1	7	2	34	0	0	0	0	0	0	0	0	0	0	0	0
1:22027332-22028251	AT1G59840,	5	+	0	0	0	0	2	122	0	0	0	0	0	0	0	0	0	0	0	0	0	0	0	0	0	0	0	0	0	0	0	0	0	0	2	137	0	0
1:22315622-22315852	AT1G60590,	1	-	0	0	0	0	0	0	0	0	0	0	1	388	0	0	1	1427	0	0	0	0	0	0	0	0	1	15	0	0	0	0	0	0	1	236	0	0
1:22337701-22338233	AT1G60640,	4	-	0	0	0	0	0	0	0	0	0	0	2	708	0	0	0	0	0	0	0	0	0	0	0	0	0	0	0	0	0	0	0	0	2	169	0	0
1:22338174-22338384	AT1G60640,	2	-	0	0	0	0	0	0	0	0	0	0	0	0	1	345	0	0	0	0	0	0	0	0	3	172	0	0	0	0	0	0	0	0	0	0	0	0
1:22348412-22355608	n/a		-	0	0	0	0	0	0	0	0	0	0	0	0	3	1389	1	1781	0	0	0	0	0	0	0	0	0	0	0	0	0	0	0	0	0	0	0	0
1:22369315-22371392	AT1G60780,	10	-	0	0	0	0	0	0	0	0	2	728	0	0	0	0	1	1372	0	0	0	0	0	0	0	0	0	0	0	0	0	0	0	0	1	784	0	0
1:2259003-2259152	AT1G07350,	1	-	0	0	0	0	0	0	0	0	0	0	1	415	0	0	0	0	0	0	1	29	0	0	1	76	0	0	0	0	0	0	0	0	1	150	0	0
1:22685800-22705416	n/a		-	0	0	0	0	0	0	0	0	0	0	0	0	1	36	2	53	0	0	0	0	0	0	0	0	0	0	1	0	0	0	0	0	0	0	0	0
1:22700837-22701002	AT1G61520,	1	+	0	0	0	0	0	0	0	0	0	0	0	0	0	0	0	0	0	0	0	0	0	0	4	101531	0	0	0	0	0	0	0	0	0	0	0	0
1:22721192-22721601	AT1G61580,	1	-	0	0	0	0	0	0	1	210	0	0	0	0	1	285	2	333	0	0	0	0	0	0	0	0	0	0	0	0	0	0	0	0	0	0	0	0
1:23249655-23250076	AT1G62780,	3	-	0	0	0	0	0	0	1	1002	0	0	0	0	0	0	0	0	0	0	2	723	0	0	0	0	0	0	0	0	0	0	0	0	0	0	1	671
1:2402081-2402458	AT1G07745,	2	-	0	0	0	0	0	0	0	0	0	0	1	69	0	0	3	118	0	0	0	0	0	0	0	0	0	0	0	0	0	0	0	0	0	0	0	0
1:24238820-24239053	AT1G65260,	2	+	0	0	0	0	0	0	1	1016	0	0	1	568	1	341	0	0	0	0	0	0	0	0	0	0	0	0	0	0	1	560	0	0	0	0	0	0
1:24528107-24528644	AT1G65920,	3	-	0	0	0	0	0	0	0	0	1	143	1	261	1	144	1	169	0	0	0	0	0	0	0	0	0	0	0	0	0	0	0	0	0	0	0	0
1:24558075-24560390	n/a		-	0	0	0	0	0	0	0	0	0	0	0	0	3	2069	0	0	0	0	0	0	0	0	0	0	0	0	0	0	0	0	0	0	1	4304	0	0
1:24701222-24707801	n/a		-	0	0	0	0	0	0	0	0	0	0	0	0	4	2298	0	0	0	0	0	0	0	0	0	0	0	0	0	0	0	0	0	0	0	0	0	0
1:25230632-25230794	AT1G67340,	1	+	0	0	0	0	0	0	0	0	0	0	1	322	2	535	0	0	0	0	0	0	0	0	0	0	0	0	0	0	0	0	0	0	0	0	1	221
1:25650251-25652517	AT1G68410,	9	-	0	0	0	0	0	0	0	0	0	0	3	375	0	0	1	401	0	0	0	0	0	0	0	0	0	0	0	0	0	0	0	0	0	0	0	0
1:25694255-25694597	AT1G68490,	0	+	0	0	0	0	0	0	0	0	0	0	0	0	0	0	2	150	0	0	0	0	0	0	0	0	0	0	0	0	0	0	0	0	0	0	2	190
1:2605178-2606185	AT1G08260,	4	+	0	0	0	0	0	0	0	0	0	0	1	286	0	0	1	293	0	0	0	0	0	0	1	41	0	0	0	0	0	0	1	131	0	0	0	0
1:26221241-26221499	AT1G69700,	1	+	0	0	0	0	0	0	1	293	0	0	0	0	0	0	0	0	0	0	1	103	0	0	0	0	0	0	0	0	0	0	0	0	1	861	1	710
1:2625603-2626272	AT1G08320,	1	-	0	0	0	0	0	0	0	0	0	0	2	159	0	0	1	101	0	0	0	0	0	0	0	0	0	0	0	0	0	0	1	20	0	0	0	0
1:26535647-26536517	AT1G70410,	3	-	2	349	0	0	0	0	0	0	0	0	1	646	0	0	0	0	0	0	0	0	0	0	1	1101	0	0	0	0	0	0	0	0	0	0	0	0
1:26645584-26648058	n/a		+	0	0	0	0	0	0	0	0	0	0	2	1277	0	0	0	0	0	0	0	0	0	0	0	0	0	0	0	0	0	0	0	0	2	509	0	0
1:26656245-26656392	AT1G70700,	1	+	0	0	0	0	0	0	0	0	0	0	0	0	0	0	0	0	0	0	1	943	0	0	0	0	0	0	0	0	0	0	0	0	2	3965	1	3125
1:2669648-2669878	AT1G08450,	2	-	0	0	0	0	0	0	0	0	0	0	0	0	0	0	3	349	0	0	0	0	0	0	0	0	0	0	0	0	0	0	0	0	1	146	0	0
1:27435817-27439711	n/a		+	0	0	0	0	4	194	0	0	0	0	0	0	0	0	0	0	0	0	0	0	0	0	0	0	0	0	0	0	0	0	0	0	0	0	0	0
1:27525911-27526149	AT1G73200,	1	-	0	0	1	60	0	0	0	0	0	0	2	291	0	0	0	0	0	0	0	0	0	0	0	0	0	0	0	0	0	0	0	0	0	0	1	145
1:27915328-27915838	AT1G74230,	3	+	0	0	0	0	0	0	0	0	0	0	0	0	2	109	0	0	0	0	0	0	0	0	1	96	0	0	0	0	1	72	0	0	0	0	0	0
1:28009899-28010124	AT1G74530,	2	-	0	0	0	0	0	0	0	0	0	0	0	0	2	295	1	350	0	0	0	0	0	0	0	0	0	0	0	0	0	0	0	0	1	232	0	0
1:28063844-28064525	AT1G74690,	2	-	0	0	0	0	0	0	0	0	0	0	2	1884	0	0	0	0	0	0	0	0	0	0	0	0	0	0	0	0	0	0	2	1397	0	0	0	0
1:28139572-28139781	AT1G74920,	2	-	0	0	0	0	0	0	1	392	0	0	2	2670	0	0	0	0	0	0	0	0	0	0	0	0	0	0	0	0	0	0	1	917	0	0	0	0
1:28715783-28718696	n/a		+	0	0	0	0	0	0	0	0	0	0	0	0	0	0	0	0	0	0	0	0	0	0	0	0	0	0	0	0	0	0	0	0	0	0	4	117
1:289539-289776	AT1G01790,	2	+	0	0	0	0	2	385	0	0	1	56	0	0	0	0	0	0	0	0	0	0	0	0	0	0	1	215	0	0	0	0	0	0	0	0	0	0
1:29000276-29000426	AT1G77180,	1	-	0	0	1	496	0	0	0	0	1	630	2	1918	0	0	0	0	0	0	0	0	0	0	0	0	0	0	0	0	0	0	0	0	0	0	0	0
1:29823942-29825328	AT1G79280,	6	-	0	0	0	0	0	0	0	0	1	259	0	0	0	0	0	0	0	0	0	0	0	0	2	319	0	0	0	0	0	0	0	0	0	0	1	264
1:29824597-29825328	AT1G79280,	4	-	0	0	0	0	0	0	0	0	0	0	1	697	0	0	1	526	0	0	0	0	0	0	0	0	0	0	0	0	0	0	1	423	1	221	0	0
1:29861644-29862276	AT1G79380,	4	+	0	0	0	0	0	0	0	0	1	441	0	0	1	781	2	1052	0	0	0	0	0	0	0	0	0	0	0	0	0	0	0	0	0	0	0	0
1:29862000-29862276	AT1G79380,	2	+	0	0	0	0	0	0	0	0	0	0	0	0	0	0	1	1081	0	0	0	0	0	0	1	817	0	0	0	0	0	0	0	0	2	296	0	0
1:3016664-3016876	AT1G09340,	2	+	1	2143	0	0	2	3289	0	0	0	0	0	0	0	0	0	0	0	0	1	3881	0	0	0	0	0	0	0	0	0	0	0	0	0	0	0	0
1:30218493-30218677	AT1G80380,	2	+	0	0	0	0	2	925	0	0	0	0	0	0	1	671	1	766	0	0	0	0	0	0	0	0	0	0	0	0	0	0	0	0	0	0	0	0
1:30349061-30349237	AT1G80750,	1	+	0	0	0	0	0	0	0	0	0	0	0	0	0	0	1	1151	0	0	0	0	0	0	0	0	0	0	0	0	0	0	1	829	2	545	0	0
1:3055450-3057047	AT1G09470,	5	-	0	0	0	0	1	34	0	0	0	0	2	357	1	163	0	0	0	0	0	0	0	0	0	0	0	0	0	0	0	0	0	0	0	0	0	0
1:3196022-3198008	AT1G09840,	7	-	0	0	0	0	0	0	0	0	0	0	2	843	0	0	0	0	0	0	0	0	0	0	0	0	0	0	1	60	0	0	0	0	0	0	1	189
1:4041991-4042294	AT1G11960,	2	-	0	0	0	0	0	0	0	0	0	0	1	293	0	0	0	0	0	0	0	0	0	0	0	0	1	59	0	0	0	0	2	140	0	0	0	0
1:404912-405485	AT1G02145,	4	+	0	0	1	84	0	0	1	79	0	0	0	0	0	0	2	303	0	0	0	0	0	0	0	0	0	0	0	0	0	0	0	0	0	0	0	0
1:454415-455040	AT1G02300,	3	+	0	0	0	0	1	143	0	0	0	0	0	0	0	0	0	0	2	43	0	0	0	0	0	0	0	0	1	96	0	0	0	0	0	0	0	0
1:4990042-4990880	AT1G14580,	2	+	0	0	1	60	0	0	0	0	0	0	0	0	0	0	0	0	0	0	1	47	0	0	2	155	0	0	0	0	0	0	0	0	0	0	0	0
1:5015283-5015526	AT1G14620,	2	-	0	0	0	0	0	0	1	90	0	0	0	0	1	515	2	693	0	0	0	0	0	0	0	0	0	0	0	0	0	0	0	0	0	0	0	0
1:5207618-5207813	AT1G15130,	2	-	0	0	0	0	0	0	0	0	0	0	0	0	0	0	4	799	0	0	0	0	0	0	0	0	0	0	0	0	0	0	0	0	0	0	0	0
1:5233071-5233258	AT1G15210,	1	-	0	0	0	0	0	0	0	0	1	704	1	1842	0	0	2	1146	0	0	0	0	0	0	0	0	0	0	0	0	0	0	0	0	0	0	0	0
1:5245027-5246468	AT1G15240,	3	+	0	0	0	0	0	0	3	94	0	0	0	0	0	0	0	0	0	0	0	0	0	0	0	0	0	0	0	0	0	0	1	123	0	0	0	0
1:5297903-5298178	AT1G05163,	1	+	0	0	0	0	0	0	0	0	0	0	0	0	2	250304	2	299225	0	0	0	0	0	0	0	0	0	0	0	0	0	0	0	0	0	0	0	0
1:5400717-5400919	AT1G15690,	2	+	0	0	0	0	4	3710	0	0	0	0	0	0	0	0	0	0	0	0	0	0	0	0	0	0	0	0	0	0	0	0	0	0	0	0	0	0
1:554472-554863	AT1G02610,	2	-	0	0	0	0	0	0	0	0	0	0	0	0	0	0	0	0	0	0	0	0	0	0	3	638	0	0	0	0	0	0	0	0	0	0	1	112
1:5768208-5769143	AT1G16860,	1	+	0	0	0	0	0	0	0	0	2	473	2	792	0	0	0	0	0	0	0	0	0	0	0	0	0	0	0	0	0	0	0	0	0	0	0	0
1:5861173-5862258	AT1G17145,	6	-	0	0	0	0	1	113	0	0	0	0	0	0	0	0	0	0	0	0	0	0	0	0	1	203	0	0	1	68	0	0	1	273	0	0	0	0
1:5886631-5886772	AT1G17220,	1	+	0	0	0	0	0	0	0	0	0	0	0	0	0	0	0	0	0	0	0	0	0	0	2	1652	2	592	0	0	0	0	0	0	0	0	0	0
1:628246-628469	AT1G02840,	1	+	0	0	0	0	0	0	0	0	0	0	0	0	0	0	0	0	0	0	0	0	0	0	0	0	3	315	0	0	0	0	1	782	0	0	0	0
1:6292306-6293060	AT1G18270,	5	-	0	0	0	0	2	245	0	0	0	0	1	726	0	0	1	466	0	0	0	0	0	0	0	0	0	0	0	0	0	0	0	0	0	0	0	0
1:7144459-7144646	AT1G20620,	1	+	0	0	0	0	0	0	0	0	0	0	0	0	0	0	4	55778	0	0	0	0	0	0	0	0	0	0	0	0	0	0	0	0	0	0	0	0
1:7178120-7180581	n/a		+	0	0	0	0	0	0	0	0	0	0	2	6729	1	4952	1	6357	0	0	0	0	0	0	0	0	0	0	0	0	0	0	0	0	0	0	0	0
1:7178159-7178365	AT1G20693,	2	+	0	0	0	0	0	0	0	0	0	0	0	0	0	0	0	0	1	952	0	0	0	0	3	8277	0	0	0	0	0	0	0	0	0	0	0	0
1:7180393-7180754	AT1G20696,	3	+	0	0	0	0	0	0	0	0	4	2584	0	0	0	0	0	0	0	0	0	0	0	0	0	0	0	0	0	0	0	0	0	0	0	0	0	0
1:7486781-7487277	AT1G21380,	3	-	0	0	0	0	0	0	0	0	0	0	0	0	0	0	0	0	0	0	0	0	0	0	4	418	0	0	0	0	0	0	0	0	0	0	0	0
1:753727-753895	AT1G03130,	1	-	2	3866	0	0	0	0	1	10964	0	0	0	0	0	0	0	0	1	2741	0	0	0	0	0	0	0	0	0	0	0	0	0	0	0	0	0	0
1:8014799-8015684	AT1G22650,	2	-	0	0	0	0	0	0	1	63	2	88	1	132	0	0	0	0	0	0	0	0	0	0	0	0	0	0	0	0	0	0	0	0	0	0	0	0
1:8348204-8348536	AT1G23540,	2	+	0	0	0	0	0	0	0	0	0	0	0	0	0	0	0	0	0	0	0	0	0	0	0	0	0	0	0	0	0	0	0	0	0	0	4	12
1:8594446-8594697	AT1G24260,	2	-	0	0	0	0	0	0	0	0	0	0	0	0	0	0	0	0	0	0	0	0	0	0	0	0	0	0	0	0	0	0	3	1376	1	2535	0	0
1:8771958-8837534	n/a		-	0	0	0	0	0	0	0	0	0	0	0	0	0	0	4	911	0	0	0	0	0	0	0	0	0	0	0	0	0	0	0	0	0	0	0	0
2:10102533-10102858	AT2G23740,	2	+	0	0	0	0	0	0	0	0	0	0	0	0	0	0	0	0	0	0	0	0	0	0	1	161	0	0	0	0	2	100	1	167	0	0	0	0
2:10823992-10824148	AT2G25430,	1	-	0	0	0	0	0	0	0	0	0	0	0	0	0	0	1	1360	0	0	2	227	0	0	0	0	0	0	0	0	0	0	1	772	0	0	0	0
2:10956705-10957579	AT2G25730,	3	-	0	0	0	0	1	63	0	0	0	0	0	0	0	0	2	400	0	0	0	0	1	91	0	0	0	0	0	0	0	0	0	0	0	0	0	0
2:11615807-11617091	AT2G27170,	6	-	0	0	0	0	0	0	0	0	2	183	0	0	0	0	0	0	0	0	0	0	0	0	0	0	0	0	0	0	0	0	0	0	1	249	1	245
2:12269366-12270076	AT2G28620,	3	-	0	0	0	0	0	0	0	0	0	0	0	0	0	0	0	0	0	0	0	0	0	0	0	0	0	0	0	0	1	98	2	214	0	0	1	187
2:13019488-13019633	AT2G30570,	1	-	0	0	0	0	0	0	0	0	0	0	0	0	0	0	0	0	2	12099	0	0	0	0	0	0	0	0	0	0	2	9003	0	0	0	0	0	0
2:13139728-13139873	AT2G30860,	1	-	0	0	0	0	0	0	0	0	2	22529	2	29630	0	0	0	0	0	0	0	0	0	0	0	0	0	0	0	0	0	0	0	0	0	0	0	0
2:13145030-13145582	AT2G30880,	3	-	0	0	0	0	0	0	0	0	0	0	0	0	1	298	0	0	0	0	0	0	0	0	1	160	0	0	0	0	0	0	0	0	0	0	2	221
2:13159010-13159248	AT2G30920,	2	-	0	0	0	0	0	0	0	0	0	0	1	132	2	156	0	0	0	0	0	0	0	0	1	65	0	0	0	0	0	0	0	0	0	0	0	0
2:13188796-13189029	AT2G30990,	1	-	0	0	0	0	0	0	0	0	2	312	1	460	0	0	0	0	0	0	0	0	0	0	0	0	0	0	0	0	0	0	1	108	0	0	0	0
2:13520787-13521178	AT2G31800,	2	-	2	102	0	0	0	0	1	298	0	0	0	0	0	0	1	673	0	0	0	0	0	0	0	0	0	0	0	0	0	0	0	0	0	0	0	0
2:13772416-13772784	AT2G32430,	2	+	0	0	0	0	0	0	0	0	0	0	4	351	0	0	0	0	0	0	0	0	0	0	0	0	0	0	0	0	0	0	0	0	0	0	0	0
2:13867526-13868171	AT2G32700,	3	+	0	0	0	0	0	0	1	429	1	830	0	0	1	1184	1	1561	0	0	0	0	0	0	0	0	0	0	0	0	0	0	0	0	0	0	0	0
2:14522638-14522801	AT2G08665,AT2G34420,	1	+	0	0	0	0	2	72184	0	0	0	0	0	0	0	0	0	0	1	28788	0	0	0	0	0	0	0	0	0	0	1	17144	0	0	0	0	0	0
2:15001500-15001909	AT2G35690,	2	+	0	0	0	0	0	0	0	0	0	0	0	0	0	0	1	92	0	0	1	60	0	0	0	0	0	0	0	0	0	0	1	91	0	0	1	106
2:15322418-15322600	AT2G36530,	1	-	0	0	0	0	0	0	0	0	0	0	1	7203	1	6510	0	0	0	0	0	0	0	0	2	2417	0	0	0	0	0	0	0	0	0	0	0	0
2:15458441-15458906	AT2G36850,	2	-	0	0	0	0	0	0	0	0	0	0	0	0	0	0	0	0	0	0	0	0	0	0	0	0	0	0	0	0	4	131	0	0	0	0	0	0
2:15583686-15584111	AT2G37080,	2	-	1	75	0	0	0	0	0	0	0	0	0	0	0	0	1	340	0	0	0	0	0	0	2	56	0	0	0	0	0	0	0	0	0	0	0	0
2:15726965-15727370	AT2G37460,	2	-	0	0	0	0	0	0	0	0	0	0	1	1384	0	0	1	718	0	0	0	0	0	0	2	301	0	0	0	0	0	0	0	0	0	0	0	0
2:15740064-15740666	AT2G37500,	4	-	0	0	0	0	0	0	0	0	1	236	0	0	0	0	2	468	0	0	0	0	0	0	1	229	0	0	0	0	0	0	0	0	0	0	0	0
2:15753703-15753847	AT2G37540,	1	-	0	0	0	0	0	0	0	0	0	0	0	0	0	0	0	0	0	0	2	289	2	160	0	0	0	0	0	0	0	0	0	0	0	0	0	0
2:15910350-15910878	AT2G38020,	3	-	0	0	0	0	0	0	0	0	0	0	2	474	0	0	0	0	0	0	0	0	0	0	0	0	0	0	1	64	0	0	0	0	0	0	1	219
2:15973476-15974429	AT2G38120,	4	+	0	0	0	0	0	0	0	0	0	0	3	4319	0	0	0	0	0	0	0	0	0	0	0	0	0	0	0	0	0	0	0	0	1	1338	0	0
2:16130554-16130715	AT2G38540,	1	+	0	0	0	0	0	0	0	0	0	0	0	0	0	0	0	0	0	0	0	0	0	0	0	0	0	0	0	0	1	22581	1	36285	2	62814	0	0
2:16406297-16406655	AT2G39280,	2	-	0	0	1	115	0	0	0	0	0	0	1	574	0	0	2	514	0	0	0	0	0	0	0	0	0	0	0	0	0	0	0	0	0	0	0	0
2:16421373-16421591	AT2G39330,	1	-	0	0	0	0	0	0	0	0	0	0	0	0	0	0	0	0	0	0	0	0	2	14	0	0	0	0	0	0	0	0	1	1007	0	0	1	348
2:16502659-16503745	AT2G39550,	6	+	0	0	0	0	0	0	0	0	0	0	0	0	1	265	0	0	0	0	0	0	0	0	0	0	0	0	0	0	0	0	0	0	1	111	2	97
2:16589744-16589897	AT2G39770,	1	+	0	0	0	0	0	0	0	0	0	0	0	0	1	3260	0	0	0	0	0	0	0	0	0	0	0	0	0	0	2	1727	1	2913	0	0	0	0
2:16614086-16615133	AT2G39810,	2	+	0	0	0	0	1	97	0	0	0	0	0	0	0	0	0	0	0	0	0	0	1	50	0	0	0	0	0	0	0	0	0	0	1	160	1	163
2:16659080-16659817	AT2G39900,	4	+	0	0	0	0	0	0	0	0	1	1587	0	0	2	1627	0	0	0	0	0	0	0	0	0	0	0	0	0	0	1	352	0	0	0	0	0	0
2:16945728-16946259	AT2G40590,	3	-	1	266	0	0	0	0	0	0	0	0	1	635	0	0	0	0	0	0	0	0	0	0	0	0	0	0	0	0	0	0	0	0	0	0	2	1099
2:17737315-17737537	AT2G42600,	1	-	0	0	0	0	1	1751	1	1734	0	0	0	0	2	1257	0	0	0	0	0	0	0	0	0	0	0	0	0	0	0	0	0	0	0	0	0	0
2:17954032-17954228	AT2G43180,	1	-	0	0	0	0	0	0	0	0	0	0	1	100	0	0	1	79	0	0	0	0	0	0	0	0	1	58	1	60	0	0	0	0	0	0	0	0
2:1799604-1823672	n/a		-	0	0	0	0	0	0	2	26056	0	0	0	0	0	0	0	0	0	0	0	0	0	0	0	0	0	0	0	0	0	0	0	0	1	11727	1	10131
2:18101432-18101746	AT2G43650,	2	+	0	0	0	0	0	0	0	0	0	0	2	299	0	0	0	0	0	0	1	33	0	0	0	0	0	0	0	0	0	0	0	0	1	181	0	0
2:18185607-18186540	AT2G43910,	3	-	0	0	0	0	0	0	1	2094	0	0	0	0	0	0	0	0	0	0	0	0	0	0	3	1620	0	0	0	0	0	0	0	0	0	0	0	0
2:18241799-18242302	AT2G44100,	2	+	0	0	1	523	0	0	0	0	0	0	0	0	0	0	3	2946	0	0	0	0	0	0	0	0	0	0	0	0	0	0	0	0	0	0	0	0
2:19003901-19004093	AT2G46280,	2	-	0	0	0	0	2	600	0	0	0	0	0	0	0	0	1	2356	0	0	0	0	0	0	0	0	0	0	0	0	0	0	0	0	0	0	1	894
2:19530881-19531177	AT2G47610,	2	+	0	0	0	0	0	0	0	0	0	0	0	0	0	0	0	0	0	0	0	0	0	0	0	0	0	0	0	0	0	0	4	6584	0	0	0	0
2:2229911-2230199	AT2G05830,	2	+	0	0	0	0	0	0	0	0	0	0	0	0	0	0	0	0	0	0	0	0	0	0	1	338	1	153	0	0	0	0	1	305	1	373	0	0
2:269324-270206	AT2G01600,	5	+	0	0	0	0	0	0	1	242	2	409	0	0	0	0	0	0	0	0	0	0	0	0	1	289	0	0	0	0	0	0	0	0	0	0	0	0
2:4485020-4493960	n/a		+	0	0	0	0	0	0	0	0	0	0	0	0	0	0	2	8	0	0	0	0	0	0	2	2	0	0	0	0	0	0	0	0	0	0	0	0
2:466333-466511	AT2G01990,	1	-	0	0	0	0	0	0	0	0	4	356	0	0	0	0	0	0	0	0	0	0	0	0	0	0	0	0	0	0	0	0	0	0	0	0	0	0
2:5006417-5006701	AT2G12400,	1	-	0	0	0	0	0	0	0	0	0	0	1	468	0	0	0	0	0	0	0	0	0	0	0	0	0	0	0	0	0	0	0	0	1	295	2	246
2:538673-540134	n/a		+	0	0	0	0	0	0	0	0	0	0	0	0	0	0	0	0	0	0	2	435	0	0	0	0	0	0	0	0	1	873	1	1451	0	0	0	0
2:5539633-5539843	AT2G13360,	1	-	0	0	0	0	0	0	0	0	0	0	0	0	0	0	1	129	0	0	1	6935	0	0	2	15192	0	0	0	0	0	0	0	0	0	0	0	0
2:6811560-6811848	AT2G15620,	1	+	0	0	0	0	0	0	0	0	0	0	1	1634	1	1034	2	1286	0	0	0	0	0	0	0	0	0	0	0	0	0	0	0	0	0	0	0	0
2:7444508-7444725	AT2G17110,	1	-	0	0	0	0	0	0	0	0	0	0	0	0	0	0	1	140	0	0	0	0	0	0	0	0	0	0	0	0	0	0	1	94	2	72	0	0
2:7533688-7534083	AT2G17320,	3	-	0	0	0	0	0	0	0	0	0	0	2	242	0	0	0	0	0	0	0	0	0	0	0	0	1	72	0	0	0	0	0	0	0	0	1	95
2:7600495-7601704	n/a		+	0	0	0	0	0	0	0	0	0	0	0	0	0	0	1	1	0	0	0	0	0	0	0	0	0	0	0	0	0	0	3	10	0	0	0	0
2:7607315-7607540	AT2G17500,	2	+	0	0	0	0	0	0	0	0	2	889	1	1379	0	0	0	0	0	0	0	0	0	0	0	0	0	0	0	0	0	0	0	0	1	529	0	0
2:7664556-7665071	AT2G17620,	3	+	0	0	0	0	0	0	1	25	1	39	0	0	0	0	1	99	0	0	0	0	0	0	0	0	0	0	0	0	0	0	0	0	0	0	1	46
2:7664556-7665738	AT2G17620,	6	+	0	0	0	0	0	0	0	0	0	0	0	0	0	0	1	84	0	0	0	0	0	0	1	4	0	0	0	0	0	0	0	0	2	54	0	0
2:8280926-8281183	AT2G19110,	1	+	0	0	0	0	0	0	0	0	1	406	0	0	0	0	1	489	0	0	0	0	1	35	0	0	0	0	0	0	0	0	0	0	0	0	1	440
2:8512519-8512945	AT2G19730,	2	+	1	1846	0	0	0	0	0	0	0	0	0	0	0	0	2	6475	0	0	0	0	0	0	0	0	0	0	0	0	0	0	1	3786	0	0	0	0
2:8593357-8593711	AT2G19900,	3	-	0	0	0	0	0	0	0	0	0	0	0	0	2	156	2	177	0	0	0	0	0	0	0	0	0	0	0	0	0	0	0	0	0	0	0	0
2:8678730-8679215	AT2G20100,	2	+	0	0	0	0	0	0	0	0	0	0	0	0	2	653	1	776	0	0	0	0	0	0	0	0	0	0	0	0	0	0	1	148	0	0	0	0
2:8688674-8691628	n/a		-	0	0	0	0	0	0	1	131	0	0	0	0	0	0	0	0	0	0	0	0	0	0	0	0	0	0	0	0	0	0	2	225	1	200	0	0
2:8704440-8704608	AT2G20180,	1	-	0	0	0	0	1	161	0	0	2	26	0	0	0	0	0	0	0	0	1	116	0	0	0	0	0	0	0	0	0	0	0	0	0	0	0	0
2:8856297-8856860	AT2G20570,	2	+	0	0	1	682	0	0	0	0	0	0	0	0	0	0	0	0	0	0	0	0	0	0	2	4871	1	517	0	0	0	0	0	0	0	0	0	0
2:9953996-9954317	AT2G23370,	2	-	0	0	0	0	0	0	0	0	0	0	0	0	0	0	1	145	0	0	1	30	0	0	0	0	0	0	0	0	0	0	1	89	1	91	0	0
3:10334414-10334605	AT3G27870,	1	+	1	3	0	0	0	0	0	0	0	0	0	0	1	131	0	0	0	0	0	0	0	0	0	0	0	0	0	0	1	31	0	0	1	84	0	0
3:10614957-10627509	n/a		-	0	0	0	0	0	0	0	0	0	0	3	6	0	0	1	2	0	0	0	0	0	0	0	0	0	0	0	0	0	0	0	0	0	0	0	0
3:10744962-10745550	AT3G28670,	3	+	1	29	0	0	0	0	0	0	0	0	0	0	0	0	0	0	0	0	0	0	0	0	0	0	0	0	0	0	0	0	0	0	3	130	0	0
3:10912617-10912777	AT3G28910,	1	+	0	0	0	0	0	0	0	0	0	0	0	0	0	0	0	0	0	0	0	0	0	0	0	0	0	0	0	0	0	0	2	209	2	320	0	0
3:11165463-11165846	AT3G29200,	2	-	0	0	0	0	1	254	0	0	0	0	0	0	1	475	0	0	0	0	0	0	0	0	0	0	0	0	0	0	0	0	0	0	1	673	1	533
3:1361001-1361401	AT3G04920,	2	+	0	0	0	0	1	1558	0	0	0	0	0	0	0	0	2	4575	0	0	0	0	0	0	0	0	0	0	0	0	1	2148	0	0	0	0	0	0
3:1361360-1361554	AT3G04920,	2	+	0	0	0	0	0	0	1	2193	0	0	0	0	0	0	3	6302	0	0	0	0	0	0	0	0	0	0	0	0	0	0	0	0	0	0	0	0
3:15819881-15820170	AT3G44050,	2	+	1	52	0	0	0	0	0	0	1	101	0	0	0	0	1	160	0	0	0	0	0	0	1	8	0	0	0	0	0	0	0	0	0	0	0	0
3:16228279-16228498	AT3G44680,	1	-	0	0	0	0	0	0	0	0	1	143	1	284	1	209	0	0	0	0	0	0	0	0	0	0	0	0	0	0	0	0	1	171	0	0	0	0
3:16310118-16314011	n/a		+	0	0	0	0	0	0	0	0	0	0	1	151	1	104	1	129	0	0	0	0	0	0	0	0	0	0	0	0	1	14	0	0	0	0	0	0
3:17169794-17174520	n/a		-	0	0	1	7	0	0	0	0	0	0	2	88	1	47	0	0	0	0	0	0	0	0	0	0	0	0	0	0	0	0	0	0	0	0	0	0
3:17169799-17170605	AT3G46614,	5	-	0	0	0	0	0	0	0	0	1	65	2	52	0	0	0	0	0	0	0	0	0	0	0	0	0	0	0	0	1	4	0	0	0	0	0	0
3:17171839-17172914	n/a		-	0	0	0	0	0	0	0	0	2	52	2	94	0	0	0	0	0	0	0	0	0	0	0	0	0	0	0	0	0	0	0	0	0	0	0	0
3:17281593-17282009	AT3G46920,	2	-	0	0	0	0	1	20	0	0	0	0	0	0	1	90	0	0	0	0	0	0	0	0	0	0	0	0	0	0	0	0	0	0	2	57	0	0
3:17303151-17303354	AT3G46970,	1	-	0	0	0	0	2	651	0	0	0	0	0	0	0	0	0	0	0	0	0	0	1	1955	0	0	0	0	0	0	1	396	0	0	0	0	0	0
3:1765841-1766461	AT3G05910,	3	-	0	0	0	0	1	710	0	0	1	538	0	0	2	879	0	0	0	0	0	0	0	0	0	0	0	0	0	0	0	0	0	0	0	0	0	0
3:18230091-18230338	AT3G49180,	1	+	1	54	0	0	0	0	0	0	0	0	0	0	0	0	1	252	0	0	0	0	0	0	1	49	0	0	0	0	0	0	0	0	1	143	0	0
3:18286828-18287233	AT3G49310,	2	-	0	0	0	0	0	0	0	0	1	314	2	446	0	0	0	0	0	0	0	0	0	0	0	0	1	62	0	0	0	0	0	0	0	0	0	0
3:18485359-18485646	AT3G49840,	2	+	0	0	0	0	0	0	0	0	0	0	3	143	0	0	0	0	0	0	0	0	0	0	0	0	0	0	0	0	0	0	1	66	0	0	0	0
3:18485718-18486058	AT3G49840,	2	+	0	0	0	0	0	0	0	0	1	84	0	0	0	0	0	0	0	0	0	0	0	0	0	0	2	6	0	0	0	0	1	64	0	0	0	0
3:18485718-18486334	AT3G49840,	3	+	0	0	0	0	0	0	0	0	1	65	0	0	1	107	1	134	0	0	0	0	0	0	0	0	0	0	0	0	0	0	0	0	1	59	0	0
3:18941042-18941251	AT3G50970,	1	+	0	0	0	0	0	0	0	0	4	1325	0	0	0	0	0	0	0	0	0	0	0	0	0	0	0	0	0	0	0	0	0	0	0	0	0	0
3:19293705-19296815	n/a		+	0	0	0	0	0	0	0	0	0	0	0	0	0	0	0	0	0	0	0	0	0	0	0	0	0	0	0	0	1	59	2	109	1	110	0	0
3:19363430-19364575	AT3G52200,	5	+	0	0	0	0	0	0	0	0	0	0	0	0	0	0	0	0	0	0	0	0	0	0	4	277	0	0	0	0	0	0	0	0	0	0	0	0
3:209100-209478	AT3G01520,	2	+	0	0	0	0	0	0	0	0	0	0	0	0	0	0	3	2060	0	0	0	0	0	0	0	0	0	0	1	309	0	0	0	0	0	0	0	0
3:21113944-21114330	AT3G57050,	2	-	0	0	0	0	0	0	0	0	0	0	0	0	1	1026	0	0	0	0	0	0	3	319	0	0	0	0	0	0	0	0	0	0	0	0	0	0
3:21409007-21409295	AT3G57800,	2	-	0	0	1	192	0	0	0	0	0	0	0	0	1	55	0	0	0	0	1	102	0	0	0	0	0	0	0	0	0	0	1	501	0	0	0	0
3:2148272-2148569	AT3G06810,	2	+	0	0	0	0	1	129	0	0	0	0	0	0	0	0	0	0	0	0	0	0	0	0	0	0	1	82	0	0	0	0	1	329	0	0	1	354
3:21577302-21577672	AT3G58270,	2	-	0	0	0	0	0	0	0	0	0	0	1	231	0	0	2	262	0	0	0	0	0	0	0	0	0	0	0	0	0	0	0	0	1	77	0	0
3:21636958-21637592	AT3G58500,	3	-	0	0	0	0	0	0	1	634	1	1108	0	0	0	0	0	0	0	0	0	0	0	0	1	583	0	0	0	0	0	0	0	0	1	1023	0	0
3:21672047-21672408	AT3G58610,	2	+	0	0	0	0	0	0	0	0	0	0	0	0	4	2040	0	0	0	0	0	0	0	0	0	0	0	0	0	0	0	0	0	0	0	0	0	0
3:21744130-21745429	AT3G58790,	2	-	0	0	0	0	0	0	0	0	0	0	1	377	1	660	1	931	0	0	1	104	0	0	0	0	0	0	0	0	0	0	0	0	0	0	0	0
3:21923329-21927224	n/a		-	0	0	0	0	0	0	0	0	0	0	0	0	0	0	0	0	0	0	0	0	0	0	3	206	0	0	1	145	0	0	0	0	0	0	0	0
3:2244277-2244505	AT3G07090,	2	-	1	76	0	0	0	0	0	0	0	0	2	582	0	0	0	0	0	0	1	77	0	0	0	0	0	0	0	0	0	0	0	0	0	0	0	0
3:22656402-22656584	AT3G61198,	1	-	0	0	0	0	0	0	0	0	0	0	0	0	0	0	0	0	0	0	0	0	0	0	0	0	0	0	0	0	0	0	0	0	4	14051	0	0
3:22656402-22656598	AT3G61198,	1	-	0	0	0	0	0	0	0	0	0	0	0	0	2	656	0	0	0	0	0	0	0	0	0	0	0	0	0	0	0	0	0	0	2	885	0	0
3:2582395-2582640	AT3G08510,	1	-	1	223	0	0	1	488	0	0	0	0	0	0	0	0	0	0	0	0	0	0	0	0	0	0	0	0	0	0	0	0	1	1098	1	523	0	0
3:2697287-2697512	AT3G08860,	1	-	0	0	0	0	0	0	0	0	0	0	0	0	1	712	3	800	0	0	0	0	0	0	0	0	0	0	0	0	0	0	0	0	0	0	0	0
3:2840953-2841225	AT3G09260,	2	+	0	0	0	0	0	0	0	0	1	50708	2	95054	0	0	1	30455	0	0	0	0	0	0	0	0	0	0	0	0	0	0	0	0	0	0	0	0
3:3224717-3224877	AT3G10380,	1	-	1	94	0	0	0	0	1	306	1	420	0	0	0	0	1	833	0	0	0	0	0	0	0	0	0	0	0	0	0	0	0	0	0	0	0	0
3:3363732-3363935	AT3G10740,	2	-	0	0	0	0	0	0	0	0	0	0	2	2457	0	0	0	0	0	0	0	0	0	0	0	0	0	0	0	0	2	678	0	0	0	0	0	0
3:3447716-3450290	AT3G11000,	8	+	0	0	0	0	0	0	0	0	0	0	0	0	0	0	0	0	0	0	0	0	0	0	0	0	0	0	0	0	0	0	0	0	2	145	2	182
3:3633395-3635113	AT3G11540,	7	+	0	0	0	0	0	0	0	0	2	229	0	0	1	488	0	0	0	0	0	0	0	0	1	127	0	0	0	0	0	0	0	0	0	0	0	0
3:3917132-3917821	AT3G12280,	3	-	0	0	0	0	1	130	0	0	0	0	0	0	0	0	0	0	0	0	0	0	0	0	0	0	0	0	0	0	1	166	1	314	0	0	1	271
3:4248508-4249160	AT3G13220,	2	-	0	0	0	0	0	0	0	0	0	0	0	0	0	0	0	0	0	0	0	0	0	0	0	0	0	0	0	0	1	15	0	0	3	69	0	0
3:4323287-4323467	AT3G13330,	2	-	1	26	0	0	1	118	0	0	1	182	1	398	0	0	0	0	0	0	0	0	0	0	0	0	0	0	0	0	0	0	0	0	0	0	0	0
3:4404736-4404900	AT3G13510,	1	+	0	0	0	0	0	0	1	193	1	698	0	0	0	0	0	0	0	0	0	0	0	0	1	100	0	0	0	0	0	0	0	0	0	0	1	872
3:4404983-4405175	AT3G13510,	2	+	1	77	1	123	0	0	0	0	0	0	1	775	0	0	0	0	0	0	0	0	0	0	0	0	0	0	0	0	1	453	0	0	0	0	0	0
3:4818651-4819185	AT3G14415,	3	+	0	0	0	0	3	2962	0	0	0	0	0	0	0	0	0	0	0	0	1	2072	0	0	0	0	0	0	0	0	0	0	0	0	0	0	0	0
3:5047635-5047835	AT3G14990,	1	+	0	0	0	0	0	0	0	0	0	0	0	0	1	7429	2	9423	0	0	0	0	0	0	0	0	0	0	0	0	0	0	0	0	0	0	1	754
3:5048110-5048711	AT3G14990,	3	+	0	0	0	0	0	0	1	664	1	6902	0	0	0	0	2	10258	0	0	0	0	0	0	0	0	0	0	0	0	0	0	0	0	0	0	0	0
3:512650-512821	AT3G02480,	2	+	0	0	0	0	0	0	0	0	0	0	0	0	0	0	0	0	0	0	0	0	0	0	0	0	0	0	0	0	0	0	0	0	4	2677	0	0
3:5454979-5455550	AT3G16080,	1	+	0	0	0	0	0	0	0	0	0	0	1	2119	0	0	0	0	0	0	1	295	0	0	1	495	0	0	0	0	0	0	0	0	1	2464	0	0
3:5579530-5579760	AT3G16420,	1	+	1	1124	0	0	0	0	2	2310	1	7124	0	0	0	0	0	0	0	0	0	0	0	0	0	0	0	0	0	0	0	0	0	0	0	0	0	0
3:5797895-5798512	AT3G17000,	3	+	0	0	0	0	0	0	0	0	0	0	0	0	0	0	3	624	1	51	0	0	0	0	0	0	0	0	0	0	0	0	0	0	0	0	0	0
3:6141325-6141732	AT3G17920,	2	+	0	0	0	0	0	0	0	0	1	103	1	155	0	0	2	198	0	0	0	0	0	0	0	0	0	0	0	0	0	0	0	0	0	0	0	0
3:6768974-6769468	AT3G19515,	3	-	0	0	0	0	0	0	2	126	1	182	0	0	0	0	0	0	0	0	0	0	0	0	0	0	0	0	0	0	0	0	0	0	1	204	0	0
3:7003071-7003632	AT3G20060,	3	-	0	0	0	0	0	0	0	0	0	0	2	702	0	0	2	1067	0	0	0	0	0	0	0	0	0	0	0	0	0	0	0	0	0	0	0	0
3:7956137-7956444	AT3G22430,	1	+	0	0	0	0	0	0	0	0	0	0	1	176	1	116	2	141	0	0	0	0	0	0	0	0	0	0	0	0	0	0	0	0	0	0	0	0
3:8173689-8173860	AT3G23000,	1	+	0	0	0	0	0	0	0	0	2	1702	0	0	0	0	0	0	0	0	0	0	2	264	0	0	0	0	0	0	0	0	0	0	0	0	0	0
3:8322143-8323014	AT3G23280,	5	+	0	0	0	0	1	442	0	0	0	0	3	719	0	0	0	0	0	0	0	0	0	0	0	0	0	0	0	0	0	0	0	0	0	0	0	0
3:8474149-8475673	AT3G23600,	6	+	0	0	0	0	0	0	0	0	0	0	0	0	4	1706	0	0	0	0	0	0	0	0	0	0	0	0	0	0	0	0	0	0	0	0	0	0
3:8481481-8481663	AT3G23620,	2	+	0	0	0	0	0	0	0	0	0	0	3	725	0	0	1	804	0	0	0	0	0	0	0	0	0	0	0	0	0	0	0	0	0	0	0	0
3:853610-854040	AT3G03560,	3	-	0	0	0	0	0	0	0	0	0	0	1	290	0	0	3	348	0	0	0	0	0	0	0	0	0	0	0	0	0	0	0	0	0	0	0	0
3:8663441-8664787	AT3G23980,	6	-	0	0	0	0	0	0	0	0	2	307	0	0	0	0	0	0	0	0	0	0	0	0	0	0	0	0	0	0	0	0	0	0	2	303	0	0
3:9492040-9492403	AT3G25920,	1	-	1	3107	0	0	1	3982	0	0	0	0	0	0	0	0	0	0	0	0	0	0	0	0	0	0	0	0	0	0	0	0	0	0	2	2792	0	0
4:10131390-10131726	AT4G18340,	1	-	0	0	0	0	0	0	0	0	0	0	1	847	1	578	2	820	0	0	0	0	0	0	0	0	0	0	0	0	0	0	0	0	0	0	0	0
4:10864124-10864285	AT4G20070,	1	+	0	0	0	0	0	0	0	0	1	150	0	0	0	0	0	0	0	0	0	0	1	95	2	376	0	0	0	0	0	0	0	0	0	0	0	0
4:10986580-10987419	AT4G20340,	3	+	2	15	1	34	0	0	0	0	0	0	0	0	0	0	0	0	0	0	0	0	0	0	0	0	0	0	0	0	0	0	1	93	0	0	0	0
4:1108965-1109240	AT4G02510,	1	+	0	0	0	0	0	0	0	0	0	0	0	0	0	0	0	0	0	0	0	0	4	502	0	0	0	0	0	0	0	0	0	0	0	0	0	0
4:1131296-1131757	AT4G02570,	3	+	0	0	2	462	0	0	0	0	0	0	0	0	0	0	0	0	0	0	0	0	0	0	0	0	0	0	0	0	0	0	2	976	0	0	0	0
4:1135994-1136216	AT4G02580,	2	+	0	0	0	0	0	0	0	0	0	0	0	0	2	1399	0	0	0	0	0	0	0	0	0	0	0	0	0	0	0	0	0	0	1	1135	1	1059
4:11460245-11460715	AT4G21540,	2	+	0	0	0	0	0	0	0	0	0	0	2	368	0	0	0	0	1	15	0	0	0	0	0	0	0	0	0	0	0	0	0	0	1	119	0	0
4:11493153-11502133	n/a		-	0	0	0	0	0	0	0	0	0	0	0	0	0	0	0	0	0	0	0	0	0	0	0	0	0	0	0	0	0	0	0	0	0	0	4	2339
4:11507955-11508386	AT4G21660,	3	-	0	0	0	0	0	0	0	0	0	0	2	1517	0	0	1	1019	0	0	1	257	0	0	0	0	0	0	0	0	0	0	0	0	0	0	0	0
4:11648129-11648278	AT4G21960,	1	+	0	0	0	0	0	0	0	0	2	30313	0	0	2	58012	0	0	0	0	0	0	0	0	0	0	0	0	0	0	0	0	0	0	0	0	0	0
4:11781539-11806448	n/a		-	0	0	0	0	0	0	0	0	0	0	0	0	0	0	0	0	0	0	0	0	0	0	0	0	0	0	0	0	0	0	0	0	4	227	0	0
4:11931425-11931560	AT4G22690,	1	+	0	0	0	0	1	1003	0	0	0	0	0	0	1	5178	2	6056	0	0	0	0	0	0	0	0	0	0	0	0	0	0	0	0	0	0	0	0
4:11998415-11999072	AT4G22860,	3	+	0	0	0	0	0	0	0	0	1	18	1	58	0	0	0	0	1	0	0	0	0	0	0	0	0	0	1	1	0	0	0	0	0	0	0	0
4:12657713-12658159	AT4G24490,	2	-	0	0	0	0	3	121	0	0	0	0	0	0	0	0	0	0	0	0	0	0	0	0	0	0	0	0	0	0	0	0	1	237	0	0	0	0
4:12663046-12664777	AT4G24520,	8	-	2	65	0	0	0	0	0	0	0	0	0	0	0	0	0	0	0	0	0	0	0	0	0	0	0	0	0	0	0	0	2	467	0	0	0	0
4:13033674-13034815	AT4G25520,	5	-	0	0	0	0	0	0	1	87	0	0	2	247	0	0	0	0	0	0	0	0	0	0	0	0	0	0	0	0	0	0	0	0	1	147	0	0
4:13309694-13310243	AT4G26300,	3	-	0	0	0	0	0	0	0	0	0	0	0	0	1	544	1	681	0	0	1	162	1	117	0	0	0	0	0	0	0	0	0	0	0	0	0	0
4:13432342-13433049	AT4G26630,	4	-	0	0	0	0	0	0	0	0	1	87	0	0	1	247	0	0	0	0	0	0	0	0	0	0	0	0	0	0	0	0	1	202	1	157	0	0
4:14029739-14030349	AT4G28360,	3	-	0	0	0	0	0	0	0	0	0	0	2	241	2	396	0	0	0	0	0	0	0	0	0	0	0	0	0	0	0	0	0	0	0	0	0	0
4:14130385-14130652	AT4G28600,	1	+	1	42	0	0	0	0	0	0	0	0	0	0	0	0	0	0	0	0	2	86	0	0	0	0	0	0	0	0	0	0	1	244	0	0	0	0
4:14145474-14145686	AT4G28650,AT4G28652,	1	+	0	0	0	0	0	0	0	0	4	84	0	0	0	0	0	0	0	0	0	0	0	0	0	0	0	0	0	0	0	0	0	0	0	0	0	0
4:14203017-14203225	AT4G28750,	2	-	0	0	0	0	0	0	0	0	0	0	0	0	0	0	0	0	4	7919	0	0	0	0	0	0	0	0	0	0	0	0	0	0	0	0	0	0
4:14498511-14499023	AT4G29540,	3	+	2	11	0	0	0	0	0	0	0	0	0	0	0	0	1	68	0	0	0	0	0	0	0	0	0	0	0	0	0	0	0	0	0	0	1	46
4:14755822-14755984	AT4G30160,	1	+	0	0	0	0	0	0	0	0	0	0	0	0	1	532	1	611	0	0	0	0	0	0	0	0	0	0	0	0	0	0	2	407	0	0	0	0
4:1502579-1503162	AT4G03410,	3	+	0	0	1	87	0	0	0	0	0	0	0	0	2	133	0	0	0	0	0	0	0	0	0	0	0	0	0	0	1	77	0	0	0	0	0	0
4:15143752-15145446	AT4G31150,	7	-	0	0	1	43	0	0	0	0	1	123	0	0	0	0	0	0	0	0	0	0	0	0	0	0	0	0	0	0	0	0	0	0	0	0	2	76
4:15650002-15650722	AT4G32420,	3	-	0	0	0	0	0	0	1	126	0	0	0	0	0	0	0	0	1	29	1	84	0	0	0	0	0	0	0	0	0	0	0	0	1	243	0	0
4:15960557-15960963	AT4G33080,	2	+	0	0	0	0	0	0	0	0	1	152	2	618	0	0	0	0	0	0	0	0	0	0	0	0	0	0	0	0	0	0	1	366	0	0	0	0
4:16045456-16046106	AT4G33270,	2	-	0	0	0	0	0	0	1	149	0	0	1	313	0	0	0	0	0	0	0	0	0	0	0	0	0	0	0	0	2	99	0	0	0	0	0	0
4:16095802-16096629	AT4G33450,	2	-	0	0	0	0	0	0	0	0	0	0	0	0	2	85	2	125	0	0	0	0	0	0	0	0	0	0	0	0	0	0	0	0	0	0	0	0
4:16134561-16134761	AT4G33550,	1	-	0	0	0	0	1	49	0	0	0	0	0	0	1	3795	2	4797	0	0	0	0	0	0	0	0	0	0	0	0	0	0	0	0	0	0	0	0
4:16176666-16176937	AT4G33700,	1	-	0	0	0	0	0	0	0	0	0	0	0	0	1	519	1	802	0	0	1	207	0	0	1	487	0	0	0	0	0	0	0	0	0	0	0	0
4:16338316-16338527	AT4G34110,	2	+	0	0	0	0	0	0	0	0	0	0	0	0	3	3432	1	4423	0	0	0	0	0	0	0	0	0	0	0	0	0	0	0	0	0	0	0	0
4:16534901-16535100	AT4G34620,	1	-	0	0	0	0	1	6315	0	0	0	0	0	0	0	0	1	1395	0	0	0	0	0	0	0	0	0	0	0	0	0	0	0	0	0	0	2	3505
4:16539042-16539721	AT4G34640,	4	+	0	0	0	0	0	0	0	0	0	0	0	0	0	0	0	0	0	0	0	0	0	0	0	0	0	0	0	0	4	345	0	0	0	0	0	0
4:16876236-16877208	AT4G35550,	2	-	0	0	0	0	0	0	0	0	0	0	2	658	0	0	0	0	0	0	0	0	0	0	0	0	0	0	0	0	0	0	0	0	0	0	2	196
4:16931494-16932497	AT4G35730,	5	+	0	0	0	0	0	0	0	0	0	0	1	411	1	356	0	0	0	0	0	0	0	0	1	28	0	0	0	0	0	0	0	0	0	0	1	114
4:16954237-16954705	AT4G35785,	3	-	0	0	0	0	0	0	0	0	0	0	0	0	0	0	1	825	0	0	0	0	0	0	0	0	0	0	0	0	0	0	0	0	2	293	1	261
4:16973183-16973425	AT4G35830,	1	-	0	0	0	0	0	0	1	1236	0	0	0	0	0	0	0	0	0	0	1	1720	0	0	0	0	0	0	0	0	1	824	0	0	1	1106	0	0
4:17474238-17475206	AT4G37080,	3	+	0	0	0	0	0	0	0	0	4	333	0	0	0	0	0	0	0	0	0	0	0	0	0	0	0	0	0	0	0	0	0	0	0	0	0	0
4:17933771-17934117	AT4G38240,	3	-	0	0	0	0	0	0	0	0	0	0	0	0	1	343	1	409	0	0	0	0	0	0	0	0	0	0	0	0	0	0	0	0	0	0	2	173
4:17933917-17934117	AT4G38240,	2	-	0	0	0	0	0	0	0	0	0	0	1	251	2	269	0	0	0	0	0	0	0	0	0	0	0	0	0	0	0	0	0	0	1	125	0	0
4:18091806-18092689	AT4G38760,	4	-	0	0	0	0	0	0	0	0	0	0	0	0	2	293	0	0	0	0	0	0	0	0	0	0	0	0	0	0	0	0	0	0	2	193	0	0
4:18226604-18227396	AT4G39120,	4	-	0	0	0	0	0	0	0	0	1	173	1	285	0	0	2	307	0	0	0	0	0	0	0	0	0	0	0	0	0	0	0	0	0	0	0	0
4:18402042-18402312	AT4G39640,	1	+	0	0	0	0	0	0	1	213	0	0	1	113	0	0	0	0	1	60	0	0	0	0	0	0	0	0	1	106	0	0	0	0	0	0	0	0
4:18520162-18520458	AT4G39940,	1	+	0	0	0	0	0	0	0	0	0	0	0	0	0	0	0	0	0	0	1	472	0	0	3	1383	0	0	0	0	0	0	0	0	0	0	0	0
4:2131906-2132078	AT4G04350,	1	+	1	120	0	0	0	0	0	0	0	0	0	0	0	0	0	0	0	0	0	0	0	0	2	237	0	0	0	0	0	0	1	298	0	0	0	0
4:2385452-2405492	n/a		-	0	0	0	0	0	0	0	0	0	0	0	0	3	129	1	130	0	0	0	0	0	0	0	0	0	0	0	0	0	0	0	0	0	0	0	0
4:2719063-2719234	AT4G05320,	1	+	0	0	0	0	0	0	1	14250	0	0	0	0	1	27372	0	0	0	0	0	0	0	0	0	0	0	0	0	0	0	0	0	0	0	0	2	12644
4:275956-276194	AT4G00660,	1	+	0	0	0	0	0	0	1	229	3	276	0	0	0	0	0	0	0	0	0	0	0	0	0	0	0	0	0	0	0	0	0	0	0	0	0	0
4:5406-5588	AT4G00020,	1	-	0	0	0	0	0	0	0	0	0	0	0	0	0	0	0	0	0	0	0	0	0	0	0	0	0	0	0	0	2	42	0	0	1	52	1	43
4:567721-567858	AT4G01370,	1	+	0	0	0	0	1	384	0	0	0	0	0	0	0	0	0	0	0	0	0	0	0	0	1	369	0	0	0	0	0	0	0	0	2	641	0	0
4:6271585-6271974	AT4G10030,	3	-	0	0	0	0	0	0	0	0	1	107	0	0	0	0	0	0	0	0	0	0	0	0	1	172	1	89	0	0	0	0	0	0	0	0	1	106
4:6632014-6632412	AT4G10770,	1	-	0	0	0	0	0	0	1	150	0	0	0	0	0	0	0	0	0	0	0	0	0	0	0	0	0	0	1	103	0	0	0	0	2	343	0	0
4:677916-678158	AT4G01560,	2	-	0	0	0	0	0	0	0	0	0	0	2	430	0	0	0	0	0	0	0	0	0	0	0	0	0	0	0	0	0	0	1	339	1	217	0	0
4:6982836-6988971	n/a		+	0	0	0	0	0	0	2	10	0	0	0	0	1	56	0	0	0	0	0	0	0	0	1	10	0	0	0	0	0	0	0	0	0	0	0	0
4:7265181-7265437	AT4G12130,	1	+	0	0	0	0	0	0	0	0	0	0	1	82	0	0	0	0	0	0	0	0	0	0	0	0	2	22	0	0	1	62	0	0	0	0	0	0
4:7350411-7352177	AT4G12420,	6	-	0	0	1	1230	0	0	0	0	0	0	0	0	0	0	0	0	0	0	0	0	0	0	0	0	0	0	0	0	0	0	1	1227	2	1047	0	0
4:7685841-7686143	AT4G13250,	2	-	1	309	0	0	1	510	0	0	0	0	0	0	0	0	0	0	0	0	0	0	0	0	0	0	0	0	0	0	0	0	0	0	2	1715	0	0
4:7937483-7938039	AT4G13640,	4	-	0	0	0	0	0	0	0	0	0	0	0	0	1	410	0	0	0	0	0	0	0	0	3	657	0	0	0	0	0	0	0	0	0	0	0	0
4:7947239-7947802	AT4G13660,	2	+	0	0	0	0	0	0	0	0	3	228	1	482	0	0	0	0	0	0	0	0	0	0	0	0	0	0	0	0	0	0	0	0	0	0	0	0
4:8054954-8055201	AT4G13940,	1	-	1	1930	0	0	0	0	0	0	0	0	0	0	0	0	0	0	0	0	0	0	0	0	0	0	0	0	0	0	0	0	0	0	3	7684	0	0
4:8518106-8518275	AT4G14880,	1	-	0	0	0	0	1	2048	0	0	0	0	0	0	0	0	2	2967	0	0	1	1528	0	0	0	0	0	0	0	0	0	0	0	0	0	0	0	0
4:8659209-8659935	AT4G15180,	3	+	0	0	0	0	0	0	0	0	2	135	0	0	0	0	0	0	0	0	0	0	0	0	0	0	0	0	0	0	0	0	0	0	2	150	0	0
4:8660055-8660747	AT4G15180,	3	+	0	0	0	0	1	84	0	0	1	124	1	263	0	0	0	0	0	0	0	0	0	0	0	0	0	0	0	0	0	0	1	175	0	0	0	0
4:8847450-8848715	AT4G15475,	5	+	0	0	0	0	0	0	0	0	0	0	0	0	0	0	1	207	0	0	0	0	0	0	1	106	0	0	0	0	0	0	0	0	0	0	2	112
4:9246007-9246213	AT4G16360,	2	+	1	90	1	197	0	0	0	0	0	0	0	0	1	466	0	0	0	0	0	0	0	0	0	0	0	0	0	0	0	0	1	608	0	0	0	0
4:9262372-9262525	AT4G16400,AT4G16410,	1	+	0	0	2	1508	0	0	0	0	0	0	0	0	0	0	0	0	1	431	1	1054	0	0	0	0	0	0	0	0	0	0	0	0	0	0	0	0
4:9503837-9542475	n/a		-	0	0	0	0	1	151	0	0	0	0	0	0	0	0	0	0	0	0	0	0	0	0	0	0	0	0	0	0	0	0	0	0	1	139	2	159
4:9586703-9587451	AT4G17040,	3	-	0	0	0	0	0	0	0	0	0	0	0	0	0	0	0	0	0	0	0	0	0	0	4	2904	0	0	0	0	0	0	0	0	0	0	0	0
4:9843500-9843750	AT4G17680,	1	-	0	0	0	0	0	0	0	0	0	0	0	0	0	0	0	0	0	0	0	0	0	0	0	0	0	0	0	0	0	0	1	150	2	144	1	137
5:1135538-1136000	AT5G04140,	3	-	0	0	0	0	0	0	0	0	0	0	0	0	0	0	0	0	0	0	0	0	0	0	4	3547	0	0	0	0	0	0	0	0	0	0	0	0
5:1252896-1253134	AT5G04430,	1	-	0	0	1	1013	0	0	2	907	0	0	0	0	0	0	0	0	0	0	0	0	0	0	0	0	0	0	0	0	0	0	0	0	0	0	1	844
5:13463619-13464016	AT5G35200,	3	-	0	0	0	0	0	0	0	0	0	0	0	0	1	852	0	0	0	0	0	0	0	0	1	304	0	0	0	0	1	242	1	515	0	0	0	0
5:14739655-14742921	n/a		-	0	0	0	0	0	0	1	4	0	0	0	0	0	0	0	0	1	0	0	0	0	0	0	0	0	0	0	0	2	16	0	0	0	0	0	0
5:15107899-15131914	n/a		+	0	0	0	0	0	0	0	0	0	0	0	0	0	0	0	0	0	0	0	0	0	0	0	0	0	0	0	0	0	0	0	0	2	20	2	20
5:1532524-1532736	AT5G05170,	2	+	0	0	0	0	0	0	0	0	0	0	0	0	1	3417	1	4502	0	0	0	0	0	0	0	0	0	0	0	0	0	0	1	1798	1	1459	0	0
5:15844634-15844834	AT5G39570,	1	+	0	0	0	0	0	0	0	0	0	0	2	6851	0	0	0	0	0	0	0	0	0	0	2	3681	0	0	0	0	0	0	0	0	0	0	0	0
5:15904906-16053926	n/a		+	1	1416	0	0	0	0	0	0	0	0	1	5749	0	0	1	5008	0	0	0	0	0	0	0	0	0	0	0	0	0	0	0	0	0	0	1	2890
5:16094468-16094842	AT5G40270,	3	-	0	0	0	0	0	0	0	0	2	179	0	0	0	0	1	328	0	0	0	0	0	0	0	0	0	0	0	0	0	0	0	0	1	168	0	0
5:16189274-16190013	AT5G40450,	2	+	0	0	0	0	0	0	0	0	1	628	0	0	1	1493	1	1641	0	0	0	0	0	0	0	0	0	0	0	0	1	150	0	0	0	0	0	0
5:16492957-16496158	n/a		-	0	0	0	0	0	0	1	214	0	0	0	0	0	0	0	0	0	0	0	0	0	0	0	0	0	0	0	0	0	0	0	0	0	0	3	458
5:16544967-16551646	n/a		+	0	0	0	0	0	0	0	0	0	0	0	0	2	435	0	0	0	0	0	0	0	0	0	0	0	0	0	0	0	0	0	0	2	206	0	0
5:16822446-16824040	AT5G42080,	8	-	0	0	0	0	0	0	0	0	0	0	1	2514	1	2214	0	0	0	0	0	0	0	0	0	0	0	0	0	0	0	0	0	0	1	1084	1	1061
5:17544497-17544638	AT5G43680,	1	+	0	0	0	0	0	0	0	0	0	0	2	174	1	183	0	0	0	0	0	0	1	59	0	0	0	0	0	0	0	0	0	0	0	0	0	0
5:17717547-17717691	AT5G44030,	1	+	0	0	0	0	0	0	0	0	0	0	3	1402	0	0	0	0	0	0	0	0	0	0	0	0	0	0	0	0	0	0	0	0	0	0	1	254
5:18090893-18092280	AT5G44800,	3	-	0	0	1	89	0	0	0	0	0	0	1	352	1	322	1	375	0	0	0	0	0	0	0	0	0	0	0	0	0	0	0	0	0	0	0	0
5:18670520-18670788	AT5G46030,	2	+	0	0	0	0	0	0	0	0	0	0	1	1782	0	0	1	1664	0	0	0	0	0	0	0	0	0	0	0	0	0	0	1	1382	0	0	1	765
5:1883117-1883998	AT5G06220,	4	+	0	0	0	0	1	283	0	0	0	0	0	0	1	142	0	0	0	0	1	216	0	0	1	594	0	0	0	0	0	0	0	0	0	0	0	0
5:19271939-19272745	AT5G47500,	3	-	0	0	0	0	0	0	0	0	2	250	0	0	1	389	1	573	0	0	0	0	0	0	0	0	0	0	0	0	0	0	0	0	0	0	0	0
5:19326160-19326446	AT5G47690,	2	+	0	0	0	0	0	0	0	0	0	0	2	1293	0	0	0	0	0	0	2	265	0	0	0	0	0	0	0	0	0	0	0	0	0	0	0	0
5:19344592-19344824	AT5G47760,	2	-	0	0	0	0	0	0	0	0	0	0	2	281	0	0	0	0	0	0	2	82	0	0	0	0	0	0	0	0	0	0	0	0	0	0	0	0
5:19508494-19509083	AT5G48120,	3	-	0	0	0	0	1	80	0	0	0	0	1	193	0	0	2	318	0	0	0	0	0	0	0	0	0	0	0	0	0	0	0	0	0	0	0	0
5:19685159-19685722	AT5G48560,	2	+	0	0	0	0	0	0	0	0	0	0	1	1495	0	0	1	1761	0	0	0	0	0	0	0	0	0	0	0	0	0	0	2	179	0	0	0	0
5:19816023-19816283	AT5G48880,	2	-	0	0	1	173	0	0	1	173	0	0	0	0	0	0	0	0	0	0	0	0	0	0	0	0	0	0	0	0	0	0	1	1220	0	0	1	2271
5:19880181-19880471	AT5G49030,	2	-	0	0	0	0	0	0	0	0	0	0	0	0	0	0	0	0	0	0	0	0	2	120	2	311	0	0	0	0	0	0	0	0	0	0	0	0
5:2031427-2031768	AT5G06610,	1	+	0	0	0	0	0	0	0	0	0	0	0	0	0	0	1	166	0	0	0	0	1	21	0	0	0	0	0	0	0	0	0	0	1	100	1	87
5:20477146-20477609	AT5G50310,	3	+	0	0	0	0	0	0	1	94	2	156	0	0	0	0	0	0	0	0	0	0	0	0	0	0	0	0	0	0	0	0	0	0	1	137	0	0
5:21070318-21070530	AT5G51830,	1	+	0	0	0	0	0	0	0	0	0	0	0	0	1	445	0	0	0	0	0	0	0	0	0	0	0	0	0	0	0	0	0	0	3	384	0	0
5:21355792-21356203	AT5G52650,	2	-	0	0	0	0	0	0	0	0	0	0	2	3172	1	2892	0	0	0	0	0	0	0	0	0	0	0	0	0	0	0	0	0	0	0	0	1	2437
5:2141179-2141654	AT5G06910,	3	+	0	0	0	0	1	109	1	111	0	0	0	0	0	0	1	275	0	0	0	0	0	0	0	0	0	0	0	0	0	0	0	0	0	0	1	162
5:22026665-22027282	AT5G54250,	3	-	0	0	0	0	0	0	0	0	0	0	0	0	0	0	0	0	1	92	2	200	0	0	0	0	0	0	0	0	0	0	0	0	1	366	0	0
5:22348825-22348991	AT5G55070,	2	+	0	0	0	0	0	0	0	0	0	0	0	0	0	0	0	0	0	0	1	195	0	0	0	0	0	0	0	0	0	0	2	713	0	0	1	599
5:23072415-23073129	AT5G57015,	5	+	0	0	0	0	0	0	2	151	1	251	0	0	0	0	0	0	0	0	0	0	0	0	0	0	0	0	0	0	0	0	0	0	1	341	0	0
5:2320609-2320986	AT5G07350,	1	-	0	0	0	0	0	0	0	0	0	0	0	0	0	0	0	0	0	0	0	0	0	0	0	0	0	0	3	216	1	455	0	0	0	0	0	0
5:23904700-23905323	AT5G59250,	4	+	0	0	0	0	0	0	2	375	1	30	0	0	0	0	0	0	0	0	0	0	0	0	0	0	0	0	0	0	0	0	0	0	1	299	0	0
5:24228172-24229195	AT5G60170,	5	+	0	0	1	179	0	0	0	0	0	0	1	373	1	553	0	0	0	0	0	0	0	0	0	0	0	0	0	0	0	0	0	0	1	433	0	0
5:24965050-24966443	AT5G62165,	2	+	0	0	0	0	0	0	0	0	1	534	1	747	0	0	0	0	0	0	0	0	0	0	0	0	0	0	0	0	0	0	0	0	2	330	0	0
5:25076111-25076494	AT5G62460,	2	+	0	0	0	0	0	0	0	0	0	0	0	0	0	0	0	0	0	0	0	0	0	0	4	362	0	0	0	0	0	0	0	0	0	0	0	0
5:25564225-25564624	AT5G63880,	2	+	0	0	0	0	0	0	0	0	1	318	1	566	0	0	2	490	0	0	0	0	0	0	0	0	0	0	0	0	0	0	0	0	0	0	0	0
5:25687164-25687521	AT5G64220,	2	+	3	34	0	0	0	0	0	0	0	0	0	0	0	0	1	468	0	0	0	0	0	0	0	0	0	0	0	0	0	0	0	0	0	0	0	0
5:26149884-26150030	AT5G65430,	1	-	0	0	0	0	1	1891	0	0	0	0	0	0	0	0	2	3993	0	0	0	0	0	0	0	0	0	0	0	0	0	0	1	1665	0	0	0	0
5:26568800-26568967	AT5G66570,	1	-	0	0	1	17742	1	32340	0	0	0	0	0	0	0	0	0	0	2	10443	0	0	0	0	0	0	0	0	0	0	0	0	0	0	0	0	0	0
5:26587427-26601316	n/a		+	0	0	3	12	0	0	0	0	0	0	1	16	0	0	0	0	0	0	0	0	0	0	0	0	0	0	0	0	0	0	0	0	0	0	0	0
5:26913483-26914773	AT5G67440,	1	-	0	0	1	117	0	0	1	116	1	111	0	0	0	0	0	0	0	0	0	0	0	0	0	0	0	0	0	0	0	0	1	144	0	0	0	0
5:2993978-2994285	AT5G09660,	2	-	0	0	0	0	0	0	0	0	0	0	0	0	0	0	0	0	0	0	2	4614	0	0	0	0	2	5785	0	0	0	0	0	0	0	0	0	0
5:3014929-3015118	AT5G09730,	1	-	0	0	0	0	0	0	0	0	1	37069	0	0	0	0	1	131250	0	0	0	0	0	0	0	0	0	0	0	0	0	0	1	30516	1	103965	0	0
5:3073820-3074015	AT5G09870,	1	+	0	0	0	0	0	0	0	0	0	0	0	0	0	0	0	0	0	0	0	0	0	0	0	0	0	0	0	0	1	404	1	859	1	917	1	819
5:3076265-3076529	AT5G09870,	1	+	0	0	0	0	0	0	0	0	0	0	0	0	0	0	0	0	0	0	0	0	1	171	0	0	1	277	0	0	2	268	0	0	0	0	0	0
5:3128212-3128349	AT5G10010,	1	+	0	0	0	0	0	0	0	0	0	0	4	875	0	0	0	0	0	0	0	0	0	0	0	0	0	0	0	0	0	0	0	0	0	0	0	0
5:3150823-3153270	AT5G10080,	9	+	0	0	1	45	0	0	0	0	1	147	2	267	0	0	0	0	0	0	0	0	0	0	0	0	0	0	0	0	0	0	0	0	0	0	0	0
5:359784-360446	AT5G01920,	2	+	0	0	0	0	0	0	2	337	0	0	0	0	0	0	0	0	0	0	0	0	0	0	1	601	0	0	0	0	0	0	1	218	0	0	0	0
5:3778321-3778967	AT5G11720,	1	+	0	0	1	177	0	0	0	0	0	0	0	0	0	0	0	0	0	0	0	0	0	0	1	411	0	0	0	0	0	0	2	251	0	0	0	0
5:3954126-3955343	AT5G12230,	4	-	0	0	0	0	0	0	0	0	0	0	3	563	0	0	0	0	0	0	0	0	0	0	0	0	0	0	0	0	0	0	1	273	0	0	0	0
5:4177480-4178479	AT5G13160,	2	+	0	0	0	0	0	0	0	0	0	0	1	222	0	0	2	334	0	0	0	0	0	0	0	0	0	0	0	0	0	0	0	0	1	246	0	0
5:4537775-4538262	AT5G14060,	3	+	1	241	0	0	0	0	0	0	0	0	0	0	0	0	0	0	1	180	0	0	0	0	2	634	0	0	0	0	0	0	0	0	0	0	0	0
5:5035205-5035512	AT5G15510,	2	+	0	0	0	0	0	0	0	0	1	200	2	423	0	0	1	306	0	0	0	0	0	0	0	0	0	0	0	0	0	0	0	0	0	0	0	0
5:5052830-5053040	AT5G15540,	1	-	0	0	0	0	0	0	0	0	1	125	0	0	0	0	1	331	0	0	0	0	0	0	0	0	1	40	0	0	0	0	1	163	0	0	0	0
5:5159266-5159793	AT5G15810,	3	+	0	0	0	0	0	0	0	0	0	0	0	0	3	412	0	0	0	0	0	0	0	0	0	0	0	0	0	0	0	0	0	0	1	216	0	0
5:548015-548158	AT5G02480,	1	+	0	0	0	0	1	415	0	0	0	0	0	0	1	1140	0	0	0	0	1	396	0	0	0	0	0	0	0	0	0	0	0	0	0	0	1	424
5:554221-554387	AT5G02500,	1	-	0	0	0	0	0	0	0	0	0	0	1	28852	0	0	0	0	0	0	0	0	0	0	0	0	0	0	0	0	2	8894	0	0	0	0	1	14594
5:5552859-5554063	AT5G16890,	5	+	0	0	0	0	0	0	0	0	0	0	0	0	0	0	0	0	0	0	0	0	0	0	0	0	0	0	1	28	0	0	1	73	2	61	0	0
5:555426-555674	AT5G02500,	1	-	1	2913	0	0	1	5257	0	0	0	0	0	0	1	18499	1	23456	0	0	0	0	0	0	0	0	0	0	0	0	0	0	0	0	0	0	0	0
5:5595534-5595823	AT5G17020,	2	+	0	0	0	0	0	0	0	0	0	0	0	0	0	0	0	0	0	0	1	91	2	55	0	0	0	0	0	0	0	0	0	0	0	0	1	352
5:5750270-5750776	AT5G17440,	3	+	0	0	1	91	1	106	0	0	0	0	1	372	0	0	0	0	0	0	0	0	0	0	0	0	0	0	0	0	0	0	1	226	0	0	0	0
5:6180403-6180926	AT5G18590,	3	-	0	0	0	0	0	0	1	250	0	0	0	0	0	0	0	0	0	0	0	0	0	0	0	0	0	0	1	123	0	0	0	0	1	198	1	159
5:6194178-6194569	AT5G18610,	1	+	0	0	0	0	0	0	0	0	0	0	1	221	0	0	1	257	0	0	0	0	0	0	0	0	0	0	0	0	0	0	0	0	1	85	1	96
5:6524750-6525754	AT5G19370,	4	-	0	0	0	0	0	0	1	336	1	175	0	0	0	0	1	405	0	0	0	0	0	0	0	0	0	0	0	0	0	0	0	0	0	0	1	399
5:6699296-6699579	AT5G19820,	2	-	0	0	0	0	0	0	0	0	0	0	0	0	1	727	0	0	1	39	0	0	0	0	1	246	0	0	0	0	0	0	0	0	1	411	0	0
5:6910674-6912811	AT5G20450,	7	-	1	20	0	0	0	0	0	0	1	53	0	0	0	0	0	0	0	0	0	0	0	0	0	0	0	0	0	0	0	0	0	0	2	43	0	0
5:6919631-6930666	n/a		-	0	0	0	0	2	111	0	0	0	0	0	0	2	378	0	0	0	0	0	0	0	0	0	0	0	0	0	0	0	0	0	0	0	0	0	0
5:7016181-7016333	AT5G20720,	1	+	1	2375	0	0	0	0	0	0	0	0	0	0	0	0	0	0	0	0	0	0	0	0	0	0	0	0	0	0	0	0	3	4281	0	0	0	0
5:7210205-7211826	AT5G21222,	6	+	0	0	0	0	0	0	0	0	0	0	0	0	0	0	0	0	0	0	1	166	0	0	1	349	0	0	0	0	0	0	0	0	2	162	0	0
5:7535138-7535404	AT5G22650,	2	+	0	0	1	1430	0	0	0	0	0	0	2	3566	0	0	1	3008	0	0	0	0	0	0	0	0	0	0	0	0	0	0	0	0	0	0	0	0
5:7705423-7720521	n/a		+	0	0	0	0	2	844	0	0	0	0	0	0	0	0	0	0	0	0	0	0	0	0	2	4633	0	0	0	0	0	0	0	0	0	0	0	0
5:8282404-8282698	AT5G24318,	1	-	1	1	0	0	0	0	0	0	0	0	0	0	0	0	0	0	0	0	1	9	0	0	0	0	0	0	0	0	0	0	1	23	1	26	0	0
5:8429697-8430069	n/a		+	0	0	0	0	1	205	0	0	0	0	2	802	0	0	0	0	0	0	0	0	0	0	0	0	0	0	0	0	0	0	0	0	1	223	0	0
5:8429697-8430431	n/a		+	0	0	0	0	0	0	0	0	0	0	0	0	2	787	0	0	0	0	1	212	0	0	0	0	0	0	0	0	0	0	0	0	1	186	0	0
5:851157-851405	AT5G03430,	2	-	0	0	0	0	0	0	0	0	0	0	1	330	0	0	0	0	0	0	1	249	0	0	0	0	0	0	0	0	0	0	2	279	0	0	0	0
5:8647323-8647687	AT5G25090,	2	-	0	0	0	0	0	0	0	0	0	0	0	0	1	716	0	0	0	0	0	0	0	0	0	0	0	0	0	0	1	137	0	0	0	0	2	237
5:891506-891934	AT5G03540,	2	+	0	0	0	0	0	0	0	0	0	0	3	784	0	0	1	849	0	0	0	0	0	0	0	0	0	0	0	0	0	0	0	0	0	0	0	0
5:8915372-8915512	AT5G25610,	1	-	0	0	0	0	0	0	0	0	0	0	0	0	0	0	0	0	0	0	0	0	0	0	0	0	0	0	0	0	0	0	2	5988	2	5556	0	0
5:9201027-9209184	n/a		+	0	0	0	0	0	0	0	0	0	0	0	0	4	1430	0	0	0	0	0	0	0	0	0	0	0	0	0	0	0	0	0	0	0	0	0	0
5:935687-936321	AT5G03650,	3	+	0	0	1	442	1	394	0	0	0	0	1	195	0	0	0	0	0	0	0	0	0	0	0	0	0	0	0	0	0	0	1	450	0	0	0	0
5:9489755-9490220	AT5G26980,	2	-	0	0	0	0	0	0	0	0	2	243	1	416	0	0	0	0	0	0	1	39	0	0	0	0	0	0	0	0	0	0	0	0	0	0	0	0
5:9723999-9725177	AT5G27540,	5	+	0	0	0	0	0	0	0	0	0	0	0	0	1	678	2	800	0	0	0	0	0	0	0	0	0	0	0	0	1	260	0	0	0	0	0	0
Mt:22532-22695	n/a		-	0	0	0	0	0	0	0	0	1	3130	0	0	1	8033	1	9721	0	0	0	0	0	0	0	0	0	0	0	0	1	1772	0	0	0	0	0	0
Mt:351440-351623	n/a		-	0	0	0	0	0	0	0	0	0	0	0	0	0	0	4	24771	0	0	0	0	0	0	0	0	0	0	0	0	0	0	0	0	0	0	0	0
Pt:1114-1387	ATCG00020,	1	+	0	0	0	0	0	0	0	0	0	0	0	0	0	0	0	0	0	0	0	0	0	0	0	0	0	0	0	0	0	0	0	0	4	1909626	0	0
Pt:12765-12903	n/a		-	0	0	0	0	0	0	3	56543	0	0	0	0	0	0	1	3722	0	0	0	0	0	0	0	0	0	0	0	0	0	0	0	0	0	0	0	0
Pt:1326-119713	n/a		+	0	0	4	1729075	0	0	0	0	0	0	0	0	0	0	0	0	0	0	0	0	0	0	0	0	0	0	0	0	0	0	0	0	0	0	0	0
Pt:20974-21131	ATCG00180,	1	+	0	0	0	0	0	0	0	0	0	0	0	0	0	0	1	1401	0	0	1	4956	0	0	0	0	0	0	0	0	1	1985	0	0	1	3412	0	0
Pt:34283-34518	ATCG00280,	1	-	0	0	0	0	0	0	0	0	0	0	0	0	0	0	0	0	0	0	0	0	0	0	0	0	0	0	0	0	0	0	4	70879	0	0	0	0
Pt:41530-41713	ATCG00350,	1	+	0	0	0	0	0	0	0	0	0	0	0	0	0	0	0	0	0	0	1	170409	0	0	0	0	0	0	0	0	0	0	0	0	3	72905	0	0
Pt:41545-41713	ATCG00350,	1	+	0	0	1	149024	0	0	0	0	0	0	0	0	0	0	0	0	0	0	0	0	0	0	3	333129	0	0	0	0	0	0	0	0	0	0	0	0
Pt:46956-47139	ATCG00400,	0	-	0	0	0	0	4	136487	0	0	0	0	0	0	0	0	0	0	0	0	0	0	0	0	0	0	0	0	0	0	0	0	0	0	0	0	0	0
Pt:47924-48184	n/a		-	0	0	4	60541	0	0	0	0	0	0	0	0	0	0	0	0	0	0	0	0	0	0	0	0	0	0	0	0	0	0	0	0	0	0	0	0
Pt:48001-48192	n/a		+	0	0	0	0	0	0	0	0	0	0	0	0	0	0	0	0	0	0	2	31046	0	0	0	0	0	0	0	0	0	0	2	39901	0	0	0	0
Pt:55655-121646	n/a		+	0	0	3	1062846	0	0	0	0	0	0	0	0	0	0	0	0	1	281293	0	0	0	0	0	0	0	0	0	0	0	0	0	0	0	0	0	0
Pt:557-1248	ATCG00020,	1	+	0	0	0	0	0	0	4	7384539	0	0	0	0	0	0	0	0	0	0	0	0	0	0	0	0	0	0	0	0	0	0	0	0	0	0	0	0
Pt:65954-66139	n/a		-	0	0	0	0	0	0	3	27250	0	0	0	0	0	0	0	0	1	5572	0	0	0	0	0	0	0	0	0	0	0	0	0	0	0	0	0	0
Pt:71042-71276	ATCG00670,	0	-	0	0	0	0	0	0	0	0	0	0	0	0	0	0	0	0	0	0	3	7097	0	0	0	0	0	0	0	0	0	0	1	7929	0	0	0	0
Pt:72546-72715	ATCG00680,	1	+	0	0	0	0	1	126386	2	140639	0	0	0	0	0	0	0	0	0	0	0	0	0	0	1	302850	0	0	0	0	0	0	0	0	0	0	0	0
Pt:739-104018	n/a		-	0	0	0	0	0	0	0	0	0	0	0	0	0	0	0	0	0	0	0	0	0	0	4	5909471	0	0	0	0	0	0	0	0	0	0	0	0
Pt:73949-74538	n/a		+	0	0	0	0	0	0	0	0	0	0	0	0	0	0	0	0	0	0	4	177113	0	0	0	0	0	0	0	0	0	0	0	0	0	0	0	0
Pt:83695-83958	n/a		-	0	0	0	0	1	10700	1	13215	0	0	0	0	2	4185	0	0	0	0	0	0	0	0	0	0	0	0	0	0	0	0	0	0	0	0	0	0
1:10075640-10075858	AT1G28670,	1	-	0	0	0	0	1	380	2	372	0	0	0	0	0	0	0	0	0	0	0	0	0	0	0	0	0	0	0	0	0	0	0	0	0	0	0	0
1:10097934-10100152	AT1G28715,	4	-	0	0	0	0	0	0	0	0	0	0	0	0	1	62	1	76	0	0	0	0	1	9	0	0	0	0	0	0	0	0	0	0	0	0	0	0
1:10097934-10101935	AT1G28715,	6	-	0	0	0	0	0	0	0	0	1	41	1	74	0	0	0	0	0	0	0	0	0	0	0	0	1	26	0	0	0	0	0	0	0	0	0	0
1:10293054-10293493	AT1G29400,	1	-	0	0	0	0	0	0	0	0	0	0	1	1806	0	0	2	1872	0	0	0	0	0	0	0	0	0	0	0	0	0	0	0	0	0	0	0	0
1:10478382-10478706	AT1G29930,	1	+	0	0	0	0	3	171148	0	0	0	0	0	0	0	0	0	0	0	0	0	0	0	0	0	0	0	0	0	0	0	0	0	0	0	0	0	0
1:10832906-10834059	AT1G30580,	5	-	0	0	1	1398	0	0	1	872	0	0	1	4050	0	0	0	0	0	0	0	0	0	0	0	0	0	0	0	0	0	0	0	0	0	0	0	0
1:10888650-10888856	AT1G30690,	1	+	0	0	0	0	0	0	0	0	0	0	3	3070	0	0	0	0	0	0	0	0	0	0	0	0	0	0	0	0	0	0	0	0	0	0	0	0
1:11143851-11144015	AT1G31180,	1	-	0	0	0	0	2	433	1	437	0	0	0	0	0	0	0	0	0	0	0	0	0	0	0	0	0	0	0	0	0	0	0	0	0	0	0	0
1:11162860-11163003	AT1G31230,	1	-	0	0	0	0	0	0	0	0	0	0	0	0	1	413	0	0	1	63	0	0	0	0	0	0	0	0	0	0	0	0	0	0	1	285	0	0
1:11326903-11327253	AT1G31650,	1	-	0	0	0	0	0	0	0	0	0	0	0	0	0	0	0	0	0	0	1	103	0	0	0	0	2	80	0	0	0	0	0	0	0	0	0	0
1:11331936-11332699	AT1G31660,	4	-	0	0	0	0	0	0	0	0	1	208	0	0	0	0	0	0	0	0	0	0	0	0	2	105	0	0	0	0	0	0	0	0	0	0	0	0
1:11532779-11532923	AT1G32060,	1	-	0	0	1	6721	0	0	0	0	0	0	0	0	0	0	0	0	0	0	1	5628	1	5618	0	0	0	0	0	0	0	0	0	0	0	0	0	0
1:11581668-11583863	n/a		-	0	0	0	0	0	0	0	0	0	0	0	0	1	21	0	0	0	0	0	0	0	0	0	0	0	0	0	0	0	0	1	6	0	0	1	8
1:11665608-11665767	AT1G32340,	1	-	0	0	0	0	0	0	0	0	0	0	1	418	0	0	0	0	0	0	1	101	0	0	0	0	0	0	0	0	0	0	0	0	1	172	0	0
1:11749083-11749593	AT1G32490,	3	+	0	0	0	0	0	0	0	0	3	214	0	0	0	0	0	0	0	0	0	0	0	0	0	0	0	0	0	0	0	0	0	0	0	0	0	0
1:1190590-1190842	AT1G04410,	2	+	0	0	0	0	3	4902	0	0	0	0	0	0	0	0	0	0	0	0	0	0	0	0	0	0	0	0	0	0	0	0	0	0	0	0	0	0
1:12011535-12012208	AT1G33120,	2	+	0	0	0	0	0	0	0	0	0	0	0	0	3	7051	0	0	0	0	0	0	0	0	0	0	0	0	0	0	0	0	0	0	0	0	0	0
1:12195566-12196544	AT1G33615,	3	-	0	0	0	0	0	0	0	0	1	105	1	173	0	0	1	124	0	0	0	0	0	0	0	0	0	0	0	0	0	0	0	0	0	0	0	0
1:12195716-12195994	AT1G33615,	2	-	0	0	0	0	0	0	0	0	1	146	2	315	0	0	0	0	0	0	0	0	0	0	0	0	0	0	0	0	0	0	0	0	0	0	0	0
1:12196286-12196544	AT1G33615,	1	-	0	0	0	0	0	0	0	0	2	89	0	0	1	115	0	0	0	0	0	0	0	0	0	0	0	0	0	0	0	0	0	0	0	0	0	0
1:12197021-12197575	n/a		-	0	0	0	0	0	0	0	0	1	122	2	142	0	0	0	0	0	0	0	0	0	0	0	0	0	0	0	0	0	0	0	0	0	0	0	0
1:1227580-1228167	AT1G04510,	3	+	0	0	0	0	2	200	0	0	0	0	0	0	0	0	0	0	0	0	1	95	0	0	0	0	0	0	0	0	0	0	0	0	0	0	0	0
1:12350714-12350970	AT1G33970,	1	-	0	0	1	222	0	0	0	0	0	0	0	0	0	0	0	0	0	0	0	0	0	0	0	0	1	135	0	0	1	131	0	0	0	0	0	0
1:12974193-12974552	n/a		-	0	0	0	0	0	0	0	0	0	0	2	33	0	0	1	42	0	0	0	0	0	0	0	0	0	0	0	0	0	0	0	0	0	0	0	0
1:13209402-13210000	AT1G35680,	3	+	0	0	0	0	1	3488	0	0	0	0	0	0	0	0	0	0	0	0	1	2081	0	0	0	0	0	0	0	0	0	0	0	0	1	2332	0	0
1:13540458-13540810	AT1G36160,	1	+	0	0	0	0	0	0	0	0	0	0	0	0	0	0	1	510	0	0	0	0	0	0	0	0	0	0	0	0	0	0	0	0	2	666	0	0
1:1356459-1356677	AT1G04820,	1	-	0	0	0	0	0	0	0	0	0	0	0	0	1	7171	0	0	0	0	0	0	0	0	2	1991	0	0	0	0	0	0	0	0	0	0	0	0
1:14160333-14160909	AT1G37130,	1	-	0	0	0	0	0	0	0	0	0	0	0	0	2	2227	1	2723	0	0	0	0	0	0	0	0	0	0	0	0	0	0	0	0	0	0	0	0
1:14160752-14160909	AT1G37130,	1	-	0	0	0	0	0	0	0	0	1	588	0	0	0	0	0	0	0	0	0	0	0	0	2	2711	0	0	0	0	0	0	0	0	0	0	0	0
1:1432292-1432518	AT1G05010,	1	-	0	0	0	0	0	0	0	0	0	0	0	0	0	0	3	1224	0	0	0	0	0	0	0	0	0	0	0	0	0	0	0	0	0	0	0	0
1:1473671-1474375	AT1G05120,	4	-	0	0	0	0	0	0	0	0	0	0	0	0	0	0	2	292	0	0	0	0	0	0	0	0	0	0	1	46	0	0	0	0	0	0	0	0
1:1516587-1517057	AT1G05230,	2	-	0	0	0	0	0	0	2	79	0	0	0	0	0	0	0	0	0	0	0	0	0	0	0	0	0	0	0	0	0	0	1	102	0	0	0	0
1:15604814-15605159	AT1G41830,	1	-	0	0	0	0	0	0	0	0	0	0	0	0	0	0	0	0	0	0	0	0	1	148	0	0	0	0	1	367	0	0	0	0	1	639	0	0
1:15898833-15899338	AT1G42440,	3	-	0	0	0	0	0	0	0	0	2	165	0	0	0	0	0	0	0	0	0	0	0	0	0	0	0	0	0	0	0	0	1	223	0	0	0	0
1:15931678-15932250	AT1G42470,	3	+	1	29	0	0	0	0	0	0	0	0	0	0	1	363	1	429	0	0	0	0	0	0	0	0	0	0	0	0	0	0	0	0	0	0	0	0
1:16128006-16128190	AT1G42970,	2	-	0	0	0	0	3	9635	0	0	0	0	0	0	0	0	0	0	0	0	0	0	0	0	0	0	0	0	0	0	0	0	0	0	0	0	0	0
1:16128153-16128844	AT1G42970,	4	+	0	0	0	0	0	0	1	8728	0	0	0	0	0	0	0	0	0	0	0	0	0	0	0	0	0	0	1	12644	0	0	1	6168	0	0	0	0
1:1625055-1625818	AT1G05500,	4	+	0	0	0	0	0	0	0	0	0	0	1	373	2	351	0	0	0	0	0	0	0	0	0	0	0	0	0	0	0	0	0	0	0	0	0	0
1:16268100-16268268	AT1G43170,	1	+	0	0	0	0	0	0	0	0	3	5794	0	0	0	0	0	0	0	0	0	0	0	0	0	0	0	0	0	0	0	0	0	0	0	0	0	0
1:16487300-16487495	AT1G43710,	2	-	1	132	0	0	0	0	1	216	0	0	0	0	0	0	1	566	0	0	0	0	0	0	0	0	0	0	0	0	0	0	0	0	0	0	0	0
1:17180021-17180439	AT1G45474,	2	+	0	0	1	1070	0	0	0	0	0	0	0	0	0	0	0	0	1	276	0	0	0	0	0	0	0	0	0	0	0	0	0	0	1	953	0	0
1:17395694-17395830	AT1G47420,	1	-	0	0	0	0	0	0	0	0	0	0	0	0	0	0	3	1540	0	0	0	0	0	0	0	0	0	0	0	0	0	0	0	0	0	0	0	0
1:17732530-17735229	AT1G48090,	8	-	0	0	0	0	0	0	0	0	0	0	0	0	0	0	0	0	0	0	0	0	0	0	0	0	0	0	0	0	0	0	0	0	3	297	0	0
1:17809198-17811378	AT1G48240,	9	-	1	99	0	0	0	0	0	0	2	278	0	0	0	0	0	0	0	0	0	0	0	0	0	0	0	0	0	0	0	0	0	0	0	0	0	0
1:17890735-17890884	AT1G48410,	1	-	0	0	0	0	0	0	0	0	0	0	1	1251	0	0	0	0	0	0	0	0	0	0	0	0	0	0	0	0	0	0	0	0	2	642	0	0
1:17940124-17940282	AT1G48520,	1	+	0	0	0	0	1	181	1	246	0	0	0	0	0	0	0	0	0	0	0	0	0	0	0	0	0	0	0	0	0	0	0	0	1	188	0	0
1:17949042-17949676	AT1G48540,	4	+	0	0	0	0	0	0	0	0	0	0	0	0	1	248	0	0	2	35	0	0	0	0	0	0	0	0	0	0	0	0	0	0	0	0	0	0
1:18098657-18099455	AT1G48920,	4	+	0	0	0	0	0	0	0	0	0	0	0	0	0	0	2	3990	0	0	0	0	0	0	0	0	0	0	1	625	0	0	0	0	0	0	0	0
1:1813386-1815085	AT1G05960,	7	-	0	0	0	0	0	0	0	0	0	0	0	0	0	0	0	0	0	0	1	88	0	0	0	0	1	120	0	0	0	0	0	0	0	0	1	268
1:18186425-18186674	AT1G49180,	2	-	0	0	0	0	0	0	0	0	0	0	0	0	0	0	0	0	0	0	0	0	0	0	0	0	3	35	0	0	0	0	0	0	0	0	0	0
1:18202013-18207860	n/a		-	0	0	0	0	0	0	0	0	0	0	0	0	0	0	0	0	0	0	0	0	0	0	0	0	0	0	0	0	0	0	2	18	1	17	0	0
1:18314560-18315622	AT1G49480,	3	-	0	0	0	0	0	0	0	0	1	563	0	0	1	660	0	0	0	0	0	0	0	0	0	0	0	0	0	0	0	0	1	504	0	0	0	0
1:18382886-18383537	AT1G49670,	4	-	0	0	0	0	0	0	0	0	0	0	0	0	1	362	0	0	0	0	0	0	0	0	0	0	0	0	1	139	0	0	1	302	0	0	0	0
1:18639143-18639499	AT1G50320,	1	+	0	0	0	0	0	0	0	0	0	0	0	0	0	0	0	0	0	0	0	0	0	0	3	968	0	0	0	0	0	0	0	0	0	0	0	0
1:19123619-19123780	AT1G51570,	1	-	0	0	0	0	0	0	0	0	0	0	0	0	0	0	0	0	0	0	0	0	0	0	3	921	0	0	0	0	0	0	0	0	0	0	0	0
1:19184117-19184651	AT1G51720,	3	+	0	0	0	0	0	0	0	0	0	0	0	0	0	0	2	211	0	0	1	82	0	0	0	0	0	0	0	0	0	0	0	0	0	0	0	0
1:19369704-19370079	AT1G52080,	2	+	0	0	0	0	1	16	0	0	0	0	0	0	1	118	0	0	0	0	0	0	0	0	0	0	0	0	0	0	1	71	0	0	0	0	0	0
1:19410139-19410908	AT1G52150,	3	-	0	0	0	0	0	0	0	0	1	710	0	0	0	0	1	1458	0	0	0	0	0	0	0	0	0	0	0	0	0	0	0	0	1	190	0	0
1:19410583-19410911	AT1G52150,	1	-	0	0	0	0	0	0	0	0	0	0	0	0	1	1112	0	0	0	0	0	0	0	0	0	0	0	0	0	0	1	172	0	0	1	193	0	0
1:1948429-1949141	AT1G06390,	4	+	0	0	0	0	0	0	1	375	0	0	0	0	0	0	0	0	0	0	0	0	0	0	0	0	0	0	0	0	0	0	0	0	1	636	1	544
1:19522712-19523228	AT1G52410,	4	+	0	0	0	0	0	0	0	0	0	0	3	1644	0	0	0	0	0	0	0	0	0	0	0	0	0	0	0	0	0	0	0	0	0	0	0	0
1:19523024-19523228	AT1G52410,	2	+	0	0	0	0	0	0	0	0	0	0	0	0	0	0	0	0	0	0	0	0	0	0	0	0	0	0	0	0	0	0	3	888	0	0	0	0
1:19523169-19523357	AT1G52410,	2	+	0	0	0	0	0	0	0	0	0	0	0	0	0	0	1	962	0	0	0	0	0	0	0	0	0	0	0	0	0	0	2	889	0	0	0	0
1:19832162-19832370	AT1G53180,	1	+	0	0	0	0	0	0	0	0	0	0	1	544	0	0	0	0	0	0	0	0	0	0	0	0	0	0	0	0	0	0	2	189	0	0	0	0
1:19845984-19846165	AT1G53210,	1	+	0	0	0	0	0	0	0	0	0	0	0	0	1	3037	2	3836	0	0	0	0	0	0	0	0	0	0	0	0	0	0	0	0	0	0	0	0
1:19948157-19948699	AT1G53440,	4	+	0	0	1	191	1	200	0	0	0	0	0	0	0	0	1	1074	0	0	0	0	0	0	0	0	0	0	0	0	0	0	0	0	0	0	0	0
1:19997446-19997759	AT1G53590,	2	+	0	0	0	0	0	0	0	0	0	0	0	0	1	318	0	0	1	23	0	0	0	0	0	0	0	0	0	0	0	0	1	171	0	0	0	0
1:20062464-20063155	AT1G53730,	5	+	0	0	0	0	0	0	0	0	0	0	0	0	1	473	0	0	0	0	0	0	0	0	0	0	1	139	1	103	0	0	0	0	0	0	0	0
1:20063084-20063833	AT1G53730,	4	+	0	0	0	0	1	396	0	0	0	0	0	0	1	547	0	0	0	0	0	0	0	0	0	0	0	0	0	0	0	0	1	197	0	0	0	0
1:20067461-20075679	n/a		-	0	0	0	0	0	0	0	0	0	0	0	0	0	0	0	0	0	0	0	0	0	0	0	0	0	0	0	0	0	0	0	0	0	0	3	947
1:20185195-20186343	AT1G54080,	7	-	0	0	0	0	0	0	0	0	0	0	0	0	3	2719	0	0	0	0	0	0	0	0	0	0	0	0	0	0	0	0	0	0	0	0	0	0
1:20291302-20291595	AT1G54360,	2	+	0	0	0	0	0	0	0	0	0	0	1	307	1	343	0	0	0	0	1	65	0	0	0	0	0	0	0	0	0	0	0	0	0	0	0	0
1:20309945-20310520	AT1G54410,	2	-	0	0	0	0	0	0	0	0	0	0	3	92643	0	0	0	0	0	0	0	0	0	0	0	0	0	0	0	0	0	0	0	0	0	0	0	0
1:20309945-20310552	AT1G54410,	2	-	0	0	0	0	0	0	0	0	0	0	0	0	3	29817	0	0	0	0	0	0	0	0	0	0	0	0	0	0	0	0	0	0	0	0	0	0
1:20656563-20657343	AT1G55350,	2	-	0	0	2	113	1	68	0	0	0	0	0	0	0	0	0	0	0	0	0	0	0	0	0	0	0	0	0	0	0	0	0	0	0	0	0	0
1:2069358-2069678	AT1G06730,	2	+	0	0	0	0	0	0	0	0	0	0	0	0	0	0	1	111	2	5	0	0	0	0	0	0	0	0	0	0	0	0	0	0	0	0	0	0
1:20724108-20724717	AT1G55510,	4	+	0	0	0	0	0	0	0	0	2	150	0	0	0	0	0	0	0	0	0	0	0	0	0	0	0	0	0	0	0	0	0	0	0	0	1	170
1:20877789-20878001	AT1G55850,	1	+	0	0	0	0	0	0	0	0	0	0	2	345	0	0	0	0	0	0	0	0	0	0	0	0	0	0	0	0	0	0	0	0	1	95	0	0
1:21044423-21044592	AT1G56220,	1	+	0	0	0	0	0	0	0	0	2	6006	1	11307	0	0	0	0	0	0	0	0	0	0	0	0	0	0	0	0	0	0	0	0	0	0	0	0
1:21073587-21073793	AT1G56280,	1	-	0	0	0	0	1	2863	0	0	0	0	0	0	0	0	1	12077	0	0	1	3922	0	0	0	0	0	0	0	0	0	0	0	0	0	0	0	0
1:21208697-21209274	AT1G56600,	2	-	0	0	0	0	0	0	0	0	0	0	0	0	1	297	2	376	0	0	0	0	0	0	0	0	0	0	0	0	0	0	0	0	0	0	0	0
1:21415258-21416144	AT1G57820,	5	-	0	0	0	0	0	0	0	0	0	0	1	341	0	0	0	0	0	0	0	0	0	0	0	0	0	0	0	0	2	105	0	0	0	0	0	0
1:21415795-21416144	AT1G57820,	2	-	0	0	1	176	0	0	0	0	1	160	0	0	1	160	0	0	0	0	0	0	0	0	0	0	0	0	0	0	0	0	0	0	0	0	0	0
1:21549407-21549921	AT1G58200,	3	-	0	0	0	0	0	0	0	0	1	133	0	0	0	0	1	308	0	0	1	202	0	0	0	0	0	0	0	0	0	0	0	0	0	0	0	0
1:21597534-21597785	AT1G58250,	1	-	0	0	0	0	0	0	0	0	0	0	0	0	1	247	2	261	0	0	0	0	0	0	0	0	0	0	0	0	0	0	0	0	0	0	0	0
1:2180577-2181011	AT1G07110,	3	-	0	0	0	0	2	377	1	375	0	0	0	0	0	0	0	0	0	0	0	0	0	0	0	0	0	0	0	0	0	0	0	0	0	0	0	0
1:2180954-2181582	AT1G07110,	4	-	0	0	1	575	1	417	0	0	0	0	0	0	0	0	0	0	0	0	0	0	0	0	0	0	0	0	1	423	0	0	0	0	0	0	0	0
1:21875254-21876190	AT1G59540,	5	+	0	0	0	0	0	0	0	0	0	0	1	223	1	200	0	0	0	0	0	0	0	0	0	0	0	0	1	15	0	0	0	0	0	0	0	0
1:21986472-21986670	AT1G59760,	2	-	0	0	0	0	0	0	0	0	0	0	0	0	1	372	2	453	0	0	0	0	0	0	0	0	0	0	0	0	0	0	0	0	0	0	0	0
1:22484088-22484255	AT1G61040,	1	+	0	0	0	0	0	0	0	0	1	163	1	375	0	0	0	0	1	19	0	0	0	0	0	0	0	0	0	0	0	0	0	0	0	0	0	0
1:22509062-22509220	AT1G61100,	1	-	0	0	0	0	0	0	0	0	0	0	0	0	0	0	0	0	0	0	0	0	0	0	0	0	0	0	0	0	0	0	0	0	3	192	0	0
1:22586467-22586973	AT1G61250,	3	+	0	0	0	0	0	0	0	0	0	0	0	0	1	2131	0	0	0	0	0	0	0	0	0	0	0	0	0	0	1	622	1	1243	0	0	0	0
1:22919791-22920021	AT1G62020,	1	+	0	0	0	0	0	0	0	0	0	0	0	0	0	0	0	0	0	0	0	0	0	0	3	183	0	0	0	0	0	0	0	0	0	0	0	0
1:23233720-23233918	AT1G62750,	2	-	0	0	1	2429	0	0	0	0	0	0	0	0	0	0	0	0	1	361	0	0	0	0	0	0	0	0	0	0	0	0	0	0	0	0	1	870
1:23457451-23457933	AT1G63240,	3	-	0	0	0	0	0	0	0	0	0	0	1	161	0	0	0	0	0	0	0	0	0	0	0	0	1	61	0	0	0	0	1	306	0	0	0	0
1:23517495-23517859	AT1G63420,	2	+	0	0	0	0	0	0	0	0	0	0	1	663	0	0	0	0	0	0	0	0	0	0	1	120	0	0	0	0	1	202	0	0	0	0	0	0
1:23980604-23981096	AT1G64570,	2	+	0	0	0	0	0	0	0	0	3	104	0	0	0	0	0	0	0	0	0	0	0	0	0	0	0	0	0	0	0	0	0	0	0	0	0	0
1:24036232-24036376	AT1G64680,	1	+	0	0	0	0	0	0	0	0	0	0	0	0	0	0	0	0	0	0	0	0	0	0	3	1242	0	0	0	0	0	0	0	0	0	0	0	0
1:24165905-24285924	n/a		-	0	0	0	0	0	0	0	0	0	0	0	0	0	0	0	0	0	0	0	0	0	0	0	0	0	0	0	0	0	0	0	0	0	0	3	293
1:24229673-24230095	AT1G65230,	2	+	0	0	0	0	2	609	0	0	0	0	0	0	0	0	0	0	0	0	1	788	0	0	0	0	0	0	0	0	0	0	0	0	0	0	0	0
1:24284817-24285757	AT1G65370,	4	-	0	0	0	0	0	0	0	0	2	671	1	863	0	0	0	0	0	0	0	0	0	0	0	0	0	0	0	0	0	0	0	0	0	0	0	0
1:2437993-2438556	AT1G07890,	3	+	0	0	0	0	0	0	0	0	0	0	2	8079	0	0	0	0	0	0	0	0	0	0	0	0	0	0	1	1823	0	0	0	0	0	0	0	0
1:24547704-24547884	AT1G65950,	1	-	0	0	0	0	0	0	0	0	2	61	0	0	0	0	0	0	0	0	0	0	0	0	0	0	0	0	0	0	1	52	0	0	0	0	0	0
1:24548255-24549106	AT1G65950,	3	-	0	0	0	0	0	0	0	0	1	71	0	0	0	0	0	0	0	0	0	0	0	0	0	0	0	0	0	0	0	0	0	0	0	0	2	67
1:24707584-24707801	AT1G66280,	1	-	0	0	0	0	0	0	0	0	0	0	0	0	1	1870	2	2462	0	0	0	0	0	0	0	0	0	0	0	0	0	0	0	0	0	0	0	0
1:24774478-24774804	AT1G66410,	1	-	3	1037	0	0	0	0	0	0	0	0	0	0	0	0	0	0	0	0	0	0	0	0	0	0	0	0	0	0	0	0	0	0	0	0	0	0
1:24821701-24821964	AT1G66530,	2	-	0	0	0	0	0	0	0	0	2	201	0	0	1	254	0	0	0	0	0	0	0	0	0	0	0	0	0	0	0	0	0	0	0	0	0	0
1:24993695-24995203	AT1G66970,	4	-	0	0	0	0	0	0	0	0	0	0	0	0	0	0	0	0	0	0	0	0	3	556	0	0	0	0	0	0	0	0	0	0	0	0	0	0
1:250669-251066	AT1G01690,	2	+	0	0	0	0	0	0	0	0	0	0	1	124	0	0	0	0	0	0	0	0	0	0	0	0	0	0	0	0	0	0	0	0	1	82	1	76
1:25262457-25262970	AT1G67430,	2	+	0	0	1	5503	0	0	0	0	1	8002	0	0	0	0	0	0	0	0	0	0	0	0	0	0	0	0	0	0	1	5574	0	0	0	0	0	0
1:25371528-25371690	AT1G67690,	1	+	0	0	0	0	0	0	0	0	0	0	2	89	0	0	0	0	0	0	0	0	0	0	0	0	0	0	0	0	1	39	0	0	0	0	0	0
1:25388830-25389256	AT1G67720,	2	+	0	0	0	0	0	0	0	0	3	212	0	0	0	0	0	0	0	0	0	0	0	0	0	0	0	0	0	0	0	0	0	0	0	0	0	0
1:25494129-25494333	AT1G68010,	2	+	0	0	0	0	0	0	1	2561	0	0	0	0	0	0	0	0	0	0	0	0	0	0	0	0	0	0	0	0	0	0	1	2493	1	2028	0	0
1:25494280-25494495	AT1G68010,	2	+	0	0	0	0	0	0	0	0	0	0	0	0	0	0	0	0	0	0	0	0	0	0	0	0	0	0	0	0	0	0	0	0	3	1996	0	0
1:25560075-25560597	AT1G68190,	2	+	0	0	0	0	1	386	0	0	0	0	0	0	0	0	0	0	0	0	0	0	0	0	0	0	0	0	0	0	0	0	1	153	1	88	0	0
1:25749070-25749646	AT1G68570,	1	+	0	0	0	0	0	0	0	0	0	0	0	0	0	0	0	0	0	0	0	0	0	0	0	0	0	0	0	0	0	0	1	1136	2	2042	0	0
1:26022874-26024509	AT1G69220,	6	-	0	0	0	0	0	0	0	0	0	0	0	0	0	0	0	0	0	0	0	0	0	0	3	121	0	0	0	0	0	0	0	0	0	0	0	0
1:2636664-2636867	AT1G08360,	1	+	1	1534	0	0	0	0	0	0	1	3661	0	0	0	0	0	0	0	0	0	0	0	0	0	0	0	0	0	0	0	0	0	0	0	0	1	3106
1:2637656-2637800	AT1G08360,	1	-	0	0	0	0	0	0	1	1874	0	0	0	0	0	0	0	0	0	0	0	0	0	0	0	0	0	0	0	0	0	0	0	0	2	3493	0	0
1:26421849-26422049	AT1G70160,	1	+	0	0	0	0	0	0	1	372	0	0	1	620	0	0	0	0	0	0	0	0	0	0	0	0	0	0	0	0	0	0	0	0	1	864	0	0
1:26535285-26536517	AT1G70410,	4	-	0	0	0	0	1	1104	1	937	0	0	0	0	0	0	0	0	0	0	0	0	0	0	1	1266	0	0	0	0	0	0	0	0	0	0	0	0
1:26619134-26619804	AT1G70590,	2	+	0	0	0	0	0	0	0	0	0	0	0	0	0	0	0	0	0	0	0	0	0	0	2	222	0	0	0	0	0	0	0	0	1	133	0	0
1:26627075-26627540	AT1G70620,	2	+	0	0	0	0	0	0	0	0	0	0	2	364	0	0	0	0	0	0	0	0	0	0	0	0	0	0	0	0	0	0	0	0	1	130	0	0
1:26627809-26630303	AT1G70620,	8	+	0	0	0	0	0	0	0	0	0	0	0	0	0	0	0	0	0	0	0	0	0	0	1	401	0	0	2	84	0	0	0	0	0	0	0	0
1:26627842-26630303	AT1G70620,	8	+	0	0	0	0	0	0	0	0	0	0	0	0	0	0	0	0	0	0	0	0	0	0	1	440	0	0	0	0	1	129	1	281	0	0	0	0
1:26641639-26641928	AT1G70650,AT1G70660,	2	+	0	0	0	0	0	0	0	0	2	930	0	0	0	0	0	0	0	0	0	0	0	0	0	0	0	0	0	0	1	350	0	0	0	0	0	0
1:26645412-26647879	n/a		+	0	0	0	0	0	0	0	0	0	0	0	0	0	0	0	0	0	0	0	0	0	0	0	0	0	0	0	0	0	0	0	0	3	514	0	0
1:2697015-2699920	AT1G08520,	10	+	0	0	2	819	1	840	0	0	0	0	0	0	0	0	0	0	0	0	0	0	0	0	0	0	0	0	0	0	0	0	0	0	0	0	0	0
1:27148639-27148806	AT1G72150,	1	+	0	0	0	0	0	0	0	0	0	0	2	7108	0	0	0	0	1	804	0	0	0	0	0	0	0	0	0	0	0	0	0	0	0	0	0	0
1:27199020-27199215	AT1G72260,	2	-	0	0	0	0	0	0	0	0	0	0	0	0	0	0	0	0	0	0	0	0	0	0	0	0	0	0	0	0	0	0	1	4585	2	10339	0	0
1:27243014-27243167	AT1G72370,	1	+	0	0	0	0	0	0	0	0	1	1658	0	0	0	0	0	0	0	0	0	0	0	0	0	0	0	0	0	0	0	0	0	0	2	2617	0	0
1:27243619-27243816	AT1G72370,	1	-	0	0	0	0	0	0	0	0	1	4287	0	0	1	8090	1	10337	0	0	0	0	0	0	0	0	0	0	0	0	0	0	0	0	0	0	0	0
1:27373744-27373892	AT1G72710,	1	+	0	0	0	0	0	0	0	0	0	0	1	1540	1	1252	0	0	0	0	0	0	0	0	0	0	0	0	0	0	0	0	0	0	1	784	0	0
1:27373970-27374213	AT1G72710,	2	+	0	0	0	0	2	754	0	0	0	0	0	0	1	1465	0	0	0	0	0	0	0	0	0	0	0	0	0	0	0	0	0	0	0	0	0	0
1:27373970-27375146	AT1G72710,	6	+	0	0	0	0	0	0	0	0	0	0	0	0	1	1255	0	0	0	0	0	0	0	0	2	1149	0	0	0	0	0	0	0	0	0	0	0	0
1:27569433-27569655	AT1G73330,	1	+	0	0	0	0	0	0	0	0	0	0	3	136467	0	0	0	0	0	0	0	0	0	0	0	0	0	0	0	0	0	0	0	0	0	0	0	0
1:2758319-2758553	AT1G08660,	2	-	0	0	0	0	0	0	0	0	0	0	0	0	0	0	3	656	0	0	0	0	0	0	0	0	0	0	0	0	0	0	0	0	0	0	0	0
1:27603949-27606480	AT1G73430,	11	+	0	0	0	0	0	0	0	0	0	0	0	0	0	0	1	475	0	0	0	0	0	0	0	0	2	57	0	0	0	0	0	0	0	0	0	0
1:27614701-27620997	n/a		+	0	0	0	0	0	0	0	0	0	0	2	134	0	0	0	0	0	0	1	40	0	0	0	0	0	0	0	0	0	0	0	0	0	0	0	0
1:2764236-2764689	AT1G08680,	3	+	0	0	0	0	0	0	0	0	0	0	1	450	2	428	0	0	0	0	0	0	0	0	0	0	0	0	0	0	0	0	0	0	0	0	0	0
1:27671799-27672132	AT1G73600,	2	+	0	0	0	0	0	0	0	0	0	0	0	0	0	0	0	0	0	0	0	0	0	0	3	3641	0	0	0	0	0	0	0	0	0	0	0	0
1:27672022-27672355	AT1G73600,	2	+	0	0	0	0	0	0	0	0	0	0	2	1623	0	0	0	0	0	0	0	0	0	0	0	0	0	0	0	0	0	0	0	0	0	0	1	234
1:27690631-27690784	AT1G73655,	1	-	1	647	1	1709	0	0	0	0	0	0	0	0	0	0	0	0	1	527	0	0	0	0	0	0	0	0	0	0	0	0	0	0	0	0	0	0
1:27704533-27704776	AT1G73680,	1	-	0	0	0	0	0	0	0	0	0	0	0	0	1	57	0	0	0	0	0	0	0	0	0	0	0	0	0	0	0	0	1	203	0	0	1	372
1:27847265-27850078	n/a		-	0	0	0	0	0	0	0	0	0	0	0	0	0	0	3	4399	0	0	0	0	0	0	0	0	0	0	0	0	0	0	0	0	0	0	0	0
1:28063844-28064529	AT1G74690,	2	-	0	0	0	0	0	0	0	0	0	0	3	1888	0	0	0	0	0	0	0	0	0	0	0	0	0	0	0	0	0	0	0	0	0	0	0	0
1:28165537-28165674	AT1G75010,	1	-	1	45	0	0	0	0	0	0	1	47	0	0	0	0	0	0	0	0	0	0	0	0	0	0	0	0	0	0	1	42	0	0	0	0	0	0
1:28252300-28255737	n/a		+	0	0	0	0	0	0	0	0	1	1180	2	2140	0	0	0	0	0	0	0	0	0	0	0	0	0	0	0	0	0	0	0	0	0	0	0	0
1:28279279-28279591	AT1G75370,	1	-	0	0	0	0	0	0	0	0	0	0	0	0	0	0	0	0	0	0	1	520	2	259	0	0	0	0	0	0	0	0	0	0	0	0	0	0
1:28511681-28513137	AT1G75940,	7	+	0	0	0	0	0	0	0	0	0	0	0	0	0	0	0	0	0	0	0	0	0	0	0	0	0	0	0	0	0	0	0	0	3	3221	0	0
1:28711134-28712510	AT1G76510,	5	-	0	0	0	0	0	0	0	0	3	136	0	0	0	0	0	0	0	0	0	0	0	0	0	0	0	0	0	0	0	0	0	0	0	0	0	0
1:28773334-28774852	AT1G76670,	4	-	0	0	0	0	0	0	0	0	0	0	0	0	0	0	3	1037	0	0	0	0	0	0	0	0	0	0	0	0	0	0	0	0	0	0	0	0
1:28975481-28975810	AT1G77120,	2	+	0	0	0	0	0	0	0	0	1	316	0	0	2	1076	0	0	0	0	0	0	0	0	0	0	0	0	0	0	0	0	0	0	0	0	0	0
1:2920468-2920694	AT1G09050,	1	+	0	0	0	0	0	0	0	0	0	0	0	0	0	0	0	0	0	0	0	0	0	0	3	95	0	0	0	0	0	0	0	0	0	0	0	0
1:29255385-29256515	AT1G77800,	4	+	0	0	0	0	0	0	0	0	0	0	0	0	2	118	0	0	0	0	0	0	0	0	1	58	0	0	0	0	0	0	0	0	0	0	0	0
1:29307017-29309756	AT1G77950,	10	+	0	0	0	0	0	0	0	0	0	0	0	0	2	42	1	72	0	0	0	0	0	0	0	0	0	0	0	0	0	0	0	0	0	0	0	0
1:29308324-29309756	AT1G77950,	9	+	0	0	0	0	0	0	1	0	0	0	0	0	0	0	2	69	0	0	0	0	0	0	0	0	0	0	0	0	0	0	0	0	0	0	0	0
1:29394972-29395167	AT1G78120,	1	-	0	0	0	0	0	0	0	0	1	764	2	1388	0	0	0	0	0	0	0	0	0	0	0	0	0	0	0	0	0	0	0	0	0	0	0	0
1:2940377-2940576	AT1G09130,	2	-	0	0	0	0	1	703	0	0	0	0	0	0	0	0	0	0	0	0	0	0	0	0	0	0	1	762	0	0	0	0	0	0	0	0	1	549
1:29576722-29577015	AT1G78630,	2	-	3	3333	0	0	0	0	0	0	0	0	0	0	0	0	0	0	0	0	0	0	0	0	0	0	0	0	0	0	0	0	0	0	0	0	0	0
1:29623929-29624528	AT1G78790,	4	-	0	0	0	0	1	94	1	87	0	0	0	0	1	240	0	0	0	0	0	0	0	0	0	0	0	0	0	0	0	0	0	0	0	0	0	0
1:29776165-29777569	AT1G79150,	5	-	0	0	0	0	0	0	1	87	0	0	1	234	0	0	0	0	0	0	0	0	0	0	0	0	0	0	0	0	0	0	1	209	0	0	0	0
1:29777116-29777569	AT1G79150,	2	-	0	0	0	0	0	0	0	0	0	0	0	0	0	0	0	0	0	0	0	0	0	0	2	59	0	0	0	0	0	0	1	183	0	0	0	0
1:29913624-29914689	AT1G79520,	1	-	0	0	0	0	0	0	0	0	0	0	0	0	0	0	2	248	0	0	0	0	0	0	0	0	0	0	0	0	0	0	0	0	1	618	0	0
1:29951881-29952108	AT1G79600,	1	-	0	0	0	0	0	0	0	0	0	0	0	0	0	0	0	0	0	0	0	0	0	0	1	678	2	455	0	0	0	0	0	0	0	0	0	0
1:29973361-29973634	AT1G79650,	2	-	0	0	0	0	1	110	0	0	0	0	0	0	1	258	0	0	0	0	0	0	0	0	0	0	0	0	0	0	0	0	0	0	1	189	0	0
1:30047117-30047323	AT1G79880,	2	-	0	0	0	0	0	0	0	0	0	0	1	326	0	0	0	0	0	0	0	0	0	0	0	0	0	0	0	0	0	0	0	0	1	76	1	95
1:30060702-30065466	n/a		-	0	0	0	0	0	0	0	0	0	0	0	0	0	0	2	1186	0	0	0	0	0	0	0	0	0	0	0	0	0	0	0	0	1	611	0	0
1:30087418-30088192	AT1G79990,	4	+	0	0	0	0	0	0	1	199	0	0	0	0	0	0	1	641	0	0	0	0	1	46	0	0	0	0	0	0	0	0	0	0	0	0	0	0
1:30215066-30215677	AT1G80370,	3	+	0	0	1	61	0	0	0	0	0	0	0	0	1	118	0	0	0	0	0	0	0	0	1	12	0	0	0	0	0	0	0	0	0	0	0	0
1:30266115-30266294	AT1G80490,	1	-	0	0	0	0	0	0	0	0	0	0	0	0	0	0	1	585	0	0	0	0	2	43	0	0	0	0	0	0	0	0	0	0	0	0	0	0
1:30306457-30306740	AT1G80620,	2	+	0	0	0	0	0	0	0	0	0	0	0	0	2	363	0	0	0	0	0	0	0	0	0	0	0	0	0	0	0	0	0	0	1	207	0	0
1:3120117-3120686	AT1G09640,	3	+	0	0	0	0	0	0	0	0	0	0	0	0	0	0	1	4075	0	0	0	0	0	0	2	1173	0	0	0	0	0	0	0	0	0	0	0	0
1:3120117-3121060	AT1G09640,	5	+	0	0	0	0	0	0	0	0	0	0	2	3714	0	0	0	0	0	0	0	0	0	0	0	0	0	0	0	0	0	0	0	0	1	1919	0	0
1:3255150-3255423	AT1G09970,	1	+	0	0	0	0	0	0	0	0	0	0	0	0	0	0	3	3815	0	0	0	0	0	0	0	0	0	0	0	0	0	0	0	0	0	0	0	0
1:329781-329924	AT1G01950,	1	+	0	0	0	0	0	0	0	0	1	147	2	246	0	0	0	0	0	0	0	0	0	0	0	0	0	0	0	0	0	0	0	0	0	0	0	0
1:3371619-3372093	AT1G10290,	2	+	0	0	0	0	0	0	0	0	0	0	0	0	0	0	3	1022	0	0	0	0	0	0	0	0	0	0	0	0	0	0	0	0	0	0	0	0
1:3408415-3408813	AT1G10390,	2	-	0	0	0	0	0	0	0	0	0	0	0	0	0	0	0	0	0	0	0	0	0	0	0	0	0	0	1	101	0	0	1	290	0	0	1	208
1:3582033-3582198	AT1G10760,	2	-	0	0	1	1050	0	0	0	0	0	0	0	0	0	0	0	0	0	0	2	2474	0	0	0	0	0	0	0	0	0	0	0	0	0	0	0	0
1:3652949-3653341	AT1G10930,	2	-	0	0	0	0	0	0	0	0	1	63	0	0	0	0	0	0	0	0	0	0	0	0	0	0	0	0	0	0	0	0	2	138	0	0	0	0
1:3664407-3664628	AT1G10960,	1	-	1	591	2	955	0	0	0	0	0	0	0	0	0	0	0	0	0	0	0	0	0	0	0	0	0	0	0	0	0	0	0	0	0	0	0	0
1:383395-383688	AT1G02080,	2	+	0	0	0	0	0	0	0	0	0	0	2	686	0	0	0	0	0	0	1	140	0	0	0	0	0	0	0	0	0	0	0	0	0	0	0	0
1:398292-398713	AT1G02120,	3	+	0	0	0	0	0	0	2	155	0	0	0	0	0	0	1	621	0	0	0	0	0	0	0	0	0	0	0	0	0	0	0	0	0	0	0	0
1:419675-419894	AT1G02205,	1	+	0	0	0	0	0	0	0	0	0	0	0	0	0	0	0	0	0	0	0	0	0	0	3	519	0	0	0	0	0	0	0	0	0	0	0	0
1:4224054-4224314	AT1G12410,	2	-	0	0	1	1345	0	0	0	0	2	530	0	0	0	0	0	0	0	0	0	0	0	0	0	0	0	0	0	0	0	0	0	0	0	0	0	0
1:4364773-4364964	AT1G12800,	2	+	0	0	0	0	0	0	0	0	0	0	0	0	0	0	0	0	0	0	0	0	0	0	0	0	0	0	0	0	0	0	0	0	0	0	3	435
1:454622-455040	AT1G02300,	2	+	0	0	0	0	1	158	0	0	0	0	0	0	0	0	0	0	0	0	0	0	1	178	0	0	0	0	0	0	1	75	0	0	0	0	0	0
1:4570350-4570611	AT1G13340,	2	-	0	0	0	0	0	0	0	0	1	468	1	899	0	0	0	0	0	0	0	0	0	0	0	0	0	0	0	0	0	0	1	51	0	0	0	0
1:5008865-5009036	AT1G14610,	2	+	0	0	0	0	0	0	0	0	0	0	3	1241	0	0	0	0	0	0	0	0	0	0	0	0	0	0	0	0	0	0	0	0	0	0	0	0
1:5038249-5038834	AT1G14670,	1	+	0	0	0	0	0	0	0	0	0	0	0	0	1	1990	0	0	0	0	0	0	0	0	0	0	0	0	0	0	0	0	2	1182	0	0	0	0
1:519082-519251	AT1G02500,	1	-	0	0	0	0	0	0	0	0	0	0	0	0	1	7361	0	0	0	0	1	1258	0	0	1	2938	0	0	0	0	0	0	0	0	0	0	0	0
1:5221659-5225370	n/a		+	0	0	0	0	0	0	0	0	0	0	0	0	1	26	1	33	0	0	0	0	0	0	0	0	0	0	0	0	0	0	0	0	1	45	0	0
1:5297907-5298107	AT1G05163,AT1G15405,	1	+	0	0	0	0	0	0	0	0	0	0	0	0	0	0	1	2224168	0	0	0	0	0	0	0	0	0	0	0	0	0	0	0	0	2	1318994	0	0
1:5363938-5364252	AT1G15570,	2	+	0	0	0	0	0	0	0	0	0	0	1	362	1	261	0	0	0	0	0	0	0	0	0	0	0	0	0	0	0	0	0	0	1	162	0	0
1:538936-539479	AT1G02560,	3	+	0	0	0	0	0	0	0	0	0	0	0	0	0	0	0	0	0	0	1	1124	0	0	2	2712	0	0	0	0	0	0	0	0	0	0	0	0
1:5418459-5419165	AT1G15750,	3	-	0	0	0	0	0	0	0	0	0	0	0	0	0	0	0	0	0	0	0	0	0	0	3	350	0	0	0	0	0	0	0	0	0	0	0	0
1:5418554-5418832	AT1G15750,	2	-	0	0	0	0	0	0	0	0	0	0	0	0	1	1880	1	2246	0	0	0	0	0	0	0	0	0	0	0	0	0	0	1	844	0	0	0	0
1:5803348-5804772	AT1G16970,	6	-	0	0	0	0	0	0	0	0	3	132	0	0	0	0	0	0	0	0	0	0	0	0	0	0	0	0	0	0	0	0	0	0	0	0	0	0
1:5888297-5889406	AT1G17220,	4	+	0	0	1	1255	0	0	1	927	0	0	0	0	0	0	0	0	0	0	0	0	0	0	1	1796	0	0	0	0	0	0	0	0	0	0	0	0
1:600434-600976	AT1G02740,	3	-	0	0	0	0	0	0	0	0	1	117	0	0	0	0	2	196	0	0	0	0	0	0	0	0	0	0	0	0	0	0	0	0	0	0	0	0
1:6094168-6094605	AT1G17720,	3	-	0	0	0	0	1	259	0	0	1	500	1	952	0	0	0	0	0	0	0	0	0	0	0	0	0	0	0	0	0	0	0	0	0	0	0	0
1:6097164-6097959	AT1G17720,	0	-	0	0	0	0	0	0	0	0	0	0	0	0	0	0	3	91	0	0	0	0	0	0	0	0	0	0	0	0	0	0	0	0	0	0	0	0
1:611479-611679	AT1G02790,	2	-	0	0	0	0	0	0	0	0	0	0	0	0	0	0	0	0	0	0	0	0	0	0	0	0	0	0	0	0	0	0	0	0	3	6993	0	0
1:6244686-6244900	AT1G18150,	2	-	0	0	0	0	0	0	0	0	0	0	1	315	0	0	0	0	0	0	0	0	0	0	0	0	0	0	0	0	0	0	0	0	0	0	2	331
1:628296-628469	AT1G02840,	1	+	0	0	0	0	0	0	0	0	1	1162	0	0	1	1438	1	1939	0	0	0	0	0	0	0	0	0	0	0	0	0	0	0	0	0	0	0	0
1:6370888-6371807	AT1G18500,	5	+	0	0	0	0	0	0	0	0	1	241	0	0	0	0	2	680	0	0	0	0	0	0	0	0	0	0	0	0	0	0	0	0	0	0	0	0
1:646567-646956	AT1G02890,	2	-	0	0	0	0	0	0	0	0	0	0	0	0	0	0	0	0	1	47	0	0	2	105	0	0	0	0	0	0	0	0	0	0	0	0	0	0
1:659556-661949	n/a		-	0	0	0	0	0	0	0	0	3	569	0	0	0	0	0	0	0	0	0	0	0	0	0	0	0	0	0	0	0	0	0	0	0	0	0	0
1:668613-669266	AT1G02960,	4	-	0	0	0	0	0	0	0	0	0	0	0	0	1	301	1	360	0	0	0	0	0	0	0	0	0	0	0	0	0	0	0	0	1	127	0	0
1:6726456-6726605	AT1G19430,	1	-	0	0	0	0	0	0	0	0	0	0	1	449	1	308	0	0	0	0	1	95	0	0	0	0	0	0	0	0	0	0	0	0	0	0	0	0
1:6892616-6893236	AT1G19860,	2	-	0	0	0	0	0	0	0	0	0	0	0	0	0	0	0	0	0	0	0	0	0	0	1	106	0	0	2	42	0	0	0	0	0	0	0	0
1:7008413-7008824	AT1G20225,	2	-	0	0	0	0	0	0	0	0	0	0	0	0	1	436	0	0	0	0	0	0	0	0	0	0	0	0	0	0	0	0	0	0	0	0	2	387
1:7129925-7134218	n/a		+	0	0	0	0	0	0	0	0	0	0	0	0	0	0	0	0	0	0	0	0	0	0	3	131	0	0	0	0	0	0	0	0	0	0	0	0
1:7180368-7180754	AT1G20696,	3	+	0	0	0	0	0	0	0	0	0	0	0	0	0	0	0	0	0	0	0	0	0	0	0	0	0	0	0	0	0	0	0	0	2	3439	1	2721
1:731865-732043	AT1G03080,	1	-	0	0	0	0	0	0	0	0	0	0	3	1114	0	0	0	0	0	0	0	0	0	0	0	0	0	0	0	0	0	0	0	0	0	0	0	0
1:7395724-7399469	n/a		-	0	0	0	0	2	1135	0	0	0	0	0	0	0	0	0	0	0	0	0	0	0	0	0	0	0	0	0	0	0	0	1	40	0	0	0	0
1:762510-763430	AT1G03160,	3	+	0	0	0	0	0	0	0	0	0	0	0	0	0	0	0	0	0	0	0	0	0	0	3	538	0	0	0	0	0	0	0	0	0	0	0	0
1:7633328-7633632	AT1G21730,	2	+	0	0	0	0	0	0	0	0	0	0	2	301	0	0	0	0	0	0	0	0	0	0	0	0	0	0	0	0	0	0	1	150	0	0	0	0
1:766280-767266	n/a		+	0	0	0	0	0	0	0	0	0	0	0	0	0	0	1	13	0	0	0	0	0	0	2	80	0	0	0	0	0	0	0	0	0	0	0	0
1:7870830-7871330	AT1G22275,	3	+	0	0	0	0	1	2	0	0	0	0	0	0	0	0	0	0	0	0	0	0	0	0	0	0	1	0	0	0	0	0	0	0	1	10	0	0
1:7978151-7978368	AT1G22570,	1	-	0	0	0	0	0	0	0	0	0	0	0	0	0	0	0	0	0	0	0	0	0	0	0	0	1	253	2	194	0	0	0	0	0	0	0	0
1:8049215-8049419	AT1G22740,	2	+	0	0	0	0	0	0	0	0	1	72	0	0	0	0	0	0	0	0	0	0	0	0	0	0	1	101	0	0	0	0	0	0	0	0	1	51
1:8118024-8118669	AT1G22930,	2	+	0	0	0	0	0	0	0	0	0	0	0	0	0	0	0	0	0	0	0	0	0	0	3	960	0	0	0	0	0	0	0	0	0	0	0	0
1:8223177-8223355	AT1G23190,	1	+	0	0	0	0	0	0	0	0	0	0	0	0	0	0	0	0	0	0	0	0	0	0	3	762	0	0	0	0	0	0	0	0	0	0	0	0
1:8257451-8258324	AT1G23260,	3	-	0	0	0	0	0	0	0	0	1	883	1	1639	0	0	1	1333	0	0	0	0	0	0	0	0	0	0	0	0	0	0	0	0	0	0	0	0
1:8365170-8369422	n/a		-	0	0	0	0	0	0	0	0	0	0	0	0	0	0	0	0	0	0	0	0	0	0	0	0	0	0	0	0	0	0	0	0	2	26	1	39
1:8594326-8594697	AT1G24260,	3	-	0	0	0	0	0	0	0	0	0	0	0	0	0	0	0	0	0	0	0	0	0	0	0	0	0	0	0	0	0	0	1	1495	1	2676	1	2071
1:869454-870571	AT1G03475,	6	-	0	0	0	0	0	0	0	0	0	0	0	0	0	0	0	0	1	193	0	0	0	0	0	0	0	0	0	0	0	0	0	0	0	0	2	591
1:8891761-8892276	AT1G25350,	3	-	0	0	0	0	0	0	1	187	1	331	1	580	0	0	0	0	0	0	0	0	0	0	0	0	0	0	0	0	0	0	0	0	0	0	0	0
1:9242044-9242323	AT1G26730,	1	+	0	0	0	0	0	0	0	0	0	0	0	0	1	880	2	1173	0	0	0	0	0	0	0	0	0	0	0	0	0	0	0	0	0	0	0	0
1:9514051-9514524	AT1G27390,	3	-	0	0	0	0	0	0	0	0	0	0	0	0	0	0	1	822	0	0	0	0	0	0	0	0	0	0	0	0	0	0	1	625	1	554	0	0
1:964952-965309	AT1G03830,	2	-	0	0	0	0	0	0	0	0	0	0	1	90	0	0	0	0	0	0	1	7	0	0	0	0	0	0	0	0	0	0	0	0	1	49	0	0
1:979597-981160	AT1G03860,	4	-	0	0	0	0	0	0	0	0	0	0	0	0	0	0	2	950	0	0	0	0	0	0	0	0	0	0	0	0	0	0	0	0	1	429	0	0
1:9942044-9943039	AT1G28340,	5	+	1	99	0	0	0	0	0	0	0	0	0	0	0	0	0	0	0	0	0	0	0	0	0	0	0	0	0	0	0	0	1	333	0	0	1	286
1:9964689-9964877	AT1G28380,	2	+	0	0	0	0	0	0	0	0	0	0	0	0	2	418	0	0	0	0	1	432	0	0	0	0	0	0	0	0	0	0	0	0	0	0	0	0
1:9981630-9981931	AT1G28420,	2	+	0	0	0	0	0	0	0	0	0	0	3	683	0	0	0	0	0	0	0	0	0	0	0	0	0	0	0	0	0	0	0	0	0	0	0	0
1:9982125-9982880	AT1G28420,	2	+	0	0	0	0	0	0	0	0	0	0	0	0	0	0	1	344	0	0	0	0	0	0	0	0	0	0	1	32	0	0	1	191	0	0	0	0
2:10043267-10043407	AT2G23600,	1	-	0	0	0	0	0	0	0	0	0	0	0	0	1	1074	0	0	0	0	0	0	0	0	0	0	0	0	0	0	0	0	2	622	0	0	0	0
2:10719145-10719422	AT2G25170,	2	+	0	0	0	0	1	135	0	0	0	0	1	491	0	0	0	0	0	0	0	0	0	0	0	0	0	0	0	0	0	0	1	336	0	0	0	0
2:11035816-11036352	AT2G25880,	3	-	0	0	1	161	0	0	0	0	0	0	0	0	0	0	0	0	0	0	0	0	0	0	0	0	0	0	0	0	1	130	0	0	1	217	0	0
2:1116142-1116518	AT2G03667,	2	+	0	0	0	0	0	0	0	0	0	0	1	150	0	0	1	141	0	0	0	0	0	0	0	0	1	26	0	0	0	0	0	0	0	0	0	0
2:1138443-1139069	AT2G03730,	1	-	0	0	0	0	0	0	2	216	0	0	1	665	0	0	0	0	0	0	0	0	0	0	0	0	0	0	0	0	0	0	0	0	0	0	0	0
2:11530191-11530623	AT2G27020,	2	-	0	0	0	0	0	0	0	0	1	965	0	0	1	1330	1	1653	0	0	0	0	0	0	0	0	0	0	0	0	0	0	0	0	0	0	0	0
2:11539115-11539374	AT2G27040,	2	-	0	0	0	0	0	0	0	0	0	0	0	0	0	0	1	585	0	0	0	0	0	0	0	0	0	0	0	0	1	252	0	0	0	0	1	487
2:11956996-11957711	AT2G28070,	3	+	0	0	1	117	1	113	0	0	0	0	0	0	0	0	0	0	0	0	0	0	0	0	0	0	0	0	0	0	0	0	0	0	0	0	1	152
2:12096432-12096740	AT2G28320,	2	+	0	0	0	0	0	0	0	0	0	0	0	0	0	0	1	309	0	0	0	0	0	0	0	0	0	0	0	0	0	0	0	0	2	230	0	0
2:12267705-12268093	AT2G28620,	3	-	0	0	0	0	0	0	0	0	3	273	0	0	0	0	0	0	0	0	0	0	0	0	0	0	0	0	0	0	0	0	0	0	0	0	0	0
2:12267894-12268698	AT2G28620,	5	-	1	94	0	0	0	0	0	0	0	0	0	0	1	336	0	0	0	0	0	0	0	0	0	0	0	0	0	0	0	0	1	139	0	0	0	0
2:12590541-12597509	n/a		+	0	0	0	0	0	0	1	335	0	0	0	0	0	0	0	0	0	0	2	311	0	0	0	0	0	0	0	0	0	0	0	0	0	0	0	0
2:1283498-1283909	AT2G04030,	3	+	1	800	0	0	1	948	0	0	0	0	1	627	0	0	0	0	0	0	0	0	0	0	0	0	0	0	0	0	0	0	0	0	0	0	0	0
2:12880778-12881262	AT2G30170,	3	-	0	0	0	0	0	0	0	0	0	0	0	0	0	0	0	0	0	0	0	0	0	0	3	309	0	0	0	0	0	0	0	0	0	0	0	0
2:13209533-13210303	AT2G31040,	4	-	0	0	0	0	0	0	0	0	1	244	0	0	0	0	0	0	0	0	0	0	0	0	0	0	0	0	0	0	0	0	1	752	0	0	1	396
2:13209970-13210273	AT2G31040,	2	-	0	0	1	1259	0	0	0	0	0	0	0	0	0	0	0	0	0	0	0	0	0	0	0	0	0	0	0	0	1	439	1	758	0	0	0	0
2:133317-133974	AT2G01250,	4	-	0	0	0	0	0	0	0	0	1	4773	1	6327	0	0	1	8813	0	0	0	0	0	0	0	0	0	0	0	0	0	0	0	0	0	0	0	0
2:1333640-1333983	AT2G04039,	1	+	0	0	0	0	0	0	0	0	0	0	0	0	0	0	0	0	1	114	0	0	0	0	0	0	0	0	0	0	0	0	2	324	0	0	0	0
2:13392257-13392417	AT2G31410,	1	-	0	0	0	0	0	0	1	453	0	0	0	0	0	0	0	0	0	0	0	0	0	0	0	0	0	0	0	0	0	0	0	0	1	732	1	626
2:13565727-13566218	AT2G31900,	3	-	0	0	0	0	0	0	0	0	3	186	0	0	0	0	0	0	0	0	0	0	0	0	0	0	0	0	0	0	0	0	0	0	0	0	0	0
2:13698254-13699179	AT2G32260,	5	+	0	0	0	0	0	0	0	0	0	0	0	0	0	0	2	711	0	0	0	0	0	0	0	0	0	0	1	107	0	0	0	0	0	0	0	0
2:13698254-13700237	AT2G32260,	7	+	0	0	0	0	1	199	1	196	0	0	0	0	0	0	1	649	0	0	0	0	0	0	0	0	0	0	0	0	0	0	0	0	0	0	0	0
2:1377155-1377360	AT2G04100,	1	-	0	0	0	0	0	0	0	0	0	0	0	0	0	0	3	57	0	0	0	0	0	0	0	0	0	0	0	0	0	0	0	0	0	0	0	0
2:13772416-13773577	AT2G32430,	6	+	0	0	0	0	0	0	0	0	0	0	0	0	0	0	0	0	0	0	0	0	0	0	0	0	0	0	0	0	0	0	2	260	0	0	1	404
2:13867526-13867997	AT2G32700,	2	+	0	0	0	0	0	0	0	0	0	0	0	0	0	0	0	0	0	0	0	0	0	0	0	0	0	0	0	0	0	0	1	1018	2	840	0	0
2:14143895-14144090	AT2G33370,	2	-	0	0	0	0	0	0	0	0	0	0	0	0	0	0	2	2329	0	0	0	0	0	0	0	0	0	0	0	0	0	0	0	0	1	1400	0	0
2:14185402-14187459	AT2G33490,	4	+	0	0	0	0	0	0	1	60	0	0	0	0	1	272	1	303	0	0	0	0	0	0	0	0	0	0	0	0	0	0	0	0	0	0	0	0
2:14353899-14355545	AT2G33980,	3	-	0	0	0	0	0	0	0	0	0	0	0	0	0	0	0	0	0	0	0	0	0	0	0	0	0	0	0	0	0	0	0	0	0	0	3	73
2:14353899-14356826	AT2G33980,	4	-	0	0	0	0	0	0	0	0	0	0	0	0	0	0	1	113	0	0	0	0	0	0	0	0	0	0	0	0	0	0	0	0	1	84	1	69
2:14522884-14523144	AT2G08665,AT2G34420,	1	-	0	0	0	0	0	0	0	0	0	0	0	0	0	0	0	0	0	0	0	0	0	0	0	0	0	0	0	0	0	0	3	34960	0	0	0	0
2:14523083-14523247	AT2G08665,AT2G34420,	1	+	0	0	0	0	0	0	0	0	0	0	0	0	0	0	0	0	3	38273	0	0	0	0	0	0	0	0	0	0	0	0	0	0	0	0	0	0
2:14523107-14523247	AT2G08665,AT2G34420,	1	+	2	38472	0	0	0	0	0	0	0	0	0	0	0	0	0	0	1	39185	0	0	0	0	0	0	0	0	0	0	0	0	0	0	0	0	0	0
2:1452993-1453660	AT2G04235,	2	+	0	0	0	0	0	0	0	0	0	0	1	77	0	0	1	99	0	0	0	0	0	0	0	0	0	0	1	4	0	0	0	0	0	0	0	0
2:14623236-14623731	AT2G34680,	3	-	0	0	0	0	0	0	0	0	0	0	3	1228	0	0	0	0	0	0	0	0	0	0	0	0	0	0	0	0	0	0	0	0	0	0	0	0
2:14642165-14642362	AT2G34710,	1	-	0	0	0	0	1	155	0	0	1	570	1	935	0	0	0	0	0	0	0	0	0	0	0	0	0	0	0	0	0	0	0	0	0	0	0	0
2:14820272-14820512	AT2G35155,	1	-	0	0	0	0	0	0	0	0	0	0	0	0	0	0	0	0	0	0	0	0	0	0	3	84	0	0	0	0	0	0	0	0	0	0	0	0
2:14850373-14850612	AT2G35260,	2	+	0	0	0	0	0	0	1	659	0	0	0	0	0	0	0	0	0	0	0	0	0	0	1	993	0	0	1	411	0	0	0	0	0	0	0	0
2:14850698-14851349	AT2G35260,	4	+	0	0	0	0	1	436	0	0	0	0	0	0	0	0	0	0	0	0	0	0	0	0	1	1425	1	451	0	0	0	0	0	0	0	0	0	0
2:15029955-15030157	AT2G35750,	1	+	0	0	0	0	0	0	0	0	0	0	0	0	0	0	0	0	0	0	0	0	0	0	0	0	0	0	0	0	0	0	0	0	2	52408	1	41061
2:15054084-15054383	AT2G35840,	1	+	0	0	0	0	0	0	0	0	1	316	1	616	0	0	0	0	0	0	0	0	0	0	1	888	0	0	0	0	0	0	0	0	0	0	0	0
2:15170916-15171173	AT2G36160,	2	+	0	0	1	1870	0	0	0	0	0	0	0	0	0	0	0	0	0	0	0	0	0	0	0	0	0	0	0	0	0	0	1	2968	0	0	1	3137
2:15172862-15173042	AT2G36170,	2	+	0	0	2	1523	0	0	0	0	1	2186	0	0	0	0	0	0	0	0	0	0	0	0	0	0	0	0	0	0	0	0	0	0	0	0	0	0
2:15321142-15321469	AT2G36530,	3	-	0	0	0	0	0	0	0	0	0	0	0	0	0	0	3	10237	0	0	0	0	0	0	0	0	0	0	0	0	0	0	0	0	0	0	0	0
2:15321245-15321450	AT2G36530,	2	-	0	0	0	0	0	0	0	0	0	0	0	0	0	0	3	9193	0	0	0	0	0	0	0	0	0	0	0	0	0	0	0	0	0	0	0	0
2:15335828-15336005	AT2G36570,	1	-	0	0	0	0	0	0	0	0	0	0	1	4172	0	0	2	2774	0	0	0	0	0	0	0	0	0	0	0	0	0	0	0	0	0	0	0	0
2:1533988-1534148	AT2G04410,	2	-	0	0	0	0	0	0	0	0	0	0	3	1680	0	0	0	0	0	0	0	0	0	0	0	0	0	0	0	0	0	0	0	0	0	0	0	0
2:15468545-15468934	AT2G36850,	2	-	0	0	0	0	0	0	0	0	0	0	0	0	0	0	0	0	1	41	0	0	0	0	2	501	0	0	0	0	0	0	0	0	0	0	0	0
2:15502635-15502810	AT2G36910,	1	+	0	0	0	0	0	0	0	0	1	871	0	0	0	0	0	0	0	0	0	0	0	0	0	0	0	0	0	0	1	583	0	0	1	1126	0	0
2:15503808-15504000	AT2G36910,	2	-	0	0	0	0	0	0	0	0	0	0	0	0	0	0	0	0	0	0	0	0	0	0	0	0	0	0	0	0	0	0	0	0	3	833	0	0
2:15796361-15796632	AT2G37660,	1	-	0	0	0	0	0	0	0	0	0	0	0	0	0	0	0	0	0	0	0	0	0	0	0	0	0	0	0	0	3	1142	0	0	0	0	0	0
2:15990229-15991951	AT2G38170,	6	-	0	0	0	0	0	0	1	1653	0	0	0	0	0	0	1	489	0	0	1	2619	0	0	0	0	0	0	0	0	0	0	0	0	0	0	0	0
2:15990703-15991072	AT2G38170,	2	-	0	0	0	0	0	0	0	0	0	0	0	0	0	0	0	0	1	914	0	0	2	1465	0	0	0	0	0	0	0	0	0	0	0	0	0	0
2:16130517-16130685	AT2G38540,	1	-	0	0	0	0	0	0	0	0	0	0	0	0	0	0	0	0	0	0	0	0	0	0	0	0	0	0	0	0	0	0	1	30220	1	67197	1	52818
2:16130890-16131028	AT2G38540,	1	+	0	0	0	0	0	0	0	0	0	0	0	0	0	0	0	0	0	0	0	0	0	0	1	5013	0	0	0	0	0	0	0	0	2	34945	0	0
2:16171043-16171519	AT2G38670,	3	+	0	0	0	0	0	0	0	0	0	0	0	0	2	563	0	0	0	0	0	0	0	0	0	0	0	0	0	0	0	0	0	0	1	566	0	0
2:16229777-16231177	AT2G38840,	3	+	0	0	0	0	0	0	0	0	0	0	0	0	0	0	0	0	0	0	0	0	0	0	0	0	2	36	0	0	0	0	1	154	0	0	0	0
2:16265766-16266230	AT2G38960,	2	+	0	0	0	0	1	34	0	0	0	0	0	0	2	148	0	0	0	0	0	0	0	0	0	0	0	0	0	0	0	0	0	0	0	0	0	0
2:16292373-16292668	AT2G39010,	1	+	0	0	0	0	2	1149	0	0	0	0	0	0	0	0	0	0	0	0	0	0	0	0	0	0	0	0	0	0	0	0	0	0	1	1285	0	0
2:16415338-16416330	AT2G39310,	2	-	0	0	0	0	0	0	0	0	0	0	2	5292	1	1078	0	0	0	0	0	0	0	0	0	0	0	0	0	0	0	0	0	0	0	0	0	0
2:16540240-16540412	AT2G39681,	1	-	0	0	0	0	0	0	0	0	2	303	0	0	0	0	0	0	0	0	0	0	0	0	0	0	0	0	0	0	1	182	0	0	0	0	0	0
2:16599952-16600147	AT2G39800,	2	-	0	0	0	0	0	0	0	0	0	0	0	0	0	0	0	0	0	0	1	2005	0	0	0	0	0	0	0	0	0	0	0	0	0	0	2	3168
2:16727199-16727352	AT2G40060,	1	+	0	0	0	0	0	0	0	0	3	2516	0	0	0	0	0	0	0	0	0	0	0	0	0	0	0	0	0	0	0	0	0	0	0	0	0	0
2:17136002-17138943	n/a		+	0	0	0	0	0	0	0	0	0	0	0	0	0	0	0	0	0	0	0	0	0	0	3	7145	0	0	0	0	0	0	0	0	0	0	0	0
2:1736831-1737437	AT2G04940,	3	-	0	0	0	0	0	0	0	0	0	0	0	0	3	265	0	0	0	0	0	0	0	0	0	0	0	0	0	0	0	0	0	0	0	0	0	0
2:17376489-17376996	AT2G41680,	3	-	0	0	1	1466	0	0	0	0	0	0	0	0	1	220	0	0	0	0	0	0	0	0	0	0	1	595	0	0	0	0	0	0	0	0	0	0
2:17411175-17411392	AT2G41740,	1	-	0	0	0	0	0	0	0	0	0	0	2	1198	0	0	0	0	0	0	0	0	0	0	0	0	0	0	1	175	0	0	0	0	0	0	0	0
2:17731981-17732231	AT2G42590,	1	+	0	0	1	1735	0	0	0	0	0	0	0	0	0	0	0	0	1	584	1	1738	0	0	0	0	0	0	0	0	0	0	0	0	0	0	0	0
2:17778726-17779968	AT2G42700,	3	+	0	0	0	0	0	0	0	0	0	0	0	0	0	0	1	255	0	0	0	0	0	0	0	0	0	0	2	21	0	0	0	0	0	0	0	0
2:17912413-17913392	AT2G43070,	5	-	0	0	0	0	0	0	0	0	2	326	0	0	0	0	1	792	0	0	0	0	0	0	0	0	0	0	0	0	0	0	0	0	0	0	0	0
2:17949313-17950007	AT2G43160,	4	+	0	0	0	0	0	0	1	511	0	0	0	0	1	1177	0	0	1	96	0	0	0	0	0	0	0	0	0	0	0	0	0	0	0	0	0	0
2:18147229-18147821	AT2G43800,	2	+	1	27	0	0	0	0	0	0	0	0	1	479	0	0	0	0	0	0	0	0	0	0	0	0	0	0	0	0	0	0	0	0	1	129	0	0
2:18206079-18206480	AT2G43970,	3	-	1	381	0	0	0	0	0	0	0	0	0	0	0	0	2	3658	0	0	0	0	0	0	0	0	0	0	0	0	0	0	0	0	0	0	0	0
2:18273412-18273948	AT2G44190,	3	+	0	0	0	0	0	0	0	0	0	0	0	0	0	0	0	0	0	0	1	5	0	0	0	0	0	0	0	0	0	0	0	0	2	52	0	0
2:18317415-18317888	AT2G44350,	3	+	0	0	0	0	0	0	0	0	0	0	0	0	0	0	0	0	0	0	0	0	0	0	0	0	0	0	0	0	0	0	0	0	0	0	3	936
2:1842711-1842935	AT2G05120,	2	+	0	0	0	0	0	0	0	0	0	0	0	0	0	0	2	230	0	0	0	0	0	0	0	0	0	0	0	0	0	0	0	0	1	73	0	0
2:18827655-18827866	AT2G45700,	1	-	0	0	0	0	0	0	0	0	0	0	0	0	0	0	1	318	0	0	0	0	0	0	0	0	0	0	0	0	2	104	0	0	0	0	0	0
2:18838348-18838552	AT2G45730,	2	-	0	0	0	0	0	0	0	0	0	0	0	0	2	272	0	0	0	0	0	0	0	0	0	0	0	0	0	0	0	0	0	0	0	0	1	189
2:19003901-19006328	n/a		-	0	0	0	0	0	0	0	0	0	0	0	0	1	1014	2	1192	0	0	0	0	0	0	0	0	0	0	0	0	0	0	0	0	0	0	0	0
2:19055559-19056417	AT2G46420,	3	+	0	0	0	0	0	0	0	0	0	0	0	0	0	0	0	0	0	0	1	57	0	0	0	0	0	0	0	0	0	0	0	0	2	286	0	0
2:19129866-19130224	AT2G46580,	3	-	0	0	0	0	0	0	0	0	0	0	0	0	0	0	0	0	1	57	1	118	0	0	0	0	0	0	0	0	1	163	0	0	0	0	0	0
2:19384879-19385066	AT2G47220,	1	+	0	0	0	0	0	0	0	0	0	0	0	0	0	0	0	0	1	5	0	0	0	0	0	0	0	0	0	0	2	29	0	0	0	0	0	0
2:19393804-19393980	AT2G47240,	1	+	0	0	0	0	0	0	1	435	0	0	0	0	0	0	0	0	0	0	0	0	0	0	0	0	0	0	0	0	0	0	0	0	1	2838	1	2638
2:19405829-19406046	AT2G47260,	2	-	0	0	0	0	0	0	0	0	0	0	0	0	0	0	0	0	0	0	0	0	0	0	0	0	0	0	0	0	1	91	2	210	0	0	0	0
2:19483331-19483555	AT2G47470,	2	+	0	0	1	1026	0	0	0	0	0	0	2	3261	0	0	0	0	0	0	0	0	0	0	0	0	0	0	0	0	0	0	0	0	0	0	0	0
2:19493608-19495038	AT2G47500,	7	+	0	0	2	159	0	0	0	0	0	0	0	0	0	0	0	0	0	0	0	0	0	0	0	0	0	0	0	0	0	0	0	0	0	0	1	300
2:19530181-19530546	AT2G47610,	2	+	0	0	1	3451	0	0	0	0	0	0	0	0	0	0	1	5594	0	0	0	0	0	0	1	950	0	0	0	0	0	0	0	0	0	0	0	0
2:19555252-19555614	AT2G47710,	2	-	0	0	0	0	1	619	0	0	0	0	0	0	0	0	0	0	0	0	0	0	0	0	0	0	0	0	0	0	0	0	2	1392	0	0	0	0
2:19680201-19680395	AT2G48120,	1	+	0	0	0	0	0	0	0	0	1	94	1	200	0	0	1	168	0	0	0	0	0	0	0	0	0	0	0	0	0	0	0	0	0	0	0	0
2:1993146-1993615	AT2G05440,	2	+	0	0	0	0	0	0	0	0	0	0	1	37814	2	13158	0	0	0	0	0	0	0	0	0	0	0	0	0	0	0	0	0	0	0	0	0	0
2:206522-206972	AT2G01460,	3	+	0	0	1	41	0	0	0	0	1	125	0	0	1	212	0	0	0	0	0	0	0	0	0	0	0	0	0	0	0	0	0	0	0	0	0	0
2:206522-207186	AT2G01460,	4	+	0	0	0	0	0	0	0	0	2	145	0	0	0	0	0	0	0	0	0	0	0	0	0	0	1	18	0	0	0	0	0	0	0	0	0	0
2:2360148-2361983	AT2G06050,	3	-	0	0	0	0	0	0	0	0	0	0	0	0	0	0	0	0	0	0	0	0	0	0	0	0	2	2241	0	0	1	319	0	0	0	0	0	0
2:269324-270061	AT2G01600,	4	+	0	0	0	0	0	0	0	0	0	0	1	608	0	0	0	0	0	0	0	0	0	0	0	0	0	0	0	0	0	0	0	0	2	392	0	0
2:2925886-2926524	AT2G07050,	3	+	0	0	0	0	0	0	1	463	0	0	0	0	0	0	0	0	0	0	0	0	0	0	0	0	0	0	0	0	0	0	0	0	1	456	1	437
2:3054212-3055105	AT2G07360,	3	-	0	0	0	0	0	0	0	0	0	0	0	0	0	0	1	973	0	0	0	0	0	0	0	0	0	0	0	0	0	0	0	0	0	0	2	403
2:4481464-4481790	AT2G11225,	0	+	0	0	0	0	0	0	0	0	0	0	3	1548	0	0	0	0	0	0	0	0	0	0	0	0	0	0	0	0	0	0	0	0	0	0	0	0
2:4485015-4493960	n/a		+	0	0	0	0	0	0	0	0	0	0	0	0	0	0	1	6	0	0	0	0	1	0	0	0	0	0	0	0	0	0	0	0	1	4	0	0
2:4485020-4486649	n/a		+	0	0	0	0	0	0	0	0	0	0	0	0	0	0	3	10	0	0	0	0	0	0	0	0	0	0	0	0	0	0	0	0	0	0	0	0
2:5539702-5540008	AT2G13360,	2	+	0	0	0	0	0	0	0	0	0	0	0	0	0	0	0	0	0	0	0	0	0	0	3	15459	0	0	0	0	0	0	0	0	0	0	0	0
2:5552340-5552851	AT2G13370,	3	-	0	0	0	0	0	0	0	0	0	0	0	0	0	0	0	0	0	0	0	0	0	0	0	0	0	0	0	0	0	0	2	253	1	186	0	0
2:5553145-5554356	AT2G13370,	3	-	0	0	0	0	0	0	0	0	0	0	1	494	0	0	0	0	0	0	0	0	0	0	0	0	0	0	0	0	0	0	0	0	2	185	0	0
2:5639297-5639782	AT2G13540,	2	+	0	0	0	0	0	0	0	0	0	0	0	0	0	0	0	0	0	0	0	0	0	0	3	204	0	0	0	0	0	0	0	0	0	0	0	0
2:6042619-6042870	AT2G14260,	2	-	0	0	0	0	0	0	0	0	0	0	0	0	0	0	1	258	0	0	0	0	0	0	0	0	0	0	0	0	0	0	0	0	2	242	0	0
2:6301154-6301885	AT2G14720,	4	-	0	0	0	0	0	0	0	0	1	257	0	0	0	0	0	0	0	0	0	0	0	0	0	0	0	0	0	0	0	0	0	0	2	246	0	0
2:6618367-6618772	AT2G15240,	0	-	0	0	0	0	0	0	1	13	0	0	0	0	0	0	1	31	0	0	0	0	0	0	0	0	0	0	0	0	0	0	1	26	0	0	0	0
2:669320-671402	n/a		-	0	0	0	0	0	0	0	0	0	0	1	66	0	0	1	93	0	0	0	0	0	0	1	114	0	0	0	0	0	0	0	0	0	0	0	0
2:7129285-7129571	AT2G16440,	2	-	0	0	0	0	0	0	0	0	2	118	0	0	0	0	0	0	0	0	0	0	0	0	0	0	0	0	0	0	0	0	0	0	1	155	0	0
2:7201172-7201317	AT2G16600,	1	+	0	0	0	0	0	0	0	0	0	0	0	0	0	0	0	0	0	0	0	0	0	0	0	0	0	0	0	0	0	0	0	0	3	7384	0	0
2:7928225-7928546	AT2G18220,	2	+	0	0	0	0	0	0	0	0	0	0	0	0	1	172	0	0	0	0	0	0	0	0	1	33	0	0	0	0	0	0	0	0	1	68	0	0
2:8458797-8458997	AT2G19520,	2	+	0	0	0	0	0	0	0	0	0	0	0	0	1	591	1	781	0	0	0	0	0	0	0	0	0	0	0	0	0	0	0	0	1	487	0	0
2:8476925-8477280	AT2G19590,	1	-	0	0	0	0	0	0	0	0	1	1034	0	0	0	0	2	5262	0	0	0	0	0	0	0	0	0	0	0	0	0	0	0	0	0	0	0	0
2:8492314-8492459	AT2G19640,	1	+	0	0	0	0	0	0	0	0	1	98	1	243	1	172	0	0	0	0	0	0	0	0	0	0	0	0	0	0	0	0	0	0	0	0	0	0
2:8517037-8517198	AT2G19760,	1	-	0	0	0	0	1	1133	0	0	0	0	0	0	0	0	1	3378	0	0	0	0	0	0	0	0	0	0	0	0	0	0	0	0	1	1517	0	0
2:8592831-8593533	AT2G19900,	5	-	0	0	0	0	0	0	0	0	0	0	0	0	3	119	0	0	0	0	0	0	0	0	0	0	0	0	0	0	0	0	0	0	0	0	0	0
2:8616926-8617186	AT2G19950,	2	-	0	0	0	0	0	0	0	0	0	0	0	0	0	0	0	0	0	0	0	0	1	80	0	0	0	0	2	68	0	0	0	0	0	0	0	0
2:8650728-8651232	AT2G20050,	2	-	0	0	0	0	0	0	0	0	1	123	0	0	0	0	0	0	0	0	0	0	0	0	0	0	0	0	0	0	0	0	0	0	1	251	1	221
2:8659532-8660374	AT2G20060,	3	+	0	0	0	0	0	0	0	0	0	0	0	0	0	0	0	0	0	0	0	0	1	68	2	125	0	0	0	0	0	0	0	0	0	0	0	0
2:8716985-8717589	AT2G20190,	3	-	0	0	0	0	1	244	1	261	0	0	0	0	0	0	0	0	0	0	0	0	0	0	1	265	0	0	0	0	0	0	0	0	0	0	0	0
2:8857206-8857575	AT2G20570,	2	-	0	0	1	279	0	0	2	411	0	0	0	0	0	0	0	0	0	0	0	0	0	0	0	0	0	0	0	0	0	0	0	0	0	0	0	0
2:8980404-8980783	AT2G20860,	1	+	0	0	0	0	0	0	0	0	0	0	0	0	0	0	0	0	0	0	0	0	0	0	0	0	0	0	0	0	3	356	0	0	0	0	0	0
2:9103721-9105923	n/a		-	0	0	0	0	0	0	0	0	0	0	2	467	0	0	0	0	0	0	0	0	0	0	0	0	0	0	0	0	0	0	1	341	0	0	0	0
2:9154864-9155031	AT2G21390,	1	+	0	0	0	0	0	0	0	0	0	0	0	0	0	0	1	2499	0	0	0	0	0	0	0	0	0	0	0	0	0	0	1	1251	0	0	1	1006
2:9217198-9217826	AT2G21520,	4	+	0	0	0	0	0	0	0	0	2	554	0	0	0	0	0	0	0	0	0	0	0	0	1	564	0	0	0	0	0	0	0	0	0	0	0	0
2:9298667-9298975	AT2G21800,	2	+	0	0	0	0	0	0	0	0	0	0	0	0	3	78	0	0	0	0	0	0	0	0	0	0	0	0	0	0	0	0	0	0	0	0	0	0
2:9434102-9434791	AT2G22190,	4	-	0	0	0	0	0	0	0	0	2	542	0	0	0	0	0	0	0	0	1	202	0	0	0	0	0	0	0	0	0	0	0	0	0	0	0	0
2:9581506-9582430	AT2G22540,	5	+	0	0	0	0	0	0	0	0	0	0	0	0	0	0	2	1643	0	0	0	0	0	0	1	2610	0	0	0	0	0	0	0	0	0	0	0	0
2:9690864-9691074	AT2G22780,	2	-	0	0	0	0	0	0	0	0	0	0	3	1097	0	0	0	0	0	0	0	0	0	0	0	0	0	0	0	0	0	0	0	0	0	0	0	0
2:9754141-9786511	n/a		+	0	0	0	0	0	0	0	0	0	0	0	0	0	0	0	0	0	0	1	666	0	0	0	0	0	0	0	0	0	0	0	0	0	0	2	490
2:9755759-9776516	n/a		+	0	0	0	0	0	0	0	0	0	0	0	0	3	514	0	0	0	0	0	0	0	0	0	0	0	0	0	0	0	0	0	0	0	0	0	0
2:9776175-9787547	n/a		+	0	0	0	0	0	0	0	0	0	0	0	0	0	0	0	0	0	0	0	0	0	0	3	2815	0	0	0	0	0	0	0	0	0	0	0	0
3:10033829-10034400	n/a		-	0	0	0	0	0	0	0	0	0	0	0	0	0	0	0	0	0	0	0	0	0	0	0	0	0	0	0	0	1	14	0	0	0	0	2	16
3:10035275-10036197	AT3G27185,	1	-	0	0	0	0	0	0	0	0	0	0	0	0	0	0	1	122	0	0	0	0	0	0	0	0	0	0	0	0	2	86	0	0	0	0	0	0
3:10085529-10085852	AT3G27300,	2	-	0	0	0	0	0	0	0	0	0	0	0	0	0	0	3	1766	0	0	0	0	0	0	0	0	0	0	0	0	0	0	0	0	0	0	0	0
3:101297-101622	AT3G01310,	1	-	0	0	0	0	0	0	0	0	0	0	1	884	0	0	2	792	0	0	0	0	0	0	0	0	0	0	0	0	0	0	0	0	0	0	0	0
3:1015772-1016566	AT3G03940,	4	-	0	0	0	0	0	0	0	0	0	0	1	580	1	519	0	0	0	0	0	0	0	0	1	394	0	0	0	0	0	0	0	0	0	0	0	0
3:10367316-10367514	AT3G27925,	1	-	0	0	0	0	0	0	1	446	2	40	0	0	0	0	0	0	0	0	0	0	0	0	0	0	0	0	0	0	0	0	0	0	0	0	0	0
3:10484775-10487122	n/a		-	1	6	0	0	0	0	1	12	0	0	0	0	0	0	0	0	0	0	0	0	0	0	0	0	0	0	0	0	0	0	1	20	0	0	0	0
3:10485962-10486264	n/a		-	0	0	0	0	0	0	0	0	0	0	0	0	0	0	0	0	0	0	0	0	0	0	0	0	2	0	0	0	0	0	0	0	0	0	1	22
3:10488628-10491156	n/a		-	0	0	1	17	1	10	0	0	0	0	0	0	0	0	0	0	0	0	0	0	0	0	0	0	0	0	0	0	0	0	1	14	0	0	0	0
3:10682492-10682630	AT3G28500,	1	+	0	0	0	0	0	0	0	0	0	0	0	0	0	0	0	0	0	0	0	0	0	0	0	0	0	0	0	0	1	1675	0	0	2	2085	0	0
3:107938-108214	AT3G01320,	1	+	0	0	0	0	0	0	0	0	0	0	0	0	0	0	2	373	0	0	0	0	0	0	0	0	0	0	0	0	0	0	0	0	0	0	1	211
3:11155096-11156304	AT3G29185,	5	-	0	0	0	0	0	0	0	0	0	0	0	0	0	0	0	0	0	0	0	0	0	0	0	0	0	0	0	0	0	0	0	0	1	192	2	226
3:1119331-1119617	AT3G04240,	2	-	0	0	0	0	0	0	0	0	1	327	0	0	0	0	0	0	0	0	1	140	0	0	0	0	0	0	0	0	0	0	0	0	1	446	0	0
3:11256210-11256446	AT3G29320,	1	+	0	0	1	1529	0	0	0	0	0	0	0	0	0	0	0	0	0	0	0	0	0	0	2	3547	0	0	0	0	0	0	0	0	0	0	0	0
3:1134445-1135342	AT3G04290,	2	-	0	0	0	0	0	0	1	583	0	0	0	0	0	0	0	0	0	0	0	0	0	0	0	0	0	0	0	0	0	0	1	2650	1	2737	0	0
3:11922788-11923903	AT3G30300,	6	-	0	0	0	0	0	0	1	176	0	0	0	0	0	0	0	0	0	0	0	0	0	0	0	0	0	0	0	0	2	204	0	0	0	0	0	0
3:11975556-11975792	AT3G30380,	1	+	0	0	0	0	0	0	1	58	0	0	0	0	0	0	1	280	0	0	0	0	0	0	0	0	0	0	0	0	0	0	0	0	1	169	0	0
3:1361360-1361949	AT3G04920,	2	+	1	1298	0	0	0	0	1	2329	0	0	0	0	0	0	0	0	0	0	0	0	0	0	0	0	0	0	0	0	1	2485	0	0	0	0	0	0
3:1462441-1462783	AT3G05165,	2	-	0	0	0	0	0	0	0	0	0	0	0	0	2	237	1	309	0	0	0	0	0	0	0	0	0	0	0	0	0	0	0	0	0	0	0	0
3:15513078-15513441	AT3G43600,	2	-	0	0	1	80	0	0	0	0	0	0	0	0	1	384	0	0	0	0	0	0	0	0	1	55	0	0	0	0	0	0	0	0	0	0	0	0
3:15664623-15664992	AT3G43810,	1	-	0	0	0	0	0	0	0	0	0	0	0	0	1	2244	0	0	0	0	0	0	1	403	0	0	0	0	0	0	0	0	0	0	1	1883	0	0
3:15988319-15994858	n/a		+	0	0	0	0	0	0	1	763	0	0	0	0	0	0	0	0	0	0	0	0	0	0	0	0	0	0	0	0	0	0	0	0	2	2009	0	0
3:1600086-1600597	AT3G05520,	3	+	0	0	0	0	1	159	0	0	0	0	1	474	0	0	1	522	0	0	0	0	0	0	0	0	0	0	0	0	0	0	0	0	0	0	0	0
[truncated: 3,239 more rows]

## Sheet: Suplementart Table 3 B
Supplementary Table 3 B. RNA-seq results obtained for all circRNAs in R+ (supported by at least 2 back-spliced reads) in 2 independent biological replicates. The circRNAs confirmed in the PCR experiment are shown in blue; see Figure 1.
				Number of raw back-spliced reads
				Seedling				Root				Leaf				Flower
circRNA_ID	gene_id	number of exons	strand	circ_Seq1	circ_Seq2	circ_Seq3	circ_Seq4	circ_Seq1	circ_Seq2	circ_Seq3	circ_Seq4	circ_Seq1	circ_Seq2	circ_Seq3	circ_Seq4	circ_Seq1	circ_Seq2	circ_Seq3	circ_Seq4
5:1106879-1107381	AT5G04090,	1	-	64	118	144	150	150	262	303	417	39	93	179	202	129	170	323	274
1:382803-383130	AT1G02080,	2	+	19	45	29	31	28	66	59	92	23	29	39	46	28	41	45	50
2:19672192-19672380	AT2G48100,	1	+	12	38	21	41	46	60	70	88	4	22	31	17	17	37	62	36
1:30349032-30349237	AT1G80750,	1	+	6	23	9	15	22	33	15	11	3	14	10	4	8	35	22	23
2:16614068-16615133	AT2G39810,	2	+	5	8	6	10	8	24	12	20	1	10	6	12	11	11	11	14
2:17272368-17272938	AT2G41440,	3	+	6	4	7	9	7	12	8	14	0	2	6	13	10	10	28	27
2:14529841-14530023	AT2G34460,	1	+	6	15	8	14	2	1	0	2	7	11	32	22	4	7	6	10
3:3172073-3172253	AT3G10260,	1	-	2	4	8	3	8	12	4	13	1	3	7	2	4	11	4	5
1:3674466-3675958	AT1G11000,	5	-	0	3	3	2	0	2	3	0	0	0	0	0	4	5	17	4
4:13026572-13027129	AT4G25500,	1	+	4	4	2	0	4	5	3	5	0	1	0	2	2	4	5	2
2:4485015-4486252	n/a		+	67	114	139	188	90	113	455	504	65	100	323	368	67	93	121	107
4:4196362-4197112	AT4G07390,	4	+	40	71	118	133	74	148	157	229	30	68	124	131	79	144	191	189
2:4485096-4486252	n/a		+	30	67	60	70	57	59	305	374	32	99	226	219	23	33	60	46
4:15077028-15077410	AT4G30975,	2	+	11	25	39	30	131	164	500	660	3	10	35	22	0	3	14	6
1:12383203-12384469	n/a		-	21	19	90	88	150	186	120	175	0	12	0	20	53	81	178	138
1:12381927-12382805	n/a		-	23	20	100	112	45	100	106	117	7	9	14	25	75	98	172	153
2:13271934-13272117	AT2G31141,	1	-	0	0	91	0	63	16	173	192	20	8	101	0	53	0	274	181
Pt:376-579	n/a		-	24	0	181	170	0	0	0	0	0	0	215	223	0	0	31	35
5:3005360-3015098	n/a		+	20	24	33	17	38	27	74	94	13	10	38	35	25	40	45	52
1:12383203-12384363	n/a		-	14	8	37	39	47	55	64	87	3	5	22	24	23	25	63	50
2:4485020-4486252	n/a		+	13	22	21	33	17	23	110	111	6	16	61	74	9	9	15	22
4:9044498-9044699	AT4G15955,	1	-	17	32	27	34	45	68	0	0	14	35	56	66	19	35	36	31
3:10035109-10036431	n/a		-	5	6	6	22	39	82	32	30	0	0	0	1	67	102	36	75
1:5297967-5298107	AT1G05163,AT1G15405,	1	+	0	0	0	0	0	0	402	0	0	0	0	0	0	0	0	0
3:19094437-19095353	AT3G51460,	4	+	12	21	29	18	16	30	27	33	4	13	27	28	13	17	42	20
1:29954420-29955106	AT1G79610,	5	-	14	15	10	4	23	24	29	60	3	7	22	18	16	23	38	34
1:12195268-12196524	AT1G33615,	3	-	9	15	15	33	23	60	28	28	3	12	9	11	10	18	26	30
3:22942458-22942716	AT3G61960,	1	-	10	9	13	19	14	20	42	55	7	13	29	21	11	7	22	22
3:11155468-11155611	AT3G29185,	1	-	10	29	30	15	6	8	2	6	10	26	30	20	29	43	24	23
1:5297892-5298178	AT1G05163,	1	+	0	0	18	11	0	0	73	60	0	0	40	33	0	0	0	43
5:7951290-7951442	AT5G23580,	1	-	5	9	6	12	30	48	29	39	4	7	2	7	12	15	31	20
5:26792958-26793181	AT5G67130,	1	+	6	7	17	16	9	17	30	36	4	9	11	11	12	10	24	32
4:1318907-1476555	n/a		-	0	0	29	0	24	0	0	74	0	0	22	0	0	0	101	0
1:12195268-12196344	AT1G33615,	3	-	13	14	42	45	2	11	9	15	0	6	7	15	11	20	23	15
2:15910564-15910878	AT2G38020,	2	-	8	13	17	14	9	14	21	16	6	13	17	23	10	15	25	14
4:5059540-5060151	n/a		-	5	12	20	21	10	8	16	15	4	10	11	10	17	22	27	21
1:16912770-16913095	AT1G44790,	3	-	6	16	8	8	18	29	28	22	2	4	8	10	6	16	23	16
1:24047787-24047963	AT1G64720,	1	-	11	21	23	31	2	2	6	6	13	23	0	13	10	14	21	22
4:15518699-15518883	AT4G32120,	1	-	4	9	7	10	11	27	29	26	5	7	12	8	9	11	18	14
3:5195567-5195827	AT3G15380,	1	+	7	5	13	17	8	11	26	34	0	5	5	9	10	9	20	17
2:17954032-17954231	AT2G43180,	1	-	2	8	12	9	9	29	27	36	1	6	19	12	2	6	13	0
1:30373643-30373879	AT1G80830,	1	-	6	9	8	15	17	29	10	14	0	6	5	6	15	14	21	15
5:10070156-10070477	AT5G28060,	2	-	4	6	9	15	7	15	25	18	2	2	15	17	9	5	26	15
1:30090399-30090595	AT1G79990,	1	+	1	8	7	8	14	22	8	23	1	6	2	9	13	16	27	24
3:19094426-19095353	AT3G51460,	4	+	8	4	10	22	10	24	19	18	1	4	8	5	9	13	22	12
1:14160677-14160909	AT1G37130,	1	-	3	8	15	21	12	6	43	48	6	6	8	10	0	0	3	0
3:11289661-11291634	AT3G29390,	7	+	0	2	3	4	2	6	58	43	0	0	30	15	4	4	6	4
2:17224556-17224704	AT2G41310,AT2G09250,	1	+	0	0	0	0	0	0	0	0	0	0	52	71	0	0	57	0
1:12195268-12196544	AT1G33615,	3	-	0	6	5	0	41	71	27	16	0	2	0	1	0	3	2	5
3:8391219-8391932	AT3G23430,	2	-	0	2	1	3	25	40	51	48	0	2	3	2	1	0	0	0
1:12383203-12384513	n/a		-	0	0	3	1	36	46	45	33	0	1	2	1	2	2	3	2
2:8659532-8660567	AT2G20060,	4	+	7	18	10	14	17	13	18	14	0	4	2	2	9	10	18	18
1:17179610-17179940	AT1G45474,	2	+	3	30	20	19	0	0	0	0	5	8	14	11	12	8	20	20
4:7887111-7887618	n/a		-	5	10	0	6	0	0	0	0	14	30	43	60	0	0	0	0
Pt:419-556	ATCG00020,	1	+	0	26	16	0	0	0	0	0	6	68	14	24	2	0	4	4
1:7558475-7560288	AT1G21580,	6	-	6	8	12	21	9	14	9	8	2	13	5	15	6	10	8	15
1:11778554-11780741	n/a		+	2	7	4	6	6	63	7	8	0	4	0	0	10	34	5	2
3:20514580-20514863	AT3G55330,	2	-	9	26	20	12	0	0	0	0	6	15	19	21	2	9	19	0
1:28958745-28959371	AT1G77080,	3	+	2	7	17	19	3	11	5	10	0	4	5	6	8	13	31	16
3:16310118-16311208	n/a		+	5	6	1	1	13	46	11	21	0	3	2	2	7	13	13	10
1:14160668-14160909	AT1G37130,	1	-	4	0	13	17	4	5	32	40	0	6	11	17	0	1	0	0
5:6525092-6525754	AT5G19370,	3	-	5	7	8	14	6	28	13	13	0	5	7	5	7	5	10	7
5:23072415-23072808	AT5G57015,	3	+	1	8	6	10	6	10	9	14	2	9	6	12	5	16	13	12
1:5297961-5298107	AT1G05163,AT1G15405,	1	+	0	0	0	0	0	0	72	66	0	0	0	0	0	0	0	0
3:3339812-3340050	AT3G10690,	2	-	1	6	4	6	11	18	9	12	2	1	3	7	5	13	18	19
1:11778554-11779629	n/a		+	2	7	2	9	16	42	6	9	0	0	1	0	3	13	12	10
4:15267180-15267385	AT4G31480,	1	+	0	3	1	2	7	10	23	22	1	4	6	15	5	8	11	12
2:17737315-17737537	AT2G42600,	1	-	5	6	13	16	3	0	6	8	0	5	29	26	1	0	7	2
4:6526748-6527634	AT4G10570,	4	-	2	0	8	4	0	12	21	22	0	4	10	8	4	11	14	7
2:13563446-13563811	AT2G31902,	2	+	0	3	4	4	12	11	26	34	1	1	10	12	0	2	3	4
2:16613843-16615133	AT2G39810,	3	+	1	5	5	8	4	14	11	13	2	11	3	12	8	8	11	10
5:17620798-17621714	AT5G43822,	5	+	6	3	11	14	2	11	14	7	2	8	2	8	12	3	15	6
4:14961224-14961558	AT4G30690,	3	+	4	3	17	13	2	7	0	11	7	9	6	11	7	4	11	11
5:3074094-3074269	AT5G09870,	1	+	1	5	13	8	6	9	7	18	5	7	7	9	3	2	12	10
3:9495096-9495354	AT3G25940,	2	+	3	7	3	10	11	9	20	24	1	2	6	3	3	6	7	6
1:16797905-16798293	AT1G44170,	2	-	0	2	2	1	19	6	20	18	0	0	8	1	5	8	18	11
2:699062-699656	AT2G02570,	3	-	4	6	8	6	6	14	7	11	2	5	5	5	4	11	13	12
5:22218486-22218648	AT5G54680,	1	+	2	5	4	6	5	2	18	17	3	3	13	14	4	0	12	9
1:8323451-8324050	AT1G23440,	3	+	5	0	6	9	3	4	22	29	0	0	6	17	0	2	7	4
3:4283022-4283777	n/a		+	4	4	7	10	7	13	10	3	3	6	8	4	7	4	12	9
5:18770049-18770268	AT5G46280,	1	-	0	7	10	2	5	10	10	15	3	0	1	2	5	9	11	19
1:12197021-12199193	n/a		-	1	5	1	2	26	58	6	2	0	0	0	0	0	7	0	0
1:12381927-12384469	n/a		-	2	0	4	1	17	22	12	17	0	0	0	0	5	13	7	6
2:15502884-15503084	AT2G36910,	1	+	0	3	3	5	6	9	3	11	0	0	3	5	12	11	27	8
1:12170651-12170856	AT1G33560,	1	+	3	2	6	5	6	19	16	9	2	1	7	11	2	7	6	3
4:14961208-14961558	AT4G30690,	3	+	1	5	13	10	1	5	2	3	2	5	7	7	5	8	13	16
Pt:415-556	ATCG00020,	1	+	0	0	0	0	0	0	0	0	0	0	0	103	0	0	0	0
1:11875443-11875789	AT1G32790,	3	-	2	4	6	0	5	10	20	19	0	4	0	3	1	12	15	0
2:7244815-7245074	AT2G16700,	1	+	1	0	0	2	10	9	26	31	0	1	10	4	2	1	3	1
1:382373-383130	AT1G02080,	3	+	5	7	6	9	3	6	11	16	4	0	0	8	0	4	10	12
3:17953266-17954439	AT3G48470,	3	+	7	8	3	15	7	7	5	6	0	2	2	1	8	11	9	9
1:980778-981160	AT1G03860,	1	-	5	2	2	6	11	11	14	21	0	2	5	2	6	0	7	5
1:30312632-30312873	AT1G80640,	1	+	6	13	9	0	11	4	7	2	4	0	6	5	2	7	12	11
3:16310118-16311179	n/a		+	3	6	0	0	11	26	10	13	0	1	0	0	6	9	10	4
1:20295245-20296559	AT1G54370,	7	-	0	8	15	9	0	7	6	2	3	0	5	1	11	14	9	7
5:1134326-1134820	AT5G04140,	3	+	2	13	15	7	0	0	1	0	7	12	13	21	0	4	2	0
4:12480688-12481259	AT4G24020,	1	+	5	5	16	11	6	7	10	8	4	11	6	4	1	0	2	0
5:22038648-22038809	AT5G54270,	1	+	6	18	8	9	0	0	0	0	4	16	11	11	0	4	8	1
5:15262271-15262561	AT5G38212,	1	-	0	6	0	1	6	13	16	22	2	0	6	3	6	2	6	6
5:26389498-26390136	AT5G65970,	4	-	0	1	1	2	18	18	25	30	0	0	0	0	0	0	0	0
1:5239295-5239650	AT1G15215,	2	+	2	5	3	2	7	8	17	11	1	4	5	6	3	7	4	8
3:19594771-19595020	AT3G52870,	2	-	0	4	8	7	6	12	3	4	4	7	4	8	2	5	12	6
4:17179851-17180198	AT4G36360,	2	-	1	1	1	5	6	9	22	23	0	1	5	6	0	2	8	1
3:5399310-5399968	AT3G15950,	5	-	3	6	10	12	9	16	14	19	0	0	0	0	0	0	1	1
1:19410583-19410908	AT1G52150,	1	-	7	6	3	5	10	2	12	16	2	6	5	3	3	5	0	5
2:9240888-9241242	AT2G21590,	2	+	0	0	0	0	0	1	2	8	0	0	37	18	3	0	14	7
5:23231371-23231552	AT5G57350,	1	-	1	3	4	4	1	0	10	15	1	5	30	14	1	1	0	0
1:19523719-19524061	AT1G52410,	3	+	0	3	0	0	7	6	13	14	0	2	0	1	7	4	18	13
1:20062464-20063011	AT1G53730,	4	+	4	4	3	5	5	11	17	14	0	3	0	4	2	3	7	6
4:18540249-18540526	AT4G39980,	1	+	5	2	5	4	13	7	16	19	1	1	0	7	0	0	6	1
1:10832906-10833429	AT1G30580,	3	-	4	3	7	4	8	11	5	13	0	2	10	3	3	3	5	5
5:15025579-15025974	n/a		+	2	4	6	4	8	21	6	7	0	0	0	0	4	3	14	7
3:23412447-23413001	AT3G63400,	4	+	4	6	12	7	5	7	12	4	2	1	2	2	6	5	9	0
5:1678373-1678595	AT5G05610,	1	-	0	0	11	4	4	5	0	14	1	10	5	6	0	5	13	6
1:17237174-17237491	AT1G46480,	1	-	0	0	0	2	13	18	22	10	0	0	2	0	2	5	3	5
2:15502495-15502810	AT2G36910,	2	+	0	3	1	2	6	11	7	7	1	2	0	2	5	8	13	14
3:17447395-17447783	AT3G47350,	2	+	2	0	4	6	4	6	4	8	0	1	4	7	3	9	14	10
5:26092437-26092835	AT5G65290,	2	+	2	3	4	0	6	7	9	8	2	6	11	7	2	7	5	3
Pt:1114-1325	ATCG00020,	1	+	0	0	17	29	0	0	0	0	3	4	11	12	0	0	0	5
1:11627720-11628041	AT1G32240,	2	-	0	3	0	4	5	4	23	17	1	2	8	6	2	0	1	3
2:9690536-9690899	AT2G22780,	3	-	5	3	11	12	8	10	7	9	2	0	2	4	1	1	4	0
5:18424994-18426001	AT5G45472,	2	+	10	11	0	0	5	3	0	0	7	24	0	0	8	11	0	0
4:7887116-7887618	n/a		-	2	7	2	3	0	0	0	0	9	9	21	25	0	1	0	0
1:24047621-24047963	AT1G64720,	2	-	6	5	7	9	0	1	2	0	6	5	4	6	5	3	11	8
5:252762-252968	AT5G01670,	1	+	0	8	3	0	0	1	21	18	0	1	3	9	4	1	8	1
2:2230283-2230610	AT2G05830,	2	+	4	6	4	2	7	8	7	10	2	5	7	2	0	4	6	4
2:19278343-19278607	AT2G46920,	1	-	2	2	0	6	0	16	26	16	0	0	3	2	0	0	3	2
1:17890735-17890884	AT1G48410,	1	-	0	5	2	6	3	4	14	9	2	0	1	4	4	5	10	8
1:17903957-17904292	AT1G48430,	2	-	0	1	7	3	5	3	2	3	0	3	10	17	4	8	9	1
4:5239826-5240072	AT4G08290,	1	+	0	2	0	1	4	10	10	15	2	3	8	10	2	3	2	3
3:3339812-3340668	AT3G10690,	5	-	2	7	8	5	4	6	13	5	0	3	0	3	0	4	10	5
3:18230091-18230338	AT3G49180,	1	+	8	5	3	10	0	6	4	15	0	5	4	1	1	3	6	3
5:2522594-2523409	AT5G07910,	5	-	2	3	3	6	7	7	5	14	1	1	7	5	2	3	3	5
3:5544384-5544758	AT3G16340,	1	+	0	1	2	0	12	23	9	22	0	0	1	0	0	0	2	2
1:2206339-2206518	AT1G07180,	1	+	2	7	11	6	0	0	0	0	3	15	7	11	2	4	2	3
1:11875443-11875803	AT1G32790,	3	-	2	0	3	4	2	8	8	16	2	1	1	5	3	4	6	8
1:13538090-13538278	AT1G36160,	1	+	0	5	9	3	3	1	8	10	0	3	2	0	3	5	9	12
3:17154449-17154741	AT3G46590,	2	+	0	3	6	4	4	0	9	10	0	3	5	6	2	2	10	9
3:14202056-14202201	n/a		+	1	0	13	11	0	0	9	10	0	0	5	9	0	0	8	7
1:24048040-24048196	AT1G64720,	1	-	0	7	12	12	1	1	4	1	5	8	6	4	5	4	1	1
1:20413944-20414198	AT1G54680,	2	+	1	0	0	6	3	13	4	11	5	5	2	7	4	0	4	6
5:24296902-24297456	AT5G60410,	3	+	4	3	3	4	6	3	11	4	0	3	9	8	1	1	5	6
1:9670307-9670619	AT1G27760,	1	+	0	1	5	7	0	0	11	16	0	0	14	5	0	3	6	3
5:6598597-6599463	AT5G19550,	5	+	0	0	1	6	8	9	13	16	2	2	5	3	0	0	5	1
1:950404-951211	AT1G03780,	4	-	6	5	4	10	5	10	9	3	0	0	0	0	2	4	5	7
1:12381927-12382809	n/a		-	0	0	11	3	0	6	7	8	0	0	0	0	5	2	15	13
5:14739655-14741529	n/a		-	0	4	1	0	12	24	6	11	0	3	0	0	3	1	1	4
5:24870938-24871098	AT5G61940,	1	+	3	2	0	1	0	3	5	2	0	1	3	0	0	7	31	12
2:14798952-14799462	AT2G35110,	3	-	2	6	2	6	0	5	10	7	1	1	5	4	1	6	9	4
3:18285489-18285704	AT3G49310,	1	-	1	4	4	7	2	5	8	4	0	3	5	5	1	5	9	6
4:16311056-16311280	AT4G34050,	1	+	0	0	0	3	3	10	20	16	0	2	6	6	1	0	0	2
4:8187800-8188263	AT4G14200,	2	-	3	2	3	0	11	8	5	12	0	0	0	1	0	1	13	10
5:15381808-15384895	n/a		-	0	0	15	0	0	0	0	0	0	0	19	26	0	0	9	0
3:16805926-16806440	AT3G45770,	3	-	2	5	2	3	2	14	5	12	0	3	3	4	2	4	2	5
5:900654-901168	AT5G03560,	2	-	3	9	5	3	1	4	11	12	2	1	1	2	4	2	5	2
1:2707424-2707921	AT1G08550,	2	+	2	7	11	8	0	1	1	0	5	4	5	7	3	4	5	3
1:3536387-3536548	AT1G10670,	1	+	0	0	4	5	5	6	0	8	2	1	0	0	3	12	8	12
1:22582297-22584333	AT1G61240,	12	+	10	12	0	4	9	3	0	0	0	3	0	0	3	10	5	7
3:6141325-6141732	AT3G17920,	2	+	1	7	5	5	3	6	6	9	0	0	0	3	3	3	10	5
4:6662514-6664511	n/a		+	3	2	3	6	3	14	1	2	2	1	0	0	8	7	6	8
5:7883393-7883599	AT5G23405,	2	-	0	1	5	5	6	4	9	7	0	1	2	8	0	4	6	8
2:10321651-10321821	AT2G24260,	1	-	0	1	2	0	7	13	13	27	1	0	1	0	0	0	0	1
1:2828380-2828581	AT1G08830,	2	+	2	0	2	0	2	5	19	21	0	2	4	0	1	1	2	4
2:17138307-17138573	AT2G41100,	1	+	1	2	3	7	0	1	10	8	1	4	13	9	1	3	2	0
5:24228671-24228824	AT5G60170,	1	+	4	8	5	6	3	8	4	9	0	3	4	0	1	5	3	2
3:5566863-5572941	n/a		+	2	0	7	11	0	0	24	16	1	1	2	0	0	1	0	0
4:37274-37567	AT4G00100,	2	+	1	7	12	4	4	3	4	10	0	2	2	1	2	3	0	9
4:6664265-6664511	n/a		+	2	8	1	0	4	4	5	8	0	0	2	0	5	4	16	5
1:12195268-12196367	AT1G33615,	3	-	3	7	12	8	3	4	5	2	0	2	2	3	2	0	5	5
1:12599575-12600110	AT1G34460,	3	+	0	3	2	0	0	3	18	18	1	0	1	2	4	5	0	6
1:30059886-30064646	n/a		-	2	4	5	4	0	12	5	0	3	3	4	7	5	7	2	0
1:18067174-18067619	AT1G48850,	3	-	3	4	1	3	8	12	12	11	0	2	2	1	0	0	2	2
2:13271979-13272117	AT2G31141,	1	-	2	0	0	0	4	0	0	0	0	0	0	15	0	0	42	0
Pt:412-556	ATCG00020,	1	+	0	0	0	0	0	0	0	0	0	0	26	36	0	0	0	0
2:558254-558659	AT2G02170,	2	-	2	2	4	2	5	6	3	3	0	1	7	8	1	3	7	7
4:1472782-1476436	n/a		-	0	3	10	4	0	0	5	10	0	0	0	8	5	0	11	5
5:23072415-23072662	AT5G57015,	2	+	2	3	0	4	4	0	4	4	2	5	0	9	4	5	7	8
1:2655393-2655592	AT1G08420,	1	+	5	1	0	3	5	9	5	6	0	1	2	5	0	3	7	9
5:16823262-16824040	AT5G42080,	5	-	6	3	4	0	3	11	5	12	2	1	0	0	1	3	4	5
3:109182-109336	AT3G01320,	1	+	0	3	4	0	3	9	8	11	0	3	3	2	0	6	3	5
3:17173528-17174520	n/a		-	2	2	1	0	5	34	3	0	0	2	0	0	2	6	1	1
4:17241256-17241589	AT4G36530,	2	-	2	8	13	9	0	0	0	1	2	1	6	2	0	3	5	7
1:2678103-2678754	AT1G08465,	4	+	4	7	3	4	0	0	0	0	0	5	4	10	5	5	6	5
1:20290944-20291230	AT1G54360,	2	+	2	1	4	1	1	4	11	6	0	0	2	3	1	4	11	7
1:19992256-19992794	AT1G53580,	3	-	5	0	3	0	3	7	12	16	0	0	5	4	0	1	2	0
2:6811560-6811848	AT2G15620,	1	+	3	5	3	1	2	1	8	21	0	0	6	7	0	1	0	0
3:1263468-1263677	AT3G04650,	1	+	3	12	10	4	3	0	2	0	0	1	4	3	0	5	9	2
2:18927927-18928130	AT2G46020,	1	+	0	2	1	4	2	6	5	9	0	1	3	1	5	3	6	9
3:14230899-14232267	AT3G42050,	6	-	3	4	2	1	1	8	5	6	1	2	6	4	2	0	9	3
5:14738507-14739294	AT5G37240,	4	-	5	2	0	3	1	11	5	3	0	3	0	0	3	13	3	5
1:29955203-29956360	AT1G79610,	7	-	7	0	1	0	0	9	4	7	0	4	0	4	0	6	11	4
3:18167710-18168061	AT3G49010,	2	-	3	2	5	1	6	6	5	11	0	0	6	1	0	0	8	3
1:11143690-11144015	AT1G31180,	2	-	6	6	6	4	0	2	0	3	0	0	4	2	6	2	8	7
5:3632738-3633022	AT5G11380,	1	+	4	6	2	5	0	4	5	4	0	0	3	3	5	3	8	4
3:3172328-3172512	AT3G10260,	1	-	1	1	5	6	2	6	3	2	2	2	3	1	0	8	6	8
4:8218498-8218778	AT4G14270,	1	+	2	0	0	0	2	1	8	20	0	2	11	8	0	0	0	2
1:1631579-1631842	AT1G05520,	1	-	1	0	0	1	6	22	8	1	0	1	0	0	4	8	0	3
1:1872226-1872888	AT1G06150,	3	-	4	3	5	4	9	9	3	8	0	0	3	1	1	0	3	2
1:30312632-30313101	AT1G80640,	2	+	2	6	12	9	1	2	4	2	0	1	1	2	4	5	2	2
1:8611523-8611752	AT1G24280,	1	+	4	5	0	2	6	14	8	6	0	1	3	2	0	1	3	0
5:14892940-14893314	AT5G37500,	2	-	1	0	1	0	0	3	16	28	0	0	3	3	0	0	0	0
4:1318907-1472997	n/a		-	0	0	0	0	25	0	0	30	0	0	0	0	0	0	0	0
1:10498644-10499244	AT1G29965,AT1G29970,	3	-	3	3	0	2	5	20	4	1	0	0	0	0	9	6	0	1
1:25230632-25230794	AT1G67340,	1	+	0	3	3	0	7	4	7	7	2	4	3	6	2	0	0	6
2:8650728-8651232	AT2G20050,	2	-	2	6	7	5	0	7	6	5	0	1	2	5	1	0	3	4
2:14530097-14530489	AT2G34460,	1	+	6	3	11	6	1	0	0	1	2	4	4	5	1	2	3	5
3:8474520-8475079	AT3G23600,	3	+	0	2	0	3	4	8	0	19	3	3	3	3	1	0	5	0
4:7110184-7110409	AT4G11820,	2	-	1	5	3	4	1	2	3	0	0	0	0	0	4	5	11	15
4:17180311-17180619	AT4G36360,	2	-	0	8	1	2	3	5	5	4	1	2	0	3	4	8	5	3
1:28191514-28191900	AT1G75100,	3	-	4	5	3	5	0	0	0	0	3	5	10	6	0	3	4	6
1:24490431-24491017	AT1G65840,	3	+	4	5	1	0	0	8	2	16	1	2	7	5	0	0	1	2
3:9275472-9275627	AT3G25540,	1	+	2	3	3	7	5	12	4	6	0	3	1	1	2	0	0	4
5:3005360-3015074	n/a		+	2	0	2	1	5	0	16	11	0	0	0	3	2	0	5	6
5:19815835-19816283	AT5G48880,	3	-	3	4	0	2	0	0	0	2	2	0	3	5	5	4	13	10
2:2925886-2926336	AT2G07050,	2	+	2	2	4	4	4	11	5	5	0	3	1	6	0	2	0	4
3:16858690-16859078	AT3G45850,	3	-	0	7	2	4	4	3	2	3	2	2	1	4	0	9	3	7
1:19410385-19410908	AT1G52150,	2	-	0	2	0	4	4	8	6	8	0	2	0	1	3	3	5	6
2:7600495-7601393	n/a		+	5	0	2	4	2	0	0	0	0	0	1	2	3	5	18	10
5:6524750-6525754	AT5G19370,	4	-	3	1	3	2	3	6	2	8	0	0	0	1	3	3	10	7
5:24598413-24599125	AT5G61140,	3	+	4	2	5	2	3	6	0	4	0	3	1	3	2	5	5	7
1:8335056-8335303	AT1G23480,	1	+	2	3	7	6	2	10	1	11	1	3	0	1	0	1	4	0
2:13182778-13183082	AT2G30980,	2	-	0	1	3	8	3	5	6	12	0	2	3	5	0	2	0	2
4:9639334-9639719	AT4G17150,	2	+	2	2	6	1	2	6	12	5	0	2	0	1	4	2	3	3
4:12657713-12657875	AT4G24490,	1	-	1	5	3	3	4	3	4	6	0	2	2	1	1	5	8	3
5:6022253-6022516	AT5G18230,	1	-	0	0	3	3	1	0	0	4	1	4	2	5	5	5	9	9
4:478156-478319	AT4G01100,	1	+	2	3	1	6	1	8	4	3	0	2	3	1	3	7	2	4
4:9013977-9014253	AT4G15880,	2	+	0	0	4	3	6	3	2	7	0	2	3	5	5	1	3	6
4:16257474-16257807	AT4G33910,	2	-	0	2	5	1	4	5	2	12	0	4	5	1	2	3	4	0
5:1252684-1253134	AT5G04430,	2	-	1	4	3	8	1	1	0	10	0	2	2	4	0	4	3	7
5:15025927-15026752	n/a		+	0	5	1	4	5	13	7	4	0	1	0	1	0	2	7	0
4:11562071-11562312	AT4G21760,	2	+	0	2	0	0	9	13	10	14	0	0	2	0	0	0	0	0
3:7003071-7003743	AT3G20060,	4	-	0	10	5	4	6	3	1	0	0	2	0	0	1	3	13	1
4:12663940-12664287	AT4G24520,	2	-	2	1	2	1	4	2	5	8	1	5	3	1	1	5	3	5
3:3339812-3340244	AT3G10690,	3	-	2	3	5	1	3	5	5	5	0	0	1	3	0	2	11	3
1:29661166-29661440	AT1G78900,	2	+	0	2	2	4	1	6	8	5	0	1	5	5	2	0	2	5
2:19600137-19601439	AT2G47860,	1	+	1	2	0	0	15	18	3	4	0	0	0	0	2	2	0	1
4:13798788-13800094	AT4G27640,	7	-	2	2	3	7	1	7	2	4	0	4	0	0	3	5	5	3
4:15969248-15969651	AT4G33090,	2	-	0	5	4	3	4	4	0	6	0	4	4	2	2	2	4	4
3:1621792-1622122	AT3G05590,	2	+	0	6	1	3	4	1	5	8	0	1	2	4	0	2	7	4
1:23038059-23038326	AT1G62310,	2	-	1	0	4	0	3	2	8	13	0	2	0	2	2	3	3	4
1:23457451-23457750	AT1G63240,	2	-	2	0	1	3	2	3	4	0	0	0	0	3	4	8	6	11
3:6822490-6822721	AT3G19640,	1	+	1	0	2	0	2	2	10	17	0	0	0	2	0	2	3	6
5:3632733-3633022	AT5G11380,	1	+	6	4	7	4	1	0	1	4	2	0	2	2	0	3	6	5
1:21091768-21091960	AT1G56340,	1	-	1	1	5	0	3	4	9	11	0	1	5	3	0	0	1	3
2:134091-134273	AT2G01250,	1	-	4	1	4	1	0	2	7	7	0	0	9	4	0	0	4	4
1:20290789-20291230	AT1G54360,	2	+	0	6	4	3	1	2	1	10	3	0	1	2	1	3	5	4
2:10418493-10418653	AT2G24520,	1	+	5	0	6	0	2	3	3	5	1	5	4	1	3	2	3	3
3:16314559-16315697	n/a		+	0	0	0	0	3	40	0	0	0	0	0	0	0	3	0	0
3:23405523-23406369	n/a		+	0	6	9	3	0	0	0	0	5	4	6	2	0	3	4	4
1:19116497-19116667	AT1G51540,	1	+	1	0	5	0	5	3	6	14	0	0	2	0	0	0	8	2
3:11165463-11165846	AT3G29200,	2	-	0	2	2	5	6	1	5	4	0	0	2	1	5	0	6	6
5:15023284-15023598	AT5G37793,	1	+	3	4	2	5	5	13	4	6	0	0	0	0	1	2	0	0
5:19326160-19326446	AT5G47690,	2	+	1	1	3	4	3	8	3	4	1	2	0	0	3	3	5	4
2:14355448-14356826	AT2G33980,	2	-	1	0	1	0	0	0	11	9	0	0	8	10	0	0	0	5
1:11269590-11270042	AT1G31480,	3	+	0	1	0	3	0	5	10	8	0	0	3	5	2	1	3	3
1:16797519-16797830	AT1G44170,	2	-	0	1	1	1	2	9	6	9	0	1	1	3	1	2	4	3
2:15511157-15511363	AT2G36930,	1	-	5	4	1	1	0	4	6	9	0	1	1	0	2	3	7	0
5:2031427-2031768	AT5G06610,	1	+	0	1	0	0	0	1	3	4	0	0	23	8	3	1	0	0
2:19621356-19621706	AT2G47940,	3	-	2	4	3	4	2	4	0	2	1	0	2	1	0	12	2	5
1:26421849-26422049	AT1G70160,	1	+	1	3	0	3	4	0	7	8	0	0	7	4	0	0	6	1
1:12598733-12600110	AT1G34460,	5	+	0	2	0	3	0	16	4	3	0	0	0	0	5	8	0	2
1:24047381-24047963	AT1G64720,	3	-	2	3	5	3	0	0	0	4	1	3	9	4	4	0	4	1
1:29345983-29346759	AT1G78040,	2	+	0	3	2	0	7	3	4	7	0	1	1	4	1	3	2	5
2:206522-206831	AT2G01460,	2	+	2	0	0	8	5	3	5	0	1	0	4	0	3	3	6	3
2:11311833-11312365	AT2G26590,	3	-	0	0	0	3	1	7	3	1	1	0	2	5	2	2	5	11
3:7609637-7610205	AT3G21610,	3	-	2	0	4	0	5	0	11	8	0	0	2	3	2	0	4	2
5:6180209-6180926	AT5G18590,	4	-	0	6	3	0	1	0	0	0	1	2	1	4	6	5	7	7
5:17580616-17580848	AT5G43750,	2	-	3	4	2	0	1	1	0	0	3	4	3	3	6	4	7	2
4:7455225-7455377	AT4G12610,	1	+	2	1	2	3	5	6	3	0	0	1	3	5	0	2	8	2
1:7879089-7880684	AT1G22300,	5	-	0	5	0	3	8	8	4	0	1	2	3	3	2	0	0	3
2:11291531-11291676	AT2G26550,	1	-	5	3	0	2	5	7	2	2	0	4	2	1	1	6	0	2
2:17699176-17700174	AT2G42500,	4	-	3	6	3	3	2	7	0	3	0	1	1	0	2	4	4	3
4:18242430-18242645	AT4G39170,	1	+	0	2	1	1	3	3	2	7	0	0	2	1	2	6	12	0
5:4653717-4653899	AT5G14430,	1	+	1	3	3	5	2	5	4	5	0	0	0	3	1	7	3	0
1:5297910-5298107	AT1G05163,AT1G15405,	1	+	1	1	5	7	0	0	10	3	0	0	3	4	0	1	5	2
2:952466-952954	AT2G03150,	1	+	6	3	5	5	3	3	1	1	0	1	2	2	0	2	0	8
4:14130385-14130652	AT4G28600,	1	+	1	3	3	0	6	7	5	3	0	2	2	1	0	1	2	6
1:22315622-22315852	AT1G60590,	1	-	2	3	2	2	1	2	10	14	0	0	2	1	0	0	0	3
1:3347021-3347437	AT1G10200,	3	-	2	1	1	2	5	2	5	5	0	0	0	1	2	3	7	5
3:1259771-1260301	AT3G04630,	3	+	0	1	4	3	6	4	6	3	2	0	0	1	1	1	5	4
3:17305908-17306122	AT3G46970,	1	-	0	5	2	4	0	1	1	0	1	4	11	3	4	4	0	1
4:6271585-6271974	AT4G10030,	3	-	0	0	2	2	0	1	5	3	3	1	1	0	2	8	7	6
2:13520787-13521178	AT2G31800,	2	-	3	1	0	2	8	8	6	3	1	0	2	1	0	3	2	1
3:16310126-16311208	n/a		+	0	1	2	1	0	14	4	5	0	0	0	0	0	5	3	6
1:329781-329924	AT1G01950,	1	+	0	0	3	4	2	3	1	4	0	2	2	0	6	0	7	6
1:30349032-30349921	AT1G80750,	3	+	2	7	3	2	2	1	4	5	0	0	2	0	4	1	5	2
2:2229911-2230199	AT2G05830,	2	+	0	2	3	5	4	5	3	4	0	0	0	0	2	1	6	5
3:17430-17648	AT3G01060,	1	-	0	6	3	3	0	0	2	2	1	2	4	6	2	2	4	3
3:1119331-1119617	AT3G04240,	2	-	1	0	0	3	1	4	6	6	0	0	3	3	3	4	1	5
3:2106455-2106770	AT3G06670,	2	-	0	1	2	4	2	6	2	5	0	1	1	3	3	4	2	4
3:21409007-21409295	AT3G57800,	2	-	0	2	6	5	3	1	2	2	2	4	4	3	2	4	0	0
5:26255439-26255580	AT5G65670,	1	+	0	3	2	2	6	8	2	3	0	0	2	0	1	6	5	0
1:191341-191692	AT1G01520,	2	+	2	9	10	0	0	1	0	0	0	0	7	8	0	1	1	1
4:13284307-13284531	AT4G26220,	1	+	6	0	0	0	8	6	7	8	0	1	1	0	0	1	2	0
1:18574406-18574758	AT1G50140,	2	-	1	1	4	4	1	5	1	7	0	2	6	2	0	0	4	2
Pt:466-618	ATCG00020,	1	-	6	1	7	13	0	0	0	0	0	3	4	6	0	0	0	0
3:2841474-2841896	AT3G09260,	2	-	1	1	0	2	5	12	7	12	0	0	0	0	0	0	0	0
1:5038911-5039048	AT1G14670,	1	+	2	4	0	3	4	2	1	4	0	1	3	3	1	1	8	2
2:14352472-14356826	AT2G33980,	5	-	1	1	2	3	0	0	7	11	0	1	2	4	2	1	2	2
4:7685550-7685745	AT4G13250,	1	-	0	4	4	2	0	0	0	0	1	3	3	3	1	5	5	8
4:9639330-9639719	AT4G17150,	2	+	0	1	0	1	2	1	9	2	3	0	4	0	3	7	6	0
5:8350547-8352822	AT5G24450,	7	+	4	4	0	2	3	5	2	2	0	3	0	1	3	7	0	3
5:19816023-19816283	AT5G48880,	2	-	0	1	0	2	0	2	0	1	0	1	1	4	2	3	14	8
1:21165731-21166281	AT1G56500,	3	+	2	3	3	8	1	0	0	0	3	3	3	2	0	3	5	3
1:29862000-29862276	AT1G79380,	2	+	1	1	2	3	5	3	3	6	1	1	3	3	0	3	0	4
2:15752935-15753847	AT2G37540,	2	-	0	9	5	0	1	0	0	0	0	5	12	6	0	1	0	0
3:23427993-23428178	AT3G63450,	1	-	1	1	0	3	5	9	7	6	0	0	1	2	0	3	0	1
5:13463301-13464016	AT5G35200,	4	-	2	0	0	0	5	4	8	6	0	0	2	1	0	4	7	0
5:17990613-17990911	AT5G44600,	2	+	4	2	4	5	0	0	1	3	0	2	3	3	1	2	4	4
1:5576753-5577088	AT1G16300,	2	+	0	0	0	0	2	5	6	14	0	0	5	1	0	1	2	2
2:8435740-8435888	AT2G19470,	1	-	0	3	2	2	2	6	2	3	0	2	2	2	0	3	3	6
5:19344592-19344824	AT5G47760,	2	-	0	3	1	1	3	5	4	4	0	1	1	0	0	4	2	9
1:5297937-5298178	AT1G05163,	1	+	0	0	0	0	0	0	0	0	0	0	19	0	0	0	19	0
5:8381929-8382253	AT5G24530,	1	+	1	1	0	1	0	1	2	4	0	0	17	10	0	0	1	0
1:5297903-5298178	AT1G05163,	1	+	0	0	3	3	2	0	6	5	1	0	0	11	0	0	0	7
2:1377155-1377360	AT2G04100,	1	-	2	2	2	1	1	5	14	9	0	0	2	0	0	0	0	0
1:5774332-5775209	AT1G16880,	5	+	3	1	5	3	0	0	3	0	0	0	0	3	2	1	9	7
1:9296053-9296223	AT1G26830,	1	+	1	0	2	5	0	3	3	3	0	1	1	3	4	4	5	2
1:10075360-10075858	AT1G28670,	2	-	3	5	7	7	0	0	0	0	0	4	4	2	1	1	1	2
1:11459003-11459938	AT1G31910,	5	+	0	5	2	0	0	1	10	7	0	1	1	2	2	1	4	1
1:20809425-20809584	AT1G55690,	1	-	0	1	3	1	4	5	3	6	0	0	4	1	1	5	0	3
2:7870734-7871003	AT2G18100,	2	+	0	2	2	1	2	6	2	7	0	3	1	0	1	7	3	0
2:13867526-13868386	AT2G32700,	4	+	4	2	0	0	4	5	3	0	2	2	0	2	3	4	6	0
3:3340127-3340668	AT3G10690,	3	-	0	4	6	5	7	2	4	1	0	0	0	1	1	0	5	1
3:6927024-6928252	AT3G19910,	4	+	2	1	0	4	3	5	4	8	0	1	1	1	2	3	0	2
3:11922788-11923075	AT3G30300,	2	-	1	1	4	1	3	2	5	3	0	3	1	1	1	2	4	5
4:6663195-6664511	n/a		+	3	0	0	0	0	10	2	2	0	2	0	0	3	3	4	8
1:6094338-6094605	AT1G17720,	2	-	0	1	2	2	3	1	2	5	0	2	6	0	0	4	4	5
1:27296263-27296800	AT1G72500,	3	-	2	1	4	2	3	4	8	5	0	0	0	2	0	2	4	0
1:5297967-5298120	AT1G05163,AT1G15405,	1	+	0	0	0	0	0	0	0	37	0	0	0	0	0	0	0	0
2:201361-202025	AT2G01450,	2	-	3	0	4	2	2	1	8	4	0	1	2	0	4	1	3	1
5:3927058-3927276	AT5G12150,	1	-	1	2	7	2	0	1	0	7	2	2	0	6	1	1	1	3
5:5052830-5053040	AT5G15540,	1	-	1	2	0	1	4	4	4	7	0	2	1	2	1	0	5	2
5:8429697-8430431	n/a		+	3	1	4	0	1	5	8	5	0	0	1	0	1	0	5	2
5:9502551-9502754	AT5G27000,	1	+	0	0	2	2	3	2	0	7	0	1	0	0	4	3	3	9
5:26255439-26255795	AT5G65670,	2	+	0	0	0	2	0	7	8	5	0	0	3	3	0	3	4	1
1:14160611-14160909	AT1G37130,	1	-	2	3	7	0	3	4	7	8	0	0	1	1	0	0	0	0
1:24036654-24036936	AT1G64680,	1	+	1	3	4	3	0	0	0	0	0	4	4	4	3	2	4	3
1:26862621-26863093	AT1G71260,	3	-	1	1	2	5	5	3	2	4	1	0	4	0	1	2	0	4
2:6369536-6370009	AT2G14835,	2	+	1	1	4	3	2	4	1	3	0	1	4	2	1	4	3	1
2:8659532-8659834	AT2G20060,	2	+	0	3	3	1	4	3	7	0	0	0	2	0	1	2	6	3
3:1312315-1312796	AT3G04780,	2	-	0	2	2	4	6	5	3	5	0	0	1	0	2	2	0	3
4:14961224-14961607	AT4G30690,	3	+	1	3	7	2	1	1	0	2	1	3	3	6	3	0	0	2
4:17180311-17180805	AT4G36360,	3	-	0	1	2	1	3	2	10	5	0	1	2	0	2	0	1	5
4:16164428-16165058	AT4G33650,	3	+	5	6	0	1	4	2	0	0	1	1	0	1	0	1	9	4
1:9407668-9408594	AT1G27100,	2	-	0	0	0	0	1	3	8	9	1	1	5	6	0	0	0	1
1:14160516-14160909	AT1G37130,	1	-	3	0	4	3	2	2	7	8	0	4	1	1	0	0	0	0
1:5414136-5414282	AT1G15740,	1	+	0	4	4	1	6	2	4	8	0	3	0	0	1	0	0	1
1:6891713-6893236	AT1G19860,	3	-	1	7	0	3	2	2	3	0	0	3	4	2	2	3	0	2
2:19001012-19001411	AT2G46270,	3	+	1	1	3	0	2	4	3	3	0	0	2	2	3	2	4	4
3:10033829-10036431	n/a		-	0	0	0	1	3	5	1	0	0	0	0	0	5	9	3	7
3:19217419-19217800	AT3G51820,	3	-	4	4	4	4	2	1	0	0	0	0	3	4	1	3	4	0
5:2152648-2152906	AT5G06950,	2	+	3	2	0	0	3	6	0	0	1	3	4	3	1	2	2	4
5:9985636-9985820	AT5G27950,	1	+	0	1	2	1	2	2	5	4	0	2	2	3	1	2	1	6
1:12599082-12600110	AT1G34460,	5	+	0	0	0	2	0	12	6	6	0	1	0	1	0	6	0	0
1:20609537-20609697	AT1G55250,	1	+	0	0	6	3	0	4	0	6	1	2	1	0	0	1	3	7
3:2359651-2359891	AT3G07370,	2	-	1	1	9	1	1	3	3	1	1	3	2	0	0	3	2	3
5:14738507-14739306	AT5G37240,	4	-	0	4	0	4	1	8	1	1	0	0	0	0	0	9	3	3
5:23072415-23072959	AT5G57015,	4	+	0	2	1	2	0	2	6	5	1	2	0	2	0	2	3	6
1:11459003-11459522	AT1G31910,	3	+	1	3	2	1	5	0	5	6	1	1	3	4	0	0	0	2
1:17126777-17127488	AT1G45201,	2	+	1	3	1	3	3	4	4	8	2	2	0	3	0	0	0	0
3:3776561-3777224	AT3G11930,	3	+	0	0	2	0	0	4	10	16	0	0	2	0	0	0	0	0
3:19988059-19988206	AT3G53980,	1	+	0	0	0	0	1	0	14	15	0	0	3	1	0	0	0	0
Mt:11588-12086	n/a		-	0	0	0	0	0	0	34	0	0	0	0	0	0	0	0	0
1:28512920-28513137	AT1G75940,	1	+	0	0	0	0	0	0	0	0	0	0	0	0	1	6	15	11
2:5912593-5913797	AT2G14050,	5	+	3	2	0	4	0	3	0	1	0	2	3	0	5	6	4	0
2:18242240-18242671	AT2G44100,	3	+	4	0	1	1	0	3	4	7	0	0	0	1	1	3	8	0
3:14727184-14727357	AT3G42640,	1	+	1	0	0	0	4	1	7	4	0	0	1	0	3	4	4	4
3:17192051-17192516	AT3G46668,	3	+	0	1	2	4	1	2	7	8	0	0	2	5	1	0	0	0
3:18166956-18168061	AT3G49010,	4	-	2	2	5	2	1	0	3	3	0	0	0	0	4	2	5	4
4:5406-5588	AT4G00020,	1	-	0	3	1	2	0	8	0	7	0	1	0	0	2	4	5	0
1:9505718-9506203	AT1G27370,	2	-	1	3	0	0	0	0	2	1	1	0	1	3	0	4	10	7
3:17302215-17302478	AT3G46970,	1	-	1	2	6	2	0	0	0	0	3	3	3	7	0	4	2	0
5:3014929-3015118	AT5G09730,	1	-	0	0	0	0	8	9	5	4	0	0	0	0	0	1	6	0
1:16912610-16913095	AT1G44790,	4	-	0	1	1	0	1	7	5	2	0	1	0	4	0	0	7	4
1:5566449-5566862	AT1G16270,	2	+	0	0	3	2	0	5	3	7	0	0	1	2	2	1	4	2
1:28958745-28958994	AT1G77080,	2	+	0	0	1	0	3	3	3	3	0	2	1	0	5	3	4	4
2:14968407-14968584	AT2G35630,	1	+	1	1	4	2	0	0	1	8	0	2	2	1	1	5	1	3
2:16309891-16310616	AT2G39080,	4	-	1	0	3	2	0	2	2	2	1	2	2	3	3	2	4	3
2:18974209-18974352	AT2G09705,	1	+	1	0	0	0	0	16	0	0	0	0	0	0	1	14	0	0
3:23432870-23433083	AT3G63460,	1	-	0	2	1	2	1	3	8	3	0	0	0	6	1	0	5	0
4:11717805-11718606	AT4G22120,	4	-	1	4	1	4	3	5	1	5	0	0	1	0	3	0	4	0
4:13077475-13077713	AT4G25640,	1	-	0	3	4	5	1	0	1	1	2	2	2	1	2	1	4	3
2:15170267-15170510	AT2G36160,	2	+	3	1	3	1	3	3	3	3	1	0	2	4	0	4	0	1
2:19130049-19130224	AT2G46580,	2	-	0	3	0	2	0	4	3	3	2	3	3	0	0	2	5	2
5:8429697-8430069	n/a		+	0	2	2	4	1	5	1	5	0	0	0	2	0	3	5	2
4:17281897-17282678	AT4G36648,	2	-	0	0	0	0	0	2	9	19	0	0	0	0	0	0	0	2
5:4867162-4867560	n/a		-	1	2	2	0	0	1	2	8	2	1	7	4	0	0	0	2
3:3795192-3795368	AT3G11964,	1	-	0	3	0	0	3	3	5	0	0	2	3	3	2	0	2	5
4:6052927-6053097	AT4G09580,	1	-	1	1	3	0	4	5	5	5	1	0	0	2	1	1	2	0
4:10957705-10958861	AT4G20300,	2	+	0	4	0	1	4	6	0	3	0	0	0	0	1	7	3	2
4:16836849-16837057	AT4G35440,	1	-	0	2	6	5	0	0	0	0	0	1	5	3	2	0	3	4
5:4761738-4762066	AT5G14740,	2	+	3	6	5	9	0	0	0	0	1	4	1	1	1	0	0	0
5:24297871-24298832	AT5G60410,	3	+	1	2	0	3	0	2	0	4	0	0	1	2	5	3	4	4
1:1126848-1127673	AT1G04230,	3	+	0	1	0	3	1	2	3	9	0	2	4	2	0	3	0	1
1:10029674-10029943	AT1G28520,	1	+	0	1	7	0	1	4	3	3	0	0	2	2	0	1	6	1
2:8857206-8857575	AT2G20570,	2	-	4	2	11	4	0	0	0	0	0	1	3	2	0	1	2	1
4:18027239-18027385	AT4G38550,	1	+	2	2	2	4	0	4	3	1	1	2	3	5	0	2	0	0
5:17614825-17615167	AT5G43810,	2	+	2	4	2	2	1	2	2	5	0	1	0	3	0	3	4	0
3:2252625-2252932	AT3G07110,	2	+	0	0	3	1	4	2	8	2	0	0	0	2	0	0	6	3
5:8448213-8448555	AT5G24670,	1	+	0	0	0	0	0	2	4	3	3	1	6	6	0	0	3	3
2:9581871-9582430	AT2G22540,	4	+	6	2	0	2	2	6	0	5	0	1	4	3	0	0	0	0
1:1488019-1488479	AT1G05160,	3	-	0	0	0	0	3	0	1	6	1	1	3	0	2	4	5	4
1:29861644-29861927	AT1G79380,	2	+	0	1	2	8	0	5	2	1	0	2	2	4	3	0	0	0
2:1072474-1072845	AT2G03530,	2	+	0	2	0	1	1	3	2	5	2	1	4	3	1	3	1	1
2:19680201-19680395	AT2G48120,	1	+	0	0	0	2	0	8	5	0	0	0	1	2	1	4	4	3
3:18754715-18754944	AT3G50530,	2	+	2	1	1	3	5	8	0	0	0	4	0	0	2	2	0	2
4:2131906-2132078	AT4G04350,	1	+	0	1	3	4	1	0	0	2	1	5	2	2	2	0	2	5
4:18214103-18214299	AT4G39080,	1	+	1	1	2	3	0	0	1	7	0	1	2	2	1	3	5	1
1:17158774-17160881	n/a		-	2	0	0	0	3	7	3	3	0	0	6	4	0	1	0	1
1:18929019-18929181	AT1G51070,	1	+	1	1	6	3	2	0	4	2	0	1	2	1	0	3	4	0
3:523386-524409	AT3G02510,	4	-	0	0	1	3	5	3	2	2	2	2	0	6	0	3	0	1
3:15870261-15870645	AT3G44110,	2	-	0	1	1	1	4	4	1	4	0	1	3	4	0	1	2	3
5:23078033-23078385	AT5G57030,	2	+	2	4	1	3	0	0	0	3	1	0	0	2	0	4	5	5
2:14642165-14642362	AT2G34710,	1	-	0	1	3	1	1	3	5	10	1	1	0	2	0	0	0	2
3:5543983-5544315	AT3G16340,	1	+	0	0	0	0	5	5	7	10	0	0	0	2	0	0	0	1
1:1432292-1432518	AT1G05010,	1	-	0	0	0	0	0	0	0	0	0	0	0	30	0	0	0	0
1:19384926-19385140	AT1G52100,	1	-	2	1	19	8	0	0	0	0	0	0	0	0	0	0	0	0
2:15322418-15322600	AT2G36530,	1	-	2	1	2	0	3	0	2	3	2	1	0	3	4	0	2	4
3:21811460-21811608	AT3G59020,	1	-	0	2	0	0	4	8	0	2	0	0	0	4	1	3	0	5
4:6665633-6666001	n/a		+	2	5	2	3	3	2	1	3	0	0	0	0	1	0	2	5
5:16809221-16810133	AT5G42020,	3	-	0	0	0	4	0	2	0	0	0	0	4	2	1	2	6	8
5:22058195-22058367	AT5G54310,	1	-	1	1	3	0	2	2	3	0	0	1	3	1	2	1	6	3
5:23157629-23159628	AT5G57160,	9	-	0	0	1	2	6	4	2	1	0	3	0	0	4	5	1	0
3:2148272-2148569	AT3G06810,	2	+	0	0	3	5	2	5	0	6	0	2	2	1	0	1	2	0
5:19759867-19760365	AT5G48720,	3	+	2	2	2	3	1	4	2	5	2	0	0	0	0	3	3	0
1:1814926-1815242	AT1G05960,	2	-	2	0	3	2	3	3	2	0	2	0	0	2	0	0	8	2
1:2186103-2186573	AT1G07119,	1	+	0	2	3	2	3	1	5	5	0	3	0	3	0	0	1	1
3:17493843-17494109	AT3G47470,	1	-	3	1	3	5	0	0	0	0	3	1	5	6	0	0	2	0
1:5177963-5179849	AT1G15030,	6	+	0	0	2	0	3	1	4	8	2	1	3	5	0	0	0	0
Mt:189273-189548	n/a		+	1	2	2	0	0	4	11	3	0	1	0	5	0	0	0	0
2:15000179-15000349	AT2G35690,	1	+	0	2	2	1	1	1	1	5	0	0	2	0	2	0	9	2
2:19397075-19397257	AT2G47240,	1	+	0	1	2	1	0	0	0	0	1	0	0	0	5	4	9	5
3:3224717-3224877	AT3G10380,	1	-	0	0	3	3	2	7	0	1	0	1	3	2	2	2	2	0
3:9985474-9985993	AT3G27080,	3	-	0	0	6	1	0	2	6	6	0	0	0	3	1	1	1	1
4:16044793-16046106	AT4G33270,	3	-	3	3	3	7	1	2	0	0	0	1	0	0	1	0	5	2
4:17510760-17511002	AT4G37200,	1	-	0	0	7	0	3	0	0	0	1	0	3	4	5	1	4	0
5:1499134-1500083	AT5G05080,	5	-	4	0	2	4	0	5	0	2	0	0	0	0	2	6	2	1
5:6180403-6180926	AT5G18590,	3	-	1	2	4	3	1	3	1	1	0	0	0	1	2	4	5	0
5:9985890-9986054	AT5G27950,	1	+	0	2	0	1	2	9	3	4	0	1	0	0	2	1	0	3
1:12381927-12384363	n/a		-	1	0	1	0	6	5	0	4	0	1	1	1	0	1	4	3
1:25499591-25499864	AT1G68020,	1	+	0	1	1	0	2	1	5	6	0	0	6	1	0	2	1	2
3:1520411-1520729	AT3G05330,	2	-	2	3	6	3	0	3	0	1	0	0	0	0	0	1	3	6
5:15999457-15999672	AT5G39970,	1	+	0	2	0	2	5	3	7	8	0	0	0	0	0	1	0	0
1:949883-950125	AT1G03780,	1	-	2	3	1	1	6	5	3	3	0	0	0	0	0	0	2	2
1:5774733-5775209	AT1G16880,	3	+	1	0	1	1	0	1	0	1	0	2	7	6	0	0	3	5
3:4173866-4174517	AT3G13040,	1	-	2	2	3	3	2	2	3	0	0	2	4	4	0	0	1	0
3:5047635-5047835	AT3G14990,	1	+	1	0	4	2	3	3	2	11	0	0	0	0	0	0	2	0
3:15568836-15569288	AT3G43670,	1	+	0	2	3	4	5	3	5	4	0	1	0	0	0	0	1	0
3:18207842-18208005	AT3G49120,	1	-	0	0	0	0	0	1	5	4	0	1	7	8	0	0	2	0
4:13189815-13190241	AT4G25980,	2	+	1	1	0	1	3	3	9	2	0	0	3	2	0	0	2	1
4:15076582-15077410	AT4G30975,	3	+	0	1	0	0	5	11	3	6	0	1	0	1	0	0	0	0
1:7445903-7446073	AT1G21270,	1	+	0	4	1	2	0	2	0	0	3	6	4	3	1	0	0	1
1:10783521-10783689	AT1G30470,	1	+	0	0	4	3	1	0	4	3	0	0	1	5	2	0	1	3
1:17582831-17584833	n/a		+	0	1	0	0	2	22	0	0	0	0	0	0	1	1	0	0
1:21165418-21165663	AT1G56500,	2	+	0	5	6	1	0	0	0	0	1	1	5	3	2	0	0	3
2:16089235-16089706	AT2G38410,	3	-	0	0	1	1	1	3	6	3	1	1	0	3	1	2	0	4
2:17330375-17330562	AT2G41550,	1	-	0	2	1	1	1	2	0	8	0	0	0	0	3	4	3	2
2:19530181-19530546	AT2G47610,	2	+	1	1	3	0	3	1	5	6	0	0	2	1	1	2	1	0
3:4938106-4938353	AT3G14690,	1	+	0	2	2	3	0	0	3	2	1	0	5	4	1	1	0	3
1:1106857-1107189	AT1G04190,	2	-	0	1	0	0	7	4	4	1	3	2	0	1	0	2	2	0
2:8779879-8780691	AT2G20340,	3	+	1	0	0	0	4	1	3	5	2	1	3	4	0	3	0	0
2:15832867-15833142	AT2G37760,	1	+	0	0	1	3	0	0	7	7	0	0	4	3	0	1	0	1
3:22036750-22037661	AT3G59660,	4	-	3	2	1	2	3	0	2	6	0	0	3	1	0	1	2	1
4:15949399-15949737	AT4G33060,	2	+	0	0	3	1	0	1	0	6	0	2	2	1	0	1	6	4
5:26537665-26537931	n/a		-	2	0	2	1	4	7	5	3	0	0	0	0	0	2	1	0
1:13641636-13641857	AT1G36280,	1	+	0	0	2	2	4	6	3	0	0	0	0	2	0	0	6	2
1:25494908-25495509	AT1G68010,	4	+	0	3	6	3	0	0	0	0	0	2	7	3	0	0	1	2
1:26221241-26221499	AT1G69700,	1	+	0	1	0	0	0	6	4	2	1	1	1	1	0	0	8	2
2:7533688-7534083	AT2G17320,	3	-	0	6	2	3	1	0	3	1	0	0	3	0	0	0	3	5
4:10077201-10078259	AT4G18215,	4	-	0	0	0	0	1	1	12	8	0	1	1	1	0	0	2	0
5:19348568-19349055	AT5G47780,	2	+	1	2	1	0	5	6	1	4	0	0	0	0	0	0	2	5
4:12104893-12106255	AT4G23100,	7	-	2	2	1	4	2	2	6	6	0	0	2	0	0	0	0	0
4:6664265-6666001	n/a		+	0	6	0	0	8	8	0	4	0	0	0	1	0	0	0	0
3:21929798-21931203	AT3G59340,	7	-	0	0	2	4	2	15	4	0	0	0	0	0	0	0	0	0
1:5297907-5298178	AT1G05163,	1	+	1	0	1	3	1	0	4	6	1	1	3	4	1	0	0	0
1:26536042-26536517	AT1G70410,	2	-	0	2	1	10	0	0	2	0	0	0	2	2	2	3	2	0
2:698600-698987	AT2G02570,	2	-	0	1	2	2	1	4	3	3	0	0	3	0	1	0	4	2
2:1333778-1333983	AT2G04039,	1	+	1	0	6	0	0	3	0	0	0	1	7	2	1	1	1	3
2:11539115-11539374	AT2G27040,	2	-	2	4	1	0	1	3	0	1	0	1	0	0	2	0	4	7
2:15502635-15502810	AT2G36910,	1	+	0	1	0	0	2	2	2	5	0	0	1	2	1	4	6	0
2:19317818-19318410	AT2G47010,	1	+	3	0	2	1	3	5	0	0	0	1	1	0	1	3	1	5
3:20703510-20703933	AT3G55770,	2	+	0	1	2	0	0	1	1	5	0	0	2	0	1	6	4	3
4:9240030-9240276	AT4G16340,	2	-	0	0	4	4	1	1	3	5	1	1	0	0	1	3	1	1
4:16206388-16206807	AT4G33790,	2	-	0	0	0	0	0	0	0	2	0	0	0	0	3	6	11	4
5:8429572-8430431	n/a		+	3	2	2	0	1	0	0	9	0	2	0	0	1	0	4	2
5:20143750-20144197	AT5G49630,	2	-	0	2	1	0	2	3	4	1	0	0	2	5	2	1	0	3
1:1126848-1127256	AT1G04230,	2	+	0	3	0	0	0	0	0	6	1	0	3	3	0	2	6	2
1:10293054-10293493	AT1G29400,	1	-	0	0	4	0	2	3	7	4	0	1	0	2	0	1	1	1
1:10796547-10797285	AT1G30490,	3	-	0	2	0	4	4	4	0	2	0	0	0	1	0	2	5	2
1:12550957-12551419	AT1G34370,	1	+	0	1	0	0	2	3	7	6	0	1	1	1	0	1	0	3
1:18060474-18060978	AT1G48830,	3	-	0	0	3	0	2	4	3	1	1	2	3	1	0	1	4	1
1:26063431-26063608	AT1G69325,	2	+	0	3	0	0	3	16	0	0	0	0	0	0	0	4	0	0
2:18525731-18526165	AT2G44920,	3	+	0	5	3	4	0	0	0	0	2	3	3	0	0	2	2	2
4:7506949-7507125	AT4G12770,	1	-	0	1	5	0	6	3	2	0	1	1	2	2	0	3	0	0
5:2322569-2322766	AT5G07350,	1	-	0	0	0	2	1	7	3	6	0	0	3	2	0	1	1	0
5:6787547-6787816	AT5G20090,	2	-	1	1	2	1	0	4	2	5	0	0	3	0	0	2	3	2
5:14934232-14934435	AT5G37600,	1	-	0	1	4	2	1	2	2	2	0	0	5	1	0	4	2	0
1:10042179-10042455	AT1G28570,	1	-	2	0	1	3	2	4	0	3	1	0	2	2	0	0	1	5
1:12350714-12350970	AT1G33970,	1	-	0	2	0	0	0	1	3	4	0	1	3	4	0	0	4	4
5:26010546-26010725	AT5G65110,	1	-	0	0	3	7	1	3	1	4	0	0	4	1	0	0	2	0
1:14160595-14160909	AT1G37130,	1	-	0	0	3	0	0	4	7	4	0	0	3	5	0	0	0	0
3:17711502-17711907	AT3G47980,	2	+	0	0	0	0	5	4	7	9	0	0	1	0	0	0	0	0
5:18535538-18535842	AT5G45690,	2	-	0	2	16	6	0	0	1	0	0	0	0	1	0	0	0	0
1:5106163-5106421	AT1G14820,	1	-	1	1	2	0	2	0	3	2	2	0	2	3	2	0	2	3
1:10812007-10812393	AT1G30520,	2	+	1	4	4	4	0	0	0	0	0	0	3	1	2	3	2	1
1:12195268-12196514	AT1G33615,	3	-	0	1	6	2	1	3	1	2	0	0	0	2	2	2	0	3
1:17179610-17180439	AT1G45474,	4	+	1	2	3	2	0	0	0	0	1	4	1	5	2	1	2	1
2:17736698-17737537	AT2G42600,	4	-	3	5	2	2	0	1	0	0	1	3	2	2	2	1	0	1
3:2244277-2244505	AT3G07090,	2	-	0	1	1	0	1	3	5	11	0	0	0	2	1	0	0	0
3:9941954-9942098	AT3G26950,	1	-	0	0	1	1	4	5	0	3	1	0	6	0	1	0	3	0
4:5784274-5784712	AT4G09020,	3	+	0	0	1	0	0	1	1	4	0	1	2	4	2	1	5	3
4:9951550-9951906	AT4G17910,	3	-	0	0	3	3	1	3	0	1	0	0	1	1	2	1	3	6
4:12834810-12835078	AT4G24970,	2	+	1	1	2	0	0	3	1	0	0	2	0	0	3	4	6	2
4:16948907-16949569	AT4G35780,	3	-	0	1	1	3	1	3	0	4	0	2	3	0	1	2	4	0
5:5159266-5159793	AT5G15810,	3	+	2	2	2	0	0	0	5	5	1	0	0	3	1	1	2	1
5:14684300-14684996	AT5G37130,	4	+	0	0	4	0	1	3	0	2	1	0	3	0	3	2	4	2
5:24600597-24600915	AT5G61140,	2	+	0	1	1	0	1	2	0	3	2	0	1	2	3	0	3	6
5:24890289-24890484	AT5G61970,	1	+	1	1	1	2	0	1	2	11	0	0	2	0	1	0	1	2
1:4778499-4778663	AT1G13960,	1	+	0	0	3	4	1	3	1	4	0	0	7	0	0	1	1	0
1:26500650-26501040	AT1G70320,	2	-	0	0	1	3	2	0	7	7	0	0	1	1	0	1	1	1
4:13916573-13917240	AT4G27960,	2	-	0	1	0	0	2	2	6	9	0	0	0	1	0	1	3	0
5:795090-795611	AT5G03290,	3	+	0	2	1	1	0	3	0	3	0	1	0	6	0	2	6	0
5:5173191-5174147	AT5G15845,	3	+	0	0	0	0	1	1	0	3	0	0	6	8	0	0	4	2
1:9069033-9069523	AT1G26208,	2	-	0	0	0	2	3	3	9	3	0	0	3	0	0	0	0	2
1:5297907-5298107	AT1G05163,AT1G15405,	1	+	0	0	0	0	0	0	5	8	0	0	7	5	0	0	0	0
4:8632423-8632594	AT4G15110,	1	-	0	7	2	4	0	0	0	1	1	3	5	2	0	0	0	0
5:26389498-26390008	AT5G65970,	3	-	0	0	0	1	1	5	8	10	0	0	0	0	0	0	0	0
1:2582087-2583038	AT1G08220,	4	-	1	2	2	1	2	3	1	6	0	1	0	1	2	0	0	2
1:26936498-26936758	AT1G71500,	0	+	1	2	3	2	0	0	0	0	0	0	5	4	2	1	3	1
1:28737149-28737293	AT1G76580,	1	+	1	2	0	1	0	4	1	3	0	0	7	1	1	0	1	2
2:325071-325397	AT2G01735,	2	+	0	2	4	0	0	4	2	2	0	0	2	1	2	0	4	1
2:18571095-18571398	AT2G45023,	2	-	0	2	1	0	2	4	1	2	1	1	0	1	1	6	2	0
2:19452927-19453157	AT2G47410,	2	+	1	0	2	0	1	4	3	3	0	1	0	2	2	2	3	0
3:3912443-3912610	AT3G12270,	1	+	3	0	3	1	4	0	1	2	0	0	0	4	1	2	0	3
3:9065165-9065464	AT3G24830,	2	+	1	2	0	6	2	0	0	2	0	1	0	1	1	0	8	0
3:21625648-21625813	AT3G58460,	1	-	0	4	1	0	0	0	0	0	1	2	2	1	2	2	5	4
4:14961224-14961706	AT4G30690,	4	+	0	2	8	3	0	0	0	0	0	3	0	1	1	0	4	2
4:18148098-18148383	AT4G38920,	1	+	0	3	2	3	0	0	3	0	1	0	3	1	1	4	2	1
5:794380-795164	AT5G03290,	3	+	0	0	3	2	0	7	3	3	1	1	0	0	2	0	2	0
5:5959179-5959446	AT5G17990,	2	+	1	2	0	0	0	0	0	4	0	0	2	4	1	2	5	3
5:7398011-7398451	AT5G22350,	3	-	0	1	5	5	0	2	1	1	0	0	0	3	1	0	1	4
5:7962537-7963227	AT5G23630,	3	-	0	0	0	2	0	1	2	7	0	1	0	3	3	0	4	1
1:23774897-23775064	AT1G64060,	1	+	0	0	0	3	1	1	8	6	0	0	1	2	0	2	0	0
1:30127053-30127295	AT1G80070,	1	+	0	1	1	1	1	0	2	6	0	1	3	2	0	1	3	2
3:8838212-8838729	AT3G24350,	2	+	0	0	3	0	1	2	4	6	0	1	4	0	0	1	2	0
3:17281857-17282009	AT3G46920,	1	-	0	4	2	0	1	2	0	8	0	0	2	1	0	2	2	0
4:14246513-14247035	AT4G28860,	3	+	0	2	0	3	0	5	0	0	0	0	5	3	0	2	1	3
5:24870938-24871293	AT5G61940,	2	+	1	1	0	1	0	1	0	1	1	0	0	2	0	1	13	2
1:5063252-5063555	AT1G14710,	2	-	0	0	1	0	0	0	4	9	0	0	4	5	0	0	0	1
5:290443-290670	AT5G01750,	1	+	1	1	6	4	0	2	1	0	0	4	2	2	0	0	0	1
1:29357085-29357413	AT1G78070,	2	+	0	0	0	0	0	1	9	5	0	0	8	1	0	0	0	0
1:628246-628469	AT1G02840,	1	+	1	0	0	0	1	2	4	3	0	0	0	2	1	0	7	2
1:20195580-20195917	AT1G54100,	2	-	0	0	3	0	1	0	2	3	0	0	2	7	2	2	0	1
1:28009899-28010124	AT1G74530,	2	-	0	1	1	2	3	0	0	0	3	0	4	0	1	3	4	1
1:30009007-30009798	AT1G79750,	5	-	0	1	2	2	1	2	0	0	0	0	0	1	1	5	7	1
2:14353899-14356826	AT2G33980,	4	-	1	0	4	2	1	1	1	2	0	0	0	2	1	0	4	4
3:6854182-6854403	AT3G19720,	1	-	0	0	6	2	1	0	0	1	1	2	0	2	1	0	4	3
3:7836101-7836373	AT3G22200,	2	+	0	2	1	0	0	0	0	4	0	0	4	3	1	2	3	3
5:19034466-19034734	AT5G46880,	1	+	0	0	6	4	0	0	0	0	0	1	0	0	2	1	4	5
2:14640631-14640771	AT2G34710,	1	-	0	0	2	0	4	3	6	3	0	1	0	2	0	1	0	1
3:17169794-17170903	AT3G46614,	6	-	0	1	0	0	2	16	0	0	0	0	0	0	0	4	0	0
4:4201887-4202147	AT4G07410,	1	-	0	1	0	0	3	2	3	7	0	0	1	3	0	1	2	0
5:8737373-8737557	AT5G25220,	1	+	1	2	1	1	0	1	5	1	0	2	3	3	0	2	1	0
5:9725460-9725892	AT5G27540,	2	+	0	2	4	0	2	0	5	2	2	0	0	2	0	2	0	2
5:21013035-21013226	AT5G51730,	1	+	3	2	1	1	0	0	1	4	0	1	1	2	0	2	3	2
3:7273039-7273526	AT3G20800,	3	-	2	3	3	1	1	2	1	1	0	0	1	2	0	0	4	2
4:13978537-13978757	AT4G28150,	1	-	0	0	0	0	4	4	3	7	0	0	0	0	0	0	2	3
5:3453072-3453700	AT5G10940,	3	-	0	0	0	0	0	1	4	11	1	0	1	2	0	0	3	0
5:23231371-23231820	AT5G57350,	2	-	0	0	0	0	0	0	1	5	1	0	5	7	0	0	2	2
5:25372483-25372909	AT5G63310,	3	-	3	0	5	2	2	2	2	0	0	1	2	1	0	0	1	2
Mt:189281-189548	n/a		+	0	0	5	2	0	0	0	13	0	0	0	0	0	0	3	0
2:13271986-13272162	AT2G31141,	1	-	0	0	2	0	0	0	3	7	0	0	0	5	0	0	0	6
3:4673524-4674660	AT3G14100,	7	+	3	0	4	3	0	3	0	3	0	0	3	2	0	0	0	2
1:24301628-24302463	AT1G65430,	3	-	1	2	1	4	4	2	4	3	0	0	0	2	0	0	0	0
1:2707424-2707677	AT1G08550,	1	+	2	1	1	12	0	0	0	0	1	1	0	3	1	0	0	0
1:11076820-11078000	AT1G31050,	2	-	0	0	0	0	6	4	2	8	0	0	0	0	2	0	0	0
1:18202013-18202633	AT1G49210,	1	-	0	1	0	0	1	0	0	0	0	0	6	3	1	2	5	3
1:20406003-20406145	AT1G54650,	1	-	0	0	1	1	2	3	4	5	0	1	0	0	2	0	0	3
1:21875254-21876190	AT1G59540,	5	+	0	0	1	2	0	5	3	5	0	0	0	0	1	0	2	3
2:3170845-3171027	AT2G07560,	1	-	0	0	0	0	0	0	0	0	0	0	0	0	4	3	8	7
2:11035244-11036352	AT2G25880,	6	-	2	2	6	2	4	2	0	0	0	0	0	0	2	2	0	0
2:13183632-13184342	AT2G30980,	4	-	0	4	0	3	3	4	2	3	0	0	0	0	2	0	0	1
3:3815643-3815844	AT3G11980,	1	+	0	0	0	0	0	0	0	0	0	0	0	0	1	4	11	6
3:3844263-3844456	AT3G12060,	1	+	2	1	2	0	0	2	1	1	0	0	1	1	2	4	2	3
3:4764784-4765466	AT3G14290,	3	+	2	1	0	2	2	5	0	0	0	1	0	1	1	2	4	1
3:17171472-17172914	n/a		-	0	0	0	0	5	9	6	0	0	0	0	0	1	1	0	0
4:7488368-7489041	AT4G12720,	4	+	0	0	2	3	6	2	0	3	0	0	0	0	2	3	1	0
4:8884860-8885175	AT4G15560,	1	+	0	1	3	5	0	0	1	3	0	2	0	0	2	0	3	2
4:14755822-14755984	AT4G30160,	1	+	0	0	0	5	2	4	5	3	0	0	0	0	1	2	0	0
4:16204789-16205055	AT4G33790,	1	-	0	0	0	0	0	0	0	0	0	0	0	0	5	5	9	3
4:17933771-17934117	AT4G38240,	3	-	0	0	0	3	4	0	7	3	0	0	0	0	1	3	0	1
5:2459361-2459915	AT5G07740,	3	-	0	0	1	1	3	5	1	5	0	0	1	0	1	0	4	0
5:19508494-19509083	AT5G48120,	3	-	1	2	1	1	3	0	3	3	0	0	1	0	2	0	4	1
5:25564225-25564624	AT5G63880,	2	+	1	0	1	0	2	2	4	4	0	2	1	3	1	0	0	1
1:30047900-30048203	AT1G79880,	1	-	2	2	0	0	1	0	0	5	0	4	0	2	0	1	2	3
2:1577835-1578280	AT2G04530,	3	+	0	0	5	4	1	2	1	0	0	0	1	0	0	1	3	4
3:8283680-8284017	AT3G23210,	2	-	0	2	0	1	0	3	5	3	0	0	1	2	0	4	1	0
3:18485718-18486058	AT3G49840,	2	+	0	0	0	0	0	3	3	1	1	2	2	0	0	4	4	2
4:15306971-15307263	AT4G31580,	2	+	1	3	2	3	0	6	0	1	0	0	2	1	0	1	2	0
5:3487488-3487767	AT5G11020,	2	-	0	1	2	8	2	1	0	0	0	0	0	0	0	5	2	1
5:4865208-4865576	AT5G15020,	2	-	0	1	2	1	0	1	0	3	2	3	2	1	0	5	1	0
1:29660399-29661085	AT1G78900,	3	+	0	0	4	1	0	1	2	0	0	4	0	0	0	0	4	6
3:5741401-5741595	AT3G16840,	1	-	4	1	2	0	1	2	0	4	0	0	1	2	0	0	3	2
4:14961224-14962055	AT4G30690,	6	+	2	1	2	2	1	0	0	4	1	0	1	2	0	0	5	1
5:9816179-9816924	AT5G27720,	3	+	0	0	2	0	1	2	6	2	0	0	3	1	0	0	2	3
5:20477146-20477609	AT5G50310,	3	+	0	3	1	1	4	2	1	5	0	0	1	0	0	0	4	0
4:10674300-10674906	AT4G19600,	2	+	1	0	1	1	1	3	2	8	0	0	0	2	0	0	0	3
5:1966475-1966823	AT5G06440,	2	-	0	3	3	0	0	5	4	1	0	2	3	0	0	0	0	1
1:30218493-30218834	AT1G80380,	2	+	0	1	0	1	0	5	8	6	0	1	0	0	0	0	0	0
1:14160613-14160909	AT1G37130,	1	-	1	0	3	4	0	2	4	2	0	0	1	5	0	0	0	0
3:18207857-18208005	AT3G49120,	1	-	0	0	0	0	2	1	2	2	0	0	10	5	0	0	0	0
3:5399180-5399968	AT3G15950,	6	-	0	2	4	0	0	6	8	2	0	0	0	0	0	0	0	0
5:1033457-1033782	AT5G03860,	1	-	0	0	12	10	0	0	0	0	0	0	0	0	0	0	0	0
3:643753-643983	AT3G02890,	1	+	1	0	2	0	0	2	4	0	0	0	0	1	3	4	4	0
3:17303151-17303354	AT3G46970,	1	-	1	4	1	0	3	0	1	0	0	1	0	0	4	4	0	2
3:18800911-18801224	AT3G50630,	2	+	1	3	2	0	3	0	1	2	0	0	0	0	1	3	2	3
3:22153254-22153607	AT3G59970,	1	+	0	0	1	2	0	4	0	5	0	0	2	2	3	0	0	2
4:358453-358726	AT4G00850,	1	+	0	1	2	1	3	1	4	2	0	0	0	3	1	0	3	0
4:18095427-18095960	AT4G38760,	2	-	0	2	3	0	3	2	1	2	0	2	0	0	2	0	1	3
5:1499540-1500083	AT5G05080,	3	-	0	2	0	2	2	4	1	1	0	0	0	0	2	0	5	2
5:6979386-6980237	AT5G20635,	4	-	1	3	1	0	0	2	0	0	0	0	1	0	1	5	6	1
5:7302443-7302832	AT5G22050,	3	+	0	2	0	0	0	4	1	3	0	1	1	0	1	2	2	4
5:8282404-8282698	AT5G24318,	1	-	0	0	2	4	2	2	0	3	0	0	1	0	1	1	3	2
5:18169499-18169675	AT5G45020,	1	+	0	3	0	0	0	4	1	2	0	1	0	1	4	2	0	3
5:19653644-19653844	AT5G48500,	1	+	1	3	0	0	2	3	1	3	0	0	0	0	2	2	2	2
1:19522099-19522642	AT1G52410,	4	+	1	1	0	0	3	7	3	0	0	2	0	0	0	1	2	1
1:20294466-20295154	AT1G54370,	5	-	2	2	0	0	2	2	1	2	0	2	0	0	0	4	2	2
1:30009369-30009798	AT1G79750,	3	-	0	1	3	1	2	3	3	0	0	1	0	0	0	4	0	3
2:19129866-19130224	AT2G46580,	3	-	2	2	2	3	0	4	0	0	0	1	0	0	0	1	2	4
3:4380313-4380573	AT3G13445,	2	+	0	0	2	0	1	3	4	6	0	0	0	0	0	1	3	1
4:16041470-16042782	AT4G33260,	3	-	2	2	1	0	2	1	1	3	0	0	0	0	0	2	2	5
5:5173191-5174949	AT5G15845,	4	+	1	0	3	0	1	0	1	1	0	0	4	4	0	2	3	1
5:21487130-21487630	AT5G53000,	2	-	0	0	1	1	1	3	1	4	4	1	1	1	0	1	0	2
1:7374794-7375362	AT1G21065,	4	+	2	8	2	0	2	0	2	3	0	0	1	0	0	0	1	0
1:27915328-27915838	AT1G74230,	3	+	0	0	4	1	2	1	2	4	0	0	4	0	0	0	3	0
5:7584873-7594683	n/a		-	0	1	1	3	2	5	0	1	1	0	0	0	0	0	3	4
5:24209235-24209842	AT5G60120,	2	+	0	0	1	0	1	4	4	3	0	0	0	4	0	0	4	0
2:15753703-15753847	AT2G37540,	1	-	0	5	0	1	0	0	0	0	3	5	4	3	0	0	0	0
3:7957250-7957631	AT3G22430,	1	+	0	0	0	0	0	0	5	8	0	0	6	2	0	0	0	0
5:21241063-21241245	AT5G52310,	1	+	0	0	0	0	0	0	5	7	0	0	6	3	0	0	0	0
3:15208791-15209280	AT3G43230,	2	+	0	1	0	0	1	1	8	4	0	0	0	6	0	0	0	0
1:1145295-1145720	AT1G04280,	2	-	0	1	1	4	5	4	3	3	0	0	0	0	0	0	0	0
2:9627491-9627701	AT2G22660,	0	+	0	0	0	0	0	0	0	21	0	0	0	0	0	0	0	0
1:3516140-3516347	AT1G10640,	1	-	1	3	0	0	0	1	3	5	0	0	1	0	1	0	2	3
1:19965298-19965635	AT1G53490,	3	+	1	2	1	3	1	2	0	0	0	0	0	1	3	4	0	2
2:2324109-2324641	AT2G05990,	4	+	0	1	2	0	0	4	3	2	0	0	0	1	2	0	3	2
2:13635786-13636332	AT2G32040,	3	+	2	1	3	1	1	3	0	0	0	1	0	1	1	4	0	2
3:542501-542962	AT3G02560,	2	+	0	0	1	0	2	2	3	4	0	2	1	0	1	0	1	3
3:1854487-1854751	AT3G06130,	2	-	0	0	1	0	0	1	0	0	0	0	0	0	4	4	9	1
3:3483307-3483492	AT3G11130,	1	-	0	0	1	1	0	1	4	4	1	0	0	0	2	2	1	3
3:10976917-10977175	AT3G28950,	2	-	0	0	0	0	2	3	5	3	0	0	0	3	1	0	2	1
4:10660505-10660916	AT4G19550,	3	-	0	2	1	1	0	1	0	3	0	0	3	1	2	0	6	0
4:16708668-16708900	AT4G35100,	1	-	0	3	0	0	2	1	0	1	0	1	0	0	2	1	6	3
5:2167784-2168109	AT5G06980,	1	+	1	5	2	4	0	1	0	1	1	2	0	0	1	1	0	1
5:14738507-14741529	n/a		-	0	1	0	1	1	11	0	2	0	0	0	1	1	1	0	1
1:949883-951211	AT1G03780,	6	-	0	2	0	5	0	4	0	0	0	0	0	0	0	3	3	3
1:2402081-2402458	AT1G07745,	2	-	1	0	0	0	0	2	1	3	1	3	5	2	0	1	1	0
1:5114125-5114295	AT1G14840,	1	-	0	3	2	0	0	2	1	0	0	2	1	0	0	1	4	4
1:8271213-8271373	AT1G23310,	1	-	2	0	5	3	0	0	0	0	2	3	0	2	0	2	0	1
1:12195268-12196335	AT1G33615,	3	-	1	0	0	4	0	1	3	5	1	1	0	0	0	2	0	2
1:17180021-17180439	AT1G45474,	2	+	0	0	4	1	0	0	0	0	2	4	4	0	0	1	2	2
1:19166630-19167124	AT1G51690,	3	+	0	0	1	4	2	1	4	1	0	0	3	0	0	1	0	3
1:25753544-25753864	AT1G68580,	2	+	0	2	5	1	1	1	0	2	0	1	0	3	0	4	0	0
1:26674698-26675242	AT1G70740,	2	-	2	1	2	1	1	2	3	3	2	0	0	0	0	1	2	0
2:269324-270061	AT2G01600,	4	+	0	1	0	4	2	3	1	2	1	1	0	1	0	2	0	2
3:4947383-4947538	AT3G14720,	1	+	0	1	1	1	1	3	3	3	0	0	2	1	0	1	2	1
3:9280105-9280484	AT3G25560,	1	-	0	0	0	0	3	5	3	7	0	0	0	0	0	1	0	1
4:14353387-14353729	AT4G29130,	2	-	0	0	0	2	0	2	0	1	0	0	2	1	0	3	6	3
4:18095787-18095960	AT4G38760,	1	-	0	2	0	0	3	0	0	1	0	1	1	2	0	5	1	4
5:9245851-9246301	AT5G26340,	1	-	0	0	0	0	0	0	4	1	0	0	12	2	0	1	0	0
5:17388363-17388511	AT5G43320,	1	-	0	0	0	0	3	1	4	2	1	1	1	2	0	2	2	1
5:19349134-19349491	AT5G47780,	1	+	0	1	3	2	1	3	2	2	0	0	1	0	0	1	2	2
5:22925877-22926139	AT5G56630,	1	+	0	0	0	0	2	1	3	8	0	0	3	1	0	1	1	0
5:22959065-22959341	AT5G56750,	2	+	0	0	3	0	2	2	1	5	0	0	0	1	0	1	2	3
1:26619134-26619804	AT1G70590,	2	+	0	0	3	2	0	2	5	4	0	0	0	2	0	0	2	0
3:4404736-4404900	AT3G13510,	1	+	1	0	1	1	1	2	2	2	0	1	0	0	0	0	9	0
3:20887182-20887566	AT3G56320,	2	-	0	0	0	0	3	4	3	2	0	0	0	0	0	0	6	2
5:23231892-23232065	AT5G57350,	1	-	0	0	0	0	0	1	2	5	0	0	4	6	0	0	2	0
1:5020327-5020511	AT1G14630,	1	+	2	1	0	0	6	3	5	0	0	0	1	0	0	0	0	2
5:23232138-23232298	AT5G57350,	1	-	0	1	1	0	2	0	0	2	1	1	3	7	0	0	0	2
3:17909585-17909888	AT3G48360,	1	-	2	0	6	4	2	0	0	1	2	2	0	1	0	0	0	0
2:698811-698987	AT2G02570,	1	-	0	1	3	0	0	1	5	4	0	0	3	3	0	0	0	0
1:20726904-20727486	AT1G55520,	4	-	0	4	1	2	2	6	2	1	0	0	0	2	0	0	0	0
1:5297892-5298120	AT1G05163,AT1G15405,	1	+	0	0	11	9	0	0	0	0	0	0	0	0	0	0	0	0
1:394228-394451	AT1G02110,	1	+	0	0	0	1	0	0	1	6	1	0	0	1	5	0	4	0
1:1314464-1315416	AT1G04690,	4	+	0	2	0	2	0	2	0	0	0	0	0	0	4	3	6	0
1:2180751-2181011	AT1G07110,	2	-	0	2	0	0	0	0	0	0	3	2	2	0	2	4	4	0
1:9559230-9559467	AT1G27520,	2	+	1	0	1	0	2	3	1	2	0	0	0	2	1	2	3	1
1:17284119-17284593	AT1G47128,	2	-	0	1	1	3	0	2	4	4	0	0	0	1	1	0	0	2
2:206522-206972	AT2G01460,	3	+	0	0	0	2	1	1	2	0	1	2	0	2	2	2	2	2
2:1036395-1036541	AT2G03430,	1	-	1	1	0	0	3	2	2	2	0	0	2	1	2	1	2	0
2:19395931-19396085	AT2G47240,	1	+	1	0	0	0	0	0	0	0	0	0	0	0	8	4	2	4
3:3340338-3340668	AT3G10690,	2	-	0	2	0	4	1	0	0	0	0	0	3	3	1	0	2	3
3:7145431-7145904	AT3G20475,	4	+	1	0	1	1	2	2	1	3	0	1	0	1	2	1	2	1
3:22631018-22631226	AT3G61150,	1	+	1	0	2	7	0	0	1	0	0	0	0	1	1	2	0	4
4:34922-35550	AT4G00090,	2	+	2	0	1	0	1	0	4	0	0	1	2	2	2	2	0	2
4:11165070-11165240	AT4G20850,	1	-	0	0	3	2	1	2	1	1	0	2	3	0	1	2	1	0
4:11460245-11460715	AT4G21540,	2	+	0	0	1	4	0	4	0	1	0	2	0	1	4	0	0	2
5:1965359-1965674	AT5G06440,	2	-	0	2	1	0	0	2	0	2	0	1	1	3	2	2	0	3
5:3076607-3076806	AT5G09870,	1	+	0	4	0	0	0	0	3	1	0	0	1	2	2	1	2	3
5:4537775-4538092	AT5G14060,	2	+	4	0	0	0	0	0	0	3	1	1	0	5	1	3	1	0
5:14233461-14233790	AT5G36160,	2	-	1	1	1	2	3	0	1	2	0	0	3	3	1	0	0	1
5:24462169-24462313	AT5G60800,	1	-	0	1	0	1	0	0	0	0	0	0	0	2	3	4	3	5
1:1813386-1815085	AT1G05960,	7	-	0	2	0	3	3	1	1	5	0	0	0	1	0	1	0	2
1:17458136-17458457	AT1G47550,	2	+	0	1	2	0	3	0	0	6	0	0	0	3	0	1	2	1
1:24821701-24821964	AT1G66530,	2	-	0	2	1	1	4	1	4	1	0	0	2	0	0	1	2	0
1:26491372-26491622	AT1G70320,	1	-	0	0	0	3	0	1	2	1	0	0	1	2	0	1	5	3
1:27373744-27373892	AT1G72710,	1	+	0	0	0	0	7	1	3	3	0	2	1	0	0	1	1	0
2:13635790-13636332	AT2G32040,	3	+	0	2	2	6	0	3	2	0	0	0	0	0	0	2	0	2
2:13867526-13868171	AT2G32700,	3	+	0	0	0	0	0	2	4	3	1	2	0	2	0	2	3	0
2:14850698-14851349	AT2G35260,	4	+	0	4	0	0	0	0	0	1	3	1	1	6	0	1	1	1
2:16699042-16699499	AT2G39990,	2	-	2	0	1	0	1	2	0	2	0	1	3	2	0	1	1	3
3:33788-33980	AT3G01090,	1	-	1	0	0	0	0	2	1	5	0	0	3	4	0	3	0	0
3:2591238-2591485	AT3G08530,	2	-	1	1	2	1	1	2	0	7	0	0	0	0	0	2	2	0
3:3536432-3536935	AT3G11290,	1	-	0	5	0	1	2	4	1	1	1	2	0	0	0	1	1	0
3:4387215-4387911	AT3G13460,	4	-	2	0	2	0	1	4	0	1	0	0	2	4	0	3	0	0
3:7956137-7957631	AT3G22430,	2	+	0	1	0	0	3	1	3	2	1	0	4	1	0	1	0	2
3:9245580-9245954	n/a		+	1	0	0	0	0	0	5	5	0	0	1	3	0	1	0	3
4:14343065-14343883	AT4G29100,	4	+	0	2	0	3	1	0	4	7	0	0	0	0	0	2	0	0
5:5292224-5292425	AT5G16210,	1	-	0	0	0	3	1	1	3	5	0	0	2	1	0	1	0	2
5:6511067-6512013	AT5G19330,	5	-	1	4	3	0	0	5	1	1	0	1	0	2	0	1	0	0
5:14233864-14234226	AT5G36160,	2	-	2	1	1	1	1	0	4	1	0	2	1	2	0	1	1	1
5:26654064-26654413	AT5G66760,	2	+	0	0	2	0	3	0	2	4	0	0	3	1	0	1	2	1
1:9982125-9982880	AT1G28420,	2	+	0	0	1	0	1	1	5	3	2	0	0	1	0	0	2	3
2:12043928-12044240	AT2G28250,	2	+	0	0	0	0	4	4	3	4	0	0	0	0	0	0	3	1
2:12044148-12044422	AT2G28250,	2	+	0	0	0	0	3	9	3	3	0	0	0	0	0	0	1	0
2:16601323-16602049	AT2G39800,	3	-	0	0	0	1	0	0	0	1	2	2	1	9	0	0	2	1
3:853610-854040	AT3G03560,	3	-	0	0	0	3	2	3	0	7	0	0	2	0	0	0	1	1
3:4323066-4323467	AT3G13330,	3	-	1	2	1	2	0	2	0	1	0	2	1	3	0	0	4	0
3:16914873-16915263	AT3G46040,	2	+	0	2	0	1	1	3	3	3	0	1	1	1	0	0	1	2
4:8169641-8170551	AT4G14160,	4	+	0	0	2	0	4	0	2	0	0	0	4	3	0	0	2	2
4:16140555-16141085	AT4G33580,	3	+	1	0	3	3	0	1	0	0	1	1	1	0	0	0	5	3
4:11010895-11011573	AT4G20400,	2	+	0	0	1	2	0	1	5	4	0	1	0	2	0	0	0	3
3:3780027-3781617	AT3G11945,	7	-	0	3	2	2	0	3	4	0	1	2	2	0	0	0	0	0
1:1746210-1747440	AT1G05805,	5	+	0	7	0	0	1	3	0	0	0	0	0	0	3	1	1	2
1:2095069-2095408	AT1G06820,	2	-	1	1	1	1	0	2	1	3	0	1	0	4	1	0	1	1
1:2828106-2828581	AT1G08830,	3	+	0	3	0	1	0	0	0	8	1	0	0	2	1	0	2	0
1:5664358-5664590	AT1G16540,	1	+	0	0	0	1	1	1	1	4	0	0	1	2	1	1	1	4
1:12464632-12465170	AT1G34220,	2	-	0	2	1	4	0	1	0	1	0	0	6	2	1	0	0	0
1:19412117-19412428	AT1G52150,	2	-	0	0	0	1	0	2	0	3	0	0	3	2	3	1	2	1
2:7444508-7444725	AT2G17110,	1	-	0	3	2	2	0	0	1	0	0	3	3	1	1	0	2	0
2:10778489-10779159	AT2G25310,	3	-	1	3	1	1	0	2	2	0	0	0	0	0	1	1	4	2
2:15054084-15054383	AT2G35840,	1	+	0	1	0	0	1	0	2	2	0	0	7	3	1	1	0	0
3:1119331-1120205	AT3G04240,	5	-	0	0	1	0	1	1	4	5	0	0	1	2	2	0	0	1
3:2148643-2148884	AT3G06810,	1	+	0	0	2	0	2	0	2	6	1	0	0	1	1	0	2	1
4:8660055-8660960	AT4G15180,	4	+	1	1	1	1	0	2	2	3	0	1	1	2	1	1	0	1
4:10957705-10958269	AT4G20300,	2	+	2	2	1	0	0	6	0	0	0	1	0	0	1	2	1	2
5:715301-715988	AT5G03050,	4	-	0	1	0	0	0	1	4	3	0	0	0	0	2	3	2	2
5:1252896-1253134	AT5G04430,	1	-	3	0	1	2	1	1	1	2	0	2	1	2	1	0	1	0
5:15023284-15025974	n/a		+	0	0	0	0	5	2	0	1	0	2	0	0	3	2	2	1
5:19348781-19349055	AT5G47780,	1	+	0	1	0	4	2	0	2	1	0	0	0	1	1	2	2	2
5:20691738-20692199	AT5G50850,	3	+	0	1	0	3	0	0	5	0	0	0	1	0	1	3	1	3
5:23006575-23007205	AT5G56870,	3	+	0	0	10	2	1	0	0	0	0	0	0	0	1	0	1	3
1:7879636-7880684	AT1G22300,	4	-	1	0	1	0	4	2	3	3	1	0	0	0	0	1	0	2
1:8594446-8594697	AT1G24260,	2	-	0	0	0	0	0	0	0	0	0	0	0	0	0	3	9	6
1:16797274-16797830	AT1G44170,	3	-	0	0	0	0	0	2	2	4	0	0	2	1	0	2	3	2
1:26132140-26132533	AT1G69526,	1	+	2	0	0	1	1	0	0	1	0	4	4	2	0	1	1	1
2:8435740-8436038	AT2G19470,	2	-	0	2	1	3	2	2	2	1	1	1	0	0	0	1	0	2
2:11413187-11414082	AT2G26780,	5	+	3	2	1	1	0	2	2	3	0	1	1	0	0	2	0	0
3:213716-213993	AT3G01540,	1	-	0	0	0	0	0	3	5	4	0	1	2	1	0	1	0	1
3:1009483-1009824	AT3G03920,	2	-	3	3	0	3	1	0	1	3	2	0	0	0	0	1	1	0
3:1918679-1918991	AT3G06330,	1	+	0	2	1	0	1	0	1	5	0	0	2	2	0	2	0	2
3:6142473-6142819	AT3G17930,	2	-	0	2	2	1	1	0	1	2	1	0	2	1	0	2	0	3
4:7366285-7366443	AT4G12430,	1	-	0	2	0	0	0	0	7	2	0	0	0	2	0	1	3	1
4:8169645-8170551	AT4G14160,	4	+	0	2	0	2	1	0	0	3	0	0	0	4	0	2	1	3
4:11512771-11512981	AT4G21670,	1	+	0	2	0	0	1	0	0	2	0	0	5	3	0	2	2	1
4:12782449-12782918	AT4G24800,	2	+	1	3	0	0	0	3	1	3	0	1	2	1	0	1	1	1
4:16500819-16501369	AT4G34540,	2	+	0	1	2	3	0	3	2	0	0	1	1	1	0	2	2	0
4:16932185-16932497	AT4G35730,	2	+	3	2	1	1	0	2	2	2	0	0	1	1	0	3	0	0
5:2141179-2141654	AT5G06910,	3	+	0	4	3	0	0	0	4	4	0	0	0	0	0	1	0	2
5:6697776-6698423	AT5G19820,	4	-	1	0	4	2	0	2	0	2	0	0	2	0	0	1	3	1
5:25989942-25990325	AT5G65060,	3	+	0	0	2	1	1	2	4	0	2	2	1	1	0	2	0	0
1:2838545-2838692	AT1G08840,	1	-	2	1	0	0	6	0	3	0	0	2	1	0	0	0	3	0
1:6094168-6094605	AT1G17720,	3	-	0	0	0	0	3	3	5	4	1	0	0	1	0	0	1	0
2:14352472-14355545	AT2G33980,	4	-	0	1	0	0	0	1	3	7	0	0	2	0	0	0	3	1
2:16503281-16503745	AT2G39550,	3	+	0	2	0	0	2	2	3	3	0	1	2	1	0	0	2	0
3:300661-301051	AT3G01850,	3	-	0	3	0	2	0	2	2	1	0	0	1	2	0	0	3	2
3:20554160-20554649	AT3G55440,	2	+	0	1	0	0	2	1	7	5	0	0	0	1	0	0	1	0
4:5246283-5246756	AT4G08300,	2	+	0	0	0	0	1	3	1	0	2	0	0	5	0	0	4	2
4:12594837-12595540	AT4G24290,	2	+	0	0	1	1	0	1	4	5	0	0	0	3	0	0	2	1
4:15347024-15347288	AT4G31700,	2	-	0	0	2	2	2	1	1	3	0	0	2	1	0	0	4	0
5:359784-360446	AT5G01920,	2	+	1	1	1	4	0	1	0	0	0	2	0	1	0	0	5	2
5:9418604-9418903	AT5G26780,	2	+	0	5	1	0	1	5	2	3	0	0	0	0	0	0	1	0
3:10334414-10334605	AT3G27870,	1	+	0	0	1	1	1	0	0	2	0	1	2	4	0	0	0	6
5:19097227-19098305	AT5G47040,	4	-	0	1	0	5	0	0	1	3	2	1	3	1	0	0	0	1
4:7806929-7807443	AT4G13430,	2	-	1	3	1	2	0	2	2	5	0	1	1	0	0	0	0	0
3:5566479-5572941	n/a		+	1	2	5	0	2	7	0	1	0	0	0	0	0	0	0	0
2:8856410-8857575	AT2G20570,	5	-	5	0	4	9	0	0	0	0	0	0	0	0	0	0	0	0
1:1627828-1628058	AT1G05500,	1	+	0	0	3	0	1	0	2	2	0	0	0	3	2	3	1	0
1:2437993-2438556	AT1G07890,	3	+	0	0	2	1	2	5	3	0	0	0	0	1	2	0	0	1
1:3095782-3096072	AT1G09570,	1	-	1	2	0	0	1	0	4	4	0	0	0	1	1	0	1	2
2:9974456-9974753	AT2G23420,	2	+	0	3	0	0	0	1	0	1	0	0	0	4	2	1	5	0
4:7110049-7110409	AT4G11820,	3	-	0	2	1	0	0	1	0	3	0	0	0	0	1	4	5	0
4:15651351-15652156	AT4G32420,	3	-	0	0	2	0	1	1	3	3	0	2	0	0	2	1	0	2
5:4051378-4051531	AT5G12840,	0	-	0	1	1	2	1	0	0	0	0	0	1	0	1	0	6	4
5:5284624-5285084	AT5G16190,	2	-	2	0	0	0	1	0	0	0	0	0	0	0	1	3	6	4
5:9440627-9441382	AT5G26830,	4	+	0	1	1	0	0	0	1	2	1	0	1	0	2	3	1	4
5:17016195-17016404	AT5G42560,	1	+	0	1	1	3	1	1	1	1	2	0	0	1	3	2	0	0
5:25353340-25354416	AT5G63220,	6	-	3	4	0	0	0	1	0	2	1	0	2	1	1	2	0	0
5:26359491-26359889	AT5G65900,	3	+	0	0	0	0	1	0	2	2	0	0	0	0	4	3	5	0
1:2450208-2450566	AT1G07910,	2	+	0	0	0	1	0	6	2	0	0	0	0	1	0	2	2	3
1:23658416-23658786	AT1G63770,	2	-	0	1	0	1	0	0	9	1	1	0	0	1	0	2	0	1
1:24065760-24066158	AT1G64790,	2	-	1	1	1	1	1	0	0	3	0	1	0	2	0	4	2	0
2:9690536-9690733	AT2G22780,	2	-	1	0	2	0	4	3	0	3	1	0	0	0	0	1	0	2
2:13867526-13867997	AT2G32700,	2	+	2	0	1	3	0	0	3	2	1	0	1	1	0	1	1	1
3:17171456-17172914	n/a		-	0	0	0	0	2	5	2	6	0	0	0	0	0	2	0	0
3:19585213-19585902	AT3G52840,	2	+	0	2	0	6	0	2	0	2	0	0	1	3	0	1	0	0
3:21681339-21681534	AT3G58620,	1	+	0	0	2	1	2	2	7	0	0	0	0	0	0	2	0	1
5:6024616-6025209	AT5G18230,	3	-	0	0	4	0	1	5	0	0	0	0	0	0	0	4	2	1
5:6180624-6180926	AT5G18590,	2	-	0	1	2	0	0	0	0	1	0	1	1	1	0	2	5	3
5:23231371-23232065	AT5G57350,	3	-	2	0	0	1	0	0	1	0	0	4	3	2	0	1	3	0
1:766280-767266	n/a		+	1	0	0	2	1	5	0	2	0	0	0	1	0	0	4	1
1:2261740-2262354	AT1G07360,	2	-	0	0	1	1	0	2	4	0	0	2	3	1	0	0	1	2
1:5623241-5623635	AT1G16470,	3	+	1	0	0	0	1	2	2	2	0	2	2	3	0	0	1	1
2:15510368-15510719	AT2G36930,	2	-	0	2	0	0	0	4	1	3	0	1	3	1	0	0	1	1
3:1207651-1207968	AT3G04490,	2	+	0	0	5	2	0	4	0	0	0	0	2	1	0	0	2	1
3:9114469-9115178	AT3G25013,	4	+	0	0	2	0	0	0	3	3	0	0	4	2	0	0	3	0
4:9427450-9428422	AT4G16760,	5	-	0	2	5	1	0	1	2	2	0	1	2	0	0	0	1	0
4:10232842-10233436	AT4G18570,	3	+	0	1	0	0	3	6	2	1	0	0	0	0	0	0	1	3
5:7938092-7938442	AT5G23540,	2	+	0	1	1	1	0	2	0	7	1	0	0	2	0	0	2	0
5:15441875-15442126	AT5G38560,	2	+	0	1	2	0	0	1	4	4	0	0	1	0	0	0	4	0
1:17158774-17159520	n/a		-	1	0	1	1	1	0	1	4	0	2	4	1	0	0	0	1
4:8250488-8251167	AT4G14340,	4	-	1	1	0	3	2	3	1	0	3	1	1	0	0	0	0	1
3:2788725-2789568	AT3G09100,	4	-	1	3	0	3	2	0	1	3	0	1	1	2	0	0	0	0
4:6526748-6527639	AT4G10570,	4	-	2	0	2	1	3	2	1	1	0	0	3	2	0	0	0	0
2:12005547-12005723	AT2G28160,	1	+	0	1	1	0	1	2	3	4	0	1	3	1	0	0	0	0
1:14160752-14160909	AT1G37130,	1	-	0	0	2	1	0	0	2	9	1	0	0	2	0	0	0	0
2:8857408-8857575	AT2G20570,	1	-	0	0	2	0	0	0	0	0	2	1	6	6	0	0	0	0
3:1462441-1462783	AT3G05165,	2	-	0	0	1	0	1	1	5	5	0	1	2	1	0	0	0	0
Mt:189281-189521	n/a		+	0	0	0	2	0	0	0	3	0	0	2	10	0	0	0	0
3:22035422-22035756	AT3G59660,	2	-	1	0	0	1	0	3	5	6	0	0	0	1	0	0	0	0
1:12974193-12974552	n/a		-	0	0	0	0	1	7	4	5	0	0	0	0	0	0	0	0
5:18266990-18267148	AT5G45160,	1	+	4	2	0	0	2	1	2	6	0	0	0	0	0	0	0	0
1:448812-448973	AT1G02280,	1	-	0	2	2	1	0	0	0	3	1	0	2	2	1	1	1	0
1:12145687-12145942	AT1G33470,	1	+	0	0	1	3	3	0	2	2	0	0	0	0	1	0	4	0
1:19412273-19412428	AT1G52150,	1	-	0	0	2	0	1	0	0	3	0	0	3	2	1	0	1	3
2:8812466-8812665	AT2G20440,	1	-	0	2	1	0	0	1	5	1	0	0	3	0	1	0	2	0
3:315113-315862	AT3G01910,	3	-	1	1	2	2	0	2	2	0	0	0	1	1	1	1	1	1
3:2553005-2553285	AT3G07990,	2	+	0	1	1	0	0	5	0	1	0	0	1	0	2	0	5	0
3:17171839-17172914	n/a		-	0	0	0	0	2	6	3	3	0	0	0	0	1	0	1	0
4:16176666-16176937	AT4G33700,	1	-	0	0	1	1	0	0	0	2	2	3	1	0	3	1	1	1
4:16954237-16954705	AT4G35785,	3	-	0	0	0	0	4	3	2	3	0	0	0	0	1	0	1	2
5:9724799-9725177	AT5G27540,	3	+	0	1	1	0	1	1	2	1	0	1	0	5	1	0	0	2
5:9862215-9862537	AT5G27830,	1	+	0	0	0	3	0	0	2	1	1	2	4	1	1	1	0	0
5:26422591-26422743	AT5G66070,	1	+	0	0	1	1	1	3	4	0	0	0	1	3	1	0	0	1
1:1125995-1126673	AT1G04230,	3	+	0	1	3	1	1	2	0	3	0	0	0	1	0	2	2	0
1:7008413-7008824	AT1G20225,	2	-	0	4	2	0	3	0	0	0	0	1	1	0	0	1	3	1
1:12381927-12382649	n/a		-	1	0	0	0	3	2	3	1	0	0	0	0	0	2	4	0
1:18695929-18696718	AT1G50460,	4	+	0	0	1	2	6	0	5	0	0	0	0	0	0	1	1	0
1:20724108-20724717	AT1G55510,	4	+	1	3	0	2	3	0	3	0	0	0	0	0	0	4	0	0
1:27704533-27704776	AT1G73680,	1	-	0	0	0	1	0	0	0	0	0	0	6	2	0	3	3	1
1:29828992-29829371	AT1G79280,	2	-	0	1	0	4	0	3	2	0	0	0	0	2	0	2	0	2
2:1283498-1283909	AT2G04030,	3	+	0	2	0	2	1	0	0	1	0	1	2	2	0	3	0	2
2:8280926-8281183	AT2G19110,	1	+	0	0	0	0	0	0	1	3	0	0	2	2	0	2	5	1
2:19500690-19501458	AT2G47510,	5	+	2	1	0	4	1	2	0	2	0	1	0	0	0	1	1	1
3:5810515-5810965	AT3G17040,	2	-	2	2	2	0	0	0	0	0	0	1	0	4	0	3	0	2
3:17714827-17715403	AT3G47990,	2	-	0	2	0	0	0	0	1	7	0	2	0	2	0	1	0	1
3:19048817-19049126	AT3G51310,	2	-	0	2	0	3	1	0	0	1	0	0	1	0	0	2	2	4
5:644939-645520	AT5G02830,	3	-	0	1	2	1	0	3	1	0	0	1	0	3	0	1	2	1
5:6753369-6757914	n/a		+	0	0	0	0	0	0	0	7	0	0	4	4	0	1	0	0
5:6762946-6763611	AT5G20020,	3	+	0	1	2	1	0	2	0	1	0	0	1	0	0	5	2	1
5:9668425-9668617	AT5G27380,	1	-	0	0	0	0	1	0	4	8	0	0	0	1	0	1	1	0
5:13110849-13111249	AT5G34850,	1	-	0	0	2	3	1	0	1	1	0	1	3	2	0	1	1	0
5:15065605-15067645	AT5G37850,	6	+	1	0	2	1	1	4	2	2	0	1	0	0	0	1	0	1
5:16823584-16824040	AT5G42080,	3	-	0	0	2	0	0	4	1	4	0	0	0	0	0	1	4	0
5:20235772-20236030	AT5G49800,	1	-	0	0	2	3	0	3	0	0	0	0	0	0	0	2	4	2
1:5297892-5298107	AT1G05163,AT1G15405,	1	+	0	0	0	0	0	0	11	0	0	0	0	0	0	0	5	0
1:5623241-5623465	AT1G16470,	2	+	0	2	2	0	0	0	2	5	0	0	1	2	0	0	2	0
1:12381927-12382791	n/a		-	0	0	0	3	0	4	3	2	0	0	0	2	0	0	1	1
1:24065561-24066158	AT1G64790,	3	-	0	1	0	0	1	0	1	2	0	1	2	0	0	0	5	3
1:28152512-28152849	AT1G74960,	2	-	4	1	2	3	0	0	1	0	1	1	0	0	0	0	1	2
1:29861830-29862276	AT1G79380,	3	+	0	0	3	2	0	1	3	1	1	0	0	1	0	0	2	2
2:11956996-11957711	AT2G28070,	3	+	2	0	1	2	1	0	2	1	0	1	0	0	0	0	3	3
2:15740064-15740666	AT2G37500,	4	-	0	0	1	5	0	3	0	3	0	0	0	0	0	0	4	0
3:2049351-2049653	AT3G06580,	2	-	0	1	0	2	0	3	1	4	0	0	0	0	0	0	2	3
3:2553005-2553451	AT3G07990,	3	+	0	0	2	2	1	0	3	1	0	1	0	3	0	0	2	1
4:12657713-12658159	AT4G24490,	2	-	0	4	5	1	1	1	0	0	0	0	0	1	0	0	1	2
5:5599676-5600094	AT5G17020,	3	+	1	0	0	0	1	1	1	3	0	0	2	0	0	0	7	0
1:23974874-23975354	n/a		-	0	0	1	0	3	4	0	5	1	0	1	0	0	0	0	1
2:16292373-16292668	AT2G39010,	1	+	3	2	0	0	0	1	0	0	1	2	1	5	0	0	0	1
3:1361360-1361949	AT3G04920,	2	+	0	1	0	2	2	5	0	5	0	0	0	0	0	0	0	1
3:22098843-22098989	AT3G59820,	1	-	0	0	2	0	0	1	3	2	0	1	2	4	0	0	0	1
4:674627-674998	AT4G01550,	1	-	0	0	0	0	1	2	0	7	0	0	2	3	0	0	0	1
4:14897975-14898376	AT4G30480,	2	+	0	0	2	2	0	1	7	0	0	0	2	0	0	0	0	2
5:6975475-6975762	AT5G20630,	1	+	1	3	0	5	0	0	0	0	0	4	2	0	0	0	0	1
4:16973183-16973425	AT4G35830,	1	-	0	1	1	2	1	2	4	3	0	0	1	1	0	0	0	0
5:18384962-18385138	AT5G45360,	1	-	0	2	4	0	3	0	2	2	0	0	3	0	0	0	0	0
3:3486104-3486565	AT3G11130,	2	-	1	0	1	0	1	0	12	1	0	0	0	0	0	0	0	0
5:16812096-16812471	AT5G42030,	3	-	4	3	0	2	0	0	1	3	2	1	0	0	0	0	0	0
1:383395-383688	AT1G02080,	2	+	1	1	3	2	0	3	2	3	0	1	0	0	0	0	0	0
1:10075640-10075858	AT1G28670,	1	-	1	4	3	4	0	0	0	0	0	1	0	3	0	0	0	0
1:26485867-26486134	AT1G70310,	1	-	3	2	5	0	0	0	0	4	0	1	1	0	0	0	0	0
1:26535647-26536517	AT1G70410,	3	-	1	0	7	3	0	1	0	2	0	2	0	0	0	0	0	0
2:9581506-9582430	AT2G22540,	5	+	0	0	0	1	0	0	2	7	0	1	3	2	0	0	0	0
4:11562071-11562654	AT4G21760,	3	+	0	0	0	0	4	6	3	2	0	1	0	0	0	0	0	0
Pt:419-37035	n/a		+	0	0	0	0	0	0	0	0	0	16	0	0	0	0	0	0
1:26786211-26786594	AT1G71010,	2	+	0	0	4	2	1	2	1	5	0	0	0	1	0	0	0	0
4:17281897-17282607	AT4G36648,	2	-	0	0	0	0	0	2	5	7	0	0	0	2	0	0	0	0
3:5399603-5399968	AT3G15950,	3	-	0	0	3	1	2	4	4	2	0	0	0	0	0	0	0	0
4:7741864-7742145	AT4G13290,	1	+	0	0	0	0	2	3	6	5	0	0	0	0	0	0	0	0
2:18094776-18094927	AT2G43620,	1	+	0	0	6	10	0	0	0	0	0	0	0	0	0	0	0	0
1:251143-251440	AT1G01690,	3	+	1	0	1	0	3	2	2	4	0	0	0	0	1	1	0	0
1:964952-965309	AT1G03830,	2	-	1	0	0	1	0	1	0	0	0	1	1	1	1	1	0	7
1:1038519-1039085	AT1G04020,	3	+	0	1	0	0	1	0	3	1	0	0	0	0	1	1	5	2
1:4181853-4182900	n/a		-	0	1	0	0	0	1	0	5	0	0	4	0	1	1	0	2
1:10351520-10351797	AT1G29630,	2	+	1	0	0	0	1	0	2	0	0	0	1	0	1	3	4	2
1:29569899-29570192	AT1G78610,	1	-	0	2	1	1	0	0	0	2	0	1	1	1	2	0	4	0
1:29848893-29849213	AT1G79350,	2	-	0	2	0	3	0	0	2	0	0	1	0	1	1	0	2	3
2:5652689-5653327	AT2G13560,	3	+	0	2	0	0	1	3	2	3	0	0	0	1	3	0	0	0
2:12065000-12065284	AT2G28290,	2	+	0	1	1	0	2	2	1	1	0	0	2	1	1	1	2	0
2:13616727-13616906	AT2G32000,	1	-	0	3	0	2	1	0	2	1	2	0	0	0	4	0	0	0
2:18984938-18985186	AT2G46230,	2	-	0	3	3	1	0	0	0	1	0	0	0	0	2	2	3	0
3:4220289-4221149	AT3G13120,	2	-	2	2	1	0	0	0	0	0	0	3	0	1	1	0	3	2
3:7130964-7131172	AT3G20450,	1	+	0	0	0	0	1	4	2	5	0	0	0	0	2	0	0	1
3:15235834-15236310	AT3G43300,	2	-	0	0	2	0	0	2	2	2	0	0	1	2	3	0	1	0
3:16930252-16930532	AT3G46100,	2	-	0	2	1	0	0	2	1	1	1	1	0	2	2	0	0	2
3:19503598-19503840	AT3G52580,	2	+	0	2	0	2	1	2	4	1	0	0	0	1	1	0	1	0
3:22900266-22901255	AT3G61860,	4	-	2	1	1	0	1	2	4	0	0	1	0	0	1	1	1	0
4:677916-678158	AT4G01560,	2	-	0	0	2	1	1	2	2	2	0	0	0	0	1	1	3	0
4:942340-942543	AT4G02120,	2	+	0	0	0	2	2	2	1	1	0	0	0	3	3	0	0	1
4:6271407-6271974	AT4G10030,	4	-	1	1	0	4	0	1	0	1	0	2	0	0	1	2	1	1
4:8867229-8867408	AT4G15530,	1	-	0	0	4	3	0	0	0	0	0	1	0	1	2	0	1	3
4:17803724-17803902	AT4G37870,	1	-	0	2	2	4	0	0	2	3	1	0	0	0	1	0	0	0
5:3678156-3678458	AT5G11500,	2	+	0	0	1	0	2	0	0	4	1	0	0	0	1	2	4	0
5:9439237-9439667	AT5G26830,	3	+	0	0	1	2	0	4	3	3	0	0	0	0	2	0	0	0
5:9447745-9448181	AT5G26850,	1	+	0	0	4	1	0	0	1	3	0	0	0	0	2	2	0	2
5:9807758-9808082	AT5G27700,	2	-	0	1	1	1	0	1	4	2	0	0	0	1	1	0	2	1
5:25952509-25953337	AT5G64940,	5	+	0	1	0	1	0	0	1	0	0	0	2	3	2	1	1	3
1:2582370-2583038	AT1G08220,	3	-	0	1	2	0	0	3	2	2	0	0	0	0	0	2	3	0
1:10733860-10734012	AT1G30400,	1	+	0	2	0	0	0	4	0	4	0	0	2	0	0	2	1	0
1:10812007-10812591	AT1G30520,	3	+	2	3	2	1	0	0	0	0	1	0	0	1	0	2	1	2
1:21327729-21328375	AT1G57590,	4	-	1	1	0	0	0	0	1	1	2	0	5	3	0	1	0	0
1:27850329-27850746	AT1G74060,	2	-	0	0	4	2	0	2	4	0	0	0	0	0	0	1	1	1
1:30209447-30209612	AT1G80360,	1	-	0	2	0	0	3	3	1	0	0	0	0	2	0	4	0	0
2:14969232-14969755	AT2G35630,	3	+	0	1	0	1	1	1	0	1	0	0	0	0	0	2	5	3
3:3710938-3711302	AT3G11730,	3	-	0	0	1	0	3	5	2	0	0	0	0	0	0	2	2	0
3:4821788-4822309	AT3G14420,	2	+	0	1	3	1	0	0	0	0	0	0	7	2	0	1	0	0
3:5557252-5557709	AT3G16370,	2	+	0	0	0	8	0	0	0	0	0	1	0	0	0	2	1	3
3:7110566-7111284	AT3G20390,	3	-	0	0	0	0	1	1	2	2	1	0	0	0	0	1	4	3
3:16311825-16314011	n/a		+	1	0	0	0	4	4	2	2	0	0	0	0	0	1	0	1
3:17307416-17307809	AT3G46980,	2	-	0	4	0	1	0	0	3	3	0	0	1	1	0	1	0	1
3:18801057-18801224	AT3G50630,	1	+	0	0	0	1	0	3	4	0	0	0	0	0	0	4	3	0
3:20596533-20597034	AT3G55530,	3	-	0	1	0	1	0	1	0	2	0	1	0	0	0	1	8	0
3:20650520-20651295	AT3G55660,	3	-	0	2	0	0	4	6	0	0	0	0	0	0	0	2	1	0
4:9866028-9866524	AT4G17730,	3	+	0	0	0	1	2	1	2	3	0	0	1	2	0	1	1	1
4:14353547-14353729	AT4G29130,	1	-	0	1	0	0	0	1	2	1	2	0	2	0	0	1	4	1
5:5173191-5175995	AT5G15845,	5	+	0	0	2	2	0	1	0	1	0	0	3	1	0	1	3	1
5:8456886-8457201	AT5G24690,	2	-	1	0	0	2	1	0	0	3	0	4	0	0	0	1	3	0
5:20754365-20755645	AT5G51050,	4	+	0	0	0	0	0	0	0	0	0	2	0	0	0	3	7	3
1:5218521-5218911	AT1G15165,	2	-	0	0	0	0	1	3	1	0	0	0	5	2	0	0	3	0
1:16872237-16872480	AT1G44575,	1	+	3	0	1	1	0	0	0	0	0	1	1	4	0	0	2	2
1:18582615-18582966	AT1G50170,	2	+	0	0	0	0	1	2	3	4	0	0	0	0	0	0	5	0
1:20291302-20291595	AT1G54360,	2	+	0	1	0	0	0	3	0	4	0	0	0	0	0	0	2	5
1:20841584-20841969	AT1G55750,	2	-	1	0	3	2	2	0	1	0	0	0	2	0	0	0	2	2
1:20863028-20863419	AT1G55810,	3	+	2	0	1	4	2	1	1	0	0	0	2	0	0	0	2	0
1:27459128-27459315	AT1G72990,	1	-	2	1	0	0	0	1	0	3	0	2	0	2	0	0	2	2
2:2361678-2361983	AT2G06050,	2	-	0	0	1	0	0	0	2	0	0	2	0	2	0	0	6	2
2:8980118-8980329	AT2G20860,	1	+	0	2	2	1	0	2	3	1	0	0	2	0	0	0	2	0
2:12769886-12770272	AT2G29960,	3	-	0	1	0	0	1	6	1	4	0	0	0	0	0	0	1	1
2:15001778-15002155	AT2G35690,	2	+	0	2	1	0	0	3	0	0	0	2	5	0	0	0	2	0
2:16659080-16659817	AT2G39900,	4	+	0	0	0	0	4	3	2	2	0	0	0	0	0	0	2	2
3:16228279-16228498	AT3G44680,	1	-	0	0	1	1	1	3	1	0	0	0	3	1	0	0	2	2
4:6663934-6664511	n/a		+	1	0	0	2	1	3	0	4	0	0	1	0	0	0	2	1
4:14961208-14961607	AT4G30690,	3	+	0	1	2	2	0	0	1	0	1	1	0	1	0	0	3	3
5:3859254-3859704	AT5G11960,	2	-	0	0	1	0	2	2	1	2	0	1	3	0	0	0	3	0
5:794380-794961	AT5G03290,	2	+	0	0	1	0	1	1	3	3	0	0	2	2	0	0	0	2
5:3756817-3757089	AT5G11670,	2	+	0	1	0	1	0	2	3	4	0	0	3	0	0	0	0	1
1:12598689-12600110	AT1G34460,	5	+	0	0	0	0	0	15	0	0	0	0	0	0	0	0	0	0
5:15378136-15384895	n/a		-	0	0	15	0	0	0	0	0	0	0	0	0	0	0	0	0
4:14617170-14617713	AT4G29900,	3	-	2	0	0	0	3	4	0	3	0	1	0	2	0	0	0	0
1:5297910-5298178	AT1G05163,	1	+	0	0	0	1	0	0	4	8	0	0	2	0	0	0	0	0
1:9067152-9069092	AT1G26208,	2	-	0	0	0	0	0	0	4	1	0	0	3	7	0	0	0	0
2:2925621-2926524	AT2G07050,	4	+	0	0	5	1	3	1	2	2	0	0	1	0	0	0	0	0
3:7956137-7956444	AT3G22430,	1	+	0	1	0	0	0	0	3	3	0	0	5	3	0	0	0	0
5:4287526-4287861	AT5G13370,	2	+	1	0	1	1	0	0	4	5	0	0	3	0	0	0	0	0
3:2840946-2841363	AT3G09260,	3	-	0	0	0	1	1	8	4	1	0	0	0	0	0	0	0	0
3:5579530-5579760	AT3G16420,	1	+	0	0	2	2	4	2	1	4	0	0	0	0	0	0	0	0
Mt:11504-12086	n/a		-	0	0	0	0	0	0	15	0	0	0	0	0	0	0	0	0
1:11133927-11134125	AT1G31170,	2	+	1	0	0	0	1	0	0	3	1	0	3	0	1	1	3	0
1:21043704-21043889	AT1G56220,	1	+	0	0	1	5	0	0	0	3	1	1	0	1	1	0	1	0
1:29660399-29660540	AT1G78900,	1	+	0	4	2	1	4	0	1	0	0	0	0	0	1	1	0	0
2:10418210-10418653	AT2G24520,	3	+	0	2	4	1	0	3	0	1	0	1	0	0	1	0	0	1
3:497918-498233	AT3G02420,	2	-	0	3	1	1	0	0	0	4	0	0	2	0	1	0	1	1
3:3103168-3103571	AT3G10060,	3	+	1	1	0	4	0	1	0	0	0	0	1	1	1	2	1	1
3:4522946-4523096	AT3G13772,	1	-	0	0	0	1	1	4	0	4	0	0	0	2	2	0	0	0
3:6969655-6970107	AT3G20000,	3	+	4	0	2	0	0	0	0	0	0	1	2	3	2	0	0	0
3:7443430-7444205	AT3G21215,	3	-	1	0	0	1	3	1	1	4	0	0	0	0	1	1	0	1
3:9723472-9723688	AT3G26520,	1	+	0	1	2	0	1	1	1	1	0	1	0	1	1	2	2	0
3:9828148-9828300	AT3G26740,	1	+	1	0	1	1	0	0	0	1	0	0	4	4	1	1	0	0
3:19679997-19680237	AT3G53090,	1	+	0	1	0	0	2	0	0	1	0	2	0	4	1	2	1	0
3:22262378-22262699	AT3G60240,	2	+	0	1	0	0	0	0	0	2	0	1	0	2	1	1	5	1
3:22970055-22970338	AT3G62010,	1	+	1	0	0	0	0	0	2	3	0	1	0	0	1	1	3	2
4:4977-5588	AT4G00020,	2	-	0	5	0	0	1	0	0	2	1	1	0	1	2	1	0	0
4:7552595-7552817	AT4G12910,	1	-	0	1	0	0	0	0	1	2	2	2	3	1	1	0	1	0
4:8660055-8660747	AT4G15180,	3	+	0	0	0	1	0	0	0	4	0	0	0	1	1	0	4	3
4:13530568-13530871	AT4G26940,	2	-	0	0	0	1	0	1	2	0	0	0	1	2	2	2	1	2
4:13543680-13544485	AT4G26970,	4	+	0	0	2	2	1	0	0	0	2	0	0	3	1	0	2	1
4:13951809-13952124	AT4G28080,	2	-	0	0	0	4	0	0	0	0	1	0	5	3	1	0	0	0
4:15144869-15145446	AT4G31150,	3	-	0	0	0	1	4	3	0	2	0	0	0	0	1	1	2	0
5:15023284-15023913	AT5G37793,	1	+	0	1	0	1	4	1	1	0	0	2	0	0	1	2	0	1
5:17615246-17615388	AT5G43810,	1	+	0	1	0	1	0	4	0	3	0	1	2	1	1	0	0	0
5:24889296-24889564	AT5G61970,	2	+	0	1	0	1	1	4	5	1	0	0	0	0	1	0	0	0
5:26841288-26841647	AT5G67270,	2	-	2	0	3	0	0	2	2	2	0	0	0	0	1	1	1	0
1:2638907-2639309	AT1G08370,	2	+	0	1	1	0	0	1	4	1	1	0	0	2	0	2	0	1
1:5363938-5364252	AT1G15570,	2	+	0	3	0	1	0	2	5	0	0	0	0	0	0	2	1	0
1:7435281-7435439	AT1G21240,	1	+	0	0	0	0	0	0	0	0	0	0	9	4	0	1	0	0
1:21031092-21031432	AT1G56200,	2	+	0	0	2	2	2	0	0	2	0	0	1	0	0	2	2	1
1:22021350-22021834	AT1G59830,	3	-	0	1	0	1	0	1	3	2	1	0	2	0	0	2	0	1
1:22933453-22933647	AT1G62040,	2	+	1	1	0	1	1	2	4	2	0	0	0	0	0	2	0	0
2:269324-269872	AT2G01600,	3	+	1	1	0	0	0	0	2	3	0	1	0	0	0	1	4	1
2:318374-318610	AT2G01720,	0	-	0	0	0	1	0	2	3	2	0	0	0	0	0	2	0	4
2:14353899-14355545	AT2G33980,	3	-	1	1	0	3	0	1	2	0	0	0	0	3	0	2	0	1
2:18185018-18185878	AT2G43910,	5	-	0	1	7	3	0	0	0	0	0	0	0	0	0	3	0	0
3:4523171-4523682	AT3G13772,	3	-	0	1	0	0	3	3	1	2	0	0	1	0	0	2	1	0
3:6823928-6824171	AT3G19650,	1	+	0	0	0	0	1	1	0	5	0	0	0	0	0	2	4	1
3:16309808-16311208	n/a		+	0	1	0	0	0	9	0	1	0	1	0	0	0	2	0	0
3:17667337-17667696	AT3G47890,	2	-	0	2	1	0	1	0	1	0	0	0	1	0	0	1	3	4
3:22098476-22098989	AT3G59820,	3	-	1	1	0	1	0	3	1	1	0	0	0	1	0	1	2	2
4:13309694-13310243	AT4G26300,	3	-	0	2	1	0	0	1	1	1	2	0	1	0	0	1	4	0
4:15644671-15644860	AT4G32410,	1	-	0	2	1	0	1	4	2	0	0	0	0	1	0	3	0	0
5:891722-891934	AT5G03540,	1	+	0	0	2	0	0	3	2	0	0	1	0	0	0	1	5	0
5:4226585-4227201	AT5G13240,	4	-	0	0	0	0	2	0	2	4	0	0	3	1	0	1	0	1
5:9401401-9401660	AT5G26751,	2	-	1	1	1	0	1	1	0	1	0	0	5	1	0	2	0	0
5:16493281-16493717	AT5G41210,	3	-	0	1	0	3	0	0	1	1	0	0	3	0	0	1	3	1
5:17386425-17386576	AT5G43320,	1	-	0	1	0	1	1	0	0	3	0	2	0	0	0	1	3	2
5:19271916-19272745	AT5G47500,	3	-	0	0	0	0	4	2	0	2	0	0	0	0	0	2	2	2
5:25854398-25854709	AT5G64680,	2	+	0	0	0	0	0	2	2	2	0	0	0	2	0	4	1	1
5:26941467-26941890	AT5G67530,	3	+	0	2	2	0	0	2	1	0	0	0	0	1	0	1	4	1
1:5743126-5743329	AT1G16780,	1	-	1	2	0	0	0	1	0	0	1	0	2	0	0	0	6	1
1:11160955-11161244	AT1G31230,	2	-	0	0	1	5	0	0	1	3	0	1	0	0	0	0	2	1
1:20882615-20882883	AT1G55860,	1	-	0	0	0	3	1	0	3	2	0	0	1	0	0	0	3	1
1:21597534-21597785	AT1G58250,	1	-	0	0	0	0	0	2	0	6	0	0	0	2	0	0	1	3
1:24490431-24490734	AT1G65840,	2	+	0	0	2	3	0	0	1	2	0	1	1	3	0	0	1	0
1:27524122-27524316	AT1G73200,	1	-	0	0	1	1	0	2	0	2	1	0	0	0	0	0	3	4
2:17736698-17737234	AT2G42600,	3	-	0	2	0	2	0	0	0	3	0	1	1	3	0	0	2	0
3:15664623-15664992	AT3G43810,	1	-	0	0	0	0	0	4	0	2	0	0	3	2	0	0	1	2
3:18156663-18157613	AT3G48980,	3	+	1	2	0	0	1	3	1	1	1	0	0	3	0	0	1	0
4:246373-246557	AT4G00570,	1	-	0	2	0	1	0	0	2	3	1	0	3	1	0	0	1	0
4:9172275-9172521	AT4G16190,	1	+	1	0	0	3	0	2	1	0	0	1	4	1	0	0	1	0
4:9866028-9866341	AT4G17730,	2	+	0	1	0	1	2	0	1	2	0	1	2	0	0	0	3	1
4:11426981-11427430	AT4G21450,	3	+	0	0	0	0	0	2	1	2	1	0	0	0	0	0	4	4
4:13233119-13233467	AT4G26110,	2	+	1	1	1	1	0	0	2	1	0	0	4	0	0	0	3	0
4:14029739-14030349	AT4G28360,	3	-	0	1	2	1	0	0	0	4	0	0	0	3	0	0	3	0
4:18379334-18380097	AT4G39540,	5	+	0	0	1	0	2	4	0	2	0	1	0	1	0	0	3	0
5:7792795-7794444	AT5G23155,	3	+	0	0	0	0	1	3	1	0	1	0	3	1	0	0	3	1
5:7944657-7944948	AT5G23570,	1	+	0	1	2	0	0	0	1	2	0	0	2	0	0	0	5	1
5:8351693-8352240	AT5G24450,	2	+	0	1	1	0	0	0	3	3	0	0	0	1	0	0	3	2
5:9265819-9266074	AT5G26570,	2	+	0	0	0	2	0	1	0	4	0	1	1	3	0	0	1	1
5:16822446-16824040	AT5G42080,	8	-	0	3	0	0	3	4	2	0	0	0	0	0	0	0	2	0
5:18279522-18280078	AT5G45190,	2	-	0	3	0	2	0	0	0	1	1	0	0	2	0	0	5	0
5:19261818-19262349	AT5G47480,	2	+	0	1	4	0	0	1	0	1	0	1	2	0	0	0	1	3
5:24296464-24296970	AT5G60410,	2	+	0	0	1	2	0	2	0	3	0	0	2	1	0	0	2	1
5:25686782-25688253	AT5G64220,	5	+	0	0	1	1	0	2	0	6	1	0	0	0	0	0	3	0
1:24547704-24548101	AT1G65950,	2	-	0	4	0	1	0	2	1	5	0	0	0	0	0	0	0	1
4:16164428-16165240	AT4G33650,	4	+	0	0	0	3	3	1	3	1	0	0	0	1	0	0	0	2
5:4865208-4865571	AT5G15020,	2	-	0	1	1	0	0	1	2	2	0	1	1	2	0	0	0	3
5:25608001-25608178	AT5G63970,	1	-	0	0	0	0	0	3	4	3	0	0	3	0	0	0	0	1
4:8269456-8269638	AT4G14360,	1	-	3	0	1	1	0	3	4	1	0	0	1	0	0	0	0	0
3:9656078-9656389	AT3G26360,	1	-	0	0	2	0	4	1	0	3	0	2	1	1	0	0	0	0
3:23412428-23413001	AT3G63400,	4	+	0	0	3	4	0	4	0	3	0	0	0	0	0	0	0	0
2:11149064-11149304	AT2G26190,	2	-	0	0	0	0	0	1	4	2	0	1	0	6	0	0	0	0
4:11648129-11648278	AT4G21960,	1	+	1	1	0	1	0	5	0	5	0	1	0	0	0	0	0	0
4:14319762-14320054	AT4G29060,	1	+	1	2	4	2	0	0	0	1	0	1	1	2	0	0	0	0
1:20198162-20198465	AT1G54100,	2	-	0	0	0	1	0	0	2	2	0	0	5	4	0	0	0	0
2:12609312-12609629	AT2G29380,	1	+	0	0	0	0	0	0	9	3	0	0	1	1	0	0	0	0
5:7447176-7447417	AT5G22470,	1	+	2	1	3	5	0	0	0	0	0	0	3	0	0	0	0	0
5:21237618-21238154	AT5G52300,	1	+	0	0	0	0	0	0	8	3	0	0	1	2	0	0	0	0
5:22347625-22347853	AT5G55070,	2	+	1	2	0	0	4	1	3	2	0	0	0	1	0	0	0	0
1:4399105-4399458	AT1G12930,	2	-	0	0	3	5	1	4	1	0	0	0	0	0	0	0	0	0
3:2840946-2841246	AT3G09260,	2	-	0	0	0	2	2	1	3	6	0	0	0	0	0	0	0	0
3:5581798-5582030	AT3G16430,	1	+	0	0	0	1	3	4	3	3	0	0	0	0	0	0	0	0
1:28975481-28975810	AT1G77120,	2	+	0	0	0	0	0	0	5	9	0	0	0	0	0	0	0	0
1:740124-741065	AT1G03090,	4	+	1	1	1	4	0	1	0	0	0	0	0	0	3	0	1	1
1:949734-951211	AT1G03780,	7	-	0	1	1	1	1	3	0	0	0	0	0	0	3	2	1	0
1:3629845-3630064	AT1G10890,	1	+	1	0	5	1	0	0	0	1	1	1	0	0	1	0	2	0
1:5141172-5141696	AT1G14910,	3	-	3	2	1	0	2	1	0	0	0	0	0	1	1	0	0	2
1:19739138-19739505	AT1G52980,	2	+	0	0	0	0	1	0	1	5	0	1	1	0	3	0	1	0
1:20076661-20076975	AT1G53780,	1	-	0	2	1	1	0	0	1	0	0	0	1	2	1	0	3	1
1:20843303-20844064	AT1G55750,	3	-	0	1	1	0	0	3	3	2	0	0	0	0	1	1	1	0
1:22721192-22721601	AT1G61580,	1	-	0	1	2	0	0	1	1	1	0	1	1	1	4	0	0	0
1:26916366-26916934	AT1G71410,	3	-	0	2	0	1	1	0	2	0	0	0	0	0	2	3	2	0
2:6282027-6282610	AT2G14680,	3	+	0	3	1	0	0	1	0	4	0	0	0	1	1	0	0	2
2:13565727-13566218	AT2G31900,	3	-	0	0	0	0	2	1	2	2	0	0	1	0	1	3	1	0
2:15429671-15430327	AT2G36810,	4	-	0	0	1	3	0	0	0	0	0	1	1	2	1	0	0	4
2:16775979-16776150	AT2G40150,	1	+	0	1	0	0	0	2	3	2	0	0	0	0	2	1	2	0
2:16931572-16931806	AT2G40540,	1	+	0	0	2	3	1	0	0	0	0	0	0	0	2	0	3	2
2:19360258-19360608	AT2G47160,	1	-	0	1	1	0	0	0	0	0	0	0	0	0	1	0	2	8
3:2172734-2173195	AT3G06880,	2	-	0	3	1	1	0	0	1	0	0	0	1	0	1	1	2	2
3:3798834-3799641	AT3G11964,	4	-	2	1	0	1	2	1	0	2	0	0	0	0	1	0	2	1
3:8550574-8550767	AT3G23730,	1	+	0	1	2	2	0	0	0	0	0	0	0	0	1	5	1	1
3:9985474-9986347	AT3G27080,	4	-	1	0	0	1	0	0	4	1	0	0	3	0	3	0	0	0
3:18326595-18328527	AT3G49410,	7	+	0	2	2	1	0	2	0	1	0	0	0	0	1	2	2	0
3:22728135-22729216	AT3G61420,	5	-	1	1	1	0	0	2	2	1	0	2	0	0	1	0	2	0
3:23393186-23393438	AT3G63340,	2	-	0	1	0	1	2	1	0	0	0	0	0	2	1	0	3	2
4:16902256-16902629	AT4G35620,	2	+	0	1	0	0	0	2	4	0	0	1	0	0	1	3	1	0
4:16931494-16932497	AT4G35730,	5	+	1	3	1	0	3	0	0	0	0	0	0	0	3	0	0	2
5:936634-936894	AT5G03650,	2	+	0	0	0	0	0	0	0	5	0	3	0	0	1	1	0	3
5:4653472-4653899	AT5G14430,	2	+	0	0	2	0	0	2	2	1	0	0	0	1	1	0	2	2
5:15023284-15023873	AT5G37793,	1	+	0	1	0	2	0	1	2	0	0	0	0	0	3	2	2	0
5:17615246-17615902	AT5G43810,	4	+	1	2	0	1	0	2	2	0	0	1	0	0	1	1	0	2
5:20348833-20349230	AT5G50010,	1	+	0	1	0	0	1	3	0	0	0	0	0	0	1	1	4	2
5:25950353-25950692	AT5G64940,	2	+	0	0	0	1	0	0	0	0	1	3	0	2	2	1	1	2
1:6726456-6726605	AT1G19430,	1	-	0	2	1	0	0	5	0	0	0	0	0	1	0	2	2	0
1:17736395-17736579	AT1G48090,	1	-	1	2	1	0	1	1	0	0	0	0	3	0	0	2	2	0
1:29729513-29729841	AT1G79020,	2	-	0	1	0	1	1	0	0	0	0	2	2	0	0	3	3	0
2:9216698-9217120	AT2G21520,	2	+	0	1	0	1	0	2	3	0	1	0	0	1	0	3	0	1
2:10719145-10719422	AT2G25170,	2	+	0	0	0	1	0	0	4	2	0	0	0	1	0	1	0	4
2:14878674-14878939	AT2G35340,	2	+	1	0	0	0	1	2	2	0	0	0	0	0	0	1	5	1
2:16231625-16231896	AT2G38840,	1	+	0	3	0	0	1	1	1	1	0	0	0	2	0	1	0	3
2:17699554-17700524	AT2G42500,	5	-	0	3	1	2	1	0	1	0	1	1	1	1	0	1	0	0
3:2374384-2374523	AT3G07420,	2	-	0	3	0	0	0	6	0	0	0	0	0	0	0	4	0	0
3:10033829-10034400	n/a		-	0	0	1	0	0	0	3	3	0	0	0	1	0	3	2	0
3:17811784-17812452	AT3G48190,	2	+	1	2	0	1	0	0	2	1	0	1	0	1	0	1	3	0
3:22338387-22338767	AT3G60440,	2	+	0	1	0	0	1	1	4	3	0	1	0	1	0	1	0	0
4:2748161-2748299	AT4G05420,	0	+	0	0	0	0	0	0	0	4	0	0	0	0	0	9	0	0
4:11998116-11998501	AT4G22860,	2	+	1	0	2	2	0	0	1	0	0	1	0	0	0	1	2	3
4:18234801-18235749	AT4G39150,	4	-	2	0	0	0	2	1	0	3	0	0	0	1	0	3	0	1
5:1498763-1500083	AT5G05080,	6	-	0	1	0	3	0	0	0	0	0	0	0	0	0	5	2	2
5:3073820-3074015	AT5G09870,	1	+	1	1	2	1	0	0	0	0	0	0	0	0	0	4	3	1
5:4328196-4329108	AT5G13480,	4	-	0	0	3	1	0	0	0	0	1	0	3	0	0	3	0	2
5:5268974-5269421	AT5G16130,	3	+	0	0	5	0	0	2	1	3	0	0	0	0	0	1	1	0
5:6804659-6804979	AT5G20160,	1	-	2	2	0	3	0	0	0	1	1	0	0	2	0	2	0	0
5:7593743-7594683	AT5G22780,	3	-	0	0	0	0	0	0	2	0	0	1	0	2	0	1	6	1
5:13746730-13747477	AT5G35560,	3	-	0	1	1	0	0	4	2	2	0	0	1	0	0	2	0	0
5:19097680-19098305	AT5G47040,	3	-	0	0	2	3	0	0	0	2	0	0	0	1	0	1	1	3
5:21994369-21995043	AT5G54200,	4	-	0	1	1	0	2	1	0	2	0	4	0	0	0	1	0	1
5:25354166-25354416	AT5G63220,	2	-	1	1	0	0	0	0	0	2	2	0	3	1	0	1	1	1
1:2180577-2181011	AT1G07110,	3	-	0	2	2	1	0	0	0	0	0	2	0	1	0	0	2	3
2:1719200-1719380	AT2G04880,	1	+	0	1	1	0	0	1	4	4	0	0	0	0	0	0	2	0
2:14437870-14438549	AT2G34190,	4	+	1	1	3	3	1	3	0	0	0	0	0	0	0	0	1	0
3:1016635-1016930	AT3G03940,	2	-	2	0	0	2	0	0	2	1	0	2	2	1	0	0	1	0
3:3171847-3172253	AT3G10260,	2	-	3	0	1	0	0	1	2	2	0	0	0	0	0	0	4	0
3:9114469-9115080	AT3G25013,	4	+	1	2	0	0	2	0	1	2	0	0	0	3	0	0	2	0
3:9492040-9492403	AT3G25920,	1	-	0	1	2	2	0	2	0	1	0	1	0	2	0	0	1	1
3:16310126-16311179	n/a		+	0	0	5	0	0	4	0	2	0	0	0	0	0	0	1	1
4:1070657-1070886	AT4G02430,	1	+	0	0	0	1	2	0	0	1	0	0	3	0	0	0	4	2
4:1286618-1286942	AT4G02900,	1	+	0	1	0	1	0	3	1	0	0	1	0	1	0	0	4	1
4:15272489-15272694	AT4G31490,	1	+	1	2	0	2	0	0	2	2	0	0	0	0	0	0	2	2
4:15902275-15902431	AT4G32940,	1	-	0	0	0	0	0	1	1	7	0	0	1	2	0	0	1	0
5:6699296-6699579	AT5G19820,	2	-	0	2	1	0	1	1	1	4	0	0	0	1	0	0	1	1
5:20143750-20144864	AT5G49630,	3	-	0	0	3	2	1	0	0	0	0	1	1	2	0	0	1	2
5:24912282-24912446	AT5G62000,	1	+	0	1	0	2	1	0	0	2	0	0	1	2	0	0	2	2
5:25384879-25385077	AT5G63370,	1	-	0	0	0	0	0	1	4	3	0	1	2	0	0	0	2	0
5:25613873-25614432	AT5G63990,	3	+	0	0	0	1	3	2	3	1	0	0	0	0	0	0	1	2
1:2636648-2637252	AT1G08360,	2	+	0	0	0	4	0	2	1	1	2	0	1	1	0	0	0	1
1:3516550-3516771	AT1G10640,	1	-	0	0	0	0	0	0	0	0	0	0	0	0	0	0	0	13
2:12559724-12559906	AT2G29210,	2	+	1	0	0	2	1	2	4	0	0	1	0	1	0	0	0	1
2:16599515-16600316	AT2G39800,	5	-	0	0	1	0	0	0	0	2	0	1	7	1	0	0	0	1
2:16600061-16600316	AT2G39800,	2	-	2	2	0	0	0	0	0	0	0	1	4	2	0	0	0	2
3:6467923-6468779	n/a		-	0	0	1	0	3	2	4	2	0	0	0	0	0	0	0	1
3:18369338-18370188	n/a		+	0	2	1	0	0	5	1	0	0	0	0	0	0	0	0	4
4:15961947-15963085	AT4G33080,	4	+	0	1	0	0	2	1	5	1	1	1	0	0	0	0	0	1
4:18216397-18216634	AT4G39090,	0	-	0	0	2	0	0	0	5	2	0	0	0	3	0	0	0	1
2:15055309-15055622	AT2G35840,	2	+	3	0	0	0	0	0	0	1	0	1	3	5	0	0	0	0
4:6921162-6921966	AT4G11380,	3	+	1	2	0	4	0	2	0	2	0	0	0	2	0	0	0	0
4:1003629-1003983	AT4G02290,	2	-	0	1	0	0	2	3	3	4	0	0	0	0	0	0	0	0
2:17736949-17737537	AT2G42600,	3	-	0	0	0	0	0	0	1	5	1	2	2	2	0	0	0	0
2:13162764-13162949	AT2G30930,	1	+	0	0	4	0	0	0	3	3	0	2	1	0	0	0	0	0
2:19621223-19621706	AT2G47940,	4	-	1	1	0	2	0	1	2	1	0	2	3	0	0	0	0	0
3:20337657-20338005	AT3G54880,	2	-	2	0	1	1	0	4	2	0	0	0	1	2	0	0	0	0
1:12381927-12384513	n/a		-	0	1	0	0	2	8	0	2	0	0	0	0	0	0	0	0
3:2840946-2841896	AT3G09260,	5	-	0	0	0	2	1	3	1	6	0	0	0	0	0	0	0	0
5:26389631-26390136	AT5G65970,	3	-	0	0	0	1	3	0	7	2	0	0	0	0	0	0	0	0
3:2841988-2842429	AT3G09260,	2	-	0	0	0	0	0	4	1	8	0	0	0	0	0	0	0	0
4:15076571-15077410	AT4G30975,	3	+	0	0	0	1	0	5	3	4	0	0	0	0	0	0	0	0
5:10091297-10091517	AT5G28080,	1	-	0	0	0	0	0	7	3	3	0	0	0	0	0	0	0	0
1:454415-455040	AT1G02300,	3	+	0	0	0	1	3	2	1	1	0	1	0	2	1	0	0	0
1:2638907-2639051	AT1G08370,	1	+	0	2	0	1	0	3	0	0	0	0	0	1	2	0	1	2
1:2902352-2902961	AT1G09020,	3	-	0	0	3	0	0	1	1	1	0	0	0	2	3	0	0	1
1:8749471-8750113	AT1G24706,	2	+	0	0	0	0	2	0	1	4	0	0	0	1	1	1	2	0
1:16797519-16798293	AT1G44170,	4	-	0	0	0	0	2	2	0	4	0	0	0	0	1	1	2	0
1:18472715-18473274	AT1G49890,	3	+	0	0	1	2	0	0	0	6	0	0	0	2	1	0	0	0
1:18795623-18795823	AT1G50730,	1	+	0	0	0	0	0	0	4	2	0	1	2	0	1	0	2	0
1:19410985-19411547	AT1G52150,	3	-	2	1	3	2	0	0	0	3	0	0	0	0	1	0	0	0
1:24547704-24547884	AT1G65950,	1	-	0	0	1	2	0	3	0	2	0	1	0	1	1	0	0	1
2:7556754-7556910	AT2G17390,	1	+	0	1	1	1	1	1	0	0	0	0	0	1	2	0	3	1
2:8615162-8615668	AT2G19940,	3	+	1	0	1	1	0	1	0	2	0	0	0	1	1	1	1	2
2:18611336-18611638	AT2G45140,	2	+	0	0	0	0	0	1	1	2	0	0	2	1	1	2	0	2
2:18668012-18668571	AT2G45270,	3	+	0	2	2	0	2	0	1	0	0	2	0	1	2	0	0	0
2:18827655-18827866	AT2G45700,	1	-	0	3	0	1	2	1	0	1	0	0	0	1	1	0	0	2
3:542656-542962	AT3G02560,	1	+	0	1	0	1	0	0	2	1	0	0	0	1	4	1	1	0
3:614935-615174	AT3G02830,	1	+	1	1	0	5	0	0	0	0	0	0	1	0	1	2	1	0
3:1118806-1119617	AT3G04240,	3	-	1	0	0	0	0	0	2	3	0	1	2	0	1	0	1	1
3:7187128-7187446	AT3G20570,	2	+	0	2	0	0	4	2	2	0	0	0	0	0	2	0	0	0
3:9818728-9818895	AT3G26720,	1	+	0	1	1	0	0	0	5	0	0	1	1	0	1	0	1	1
3:17763948-17765278	AT3G48110,	7	+	0	2	1	0	0	1	0	1	0	0	1	3	1	0	0	2
3:18485718-18486334	AT3G49840,	3	+	1	0	3	1	2	2	0	0	0	0	0	1	1	0	1	0
3:19044969-19045323	AT3G51310,	2	-	0	0	0	0	0	0	3	2	1	0	1	1	2	2	0	0
3:20319374-20320490	AT3G54840,	5	+	0	1	2	0	2	0	0	0	0	0	0	0	1	0	5	1
3:20596324-20597034	AT3G55530,	4	-	1	0	2	0	0	2	0	1	0	1	0	0	2	0	0	3
4:12363694-12364007	AT4G23730,	2	+	1	0	0	1	2	0	2	2	0	0	1	1	1	0	0	1
4:15717593-15717762	AT4G32570,	1	-	0	2	0	2	1	2	0	0	0	1	1	0	1	0	1	1
5:6051815-6052290	AT5G18280,	2	-	1	0	0	2	0	0	2	4	1	0	0	0	2	0	0	0
5:7169275-7169676	AT5G21100,	1	+	0	1	0	2	0	0	0	0	1	1	2	0	1	0	4	0
5:8904477-8904807	AT5G25580,	2	+	0	0	0	0	0	6	0	0	0	0	0	1	1	3	0	1
5:13463619-13464016	AT5G35200,	3	-	0	1	0	1	1	0	1	4	0	0	1	0	3	0	0	0
5:19344440-19344687	AT5G47760,	2	-	2	0	0	1	1	0	1	2	0	0	0	0	2	0	3	0
5:22628372-22628549	n/a		+	0	0	0	0	0	0	0	0	0	0	0	4	3	0	3	2
5:23112019-23112365	AT5G57110,	2	-	0	0	0	4	0	1	2	3	0	0	0	1	1	0	0	0
Mt:189253-189548	n/a		+	0	0	0	0	0	0	3	3	0	0	1	1	2	0	0	2
1:2625603-2626272	AT1G08320,	1	-	0	0	0	0	0	1	0	2	0	0	0	0	0	2	5	2
1:6144533-6144727	AT1G17840,	1	+	0	2	1	0	0	0	0	0	0	0	0	1	0	3	1	4
1:8594326-8594697	AT1G24260,	3	-	0	0	0	0	0	0	0	0	0	0	0	0	0	3	7	2
1:9855735-9855967	AT1G28210,	2	+	0	1	0	0	0	3	0	0	0	0	0	0	0	2	5	1
1:11398615-11398910	AT1G31800,	2	+	2	0	0	2	0	1	0	0	1	3	0	0	0	1	1	1
1:17482513-17483193	AT1G47570,	3	+	0	0	2	1	2	1	1	0	0	1	0	0	0	3	1	0
1:19520929-19521714	AT1G52410,	5	+	0	0	0	0	0	2	2	1	0	0	0	0	0	1	3	3
1:26051215-26051565	AT1G69295,	2	-	0	0	2	0	0	3	2	1	0	0	1	1	0	1	1	0
1:27003935-27004543	AT1G71810,	3	-	0	2	0	0	0	0	0	0	0	0	2	0	0	2	3	3
2:7738393-7738877	AT2G17790,	3	+	0	2	0	0	2	1	1	3	0	1	0	1	0	1	0	0
2:8457805-8458000	AT2G19520,	1	+	0	0	4	0	2	0	0	3	0	1	0	0	0	1	0	1
2:11134231-11134503	AT2G26140,	1	-	0	0	3	1	0	3	1	0	1	2	0	0	0	1	0	0
2:12096432-12096740	AT2G28320,	2	+	0	1	0	2	0	1	4	0	0	0	0	1	0	1	2	0
2:12250696-12251087	AT2G28590,	1	+	0	0	0	1	0	3	2	1	0	0	0	0	0	3	0	2
2:13420172-13420731	AT2G31510,	3	-	0	1	0	1	0	2	4	0	0	0	0	1	0	2	0	1
2:14974966-14975236	AT2G35630,	2	+	0	2	0	0	3	0	1	0	0	0	3	2	0	1	0	0
2:18316656-18317075	AT2G44350,	3	+	1	1	0	0	1	0	3	2	0	0	0	1	0	1	1	1
2:18435992-18436631	AT2G44710,	4	+	0	0	3	1	1	0	1	0	1	2	1	0	0	1	0	1
3:524265-524409	AT3G02510,	1	-	0	1	1	1	1	2	0	2	0	0	0	0	0	1	0	3
3:1016635-1017068	AT3G03940,	3	-	2	0	1	4	1	0	3	0	0	0	0	0	0	1	0	0
3:4821788-4821940	AT3G14420,	1	+	0	1	0	2	0	0	0	0	1	3	1	3	0	1	0	0
3:4991846-4992041	AT3G14840,	1	+	0	2	0	5	2	0	0	1	0	0	1	0	0	1	0	0
3:8195564-8195817	AT3G23050,	1	+	0	0	3	2	0	0	0	0	0	1	0	0	0	2	2	2
3:19710299-19710487	AT3G53180,	1	+	1	3	1	0	1	1	1	1	0	0	0	0	0	2	0	1
3:20884459-20885076	AT3G56310,	4	+	0	0	0	1	0	0	2	2	0	2	2	2	0	1	0	0
4:8249657-8250276	AT4G14340,	4	-	1	0	0	0	0	2	0	3	1	0	1	0	0	2	2	0
4:9025452-9025713	AT4G15900,	2	+	0	2	2	0	0	0	0	1	0	0	0	1	0	2	1	3
4:10233325-10234309	AT4G18570,	2	+	2	3	2	1	0	0	0	0	0	0	0	0	0	2	2	0
4:13518998-13519472	AT4G26900,	2	+	1	0	0	0	0	3	2	0	0	0	0	0	0	2	0	4
4:13740592-13740958	AT4G27490,	2	+	0	0	4	1	2	0	2	0	0	0	0	0	0	1	2	0
4:14058464-14058617	AT4G28430,	1	+	1	0	0	0	4	3	2	0	0	0	0	0	0	2	0	0
4:14233372-14233597	AT4G28830,	2	+	0	1	0	0	1	1	0	3	0	0	0	0	0	3	0	3
5:3767352-3768192	AT5G11700,	4	-	0	0	1	1	0	1	0	2	0	0	0	2	0	2	3	0
5:4358555-4358756	AT5G13550,	1	-	0	0	1	1	0	1	0	3	0	0	1	0	0	4	1	0
5:6021766-6022181	AT5G18230,	2	-	1	2	0	0	1	1	0	0	0	0	0	0	0	2	3	2
5:9026779-9027380	AT5G25880,	3	+	0	0	0	1	0	0	0	0	0	0	0	0	0	2	5	4
5:10863727-10863877	AT5G28840,	1	+	1	0	2	3	0	0	0	0	0	0	3	1	0	1	0	1
5:15025579-15026752	n/a		+	0	0	0	2	3	0	0	3	0	0	0	0	0	1	0	3
5:18244850-18245861	AT5G45130,	5	+	1	0	1	2	0	0	0	1	0	0	0	1	0	3	2	1
5:21436758-21437105	AT5G52882,	3	-	0	0	2	0	1	3	0	0	0	0	0	0	0	4	0	2
5:23684608-23684786	AT5G58600,	1	-	0	0	0	0	1	0	4	1	0	0	1	0	0	1	2	2
1:2452807-2453856	AT1G07910,	4	+	0	0	0	4	0	1	2	1	0	0	0	1	0	0	2	1
1:4981615-4982237	AT1G14560,	3	+	2	0	0	0	1	0	4	0	0	0	0	2	0	0	2	1
1:5297991-5298178	AT1G05163,	1	+	0	0	0	0	0	0	5	0	0	0	4	0	0	0	3	0
1:5321076-5321276	AT1G15490,	1	-	0	0	0	0	4	0	2	0	0	0	0	4	0	0	2	0
1:7018032-7018441	AT1G20260,	2	+	0	0	3	0	0	1	0	1	0	0	1	2	0	0	2	2
1:12145684-12145942	AT1G33470,	1	+	0	0	0	1	2	5	2	0	0	0	0	1	0	0	1	0
1:18935743-18936205	AT1G51110,	3	+	0	0	3	3	0	0	0	0	0	0	1	0	0	0	4	1
1:28410227-28410869	AT1G75660,	3	+	1	3	1	0	1	2	0	0	0	0	1	1	0	0	2	0
1:28418600-28418883	AT1G75680,	1	-	0	0	0	1	2	1	1	0	0	0	1	1	0	0	3	2
2:11444766-11445517	AT2G26830,	3	+	0	0	0	4	2	0	1	1	0	0	0	0	0	0	1	3
3:853610-854210	AT3G03560,	4	-	0	0	0	1	0	0	0	2	0	0	0	4	0	0	2	3
3:2590711-2590963	AT3G08530,	1	-	0	0	0	3	0	0	2	1	2	0	0	0	0	0	2	2
3:4380313-4381022	AT3G13445,	4	+	0	0	1	1	2	0	2	2	0	0	1	0	0	0	3	0
3:4418819-4419089	AT3G13530,	2	-	0	0	0	0	0	3	1	4	0	0	0	0	0	0	4	0
3:8519820-8520136	AT3G23670,	2	+	0	0	2	1	4	3	0	0	0	0	0	0	0	0	2	0
3:18408998-18409272	AT3G49650,	2	-	0	4	0	1	0	2	0	0	0	0	0	0	0	0	3	2
3:18998139-18998511	AT3G51140,	2	+	0	0	0	0	0	2	1	2	1	0	0	2	0	0	4	0
3:20710509-20710730	AT3G55800,	1	+	1	2	2	0	0	0	0	0	0	3	0	3	0	0	1	0
4:1297788-1298049	AT4G02930,	2	-	0	0	1	0	0	0	0	2	0	0	2	4	0	0	3	0
4:9645581-9645978	AT4G17170,	2	-	0	0	0	1	2	1	0	1	0	0	1	3	0	0	1	2
4:11011205-11011573	AT4G20400,	1	+	0	0	3	0	0	3	1	0	0	0	2	2	0	0	1	0
4:14900547-14900965	AT4G30490,	3	-	0	0	5	1	0	0	1	0	0	0	1	1	0	0	3	0
4:16483541-16483836	AT4G34480,	1	-	0	0	0	0	0	0	3	4	1	1	1	0	0	0	1	1
4:18091806-18092689	AT4G38760,	4	-	0	1	1	1	2	0	3	1	0	0	0	0	0	0	1	2
5:360042-360446	AT5G01920,	1	+	0	2	0	6	0	0	0	0	0	0	0	0	0	0	3	1
5:2692161-2692811	AT5G08370,	4	-	0	1	0	1	0	2	0	4	0	0	0	1	0	0	3	0
5:4510115-4510468	AT5G13980,	2	+	1	0	0	0	1	3	2	1	0	1	0	0	0	0	3	0
5:8341537-8342211	AT5G24430,	4	-	0	0	1	0	0	2	4	1	0	0	0	2	0	0	1	1
5:8960359-8960674	AT5G25755,	1	-	0	0	0	0	0	2	6	1	0	1	0	0	0	0	2	0
5:24611497-24611843	AT5G61170,	2	+	2	0	0	0	2	0	2	2	0	0	0	0	0	0	1	3
5:25749244-25749794	AT5G64400,	3	+	0	0	2	0	0	0	2	1	0	1	2	2	0	0	1	1
5:25774668-25775115	AT5G64460,	2	-	0	0	1	2	0	1	0	3	0	1	0	1	0	0	3	0
1:2838034-2838692	AT1G08840,	2	-	1	1	1	1	0	6	0	0	0	0	0	0	0	0	0	2
1:30090224-30090595	AT1G79990,	2	+	0	2	0	0	0	1	2	3	1	0	0	0	0	0	0	3
2:3526650-3526829	AT2G07690,	1	-	1	4	0	0	0	2	0	3	0	0	0	1	0	0	0	1
3:108914-109107	AT3G01320,	1	+	1	0	2	1	1	0	0	2	0	2	1	1	0	0	0	1
4:6920695-6921123	AT4G11380,	2	+	0	0	0	3	2	0	0	6	0	0	0	0	0	0	0	1
4:10047503-10047638	AT4G18140,	0	-	0	3	2	0	0	1	0	0	0	0	0	2	0	0	0	4
4:15492353-15492715	AT4G32030,	2	+	2	3	1	1	1	1	0	0	1	0	0	0	0	0	0	2
4:16045828-16046106	AT4G33270,	1	-	1	1	0	3	0	3	1	0	0	0	0	0	0	0	0	3
5:8476556-8476739	AT5G24740,	1	-	0	0	3	0	0	2	0	0	2	0	2	1	0	0	0	2
5:22486930-22487332	AT5G55510,	3	-	0	0	0	2	0	2	0	2	0	1	4	0	0	0	0	1
1:8606170-8606742	AT1G24267,	4	-	0	0	0	0	2	2	4	0	0	2	0	2	0	0	0	0
5:25626130-25626279	AT5G64030,	1	+	0	0	0	1	3	0	7	0	0	0	1	0	0	0	0	0
4:6632014-6632412	AT4G10770,	1	-	1	0	0	1	0	3	0	2	1	3	1	0	0	0	0	0
5:8962564-8963402	n/a		-	0	0	1	3	0	4	0	3	0	0	0	1	0	0	0	0
1:27671799-27672132	AT1G73600,	2	+	0	1	0	0	0	3	0	0	3	5	0	0	0	0	0	0
1:1431807-1432518	AT1G05010,	2	-	0	0	0	6	0	0	0	1	0	1	3	1	0	0	0	0
1:13207357-13207524	AT1G35670,	1	+	1	0	2	2	0	0	1	2	0	2	1	1	0	0	0	0
1:7143107-7144736	AT1G20620,	1	+	0	0	0	0	0	0	1	2	0	0	6	3	0	0	0	0
1:21208153-21208725	AT1G56600,	2	+	0	0	0	0	0	0	5	5	0	0	2	0	0	0	0	0
1:21208601-21209274	AT1G56600,	2	-	0	0	0	0	0	0	5	2	0	0	5	0	0	0	0	0
2:14462607-14462978	AT2G34250,	1	+	0	1	1	1	1	0	2	3	0	0	3	0	0	0	0	0
5:13873892-13874091	AT5G35700,	1	-	0	0	0	0	0	0	0	0	0	0	12	0	0	0	0	0
1:26056117-26056712	AT1G69310,	2	-	0	0	0	0	0	0	6	2	0	0	0	4	0	0	0	0
3:4784777-4785105	AT3G14350,	1	-	0	0	0	0	0	2	4	5	0	0	0	1	0	0	0	0
3:22313771-22314021	AT3G60360,	2	-	1	1	2	0	3	2	3	0	0	0	0	0	0	0	0	0
5:1391772-1391925	AT5G04810,	1	+	2	3	2	2	1	2	0	0	0	0	0	0	0	0	0	0
5:3742263-3742610	AT5G11640,	3	+	0	3	0	2	3	1	1	2	0	0	0	0	0	0	0	0
5:25459530-25459861	AT5G63595,	2	-	0	0	0	0	2	5	3	2	0	0	0	0	0	0	0	0
4:15189205-15190309	AT4G31300,	4	+	1	0	0	0	0	2	3	6	0	0	0	0	0	0	0	0
Mt:11615-12086	n/a		-	1	0	0	0	0	2	2	7	0	0	0	0	0	0	0	0
Pt:557-703	ATCG00020,	1	+	0	12	0	0	0	0	0	0	0	0	0	0	0	0	0	0
1:576994-577906	AT1G02670,	2	+	0	0	0	0	2	0	0	0	0	0	0	0	2	5	2	0
1:1054663-1054806	AT1G04080,	1	+	0	1	0	0	0	0	0	1	0	2	2	0	2	0	1	2
1:1759618-1760412	AT1G05830,	3	+	0	0	1	2	1	2	2	2	0	0	0	0	1	0	0	0
1:3373444-3373745	AT1G10290,	2	+	0	0	0	1	0	0	0	3	0	0	0	1	1	0	2	3
1:10097934-10100152	AT1G28715,	4	-	0	0	1	0	0	2	1	3	0	1	0	1	1	0	1	0
1:12598848-12600110	AT1G34460,	5	+	0	0	2	0	0	5	0	0	0	0	0	0	2	1	0	1
1:28958602-28959371	AT1G77080,	3	+	0	0	0	0	0	0	3	2	0	0	0	0	1	1	0	4
1:30088127-30089189	AT1G79990,	4	+	0	0	3	2	1	0	2	0	0	0	0	0	1	1	1	0
2:18273650-18273948	AT2G44190,	2	+	0	1	0	1	0	0	0	0	0	0	0	0	1	0	6	2
3:142651-142840	AT3G01370,	1	+	1	3	0	2	0	0	0	0	0	0	2	0	1	1	0	1
3:5726649-5727100	AT3G16810,	3	-	0	1	0	3	0	0	2	0	0	0	1	0	1	0	3	0
3:18615121-18615424	AT3G50210,	2	-	0	1	2	0	0	2	1	0	0	0	0	0	1	2	2	0
3:19847546-19847726	AT3G53540,	1	-	0	1	0	1	0	1	3	4	0	0	0	0	1	0	0	0
4:37274-37837	AT4G00100,	3	+	0	1	3	0	0	0	5	0	0	0	0	0	1	0	0	1
4:1109663-1110365	AT4G02510,	2	+	2	2	0	1	0	0	1	0	0	0	0	2	1	0	2	0
4:7807273-7807443	AT4G13430,	1	-	0	1	2	1	0	2	1	1	0	0	0	0	1	0	2	0
4:8983153-8983668	AT4G15790,	3	+	0	0	4	0	0	0	1	0	0	0	0	0	1	1	4	0
4:15041365-15042094	AT4G30900,	3	+	0	1	0	0	1	0	0	4	0	0	2	0	1	0	2	0
4:18261511-18261752	AT4G39210,	2	+	0	2	0	0	0	0	0	2	0	0	1	0	2	0	0	4
5:7592900-7593192	AT5G22780,	2	-	0	1	0	0	0	2	0	2	0	0	0	4	1	0	1	0
5:9072847-9073074	AT5G25980,	2	-	0	0	0	0	0	0	0	0	0	0	0	0	8	0	3	0
5:21070318-21070530	AT5G51830,	1	+	0	0	1	0	0	0	0	1	1	0	1	1	2	1	0	3
5:23072415-23073129	AT5G57015,	5	+	0	0	3	0	0	0	2	1	1	0	0	0	1	1	1	1
5:23904700-23905323	AT5G59250,	4	+	0	2	0	1	0	0	3	0	0	1	0	1	2	1	0	0
5:24359425-24359654	AT5G60600,	1	+	1	2	0	2	0	0	0	0	0	0	0	2	1	0	0	3
5:24629916-24630063	AT5G61240,	1	+	0	0	0	0	1	1	1	2	0	2	2	0	1	1	0	0
5:24684409-24684818	AT5G61410,	3	-	0	0	1	2	0	0	0	1	0	2	2	1	2	0	0	0
5:25698531-25698743	AT5G64250,	1	-	0	0	0	0	0	3	3	3	0	0	0	0	1	0	0	1
1:1808736-1808936	AT1G05960,	1	-	0	0	0	2	2	2	0	2	0	2	0	0	0	1	0	0
1:2827680-2828201	AT1G08830,	3	+	0	0	0	0	1	0	0	1	0	0	3	4	0	2	0	0
1:2902352-2902711	AT1G09020,	2	-	0	0	0	0	1	2	0	3	0	0	3	1	0	1	0	0
1:3056552-3057047	AT1G09470,	2	-	0	0	0	0	0	3	2	4	0	0	0	0	0	2	0	0
1:3346790-3347750	AT1G10200,	4	-	0	0	0	0	2	3	0	2	0	0	0	0	0	3	0	1
1:10833748-10835034	AT1G30580,	5	-	0	3	0	0	1	2	1	0	0	0	0	0	0	1	1	2
1:19410583-19410911	AT1G52150,	1	-	0	0	2	1	0	0	0	2	3	0	1	1	0	1	0	0
1:20185195-20186343	AT1G54080,	7	-	0	0	4	0	0	2	1	0	0	0	0	0	0	1	2	1
1:29623929-29624300	AT1G78790,	3	-	0	1	0	1	2	0	0	1	0	1	1	1	0	1	2	0
2:10329058-10329251	AT2G24270,	1	-	0	1	0	0	0	0	0	0	0	2	0	3	0	1	0	4
2:13881555-13881908	AT2G32730,	2	+	0	1	1	1	0	0	1	3	0	0	1	1	0	1	1	0
2:17699176-17699906	AT2G42500,	3	-	0	0	3	1	4	1	0	0	0	0	0	0	0	1	1	0
2:19301035-19301336	AT2G46980,	2	-	0	0	0	0	1	0	0	3	0	0	2	0	0	2	0	3
2:19393804-19393980	AT2G47240,	1	+	0	1	0	0	0	0	0	0	0	0	0	0	0	4	3	3
3:2109947-2111081	AT3G06670,	4	-	2	0	0	0	0	0	0	3	0	0	3	0	0	2	1	0
3:2126763-2126927	AT3G06740,	1	+	1	0	0	0	1	2	2	2	0	0	0	0	0	1	0	2
3:2664550-2664784	AT3G08770,	1	+	0	0	0	0	0	0	0	0	0	0	0	0	0	1	7	3
3:4470352-4471107	AT3G13670,	4	+	0	0	0	3	0	1	0	3	0	0	0	1	0	3	0	0
3:7064512-7064726	AT3G20260,	1	-	0	0	0	0	2	3	0	4	0	0	0	0	0	1	0	1
3:7175974-7176765	AT3G20550,	4	-	0	0	3	2	1	0	0	0	0	0	1	0	0	1	2	1
3:17168045-17169296	n/a		-	0	0	0	0	1	5	0	0	0	0	0	0	0	2	2	1
3:17765537-17766319	AT3G48110,	3	+	2	2	1	0	0	1	0	2	0	0	0	2	0	1	0	0
3:22455026-22455308	AT3G60750,	1	+	0	1	1	0	0	0	3	2	0	1	0	1	0	2	0	0
3:22727471-22729216	AT3G61420,	8	-	0	2	0	1	1	1	0	1	0	3	0	1	0	1	0	0
4:9843500-9843750	AT4G17680,	1	-	0	1	2	0	0	0	0	0	0	0	0	0	0	3	3	2
4:10974943-10975614	AT4G20320,	1	+	0	3	0	0	0	0	0	2	0	0	1	2	0	1	2	0
4:11718029-11719164	AT4G22120,	4	-	2	2	0	0	1	2	0	0	0	0	0	0	0	2	0	2
4:14855864-14856100	AT4G30360,	1	-	1	0	0	0	0	2	0	1	0	1	2	1	0	1	0	2
4:15187077-15187776	AT4G31290,	5	+	0	2	4	1	0	0	0	2	0	0	0	0	0	2	0	0
4:18210397-18210891	AT4G39080,	2	+	0	1	0	2	0	0	0	2	1	0	3	0	0	1	0	1
5:252603-252968	AT5G01670,	2	+	0	0	1	0	0	2	1	2	0	1	1	2	0	1	0	0
5:2163149-2164004	AT5G06970,	3	-	1	2	0	1	3	1	1	1	0	0	0	0	0	1	0	0
5:2764450-2765208	AT5G08540,	4	+	0	0	2	0	0	0	1	2	0	0	0	0	0	1	4	1
5:17659431-17659746	AT5G43900,	2	-	0	0	2	1	0	3	0	1	1	0	0	0	0	1	2	0
5:18708851-18709140	AT5G46150,	1	-	0	0	0	0	1	0	0	1	0	0	1	2	0	1	4	1
1:2095069-2095572	AT1G06820,	3	-	0	0	4	0	0	2	0	0	0	0	2	0	0	0	3	0
1:2638907-2639575	AT1G08370,	3	+	0	0	0	0	1	5	0	0	0	0	0	0	0	0	5	0
1:2764236-2764689	AT1G08680,	3	+	0	0	0	1	1	2	1	2	0	0	0	0	0	0	1	3
1:4780166-4780360	AT1G13970,	1	-	0	1	0	0	0	1	5	3	0	0	0	0	0	0	1	0
1:9663959-9664620	AT1G27752,	3	+	0	0	0	2	0	2	3	2	0	0	0	0	0	0	2	0
1:16128153-16128572	AT1G42970,	2	+	1	0	0	1	0	0	0	2	0	0	0	3	0	0	2	2
1:22586467-22586973	AT1G61250,	3	+	0	0	2	0	3	0	2	1	0	0	0	0	0	0	3	0
1:25102048-25102439	AT1G67140,	2	-	0	1	0	2	0	1	0	0	0	1	0	0	0	0	4	2
1:26021835-26022532	AT1G69220,	3	-	0	0	0	1	0	2	2	2	0	0	0	1	0	0	2	1
1:29555351-29555740	AT1G78580,	2	-	0	1	1	0	2	0	1	5	0	0	0	0	0	0	1	0
1:30024717-30026033	AT1G79820,	5	-	0	0	0	0	1	1	2	2	0	0	0	0	0	0	4	1
2:2925886-2926524	AT2G07050,	3	+	1	0	0	0	1	2	2	0	0	1	0	0	0	0	2	2
2:13145030-13145582	AT2G30880,	3	-	0	0	1	0	0	1	2	0	1	0	0	1	0	0	2	3
2:19450267-19451196	AT2G47410,	4	+	0	0	1	0	0	0	2	3	0	0	0	0	0	0	5	0
3:195179-195337	AT3G01500,	1	-	0	0	0	2	0	0	0	0	0	1	2	4	0	0	2	0
3:6626924-6628044	AT3G19170,	3	-	0	0	1	3	0	1	0	1	0	0	2	1	0	0	2	0
3:22890740-22890927	AT3G61830,	1	+	2	0	1	2	0	3	0	0	0	0	1	0	0	0	1	1
4:942340-942953	AT4G02120,	4	+	0	0	0	4	0	2	0	1	0	0	0	0	0	0	4	0
4:2432645-2433091	AT4G04780,	2	+	0	0	0	1	3	0	2	1	0	0	0	1	0	0	1	2
4:8630711-8631149	AT4G15110,	3	-	2	0	0	1	0	0	1	4	0	1	0	0	0	0	2	0
4:9024266-9024749	AT4G15900,	3	+	0	0	3	0	0	1	1	1	0	0	0	0	0	0	5	0
4:13077270-13077713	AT4G25640,	2	-	0	0	1	0	0	0	0	0	0	4	3	1	0	0	2	0
4:14900122-14900464	AT4G30490,	3	-	0	0	0	0	0	0	3	1	0	0	2	2	0	0	3	0
4:15924930-15926040	AT4G33000,	5	+	0	0	0	1	0	0	0	0	1	0	1	0	0	0	5	3
5:2711781-2712146	AT5G08415,	2	-	0	0	0	0	0	2	1	2	0	0	0	0	0	0	6	0
5:7165827-7166649	AT5G21090,	4	+	0	2	2	1	0	2	0	1	0	0	0	0	0	0	3	0
5:13109814-13110526	AT5G34850,	2	-	1	2	1	1	2	0	0	0	0	0	0	0	0	0	2	2
5:17745586-17746452	AT5G44090,	3	-	0	0	0	0	2	3	0	0	0	1	0	1	0	0	4	0
5:18616530-18616822	AT5G45900,	1	+	1	0	0	0	1	1	0	3	0	0	2	1	0	0	2	0
5:20690946-20691370	AT5G50850,	2	+	0	0	0	0	0	1	1	0	0	1	3	1	0	0	4	0
5:25971377-25971592	AT5G65010,	1	+	0	0	0	0	1	1	0	0	0	0	5	2	0	0	1	1
1:3652949-3653341	AT1G10930,	2	-	2	0	2	1	0	0	0	4	0	0	0	0	0	0	0	2
1:17131080-17131660	AT1G45207,	2	-	1	0	0	0	3	0	0	3	0	0	0	3	0	0	0	1
1:24244376-24244536	AT1G65270,	1	+	0	1	0	1	0	0	1	1	0	0	2	3	0	0	0	2
1:26868339-26869044	AT1G71270,	3	+	0	0	1	2	2	1	2	0	0	0	0	2	0	0	0	1
2:11148896-11149304	AT2G26190,	3	-	1	0	0	1	3	0	0	1	0	1	2	0	0	0	0	2
2:15055309-15055495	AT2G35840,	1	+	0	0	0	0	1	0	0	3	0	0	6	0	0	0	0	1
2:15445505-15445703	AT2G36830,	1	-	1	0	3	0	0	0	0	3	0	0	0	2	0	0	0	2
2:16599876-16600316	AT2G39800,	3	-	1	0	0	0	0	0	1	1	0	0	4	2	0	0	0	2
3:7111024-7111284	AT3G20390,	2	-	2	0	1	0	4	1	0	0	0	2	0	0	0	0	0	1
3:22152704-22153022	AT3G59970,	2	+	0	0	0	0	0	0	1	2	0	2	2	2	0	0	0	2
4:12301460-12301704	AT4G23570,	2	+	0	0	0	0	4	0	0	2	0	1	0	3	0	0	0	1
5:4226801-4227201	AT5G13240,	3	-	0	1	2	1	1	1	0	2	0	0	0	2	0	0	0	1
5:5942034-5942363	AT5G17930,	2	-	0	1	0	0	0	2	1	3	0	1	0	1	0	0	0	2
5:7665949-7666307	AT5G22920,	3	+	1	0	2	1	1	1	1	0	1	0	1	1	0	0	0	1
5:22051837-22052617	AT5G54290,	4	+	0	2	2	1	2	0	0	1	0	0	0	1	0	0	0	2
1:30263844-30264424	AT1G80490,	4	-	0	1	2	3	1	0	0	2	1	0	1	0	0	0	0	0
2:3526472-3527050	AT2G07690,	3	-	1	0	1	2	1	5	0	0	0	1	0	0	0	0	0	0
1:17433291-17434335	AT1G47500,	3	+	0	0	1	3	0	3	1	1	0	0	2	0	0	0	0	0
1:28972894-28973577	AT1G77110,	3	+	0	1	2	1	2	0	1	4	0	0	0	0	0	0	0	0
4:13604939-13605569	AT4G27130,	3	-	0	3	0	2	3	1	0	1	0	0	0	1	0	0	0	0
5:14119521-14119993	AT5G35970,	2	-	0	0	5	2	1	0	0	0	1	1	0	1	0	0	0	0
1:1190465-1190905	AT1G04410,	2	-	0	0	1	0	2	0	1	3	0	1	2	1	0	0	0	0
3:19338841-19339407	AT3G52140,	3	+	0	0	0	0	1	0	0	5	0	2	1	2	0	0	0	0
5:14752237-14752500	AT5G37260,	2	-	0	1	1	0	0	0	3	5	0	1	0	0	0	0	0	0
5:16676492-16676886	AT5G41700,	2	+	0	0	0	1	0	1	0	6	0	1	1	1	0	0	0	0
5:23969937-23970186	AT5G59430,	1	-	0	0	3	2	0	0	2	2	0	1	1	0	0	0	0	0
5:24297668-24297978	AT5G60410,	2	+	0	0	0	0	0	1	1	3	0	1	4	1	0	0	0	0
1:30218493-30218945	AT1G80380,	3	+	0	0	3	0	0	6	1	0	0	0	1	0	0	0	0	0
2:8857199-8857575	AT2G20570,	2	-	0	0	3	2	0	0	0	0	0	0	3	3	0	0	0	0
4:5758982-5759303	AT4G08980,	1	+	0	0	0	0	0	1	6	3	0	0	1	0	0	0	0	0
5:13751056-13751542	AT5G35570,	2	-	0	0	2	2	0	0	4	2	0	0	0	1	0	0	0	0
3:2843586-2843734	AT3G09260,	1	+	0	0	0	0	8	2	1	0	0	0	0	0	0	0	0	0
2:466333-466511	AT2G01990,	1	-	0	2	0	1	0	2	0	6	0	0	0	0	0	0	0	0
4:1318913-1473003	n/a		+	0	0	0	0	0	11	0	0	0	0	0	0	0	0	0	0
5:23307975-23308256	AT5G57560,	1	-	0	0	0	0	0	0	0	11	0	0	0	0	0	0	0	0
1:1014951-1015518	AT1G03960,	3	+	0	1	0	0	2	0	0	0	0	0	0	0	1	0	6	0
1:2053786-2054596	AT1G06700,	3	-	1	1	0	0	1	0	1	2	0	0	0	2	1	1	0	0
1:2259003-2259152	AT1G07350,	1	-	0	0	0	0	0	3	2	1	0	0	0	1	1	0	2	0
1:8337218-8337579	AT1G23490,	2	+	0	0	1	2	3	0	0	2	0	0	1	0	1	0	0	0
1:13538090-13538468	AT1G36160,	2	+	0	0	1	1	0	2	1	0	0	0	0	0	2	0	1	2
1:17903108-17904292	AT1G48430,	7	-	0	0	0	0	0	0	0	0	0	1	2	0	1	1	2	3
1:20726734-20727112	AT1G55520,	3	-	0	1	2	0	1	1	0	1	0	0	0	0	1	1	0	2
1:23619006-23619370	AT1G63690,	2	+	0	2	0	2	1	0	0	0	0	1	0	0	1	1	2	0
1:29623929-29624528	AT1G78790,	4	-	0	1	1	2	0	1	0	2	0	0	0	1	1	0	1	0
1:29992089-29993404	AT1G79700,	4	-	0	0	2	0	0	0	0	1	0	0	0	2	2	2	0	1
1:30215066-30215677	AT1G80370,	3	+	0	1	3	0	0	1	0	0	0	0	0	0	2	0	2	1
1:30263844-30264284	AT1G80490,	3	-	1	1	3	0	0	0	0	1	0	0	0	0	2	0	1	1
2:2181460-2182386	AT2G05760,	5	+	0	0	2	1	3	0	0	0	0	0	0	0	1	1	0	2
2:8976823-8977181	AT2G20850,	1	-	0	1	0	0	2	2	0	0	0	0	0	0	1	0	3	1
2:11110800-11111400	AT2G26080,	3	-	0	1	0	3	0	0	0	1	0	0	0	1	2	0	1	1
2:11915737-11915950	AT2G27980,	1	-	0	0	0	1	0	2	0	6	0	0	0	0	1	0	0	0
2:14667693-14667839	AT2G34770,	1	+	1	0	0	2	0	0	0	0	1	2	3	0	1	0	0	0
2:18101432-18101584	AT2G43650,	1	+	0	0	0	0	0	0	0	0	0	0	0	0	3	2	3	2
3:63762-64182	AT3G01180,	3	-	1	0	1	0	0	2	0	2	0	0	0	1	1	1	1	0
3:1528910-1530256	AT3G05350,	5	-	0	1	0	2	0	0	0	3	1	0	0	0	1	0	1	1
3:2276794-2277215	AT3G07160,	2	-	0	0	2	0	0	3	1	3	0	0	0	0	1	0	0	0
3:6184960-6185202	AT3G18060,	0	+	0	0	0	0	0	0	0	1	0	0	0	7	2	0	0	0
3:7003071-7003632	AT3G20060,	3	-	1	0	0	0	0	2	2	0	0	0	0	0	4	0	1	0
3:7348882-7349057	AT3G20970,	1	+	0	2	3	1	0	0	0	0	0	0	0	0	2	0	2	0
3:8637718-8637934	AT3G23910,	1	-	0	0	0	0	1	0	1	4	0	0	0	0	1	2	0	1
3:8733642-8734142	AT3G24170,	3	-	0	1	0	1	0	1	5	0	0	0	0	0	2	0	0	0
3:10875845-10876950	AT3G28860,	2	-	0	1	1	1	0	1	1	2	0	0	0	0	1	0	1	1
3:15819512-15820170	AT3G44050,	4	+	0	0	0	0	1	2	1	4	0	0	0	0	1	1	0	0
3:16008505-16008669	AT3G44330,	1	+	1	0	0	1	0	0	1	0	0	0	4	0	1	1	1	0
3:22136662-22136959	AT3G59920,	2	+	0	0	0	1	0	0	0	0	0	0	1	0	2	2	4	0
4:7109878-7110409	AT4G11820,	4	-	0	0	0	0	0	1	0	0	0	0	0	1	1	1	3	3
4:8169982-8170346	AT4G14160,	2	+	0	0	1	1	0	2	2	1	0	0	0	0	2	0	1	0
4:12756303-12756566	AT4G24740,	2	-	0	1	0	0	2	3	0	1	0	0	0	0	1	2	0	0
4:12873875-12874218	AT4G25070,	3	+	0	2	1	0	2	4	0	0	0	0	0	0	1	0	0	0
4:13188199-13188857	AT4G25970,	4	+	2	0	0	0	0	0	0	0	0	0	1	0	1	1	5	0
4:16041470-16046106	n/a		-	0	4	1	1	1	0	0	0	0	0	0	0	1	0	0	2
5:4537285-4537703	AT5G14060,	2	+	0	1	0	4	0	1	0	0	0	2	0	1	1	0	0	0
5:5313417-5315066	AT5G16260,	7	+	1	0	1	0	0	1	1	1	0	0	0	1	1	2	0	1
5:6218656-6219335	AT5G18650,	5	+	0	1	0	2	0	0	0	0	0	0	0	0	2	1	0	4
5:6569544-6569774	AT5G19473,	1	+	0	1	0	0	0	0	0	0	0	0	1	0	1	1	6	0
5:10542154-10543049	AT5G28540,	3	-	0	0	0	3	0	1	0	2	0	0	0	2	1	0	0	1
5:15517283-15521015	n/a		+	1	0	0	0	0	4	0	1	0	0	0	0	1	3	0	0
5:22235297-22235527	AT5G54730,	1	-	0	1	0	0	0	1	1	2	0	1	0	0	2	0	0	2
5:23581297-23581811	AT5G58330,	2	-	0	0	2	2	0	0	0	0	0	0	1	1	2	0	0	2
5:24711388-24712003	AT5G61450,	4	-	0	0	1	0	0	1	0	3	0	0	0	0	1	2	2	0
5:25353567-25354416	AT5G63220,	5	-	2	1	1	0	0	1	0	1	0	0	0	2	2	0	0	0
1:2707424-2708283	AT1G08550,	3	+	0	3	1	3	0	0	0	0	0	0	1	0	0	1	0	1
1:2995147-2995668	AT1G09270,	3	+	0	1	0	0	0	2	2	1	0	0	1	0	0	2	1	0
1:4799002-4799228	AT1G14000,	2	+	0	0	2	0	1	3	0	0	0	1	0	0	0	1	0	2
1:4876361-4876767	AT1G14270,	1	-	0	3	1	0	0	0	0	0	0	4	0	1	0	1	0	0
1:25200425-25201139	AT1G67310,	3	-	0	0	0	0	1	2	2	0	0	1	0	1	0	1	2	0
2:7687705-7687968	AT2G17700,	2	-	1	2	1	0	0	1	1	2	0	0	0	0	0	2	0	0
2:9298667-9298975	AT2G21800,	2	+	1	0	0	0	4	0	2	1	0	0	0	0	0	2	0	0
2:11212205-11212579	AT2G26330,	3	-	1	1	1	0	0	0	0	0	0	0	0	0	0	2	2	3
2:15703664-15703822	AT2G37420,	1	+	0	0	0	0	1	0	0	3	0	0	2	0	0	2	0	2
2:15910350-15910878	AT2G38020,	3	-	0	1	0	0	0	2	2	1	0	0	1	1	0	1	0	1
2:15990229-15991951	AT2G38170,	6	-	0	1	0	0	0	0	0	0	0	3	2	0	0	1	0	3
3:1117480-1117877	AT3G04240,	2	-	0	0	0	0	1	1	0	2	0	0	0	1	0	1	0	4
3:4323287-4323467	AT3G13330,	2	-	0	0	1	0	0	5	0	1	0	0	0	0	0	2	0	1
3:4470352-4470862	AT3G13670,	3	+	0	0	1	0	0	0	0	3	0	0	0	1	0	4	0	1
3:5454979-5455550	AT3G16080,	1	+	0	2	0	2	0	0	0	3	0	0	0	0	0	2	0	1
3:7310586-7311703	AT3G20870,	5	-	0	0	0	3	2	1	0	1	0	0	0	0	0	1	1	1
3:7831735-7833556	AT3G22190,	5	-	1	1	0	0	0	3	1	0	1	0	0	0	0	3	0	0
3:7882859-7883484	AT3G22290,	3	+	0	0	1	2	1	0	2	1	0	0	1	0	0	2	0	0
3:9723487-9723688	AT3G26520,	1	+	0	0	0	4	2	1	1	0	0	0	0	0	0	1	1	0
3:15242481-15243368	AT3G43300,	5	-	0	0	0	0	2	2	3	0	1	1	0	0	0	1	0	0
3:17485584-17485769	AT3G47450,	1	-	0	0	0	0	1	0	1	0	0	1	1	2	0	2	1	1
3:19590833-19591290	AT3G52850,	2	+	2	0	3	2	0	0	0	1	0	0	0	1	0	1	0	0
3:21012665-21012920	AT3G56720,	2	+	0	2	2	0	1	0	0	1	1	0	0	0	0	2	0	1
4:186602-186897	AT4G00430,	1	-	0	0	0	3	1	0	1	3	0	0	0	0	0	1	1	0
4:16676620-16676871	AT4G35030,	1	+	0	0	0	0	2	3	2	2	0	0	0	0	0	1	0	0
5:185419-185909	AT5G01450,	3	-	0	0	3	0	0	0	0	3	0	0	0	0	0	1	1	2
5:207867-208101	AT5G01520,	1	+	0	0	0	0	0	0	3	0	0	0	0	6	0	1	0	0
5:236411-236593	AT5G01630,	1	-	0	0	0	0	0	2	0	0	0	0	0	0	0	1	7	0
5:367434-367863	AT5G01950,	3	-	0	0	1	0	1	0	2	1	0	0	1	0	0	2	0	2
5:1370075-1370441	AT5G04740,	2	-	0	0	0	0	1	1	3	4	0	0	0	0	0	1	0	0
5:1477269-1477620	AT5G05010,	2	+	0	0	0	0	0	0	0	0	1	0	1	3	0	2	2	1
5:7389093-7389666	AT5G22320,	4	-	1	0	1	1	0	0	2	0	0	0	0	1	0	2	2	0
5:10905158-10905792	n/a		-	0	0	0	0	0	0	0	0	0	0	0	0	0	3	2	5
5:14743424-14744184	AT5G37247,	3	-	0	1	0	0	0	4	4	0	0	0	0	0	0	1	0	0
5:17558524-17558868	AT5G43720,	2	-	0	1	0	0	2	1	0	0	0	0	0	0	0	3	2	1
5:20108136-20108467	AT5G49555,	2	-	0	0	0	0	0	2	0	5	1	0	1	0	0	1	0	0
5:20199407-20199717	AT5G49720,	1	-	0	0	0	2	1	1	0	1	0	0	1	0	0	1	3	0
5:24198483-24198668	AT5G60100,	1	-	2	2	0	3	0	0	0	0	0	0	0	0	0	1	2	0
5:24966362-24967427	AT5G62165,	3	+	0	0	0	0	0	5	3	1	0	0	0	0	0	1	0	0
1:123579-124123	AT1G01320,	3	-	0	0	0	3	0	0	0	0	1	0	0	2	0	0	4	0
1:5623241-5623803	AT1G16470,	4	+	1	0	0	0	3	0	0	1	0	0	0	1	0	0	2	2
1:6086005-6086319	AT1G17690,	2	-	0	1	1	2	2	0	2	0	0	0	0	0	0	0	2	0
1:8467362-8467948	AT1G23935,	2	+	0	0	3	0	0	1	1	3	0	0	0	0	0	0	2	0
1:11266552-11266974	AT1G31480,	2	+	1	0	2	1	0	0	0	4	0	0	0	0	0	0	1	1
1:17897086-17897770	AT1G48420,	4	-	0	1	0	2	2	2	1	0	0	0	0	0	0	0	1	1
1:20062464-20063155	AT1G53730,	5	+	0	0	1	0	3	2	0	2	0	0	0	0	0	0	1	1
1:20413319-20413869	AT1G54680,	3	+	0	1	0	0	0	0	3	2	0	0	0	2	0	0	2	0
1:22027332-22028251	AT1G59840,	5	+	0	0	1	3	0	0	0	0	0	1	0	0	0	0	3	2
1:24134632-24134940	AT1G64970,	1	-	0	0	1	0	0	0	0	0	1	0	0	3	0	0	5	0
1:25494908-25495310	AT1G68010,	3	+	0	0	3	1	0	0	0	0	1	3	0	0	0	0	2	0
1:29174709-29174870	AT1G77630,	1	+	0	1	1	1	0	1	0	2	0	0	0	0	0	0	2	2
2:9658793-9658994	AT2G22720,	1	+	0	0	1	1	0	1	1	1	0	0	4	0	0	0	1	0
2:13159010-13159248	AT2G30920,	2	-	0	0	0	0	0	3	0	4	1	0	0	0	0	0	2	0
2:17916308-17916923	AT2G43080,	3	+	0	0	0	1	0	1	4	0	0	0	1	1	0	0	1	1
3:234340-234600	AT3G01610,	1	+	1	0	1	1	0	1	4	0	0	1	0	0	0	0	1	0
3:1330039-1330521	AT3G04840,	2	+	1	0	3	0	0	0	0	1	0	0	2	1	0	0	2	0
3:2172734-2172979	AT3G06880,	1	-	0	1	0	1	1	0	0	0	0	0	2	3	0	0	2	0
3:2481720-2482457	AT3G07770,	4	+	0	2	2	1	0	0	1	0	0	0	2	0	0	0	2	0
3:2560189-2560451	AT3G08020,	2	-	0	0	1	2	1	0	1	0	0	0	0	1	0	0	2	2
3:3236597-3236747	AT3G10410,	1	-	0	0	0	0	0	0	1	1	0	0	3	2	0	0	2	1
3:3714129-3714502	AT3G11745,	2	-	1	1	1	0	0	0	0	1	0	0	2	0	0	0	3	1
3:6864987-6865318	AT3G19760,	2	+	0	0	1	1	0	1	1	1	0	0	1	1	0	0	3	0
3:6986337-6987506	AT3G20020,	4	-	0	0	1	1	0	2	1	3	0	0	0	1	0	0	1	0
3:9674729-9674938	AT3G26430,	1	+	0	1	0	2	1	1	1	3	0	0	0	0	0	0	1	0
3:15819881-15820170	AT3G44050,	2	+	1	1	0	0	0	4	1	1	0	0	1	0	0	0	1	0
3:16805926-16806810	AT3G45770,	5	-	0	0	0	0	1	4	0	0	0	1	0	0	0	0	2	2
3:17173557-17174520	n/a		-	0	0	0	2	1	5	0	0	0	0	0	0	0	0	1	1
3:22623152-22623430	AT3G61130,	2	+	0	0	0	2	1	0	2	2	0	0	0	0	0	0	1	2
4:7937483-7938039	AT4G13640,	4	-	0	1	1	2	0	1	1	0	0	0	0	0	0	0	4	0
4:14834315-14834471	AT4G30310,	1	+	0	0	2	0	0	2	0	0	0	0	3	1	0	0	1	1
4:15850770-15851342	AT4G32850,	3	+	2	0	2	0	1	0	0	3	0	0	0	0	0	0	2	0
4:16007117-16007338	AT4G33200,	1	-	0	2	0	1	1	1	0	0	0	0	3	1	0	0	1	0
4:17281016-17282607	AT4G36648,	2	-	0	0	0	0	0	2	3	2	0	0	0	1	0	0	2	0
4:17547101-17547270	AT4G37280,	1	-	0	1	2	0	0	1	0	3	0	2	0	0	0	0	1	0
5:252762-253428	AT5G01670,	3	+	0	0	0	0	0	0	3	1	0	0	2	3	0	0	1	0
5:4760989-4761279	AT5G14740,	2	+	1	2	0	4	0	0	0	0	0	2	0	0	0	0	1	0
5:5596753-5597353	AT5G17020,	4	+	1	2	0	0	0	0	1	1	1	1	0	1	0	0	1	1
5:6194178-6194569	AT5G18610,	1	+	0	0	0	0	0	3	1	2	0	0	1	0	0	0	3	0
5:6524750-6525386	AT5G19370,	3	-	0	0	2	1	1	2	2	0	0	1	0	0	0	0	1	0
5:6599148-6599463	AT5G19550,	2	+	2	0	0	1	0	2	2	0	0	0	0	0	0	0	3	0
5:6653566-6653963	AT5G19690,	3	+	1	0	0	0	2	1	0	0	0	0	3	0	0	0	2	1
5:7582660-7593192	n/a		-	0	0	0	1	1	0	0	3	0	0	0	2	0	0	2	1
5:7794067-7794444	AT5G23155,	2	+	0	0	1	0	0	0	1	3	0	0	0	1	0	0	3	1
5:8969498-8970343	AT5G25770,	5	-	0	0	0	0	0	1	2	4	0	0	2	0	0	0	1	0
5:14535384-14535633	AT5G36880,	1	-	1	1	0	3	4	0	0	0	0	0	0	0	0	0	1	0
5:15008897-15009211	AT5G37790,	2	-	0	0	2	1	0	0	2	3	0	1	0	0	0	0	1	0
5:20248578-20248865	AT5G49820,	2	-	0	2	0	0	0	2	1	1	0	0	1	0	0	0	1	2
1:4017960-4018394	AT1G11910,	3	-	0	0	4	0	0	0	0	1	0	1	2	1	0	0	0	1
1:6035859-6036410	AT1G17550,	2	+	1	0	1	1	1	1	0	0	2	1	1	0	0	0	0	1
1:8337733-8338058	AT1G23490,	2	+	0	2	2	0	0	0	2	1	0	0	2	0	0	0	0	1
1:20608608-20608976	AT1G55250,	2	+	0	0	0	1	1	3	0	1	0	0	0	1	0	0	0	3
2:9498143-9498763	AT2G22360,	3	+	4	0	2	1	0	1	0	0	0	0	0	0	0	0	0	2
2:9775477-9776106	AT2G22970,	2	+	0	0	0	0	1	0	0	4	0	0	3	0	0	0	0	2
2:16931572-16932139	AT2G40540,	2	+	1	3	1	0	2	0	0	0	1	0	1	0	0	0	0	1
3:5441659-5441869	AT3G16030,	1	+	0	0	0	1	0	0	1	3	0	0	1	1	0	0	0	3
3:5910836-5911519	AT3G17310,	3	-	1	0	3	0	1	0	0	4	0	0	0	0	0	0	0	1
3:23078757-23079099	AT3G62360,	2	-	0	1	2	0	0	1	0	4	0	0	1	0	0	0	0	1
4:11034740-11034896	AT4G20480,	1	-	0	3	1	1	0	0	2	2	0	0	0	0	0	0	0	1
4:14678820-14679220	AT4G30020,	1	+	0	0	0	0	2	2	0	1	0	1	0	0	0	0	0	4
5:4177480-4178479	AT5G13160,	2	+	0	0	1	0	0	2	2	2	0	1	0	0	0	0	0	2
5:5595534-5595823	AT5G17020,	2	+	0	1	1	0	0	0	2	4	0	0	0	1	0	0	0	1
5:20827852-20828861	AT5G51230,	4	+	0	0	4	0	0	1	1	1	0	0	0	0	0	0	0	3
5:25686782-25687521	AT5G64220,	3	+	0	0	0	0	2	3	2	1	0	0	0	1	0	0	0	1
5:25884962-25885158	AT5G64740,	1	+	1	0	1	2	0	1	0	2	0	0	2	0	0	0	0	1
5:26640049-26640545	AT5G66720,	1	-	1	2	0	1	0	4	0	0	0	0	0	0	0	0	0	2
3:10963899-10965636	n/a		-	0	0	0	0	0	4	4	2	0	0	0	0	0	0	0	0
3:16125802-16126427	AT3G44540,	3	+	0	0	0	0	4	1	5	0	0	0	0	0	0	0	0	0
5:15023284-15026752	n/a		+	1	2	0	1	0	6	0	0	0	0	0	0	0	0	0	0
1:20726497-20727112	AT1G55520,	4	-	2	1	4	2	0	0	0	0	0	0	1	0	0	0	0	0
5:22306027-22306885	AT5G54930,	1	-	0	0	5	0	0	2	1	1	0	0	1	0	0	0	0	0
1:6410558-6410854	AT1G18620,	1	+	0	1	2	2	0	0	0	0	2	0	1	2	0	0	0	0
5:8185542-8185935	AT5G24160,	2	-	1	2	1	1	0	0	0	0	1	0	2	2	0	0	0	0
5:13832473-13833019	AT5G35630,	3	+	2	1	0	2	0	0	0	0	2	0	1	2	0	0	0	0
5:25696331-25696661	AT5G64240,	1	+	0	1	0	1	0	0	1	1	1	2	2	1	0	0	0	0
1:11987130-11987671	AT1G33080,	1	+	0	1	1	1	0	0	2	0	0	3	0	2	0	0	0	0
1:18066422-18067030	AT1G48850,	3	-	0	0	0	3	0	0	1	4	0	2	0	0	0	0	0	0
4:12870389-12870689	AT4G25050,	2	+	0	1	4	0	0	0	0	0	0	1	0	4	0	0	0	0
1:5566449-5567151	AT1G16270,	3	+	0	0	6	0	0	0	1	1	0	0	2	0	0	0	0	0
1:12209211-12209501	AT1G33700,	1	-	0	0	0	0	0	1	3	5	0	0	1	0	0	0	0	0
1:21209106-21209274	AT1G56600,	1	-	0	0	0	0	0	0	2	5	0	0	2	1	0	0	0	0
1:29951881-29952108	AT1G79600,	1	-	0	1	0	0	0	1	2	0	0	0	2	4	0	0	0	0
2:19592088-19593106	AT2G47830,	4	-	0	1	0	1	0	2	1	4	0	0	1	0	0	0	0	0
3:3557272-3557506	AT3G11340,	1	+	0	0	0	0	3	0	2	4	0	0	1	0	0	0	0	0
5:7053206-7053398	AT5G20830,	1	-	0	0	0	0	0	0	6	2	0	0	2	0	0	0	0	0
2:15146007-15146408	AT2G36070,	3	-	0	0	0	2	2	0	0	5	0	0	0	1	0	0	0	0
3:2267260-2267597	AT3G07160,	2	-	0	2	2	0	0	0	1	3	0	0	0	2	0	0	0	0
4:18226902-18227396	AT4G39120,	3	-	2	0	0	2	1	1	3	0	0	0	0	1	0	0	0	0
1:226396-226691	AT1G01620,	1	-	3	0	1	1	3	1	0	1	0	0	0	0	0	0	0	0
1:21009946-21010144	AT1G56145,	1	-	0	0	0	1	1	1	1	6	0	0	0	0	0	0	0	0
5:7705-8139	AT5G01020,	1	-	2	0	1	2	2	1	1	1	0	0	0	0	0	0	0	0
5:14738507-14739714	n/a		-	1	1	0	1	2	4	1	0	0	0	0	0	0	0	0	0
5:23266693-23267225	AT5G57410,	3	-	0	0	0	1	2	0	2	5	0	0	0	0	0	0	0	0
5:4659161-4659333	AT5G14450,	1	+	0	0	3	3	0	1	2	1	0	0	0	0	0	0	0	0
5:25270514-25270705	AT5G62960,	1	+	0	0	2	0	0	2	2	4	0	0	0	0	0	0	0	0
5:19013170-19013835	AT5G46860,	3	-	0	0	0	0	0	0	6	4	0	0	0	0	0	0	0	0
3:16434072-16434359	AT3G44970,	2	+	1	2	5	2	0	0	0	0	0	0	0	0	0	0	0	0
4:13474690-13474839	AT4G26740,	1	-	1	3	3	3	0	0	0	0	0	0	0	0	0	0	0	0
Pt:997-1387	ATCG00020,	1	+	2	0	3	5	0	0	0	0	0	0	0	0	0	0	0	0
1:404912-405485	AT1G02145,	4	+	0	1	1	0	0	0	0	0	1	0	0	2	1	1	0	2
1:1513994-1514265	AT1G05230,	1	-	2	1	0	0	0	0	0	0	0	0	0	0	1	2	3	0
1:9381957-9382109	AT1G27030,	1	+	0	0	0	0	1	3	4	0	0	0	0	0	1	0	0	0
1:11333027-11333248	AT1G31660,	1	-	0	0	0	0	0	1	3	3	0	0	0	0	1	1	0	0
1:11481150-11481856	AT1G31970,	5	+	0	0	1	0	1	0	1	1	1	0	1	0	2	0	0	1
1:19410139-19410908	AT1G52150,	3	-	1	0	3	0	0	2	1	0	0	0	0	0	2	0	0	0
1:19523853-19524061	AT1G52410,	2	+	0	0	0	0	0	1	0	1	0	0	0	0	3	1	1	2
1:20389983-20390321	AT1G54580,	2	+	0	0	0	0	1	1	1	0	0	0	1	0	1	1	1	2
1:23881926-23882182	AT1G64350,	2	+	0	1	0	0	0	0	0	3	0	0	0	0	4	0	0	1
1:27243295-27243514	AT1G72370,	1	-	0	0	1	0	0	0	1	0	0	0	2	2	1	0	0	2
1:28152512-28153283	AT1G74960,	4	-	0	0	1	3	0	0	0	0	0	0	0	1	2	1	0	1
1:29663049-29663243	AT1G78900,	1	+	0	2	0	0	0	2	0	1	0	0	0	0	1	0	2	1
2:13772416-13772784	AT2G32430,	2	+	0	0	0	0	0	3	0	2	0	1	0	0	1	0	0	2
2:16291612-16291780	AT2G39010,	1	-	0	0	1	0	0	0	0	0	0	0	2	1	1	0	1	3
2:18047878-18048032	AT2G43465,	1	-	0	0	0	0	0	3	0	2	0	0	1	0	1	2	0	0
3:3917592-3917821	AT3G12280,	2	-	0	1	0	0	0	2	0	2	0	0	0	0	2	2	0	0
3:4856536-4857695	n/a		+	1	0	0	0	0	1	0	0	0	0	2	1	2	1	1	0
3:10033829-10034530	n/a		-	0	0	0	0	1	3	0	0	0	0	0	0	2	3	0	0
4:1408786-1409507	AT4G03200,	4	+	0	0	3	0	0	0	0	0	0	1	0	3	1	0	0	1
4:9235061-9236100	AT4G16340,	4	-	0	0	1	0	0	1	1	3	0	0	0	0	1	0	0	2
4:12782449-12782667	AT4G24800,	1	+	0	0	0	0	0	0	0	5	0	2	0	0	1	0	1	0
4:12834648-12835078	AT4G24970,	3	+	1	0	1	0	0	0	0	0	0	2	0	0	1	0	4	0
4:15344713-15345007	AT4G31690,	1	-	0	0	0	0	0	0	0	0	0	0	0	0	2	1	3	3
4:18042011-18042492	AT4G38600,	3	-	0	0	0	0	0	0	1	1	0	0	2	2	2	0	0	1
4:18112513-18112845	AT4G38790,	2	+	0	0	0	0	1	1	3	1	0	0	0	1	1	0	1	0
4:18210397-18211152	AT4G39080,	3	+	0	0	2	0	1	0	0	3	0	0	0	0	1	0	2	0
5:1477083-1477620	AT5G05010,	3	+	0	1	0	1	1	0	2	0	0	0	0	2	1	0	0	1
5:2152648-2153035	AT5G06950,	3	+	1	0	0	1	0	0	0	2	0	0	0	0	1	0	0	4
5:2323488-2323697	AT5G07350,	1	-	0	0	0	0	0	0	1	4	0	0	0	0	3	1	0	0
5:3954846-3955343	AT5G12230,	2	-	0	0	0	0	3	1	2	0	0	0	0	1	1	1	0	0
5:4330118-4330836	AT5G13480,	4	-	1	0	0	2	0	0	2	0	0	0	0	1	1	0	0	2
5:9037525-9037881	AT5G25900,	1	+	0	0	0	0	0	1	0	2	0	0	2	0	3	0	0	1
5:9783840-9784399	AT5G27640,	2	-	0	0	0	0	1	1	1	0	0	0	0	2	1	0	2	1
5:9873338-9873649	AT5G27850,	2	+	0	0	0	0	1	2	0	0	1	0	0	1	1	0	2	1
5:10008822-10009524	AT5G27970,	4	+	2	0	0	0	0	1	1	0	2	0	1	0	1	0	1	0
5:15517280-15521015	n/a		+	1	0	0	0	0	4	1	0	0	0	0	0	1	0	2	0
5:16816422-16816606	AT5G42050,	1	+	0	0	0	1	0	0	0	4	0	0	2	1	1	0	0	0
5:23078454-23078787	AT5G57030,	2	+	1	1	2	1	0	0	0	0	0	0	0	1	1	0	0	2
5:23525403-23525585	AT5G58140,	1	+	0	0	0	1	0	0	0	0	0	0	4	0	4	0	0	0
1:4369757-4370252	AT1G12820,	1	-	0	0	0	0	0	0	0	4	0	0	4	0	0	1	0	0
1:5500685-5500902	AT1G16020,	1	+	1	0	1	2	0	0	2	1	0	0	0	0	0	2	0	0
1:6602832-6602984	AT1G19110,	1	+	0	1	0	4	1	1	0	0	1	0	0	0	0	1	0	0
1:11077478-11078000	AT1G31050,	1	-	0	0	0	0	0	1	5	1	0	0	0	0	0	2	0	0
1:11257595-11257743	AT1G31440,	1	-	0	1	0	0	1	0	0	0	0	0	0	2	0	2	2	1
1:19949629-19949827	AT1G53440,	1	+	0	0	1	0	0	3	0	0	0	2	1	0	0	1	0	1
1:22882815-22883427	AT1G61900,	3	-	2	0	2	2	0	0	0	1	0	0	0	0	0	1	1	0
1:24078835-24079001	AT1G64790,	1	-	0	3	3	0	0	0	0	1	0	1	0	0	0	1	0	0
1:27671799-27671942	AT1G73600,	1	+	0	2	0	0	1	2	0	0	0	3	0	0	0	1	0	0
1:29775437-29775987	AT1G79150,	2	-	0	0	2	0	1	1	0	0	0	0	0	3	0	2	0	0
2:166935-167071	AT2G01350,	1	-	0	1	0	1	1	2	0	0	0	2	0	1	0	1	0	0
2:7664556-7665071	AT2G17620,	3	+	0	1	0	0	1	0	2	1	0	0	0	0	0	1	3	0
2:9450321-9450639	AT2G22230,	2	+	0	0	4	0	0	3	0	1	0	0	0	0	0	1	0	0
2:11312133-11314742	AT2G26590,	8	-	0	0	0	0	1	0	3	0	0	0	1	0	0	1	2	1
2:12268037-12268698	AT2G28620,	4	-	0	2	0	0	0	0	1	0	0	0	0	0	0	3	3	0
2:15001500-15001909	AT2G35690,	2	+	0	0	2	2	0	0	0	1	1	0	0	0	0	3	0	0
3:3509879-3510101	AT3G11200,	1	-	0	1	0	1	2	0	0	1	0	0	0	1	0	1	0	2
3:3832484-3832838	AT3G12020,	2	+	0	2	0	0	0	0	0	0	0	0	4	1	0	2	0	0
3:4628775-4629836	AT3G13990,	3	-	0	0	0	0	2	0	0	2	0	0	3	0	0	1	0	1
3:8670858-8671342	AT3G23990,	3	+	0	0	0	1	0	0	1	4	0	0	0	0	0	1	2	0
3:9963301-9963883	AT3G27020,	3	-	0	2	0	3	0	0	0	1	0	0	0	0	0	1	2	0
3:18565919-18566120	AT3G50070,	1	-	0	0	0	0	0	0	0	0	0	0	0	0	0	2	2	5
3:18690608-18690872	AT3G50380,	1	-	0	1	0	3	0	0	0	4	0	0	0	0	0	1	0	0
3:19962181-19962411	AT3G53920,	1	-	0	0	0	0	0	0	1	2	0	0	2	1	0	3	0	0
3:22978418-22978615	AT3G62050,	1	+	0	1	0	1	0	0	1	2	0	0	0	0	0	1	3	0
4:96460-96673	AT4G00230,	1	+	0	0	0	0	0	0	0	2	0	0	0	2	0	1	3	1
4:7135898-7136128	AT4G11860,	1	-	0	0	0	0	1	0	2	0	0	0	2	1	0	1	2	0
4:12318741-12319311	AT4G23630,	3	+	0	0	0	0	0	4	0	1	0	0	0	0	0	1	2	1
4:12552270-12552674	AT4G24190,	1	-	0	0	0	0	0	3	1	0	0	0	0	0	0	5	0	0
4:14352828-14353729	AT4G29130,	4	-	0	2	0	0	0	0	0	1	0	0	0	4	0	1	0	1
4:14499101-14499360	AT4G29540,	2	+	0	1	0	0	0	2	0	3	0	0	0	0	0	1	0	2
4:16032191-16033227	AT4G33240,	3	-	0	0	0	3	0	0	0	1	0	0	4	0	0	1	0	0
4:16885191-16885455	AT4G35560,	1	+	0	0	1	0	0	0	3	2	0	0	0	2	0	1	0	0
4:17933917-17934117	AT4G38240,	2	-	0	0	0	1	1	0	0	4	0	0	0	0	0	1	1	1
5:1402317-1403820	AT5G04830,	6	-	1	0	0	1	0	1	0	0	0	0	4	1	0	1	0	0
5:1786428-1786783	AT5G05940,	2	+	1	0	0	0	0	1	3	2	0	0	0	0	0	1	1	0
5:2320609-2320986	AT5G07350,	1	-	0	0	0	1	0	1	0	4	0	0	0	1	0	1	1	0
5:4887627-4887960	AT5G15080,	2	+	0	0	0	0	1	2	2	0	0	0	0	0	0	3	1	0
5:7052790-7053125	AT5G20830,	1	-	0	0	0	0	0	2	1	2	0	0	3	0	0	1	0	0
5:8429572-8430069	n/a		+	0	1	0	0	0	0	6	0	0	0	0	1	0	1	0	0
5:9875020-9875854	AT5G27860,	5	-	0	1	0	0	0	1	0	6	0	0	0	0	0	1	0	0
5:16759677-16759851	AT5G41870,	1	-	0	1	1	0	0	0	0	0	0	0	2	2	0	1	1	1
5:22430550-22430718	AT5G55310,	1	-	1	1	0	0	0	0	1	0	0	2	1	0	0	2	1	0
5:25719233-25719454	AT5G64300,	1	+	0	1	0	1	1	0	0	2	1	0	1	1	0	1	0	0
5:26154452-26154676	AT5G65440,	1	+	0	0	0	0	1	3	1	0	0	1	0	2	0	1	0	0
5:26956300-26956846	AT5G67580,	3	-	0	2	1	0	0	2	0	0	1	0	0	0	0	2	0	1
Mt:189347-189524	n/a		+	0	0	0	0	1	0	2	1	0	0	0	0	0	1	2	2
1:2181761-2182136	AT1G07110,	3	-	0	0	1	2	2	0	0	1	0	1	0	1	0	0	1	0
1:4920359-4920804	AT1G14380,	2	-	0	0	0	0	1	2	0	1	0	0	0	0	0	0	2	3
1:11541763-11542103	AT1G32090,	1	-	0	1	0	2	2	0	0	1	0	0	0	0	0	0	3	0
1:17724249-17724858	AT1G48050,	2	+	0	0	0	2	0	2	1	1	0	1	0	1	0	0	1	0
1:18098905-18099075	AT1G48920,	1	+	0	0	1	3	0	1	0	0	0	0	2	0	0	0	2	0
1:18418935-18419129	AT1G49760,	1	+	0	0	0	0	0	0	2	3	0	2	0	1	0	0	1	0
1:19126296-19126679	AT1G51580,	1	+	0	0	0	0	0	2	0	5	0	0	0	0	0	0	1	1
1:19369704-19370079	AT1G52080,	2	+	0	1	0	0	1	1	0	3	0	0	0	1	0	0	2	0
1:19523871-19524061	AT1G52410,	2	+	0	0	0	0	1	0	0	0	0	0	0	2	0	0	6	0
1:21091328-21091691	AT1G56340,	1	-	1	0	0	1	1	0	0	2	0	0	0	0	0	0	4	0
1:21328453-21328816	AT1G57590,	2	-	0	0	0	0	0	0	0	0	0	0	4	4	0	0	1	0
1:22223567-22223927	AT1G60270,	3	-	0	1	0	2	0	0	2	2	0	0	0	0	0	0	2	0
1:24077898-24078622	AT1G64790,	4	-	0	0	0	0	0	1	1	2	0	0	0	0	0	0	3	2
1:30229258-30229594	AT1G80410,	2	-	2	0	1	0	0	0	0	2	1	1	0	0	0	0	2	0
2:7356833-7357118	AT2G16950,	2	+	0	0	0	2	2	0	0	0	0	0	0	2	0	0	3	0
2:8999195-8999546	AT2G20920,	1	+	0	1	0	3	0	1	2	0	0	0	0	1	0	0	1	0
2:9216698-9216964	AT2G21520,	1	+	0	2	0	0	2	1	1	0	0	0	0	0	0	0	1	2
2:9352093-9352569	AT2G21940,	3	+	0	0	0	2	0	0	5	0	0	0	0	0	0	0	2	0
2:12063401-12063690	AT2G28290,	2	+	0	0	2	0	0	1	0	0	0	0	0	1	0	0	4	1
2:13197915-13198627	AT2G31010,	3	+	0	0	1	0	0	1	1	3	0	0	0	0	0	0	1	2
2:13340385-13341015	AT2G31280,	4	+	0	0	0	0	2	1	0	4	0	0	0	0	0	0	1	1
2:13428422-13428711	AT2G31530,	2	+	2	0	0	0	0	0	4	0	0	0	0	2	0	0	1	0
2:14213969-14214484	AT2G33560,	3	-	0	1	1	0	0	3	0	2	0	0	0	0	0	0	2	0
2:14802956-14803544	AT2G35110,	2	-	0	0	0	0	2	0	0	2	1	0	0	0	0	0	4	0
2:14968881-14969494	AT2G35630,	3	+	0	0	2	0	0	0	2	3	0	0	0	0	0	0	1	1
2:17018127-17018358	AT2G40770,	1	-	0	0	0	0	0	2	0	0	0	3	0	0	0	0	4	0
2:17045365-17045730	AT2G40840,	1	+	0	1	2	2	0	0	1	0	0	0	0	2	0	0	1	0
3:287046-287384	AT3G01800,	3	+	0	0	0	1	3	1	0	2	0	0	0	0	0	0	1	1
3:2592641-2593241	AT3G08530,	3	-	0	2	0	1	1	1	2	0	0	0	0	0	0	0	2	0
3:3140070-3140225	AT3G10160,	1	-	0	1	0	1	0	0	0	0	0	0	2	3	0	0	1	1
3:4807395-4807815	AT3G14390,	2	+	0	1	1	0	1	0	1	2	0	0	1	0	0	0	2	0
3:6924282-6924560	AT3G19900,	1	-	0	0	0	0	0	1	1	0	0	0	3	2	0	0	2	0
3:9339807-9340311	AT3G25660,	3	-	0	0	2	0	0	2	1	0	0	0	0	2	0	0	1	1
3:9455084-9455289	AT3G25840,	1	-	0	0	4	1	0	0	0	0	0	0	0	1	0	0	3	0
3:10485275-10486264	n/a		-	0	1	1	0	1	1	0	2	0	0	0	0	0	0	3	0
3:11155265-11155611	AT3G29185,	2	-	0	2	2	0	0	0	0	0	0	2	0	1	0	0	2	0
3:19590833-19591495	AT3G52850,	3	+	0	0	2	1	0	0	0	0	2	0	0	0	0	0	2	2
3:20637105-20637346	AT3G55630,	1	+	0	0	1	3	0	0	0	0	1	1	0	2	0	0	1	0
3:20815083-20815507	AT3G56090,	3	-	0	0	0	0	0	0	2	1	0	0	0	1	0	0	2	3
3:23454398-23455060	AT3G63520,	3	+	0	1	0	0	0	0	1	5	0	0	0	0	0	0	1	1
4:1363024-1363689	AT4G03080,	3	-	0	0	1	0	2	1	2	0	0	0	1	0	0	0	2	0
4:1502579-1503162	AT4G03410,	3	+	0	1	0	0	4	1	0	1	0	1	0	0	0	0	1	0
4:6662514-6663444	AT4G10843,	4	+	0	0	1	3	1	1	0	0	0	0	0	0	0	0	3	0
4:8983153-8983834	AT4G15790,	4	+	0	0	0	3	0	0	5	0	0	0	0	0	0	0	1	0
4:9489372-9490811	AT4G16860,	3	-	1	1	1	0	0	0	0	0	0	4	0	1	0	0	1	0
4:10877200-10877360	AT4G20110,	1	+	0	0	0	0	2	0	0	0	0	1	1	3	0	0	2	0
4:14251328-14252272	AT4G28880,	5	+	0	0	0	1	0	0	1	0	0	2	0	0	0	0	4	1
4:15307438-15307904	AT4G31580,	2	+	0	1	0	0	0	0	1	1	0	0	1	1	0	0	1	3
4:18261849-18262034	AT4G39210,	1	+	0	1	0	0	0	1	4	0	0	0	0	0	0	0	3	0
5:1315088-1315489	AT5G04560,	3	+	0	2	0	0	0	0	0	1	0	0	0	1	0	0	1	4
5:1883117-1883998	AT5G06220,	4	+	0	1	0	3	0	0	0	3	0	0	0	0	0	0	2	0
5:4347621-4347851	AT5G13530,	1	+	0	0	0	1	0	0	0	2	0	0	2	0	0	0	3	1
5:4659422-4659695	AT5G14450,	1	+	0	0	1	1	0	2	3	1	0	0	0	0	0	0	1	0
5:5039280-5039537	AT5G15530,	2	+	0	0	0	3	0	1	0	0	0	0	0	0	0	0	2	3
5:5640931-5641688	AT5G17160,	2	-	1	2	0	0	2	0	1	1	0	0	0	0	0	0	1	1
5:7472027-7472213	AT5G22500,	1	+	0	0	2	0	2	0	2	0	0	0	0	0	0	0	1	2
5:13587558-13587985	AT5G35360,	3	+	0	2	1	1	0	1	0	3	0	0	0	0	0	0	1	0
5:19320276-19320657	AT5G47690,	2	+	2	1	0	3	0	0	0	0	0	0	0	1	0	0	2	0
5:22604543-22604731	AT5G55850,	1	+	0	0	1	0	1	0	2	4	0	0	0	0	0	0	1	0
5:23111439-23112365	AT5G57110,	4	-	0	0	0	0	0	3	0	1	0	0	0	0	0	0	4	1
5:26711551-26712189	AT5G66880,	4	+	0	2	5	1	0	0	0	0	0	0	0	0	0	0	1	0
1:3956297-3956627	AT1G11720,	2	+	1	0	2	0	0	0	0	4	0	0	1	0	0	0	0	1
1:5251450-5252075	AT1G15270,	3	-	0	0	1	1	0	0	3	0	0	0	1	2	0	0	0	1
1:6189627-6190345	AT1G17980,	3	-	0	0	0	0	0	4	0	0	0	0	3	0	0	0	0	2
1:10798046-10798235	AT1G30490,	1	-	1	0	0	0	0	4	2	0	0	0	1	0	0	0	0	1
1:22265374-22265761	AT1G60430,	2	-	0	1	1	0	0	0	0	2	0	0	0	1	0	0	0	4
1:27243619-27243816	AT1G72370,	1	-	0	0	0	0	0	2	2	1	0	1	1	0	0	0	0	2
1:29991804-29992162	AT1G79700,	3	-	0	1	2	0	1	1	0	1	0	1	0	0	0	0	0	2
2:269324-270206	AT2G01600,	5	+	2	0	0	1	0	0	2	2	0	0	1	0	0	0	0	1
2:19572317-19572716	AT2G47790,	2	-	0	0	2	0	0	1	0	2	0	0	0	3	0	0	0	1
3:10484775-10487122	n/a		-	0	1	0	2	2	3	0	0	0	0	0	0	0	0	0	1
4:1512385-1512605	AT4G03420,	1	+	0	0	1	1	0	0	3	3	0	0	0	0	0	0	0	1
4:6662514-6663305	AT4G10843,	3	+	1	2	0	2	0	0	0	0	0	0	0	0	0	0	0	4
4:14909141-14909485	AT4G30520,	1	-	0	0	0	0	0	3	2	2	0	0	1	0	0	0	0	1
4:18557808-18558236	AT4G40040,	3	-	0	2	0	0	0	0	4	2	0	0	0	0	0	0	0	1
5:3920981-3921744	AT5G12130,	5	+	2	1	2	1	0	2	0	0	0	0	0	0	0	0	0	1
5:15406170-15406781	AT5G38470,	3	+	0	0	7	1	0	0	0	0	0	0	0	0	0	0	0	1
5:17544713-17545028	AT5G43680,	2	+	1	0	1	0	0	0	2	0	0	1	1	1	0	0	0	2
5:19088012-19088200	AT5G47020,	1	+	0	0	0	2	0	1	0	1	1	0	1	2	0	0	0	1
5:20805480-20805961	AT5G51200,	3	+	1	0	0	1	0	0	1	4	0	1	0	0	0	0	0	1
5:22370696-22370881	AT5G55120,	1	+	0	0	0	0	1	0	0	3	0	1	1	1	0	0	0	2
4:12019282-12019621	AT4G22930,	2	+	1	0	1	0	0	2	1	1	0	1	1	1	0	0	0	0
1:30009547-30009798	AT1G79750,	2	-	0	2	0	0	0	1	2	3	0	0	0	1	0	0	0	0
3:4390903-4391137	AT3G13470,	1	+	0	1	1	3	0	2	0	1	1	0	0	0	0	0	0	0
3:21290990-21291526	AT3G57520,	2	-	0	0	0	0	0	0	3	3	0	1	2	0	0	0	0	0
3:21722439-21725765	n/a		-	0	1	0	0	0	0	0	0	0	2	6	0	0	0	0	0
4:18408825-18409109	AT4G39660,	2	+	0	0	0	0	1	3	1	1	0	1	1	1	0	0	0	0
3:1330384-1330816	AT3G04840,	2	+	0	0	1	0	1	1	3	1	0	1	1	0	0	0	0	0
1:5001998-5002413	AT1G14600,	2	-	0	0	2	1	0	0	0	0	1	0	3	2	0	0	0	0
1:7576585-7577346	AT1G21610,	4	+	0	2	0	0	0	2	1	2	1	1	0	0	0	0	0	0
4:16702490-16702767	AT4G35090,	1	-	0	0	0	1	0	0	0	0	1	1	6	0	0	0	0	0
1:2670607-2670799	AT1G08450,	1	-	0	0	1	0	1	0	0	0	0	2	1	4	0	0	0	0
1:26535285-26536517	AT1G70410,	4	-	0	0	0	1	0	1	1	3	0	2	0	1	0	0	0	0
3:195179-196725	AT3G01500,	8	-	0	2	1	1	0	0	0	0	0	5	0	0	0	0	0	0
3:17169794-17170605	AT3G46614,	5	-	0	0	0	0	0	6	1	0	0	2	0	0	0	0	0	0
4:16371155-16371384	AT4G34180,	1	+	0	0	0	3	0	1	0	4	0	1	0	0	0	0	0	0
5:8632965-8633135	AT5G25050,	1	+	0	1	0	4	1	0	1	1	0	1	0	0	0	0	0	0
5:25500613-25500756	AT5G63710,	1	+	0	0	0	0	1	1	0	4	0	2	0	1	0	0	0	0
1:1795528-1795955	AT1G05910,	2	+	0	0	0	0	0	2	3	1	0	0	3	0	0	0	0	0
1:18525495-18525916	AT1G50030,	2	-	2	0	0	1	2	0	2	0	0	0	1	1	0	0	0	0
1:21209121-21209274	AT1G56600,	1	-	0	0	0	0	0	0	0	1	0	0	8	0	0	0	0	0
1:26586157-26586491	AT1G70520,	2	-	0	0	0	0	0	0	3	2	0	0	3	1	0	0	0	0
2:11681448-11681701	AT2G27300,	1	-	0	0	0	0	0	0	2	3	0	0	3	1	0	0	0	0
3:2559748-2560451	AT3G08020,	4	-	0	0	0	0	3	0	0	2	0	0	2	2	0	0	0	0
3:9312358-9312807	AT3G25610,	1	-	0	0	0	1	0	3	0	1	0	0	1	3	0	0	0	0
4:16966175-16966395	AT4G35800,	1	-	1	1	2	0	1	0	2	0	0	0	1	1	0	0	0	0
5:5576809-5579580	n/a		-	0	0	1	4	0	0	0	0	0	0	4	0	0	0	0	0
1:1782454-1782868	AT1G05890,	3	+	0	0	0	0	0	0	0	6	0	0	0	3	0	0	0	0
1:5297991-5298150	AT1G05163,AT1G15405,	1	+	0	0	0	0	0	0	0	0	0	0	0	9	0	0	0	0
1:23658611-23658786	AT1G63770,	1	-	0	0	0	4	0	0	1	3	0	0	0	1	0	0	0	0
1:25432287-25432666	AT1G67830,	1	-	1	0	3	0	0	0	2	2	0	0	0	1	0	0	0	0
1:27373970-27374213	AT1G72710,	2	+	0	0	0	0	0	1	5	2	0	0	0	1	0	0	0	0
3:4785187-4785586	AT3G14350,	3	-	0	0	0	0	0	0	1	6	0	0	0	2	0	0	0	0
5:4048050-4048283	AT5G12480,	1	-	1	3	1	0	0	3	0	1	0	0	0	0	0	0	0	0
1:24541363-24541704	AT1G65930,	2	+	0	1	2	1	1	0	0	4	0	0	0	0	0	0	0	0
1:28972900-28973577	AT1G77110,	3	+	0	0	0	1	4	0	2	2	0	0	0	0	0	0	0	0
3:5399469-5399968	AT3G15950,	4	-	0	0	3	1	1	2	0	2	0	0	0	0	0	0	0	0
3:20387701-20387873	AT3G55010,	1	+	0	1	0	0	2	2	4	0	0	0	0	0	0	0	0	0
4:11718029-11718606	AT4G22120,	3	-	0	3	0	0	1	2	0	3	0	0	0	0	0	0	0	0
4:14058464-14058784	AT4G28430,	2	+	1	0	1	0	2	3	0	2	0	0	0	0	0	0	0	0
5:23401555-23401852	AT5G57770,	2	-	0	0	0	0	1	3	3	2	0	0	0	0	0	0	0	0
5:24967328-24967882	AT5G62165,	1	+	0	0	0	0	2	0	1	6	0	0	0	0	0	0	0	0
1:457211-457429	AT1G02305,	1	+	0	0	0	2	0	2	0	5	0	0	0	0	0	0	0	0
1:1427899-1428389	AT1G05000,	3	+	0	0	0	0	0	1	4	4	0	0	0	0	0	0	0	0
3:7609637-7610197	AT3G21610,	3	-	0	0	2	1	0	1	2	3	0	0	0	0	0	0	0	0
3:23211765-23212143	AT3G62740,	3	+	0	0	0	0	0	1	4	4	0	0	0	0	0	0	0	0
2:16033727-16034587	AT2G38280,	4	-	0	1	0	0	0	0	4	4	0	0	0	0	0	0	0	0
3:19355572-19356462	AT3G52190,	3	-	1	0	2	1	0	0	0	5	0	0	0	0	0	0	0	0
5:1033052-1033382	AT5G03860,	1	-	0	0	4	5	0	0	0	0	0	0	0	0	0	0	0	0
1:313567-314225	AT1G01910,	3	-	0	0	3	0	0	0	0	1	0	1	1	0	1	0	0	1
1:1367613-1367934	AT1G04850,	2	-	0	1	0	0	0	0	3	3	0	0	0	0	1	0	0	0
1:1680121-1680505	AT1G05620,	2	+	0	0	0	0	2	2	0	0	0	1	0	0	1	0	2	0
1:4041991-4042294	AT1G11960,	2	-	0	0	0	0	0	1	4	0	0	1	0	0	1	0	1	0
1:5861173-5862258	AT1G17145,	6	-	0	1	0	3	0	0	1	1	0	0	0	0	1	0	0	1
1:6819110-6819313	AT1G19715,	1	-	0	1	0	0	0	0	0	0	0	0	0	2	1	3	0	1
1:8893375-8893793	AT1G25350,	3	-	0	0	0	0	1	3	0	1	0	0	0	0	1	1	0	1
1:10483640-10484201	AT1G29940,	3	-	0	0	1	1	0	2	0	0	0	0	0	0	1	1	2	0
1:19948157-19948564	AT1G53440,	3	+	0	0	0	0	0	1	2	0	0	0	0	1	2	2	0	0
1:22709902-22710348	AT1G61560,	3	-	0	0	0	1	1	1	0	0	0	0	0	0	1	4	0	0
1:23789824-23790676	AT1G64090,	4	+	1	0	0	0	0	0	0	0	0	0	0	0	3	3	0	1
1:25206899-25207829	AT1G67320,	7	-	0	1	0	0	2	1	0	3	0	0	0	0	1	0	0	0
1:29285385-29285561	AT1G77870,	1	+	0	0	0	0	0	0	0	1	0	0	0	0	1	0	5	1
1:30109693-30110621	AT1G80040,	2	-	0	0	0	0	0	0	0	5	0	0	0	0	2	0	0	1
1:30266115-30266294	AT1G80490,	1	-	0	0	0	1	0	2	0	1	0	0	0	0	1	2	0	1
1:30373957-30374200	AT1G80830,	1	-	0	0	0	0	0	2	0	0	0	0	2	0	1	0	0	3
2:2143936-2144478	AT2G05710,	3	+	0	0	0	2	1	0	0	2	0	0	0	0	1	1	1	0
2:9690650-9690899	AT2G22780,	2	-	0	0	1	3	1	0	0	0	0	0	0	1	1	0	1	0
2:11485186-11485479	AT2G26910,	2	+	1	1	2	1	0	0	1	0	1	0	0	0	1	0	0	0
2:12357453-12357756	AT2G28800,	2	-	0	0	1	0	0	0	0	0	3	1	0	0	2	1	0	0
2:13346488-13347057	AT2G31300,	3	-	0	0	0	0	0	3	0	4	0	0	0	0	1	0	0	0
2:13428422-13428905	AT2G31530,	3	+	0	0	2	0	0	0	1	0	0	1	0	0	1	0	3	0
2:14438029-14438549	AT2G34190,	3	+	0	1	0	3	0	0	0	0	0	0	0	0	1	0	3	0
2:14850698-14851115	AT2G35260,	3	+	0	0	4	1	0	0	0	0	0	0	0	1	1	0	1	0
2:15046602-15047237	AT2G35800,	3	+	0	0	0	1	0	1	0	2	0	0	0	0	1	0	1	2
2:15054084-15054567	AT2G35840,	2	+	0	0	0	0	0	2	0	2	1	0	0	0	1	0	1	1
2:15321969-15322600	AT2G36530,	3	-	0	2	1	1	0	0	1	1	0	0	0	0	2	0	0	0
2:16265766-16266230	AT2G38960,	2	+	0	0	0	0	0	1	2	0	0	0	0	3	1	0	0	1
2:19592316-19593106	AT2G47830,	3	-	1	1	0	0	0	0	0	0	0	0	0	1	1	0	4	0
2:19592646-19593106	AT2G47830,	2	-	0	0	0	0	0	3	0	0	0	1	0	0	1	0	3	0
3:126335-126631	AT3G01330,	2	-	0	0	0	0	0	0	1	0	0	0	0	0	1	3	3	0
3:523386-523850	AT3G02510,	3	-	0	2	0	2	0	0	0	1	0	0	1	0	1	1	0	0
3:855769-856195	AT3G03560,	3	-	0	0	0	1	0	3	0	0	0	0	1	1	1	1	0	0
3:1167579-1167989	AT3G04400,	2	+	0	0	2	0	0	2	0	0	0	0	2	0	1	0	0	1
3:2108249-2109014	AT3G06670,	4	-	0	0	0	1	0	0	2	2	0	0	1	0	1	0	0	1
3:2273408-2274300	AT3G07160,	3	-	0	0	0	0	0	1	0	2	0	0	0	1	2	0	1	1
3:4283022-4283413	n/a		+	0	0	1	2	0	0	1	0	0	0	0	2	1	0	1	0
3:4513181-4513475	AT3G13750,	2	+	0	1	1	1	1	0	0	0	0	1	0	0	1	2	0	0
3:6512178-6512359	AT3G18890,	1	+	0	0	0	3	0	0	0	0	0	0	4	0	1	0	0	0
3:8728338-8728793	AT3G24160,	2	+	0	0	2	0	0	0	0	0	2	1	0	0	1	0	1	1
4:942203-942543	AT4G02120,	3	+	0	3	0	0	1	0	0	0	0	0	0	0	3	0	0	1
4:2396097-2396249	AT4G04720,	1	-	0	2	1	2	0	0	0	0	0	1	0	1	1	0	0	0
4:6662514-6666001	n/a		+	1	2	0	0	1	3	0	0	0	0	0	0	1	0	0	0
4:14177063-14177435	AT4G28710,	2	+	0	0	0	0	0	0	0	2	0	0	2	0	2	2	0	0
4:14380966-14381440	AT4G29160,	1	+	2	0	0	0	0	1	2	1	0	0	0	0	1	0	1	0
4:15624272-15624417	AT4G32360,	1	+	1	1	0	1	0	2	0	0	0	0	1	0	2	0	0	0
4:16177206-16177493	AT4G33700,	2	-	0	0	0	1	0	1	0	0	0	0	0	0	2	4	0	0
5:1534699-1535137	AT5G05170,	2	-	1	0	0	0	0	1	1	0	0	0	0	0	1	1	2	1
5:1692811-1692973	AT5G05660,	1	-	0	0	0	0	0	0	0	0	0	0	4	0	2	0	2	0
5:4408088-4408547	AT5G13670,	2	-	0	0	1	0	0	0	0	0	0	0	0	0	1	0	4	2
5:5055468-5055721	AT5G15540,	1	-	2	0	0	0	1	1	0	1	0	0	0	2	1	0	0	0
5:7088408-7088825	AT5G20890,	2	-	0	0	0	0	0	1	1	0	0	1	2	1	1	1	0	0
5:8070875-8071234	AT5G23910,	3	+	0	0	0	0	2	1	0	0	0	0	0	0	1	0	4	0
5:8679275-8679655	AT5G25150,	3	+	0	0	0	0	0	0	3	0	0	0	1	0	2	0	1	1
5:10325328-10326150	AT5G28350,	5	+	0	2	2	0	0	0	0	2	0	0	1	0	1	0	0	0
5:14252681-14252859	AT5G36210,	1	-	0	0	0	2	0	0	1	3	0	0	0	0	2	0	0	0
5:15009294-15009472	AT5G37790,	1	-	0	0	0	0	0	2	1	1	0	0	0	0	3	0	0	1
5:15424835-15425688	AT5G38530,	2	+	1	1	0	2	0	0	0	0	1	0	1	1	1	0	0	0
5:17860201-17860470	AT5G44340,	1	-	1	0	1	1	0	0	1	0	0	0	0	0	1	0	3	0
5:18169499-18169979	AT5G45020,	2	+	1	0	0	1	2	0	2	0	0	0	0	0	1	0	0	1
5:19073064-19073234	AT5G47010,	1	+	0	0	0	1	0	1	1	0	0	2	0	1	1	1	0	0
5:20731539-20732310	AT5G50950,	5	+	0	0	1	0	0	0	0	0	0	2	1	0	1	1	0	2
5:21766490-21766718	AT5G53580,	1	-	0	2	2	1	0	0	0	0	0	0	1	0	1	1	0	0
5:22059962-22060198	AT5G54310,	2	-	0	0	0	0	1	2	2	0	0	0	0	0	3	0	0	0
5:22100513-22100742	AT5G54440,	1	+	0	0	0	0	1	1	0	0	1	0	0	0	1	3	1	0
5:22297684-22298033	AT5G54900,	2	+	0	1	0	0	0	1	0	1	0	0	0	0	2	1	0	2
5:23032918-23033315	AT5G56950,	2	+	0	1	1	0	0	0	3	0	0	0	1	0	2	0	0	0
5:24568725-24569125	AT5G61060,	2	-	1	0	1	1	0	0	1	1	0	0	1	1	1	0	0	0
5:25433387-25433672	AT5G63530,	1	+	0	2	0	0	0	0	0	0	0	0	0	0	1	2	0	3
1:250669-251066	AT1G01690,	2	+	0	0	0	0	0	1	2	2	1	0	0	0	0	1	0	1
1:1098718-1098936	AT1G04170,	1	+	0	0	0	1	0	0	0	0	2	0	0	2	0	3	0	0
1:2599010-2599210	AT1G08260,	1	+	0	1	0	1	0	0	3	1	0	0	0	0	0	1	1	0
1:5141445-5141696	AT1G14910,	2	-	0	0	0	0	0	0	0	2	0	0	0	0	0	1	2	3
1:6007735-6007995	AT1G17480,	1	-	0	0	0	0	0	1	1	2	0	0	0	0	0	1	3	0
1:9044696-9045511	AT1G26160,	4	-	2	2	0	0	1	1	0	0	0	0	0	0	0	2	0	0
1:9623972-9624734	AT1G27660,	3	+	0	1	1	0	0	0	0	3	0	0	1	1	0	1	0	0
1:11143690-11144198	AT1G31180,	3	-	0	0	0	0	0	1	0	1	0	0	2	0	0	2	2	0
1:16835871-16836374	AT1G44350,	2	-	0	0	0	0	0	0	1	1	0	0	0	0	0	1	4	1
1:17482513-17482951	AT1G47570,	3	+	0	0	1	0	0	0	1	0	0	0	2	0	0	3	0	1
1:18408373-18409198	AT1G49740,	3	+	0	0	0	1	0	1	0	0	0	1	0	0	0	4	1	0
1:18418363-18418631	AT1G49760,	2	+	0	0	0	0	0	0	1	2	0	0	1	1	0	3	0	0
1:20062782-20063011	AT1G53730,	2	+	0	1	1	1	2	0	0	2	0	0	0	0	0	1	0	0
1:21415795-21416144	AT1G57820,	2	-	0	0	0	0	2	1	0	1	0	2	0	0	0	1	1	0
1:21625393-21625634	AT1G58290,	1	-	0	1	2	0	0	0	0	0	0	2	0	0	0	1	2	0
1:27115351-27115491	AT1G72050,	1	+	0	0	0	1	0	1	0	0	0	0	1	1	0	3	0	1
1:27323296-27323616	AT1G72550,	2	-	0	0	0	1	0	1	0	3	0	1	1	0	0	1	0	0
1:28690760-28690945	AT1G76470,	1	-	0	0	0	0	0	0	1	1	0	0	1	0	0	1	2	2
1:30313179-30313441	AT1G80640,	2	+	0	0	0	1	1	1	0	0	0	0	0	0	0	1	2	2
2:4315525-4316383	AT2G10950,	2	-	0	0	1	0	1	0	1	0	0	0	0	0	0	3	2	0
2:7344966-7345776	AT2G16940,	4	-	0	0	1	0	3	0	0	0	0	1	0	1	0	1	0	1
2:9498460-9498763	AT2G22360,	2	+	0	0	3	0	0	2	0	1	0	0	0	0	0	2	0	0
2:9953996-9954317	AT2G23370,	2	-	0	0	1	1	0	0	0	0	0	0	1	1	0	2	0	2
2:12977765-12978677	AT2G30460,	3	-	1	0	2	0	0	1	0	0	1	0	0	1	0	2	0	0
2:13209970-13210303	AT2G31040,	2	-	0	1	0	0	0	0	0	1	1	1	0	0	0	1	3	0
2:13370094-13370820	AT2G31350,	3	+	0	0	0	0	0	2	2	1	0	1	0	1	0	1	0	0
2:13825667-13825845	AT2G32560,	1	+	0	0	0	3	0	0	2	0	0	0	0	0	0	1	0	2
2:14438627-14438772	AT2G34190,	1	+	0	0	0	0	0	2	0	2	0	0	0	0	0	1	0	3
2:14582244-14582646	AT2G34640,	3	-	0	0	1	1	0	1	0	1	0	0	0	0	0	2	1	1
2:15489431-15489730	AT2G36895,	2	-	0	0	0	0	0	0	1	0	0	0	1	2	0	2	1	1
2:15808404-15808577	AT2G37690,	1	+	0	0	0	0	0	0	1	0	0	0	2	1	0	1	0	3
3:99005-99577	AT3G01310,	3	-	0	1	0	1	1	0	0	0	2	0	0	0	0	2	1	0
3:190056-190198	AT3G01480,	1	+	0	1	0	0	0	0	0	0	0	1	0	2	0	1	3	0
3:1458761-1459038	AT3G05165,	2	-	1	0	2	0	0	1	0	0	0	1	2	0	0	1	0	0
3:1462441-1462786	AT3G05165,	2	-	0	0	0	0	1	1	1	3	0	0	0	0	0	1	0	1
3:1580789-1580979	AT3G05470,	1	-	0	3	0	0	0	0	0	0	0	0	1	0	0	2	1	1
3:2223766-2224500	AT3G07030,	4	-	0	0	0	0	1	2	0	0	0	0	0	0	0	1	4	0
3:3237156-3237530	AT3G10410,	2	-	0	0	0	1	0	0	0	3	0	1	1	1	0	1	0	0
3:4415156-4416003	AT3G13530,	4	-	0	0	1	2	1	2	0	0	0	1	0	0	0	1	0	0
3:18485359-18485646	AT3G49840,	2	+	0	0	1	0	3	2	0	0	0	1	0	0	0	1	0	0
3:20382321-20383068	AT3G55000,	2	+	0	0	0	0	1	0	0	0	0	0	0	2	0	3	0	2
3:21129424-21129735	AT3G57090,	2	+	0	0	1	0	0	0	0	3	0	0	0	0	0	1	3	0
3:21641906-21642148	AT3G58510,	1	+	0	0	0	0	0	2	2	1	0	0	0	0	0	3	0	0
3:21647126-21647375	AT3G58530,	2	+	0	0	0	0	1	2	0	4	0	0	0	0	0	1	0	0
3:21709706-21710195	AT3G58690,	2	+	0	1	1	0	0	0	0	1	0	0	0	1	0	2	0	2
4:6401421-6401722	AT4G10320,	2	-	0	0	0	0	1	0	0	0	0	1	0	1	0	3	2	0
4:6949564-6949785	AT4G11420,	1	-	0	0	0	0	0	0	4	0	0	0	0	0	0	1	3	0
4:7107467-7107642	AT4G11810,	1	+	0	0	3	1	0	0	0	0	0	0	0	0	0	2	1	1
4:7614768-7615142	AT4G13040,	2	+	0	0	1	1	0	1	2	0	0	0	0	0	0	1	1	1
4:9645158-9645663	AT4G17170,	2	-	0	0	0	1	0	1	2	0	0	0	1	0	0	2	1	0
4:11717805-11719164	AT4G22120,	5	-	1	0	0	0	2	2	1	0	0	0	0	0	0	2	0	0
4:14903841-14904034	AT4G30500,	1	+	0	1	0	0	0	0	0	1	0	1	0	0	0	3	2	0
4:15207665-15208176	AT4G31340,	3	+	0	0	0	0	0	0	3	3	0	0	0	0	0	1	0	1
4:15365896-15366252	AT4G31750,	2	-	0	0	0	1	0	0	1	1	0	0	0	0	0	2	3	0
4:18014170-18014796	AT4G38510,	4	-	0	1	0	1	1	0	0	3	0	1	0	0	0	1	0	0
5:185995-186186	AT5G01450,	1	-	0	0	0	1	0	0	0	4	0	0	0	0	0	1	2	0
5:3719533-3719783	AT5G11580,	1	+	1	1	2	0	1	0	1	0	0	0	1	0	0	1	0	0
5:3778321-3778967	AT5G11720,	1	+	0	3	0	0	0	0	1	2	0	0	0	1	0	1	0	0
5:4711262-4712191	AT5G14610,	3	+	0	0	0	0	1	1	0	0	0	2	0	0	0	2	0	2
5:5533856-5534295	AT5G16830,	2	-	0	1	0	0	0	1	0	4	0	0	0	0	0	2	0	0
5:5596907-5597353	AT5G17020,	3	+	0	1	0	0	0	1	1	1	0	0	1	2	0	1	0	0
5:6346428-6346999	AT5G19010,	3	-	0	0	0	1	1	0	1	1	0	0	2	0	0	2	0	0
5:6574973-6575352	AT5G19485,	3	-	0	0	3	0	0	1	0	0	1	0	2	0	0	1	0	0
5:7895284-7895810	AT5G23430,	2	-	0	0	0	0	1	0	3	3	0	0	0	0	0	1	0	0
5:9438901-9439157	AT5G26830,	2	+	0	0	0	0	2	0	1	3	0	0	0	0	0	2	0	0
5:10069918-10070477	AT5G28060,	3	-	0	3	0	1	0	0	0	0	0	0	0	0	0	1	2	1
5:13866560-13866829	AT5G35690,	2	-	0	0	1	2	0	0	1	0	0	1	0	0	0	2	0	1
5:13913573-13913932	AT5G35750,	2	-	0	2	0	1	1	0	0	1	0	0	0	2	0	1	0	0
5:19815301-19816283	AT5G48880,	6	-	1	3	0	1	0	0	0	0	0	0	0	0	0	1	0	2
5:23555156-23555312	AT5G58220,	1	-	0	0	2	0	2	0	1	0	0	0	2	0	0	1	0	0
5:26359491-26359734	AT5G65900,	2	+	0	0	0	0	0	5	0	0	0	0	0	0	0	3	0	0
5:26953005-26953370	AT5G67570,	2	+	1	0	1	0	0	1	1	3	0	0	0	0	0	1	0	0
Mt:40483-41982	n/a		-	0	0	1	1	1	0	2	2	0	0	0	0	0	1	0	0
1:127651-127935	AT1G01320,	2	-	0	2	1	0	0	2	2	0	0	0	0	0	0	0	1	0
1:1014951-1015304	AT1G03960,	2	+	0	0	0	2	0	0	0	2	0	0	0	0	0	0	3	1
1:2936832-2937441	AT1G09100,	3	-	0	0	0	1	1	2	2	0	0	0	0	0	0	0	2	0
1:5576753-5577258	AT1G16300,	3	+	0	0	0	0	0	0	5	0	0	0	1	1	0	0	1	0
1:6597340-6598610	AT1G19100,	4	+	0	0	1	0	0	0	1	3	0	0	0	0	0	0	1	2
1:20847864-20848247	AT1G55760,	2	-	0	0	0	0	0	0	3	3	0	0	0	0	0	0	2	0
1:25651099-25651339	AT1G68410,	2	-	0	0	0	0	0	0	1	3	0	0	0	0	0	0	4	0
1:26744476-26744945	AT1G70940,	2	+	0	1	0	0	0	1	3	2	0	0	0	0	0	0	1	0
1:29576557-29577113	AT1G78630,	2	+	0	1	0	2	0	0	1	0	0	0	1	0	0	0	3	0
1:29663049-29663705	AT1G78900,	3	+	1	4	0	1	0	0	0	0	0	0	0	0	0	0	2	0
1:29850487-29850908	AT1G79350,	2	-	0	1	0	0	0	0	1	2	0	0	0	2	0	0	2	0
1:30090025-30090979	AT1G79990,	5	+	0	1	0	0	1	1	0	1	0	0	0	0	0	0	2	2
1:30154540-30155102	AT1G80170,	3	-	1	0	0	0	0	1	0	2	1	0	0	2	0	0	1	0
1:30265760-30266294	AT1G80490,	2	-	0	0	0	0	0	3	2	1	0	0	0	0	0	0	2	0
2:7354907-7355456	AT2G16950,	2	+	1	2	0	0	0	2	1	0	0	0	0	0	0	0	2	0
2:8120624-8121255	AT2G18730,	4	+	0	0	0	0	0	0	3	1	0	0	2	0	0	0	2	0
2:11879240-11879959	AT2G27900,	4	+	1	0	0	0	0	0	1	1	0	0	2	0	0	0	3	0
2:14969232-14969494	AT2G35630,	2	+	0	1	0	0	0	1	3	1	0	0	0	0	0	0	2	0
2:15120480-15120854	AT2G36010,	3	+	0	2	0	0	0	1	0	2	0	0	0	0	0	0	2	1
2:15452471-15452792	AT2G36840,	1	-	0	0	0	0	2	0	2	0	0	0	0	1	0	0	1	2
2:17916308-17917267	AT2G43080,	4	+	0	0	1	0	0	2	0	1	0	0	1	1	0	0	2	0
[truncated: 13,257 more rows]

## Sheet: Suplementary Table 3 C
Supplementary Table 3 C. Summarized number of reads obtained in four biological replicates for R+ and R- libraries. The circRNAs validated by PCR are shown in blue; see Supplementary Figure 4.
			Total number of reads for all sample types		R+			Summarized nr of reads in organs/seedlig of R+	R-
circRNA_ID	gene_id	strand	R+	R-	seedling	root	leaf	flower	seedling	root	leaf	flower
2:18973735-18973879	AT2G09695,	+	0	15563	0	0	0	0	1590	7469	452	6052
Pt:979-1248	ATCG00020,	+	3	1865	0	0	0	3	1463	0	0	402
1:20310304-20310540	AT1G54410,	-	0	1379	0	0	0	0	46	191	1116	26
Pt:55928-144352	n/a	+	0	1162	0	0	0	0	709	0	104	349
2:18974209-18974352	AT2G09705,	+	32	998	1	16	0	15	176	500	24	298
3:10035109-10036431	n/a	-	503	759	39	183	1	280	56	209	0	494
5:1106879-1107381	AT5G04090,	-	3017	715	476	1132	513	896	73	274	138	230
2:4485015-4486252	n/a	+	2914	627	508	1162	856	388	73	307	170	77
1:11778554-11780741	n/a	+	158	620	19	84	4	51	98	304	30	188
1:3469693-3469837	AT1G10522,	+	0	553	0	0	0	0	142	136	0	275
3:22656402-22656547	AT3G61198,	-	0	494	0	0	0	0	51	250	0	193
2:18973915-18974055	AT2G09700,	+	0	490	0	0	0	0	0	134	0	356
4:4196362-4197112	AT4G07390,	+	1926	428	362	608	353	603	43	145	124	116
2:4485096-4486252	n/a	+	1760	359	227	795	576	162	29	197	102	31
1:11778554-11779629	n/a	+	132	318	20	73	1	38	40	159	32	87
Pt:1326-1501	n/a	+	0	301	0	0	0	0	147	0	154	0
4:15077028-15077410	AT4G30975,	+	1653	296	105	1455	70	23	7	284	3	2
3:16314559-16315697	n/a	+	46	293	0	43	0	3	15	209	4	65
Pt:1142-123669	n/a	-	0	286	0	0	0	0	0	0	286	0
1:12383203-12384469	n/a	-	1331	275	218	631	32	450	28	128	16	103
1:12381927-12382805	n/a	-	1176	253	255	368	55	498	36	94	12	111
1:12195268-12196524	AT1G33615,	-	330	210	72	139	35	84	31	97	35	47
1:29911240-29911379	AT1G09867,	-	1	183	1	0	0	0	30	86	0	67
Pt:601-738	ATCG00020,	-	0	180	0	0	0	0	164	0	0	16
1:12197021-12199193	n/a	-	108	177	9	92	0	7	9	138	5	25
1:12598733-12600110	AT1G34460,	+	43	172	5	23	0	15	14	84	21	53
1:17582831-17584833	n/a	+	27	167	1	24	0	2	17	86	3	61
3:5566863-5572941	n/a	+	65	163	20	40	4	1	136	0	2	25
5:7609707-7614434	n/a	+	4	163	1	3	0	0	22	86	17	38
Pt:55772-55942	ATCG00490,	+	6	155	1	0	3	2	111	1	0	43
1:12195268-12196544	AT1G33615,	-	179	150	11	155	3	10	4	140	2	4
5:5576809-5579580	n/a	-	9	140	5	0	4	0	134	6	0	0
3:16310118-16311208	n/a	+	154	128	13	91	7	43	6	81	5	36
2:4485020-4486252	n/a	+	562	123	89	261	157	55	18	72	25	8
5:7609577-7614434	n/a	+	4	116	1	1	0	2	22	43	10	41
1:3059807-3064874	n/a	+	1	113	0	1	0	0	10	18	57	28
1:7085326-7088687	n/a	-	0	108	0	0	0	0	0	21	23	64
5:21945393-21990774	n/a	-	0	102	0	0	0	0	0	0	0	102
1:26715933-26716400	AT1G70850,	-	0	101	0	0	0	0	0	101	0	0
1:382803-383130	AT1G02080,	+	670	98	124	245	137	164	12	44	15	27
1:12195268-12196344	AT1G33615,	-	248	98	114	37	28	69	23	19	29	27
2:2184672-2184820	AT2G04955,	-	0	92	0	0	0	0	15	26	0	51
3:2642135-2644091	n/a	+	3	92	0	1	0	2	3	41	41	7
1:12383203-12384363	n/a	-	566	90	98	253	54	161	14	41	8	27
4:9044498-9044699	AT4G15955,	-	515	90	110	113	171	121	7	37	37	9
1:1631579-1631842	AT1G05520,	-	55	90	2	37	1	15	5	38	23	24
5:14738507-14739306	AT5G37240,	-	34	88	8	11	0	15	5	29	5	49
1:30349032-30349237	AT1G80750,	+	253	85	53	81	31	88	11	34	15	25
1:12599082-12600110	AT1G34460,	+	34	85	2	24	2	6	4	51	3	27
1:29954420-29955106	AT1G79610,	-	340	84	43	136	50	111	6	39	12	27
3:17173528-17174520	n/a	-	59	83	5	42	2	10	6	59	8	10
4:5923655-5924099	AT4G09320,	+	1	82	1	0	0	0	6	48	0	28
Pt:934-11277	n/a	-	0	77	0	0	0	0	0	0	77	0
5:7584873-7594683	n/a	-	21	75	5	8	1	7	19	0	49	7
1:22359475-22363105	n/a	-	1	74	0	0	1	0	7	59	4	4
2:19672192-19672380	AT2G48100,	+	602	73	112	264	74	152	10	38	11	14
4:5059540-5060151	n/a	-	229	73	58	49	35	87	12	18	26	17
2:9786583-9798967	n/a	+	4	73	3	0	0	1	33	1	2	37
3:17169794-17170903	AT3G46614,	-	23	73	1	18	0	4	9	46	6	12
4:6884521-6887831	n/a	+	0	73	0	0	0	0	0	73	0	0
3:19094437-19095353	AT3G51460,	+	350	68	80	106	72	92	8	27	12	21
1:12598689-12600110	AT1G34460,	+	15	68	0	15	0	0	8	34	7	19
5:25182042-25184894	n/a	+	0	65	0	0	0	0	0	65	0	0
3:8391219-8391932	AT3G23430,	-	178	63	6	164	7	1	1	58	3	1
5:14738507-14739294	AT5G37240,	-	57	63	10	20	3	24	8	27	6	22
5:8350547-8352822	AT5G24450,	+	39	63	10	12	4	13	9	31	9	14
Pt:601-1269	ATCG00020,	-	0	63	0	0	0	0	40	0	23	0
3:10033829-10036431	n/a	-	34	62	1	9	0	24	10	13	0	39
4:16535960-16536097	AT4G34620,	-	0	62	0	0	0	0	30	5	9	18
2:12961640-12964647	n/a	-	0	62	0	0	0	0	12	0	50	0
Pt:55216-55411	ATCG00490,	-	0	59	0	0	0	0	54	0	5	0
3:11155468-11155611	AT3G29185,	-	311	58	84	22	86	119	4	10	21	23
Pt:55772-55976	ATCG00490,	+	3	57	3	0	0	0	57	0	0	0
2:15029955-15030107	AT2G35750,	+	0	56	0	0	0	0	11	31	0	14
4:5059540-5063374	n/a	-	3	55	0	0	0	3	6	27	10	12
2:13271934-13272117	AT2G31141,	-	1172	54	91	444	129	508	0	31	0	23
4:7887111-7887618	n/a	-	168	54	21	0	147	0	5	0	49	0
1:7558475-7560288	AT1G21580,	-	161	54	47	40	35	39	11	11	28	4
3:16310118-16311179	n/a	+	99	54	9	60	1	29	5	36	0	13
1:22582297-22584333	AT1G61240,	+	66	54	26	12	3	25	9	9	7	29
5:23157629-23159628	AT5G57160,	-	29	54	3	13	3	10	11	17	15	11
1:19522099-19522642	AT1G52410,	+	21	53	2	13	2	4	0	36	1	16
2:15029955-15030115	AT2G35750,	+	0	53	0	0	0	0	10	27	1	15
3:4819688-4822739	n/a	+	7	51	0	1	4	2	12	0	29	10
2:19063375-19067011	n/a	+	0	51	0	0	0	0	10	34	1	6
5:900654-901168	AT5G03560,	-	67	50	20	28	6	13	8	25	11	6
5:6761330-6763611	n/a	+	0	50	0	0	0	0	5	27	1	17
5:7951290-7951442	AT5G23580,	-	276	49	32	146	20	78	8	17	11	13
3:22942458-22942716	AT3G61960,	-	314	48	51	131	70	62	9	22	5	12
3:17445498-17445652	AT3G07725,	+	0	48	0	0	0	0	10	20	0	18
3:17953266-17954439	AT3G48470,	+	100	47	33	25	5	37	5	5	18	19
5:14739655-14741529	n/a	-	70	47	5	53	3	9	6	34	2	5
5:15377911-15381442	n/a	-	0	47	0	0	0	0	19	0	13	15
1:20066441-20074643	n/a	-	1	47	0	0	0	1	1	21	16	9
4:13798788-13800094	AT4G27640,	-	48	46	14	14	4	16	12	8	5	21
3:16310126-16311208	n/a	+	41	46	4	23	0	14	2	30	4	10
1:19522402-19522642	AT1G52410,	+	2	46	0	1	0	1	2	11	0	33
5:4002358-4014861	n/a	+	0	46	0	0	0	0	11	20	0	15
4:12480688-12481259	AT4G24020,	+	96	45	37	31	25	3	14	16	10	5
5:16882635-16889500	n/a	+	5	45	2	1	1	1	6	7	12	20
3:21722439-21725765	n/a	-	9	45	1	0	8	0	4	11	16	14
4:2719063-2719462	AT4G05320,	+	0	45	0	0	0	0	2	22	5	16
5:3005360-3015098	n/a	+	585	44	94	233	96	162	3	22	0	19
2:16613843-16615133	AT2G39810,	+	126	44	19	42	28	37	3	20	8	13
4:13026572-13027129	AT4G25500,	+	43	44	10	17	3	13	2	30	6	6
5:15904931-16053951	n/a	-	0	44	0	0	0	0	9	16	0	19
2:14533800-14534012	AT2G34480,	-	0	44	0	0	0	0	0	32	0	12
1:12383203-12384513	n/a	-	177	42	4	160	4	9	0	40	0	2
5:15517280-15521015	n/a	+	9	42	1	5	0	3	2	25	0	15
3:19094426-19095353	AT3G51460,	+	189	41	44	71	18	56	9	17	8	7
1:12381927-12384469	n/a	-	106	41	7	68	0	31	6	17	5	13
3:16309808-16311208	n/a	+	14	41	1	10	1	2	1	29	0	11
1:12598848-12600110	AT1G34460,	+	11	41	2	5	0	4	1	22	5	13
2:16614068-16615133	AT2G39810,	+	169	40	29	64	29	47	5	4	11	20
2:8659532-8660567	AT2G20060,	+	174	40	49	62	8	55	4	16	7	13
3:17171456-17172914	n/a	-	17	40	0	15	0	2	3	28	0	9
1:20068238-20081052	n/a	-	0	40	0	0	0	0	8	16	0	16
Pt:13357-13516	n/a	-	0	40	0	0	0	0	13	0	19	8
1:12195268-12199193	n/a	-	1	40	0	0	0	1	1	36	0	3
4:7887116-7887618	n/a	-	79	38	14	0	64	1	3	0	35	0
3:11289661-11291634	AT3G29390,	+	181	37	9	109	45	18	0	35	1	1
2:17138307-17138573	AT2G41100,	+	65	37	13	19	27	6	0	0	0	37
1:20295245-20296559	AT1G54370,	-	97	37	32	15	9	41	6	9	6	16
5:19624720-19624869	AT5G07105,	+	0	37	0	0	0	0	12	9	0	16
Pt:56072-56226	ATCG00490,	-	0	36	0	0	0	0	22	0	0	14
5:1808562-1808716	AT5G01135,	+	0	36	0	0	0	0	0	36	0	0
1:950404-951211	AT1G03780,	-	70	35	25	27	0	18	2	19	2	12
5:6753369-6757914	n/a	+	16	35	0	7	8	1	12	0	1	22
5:5583071-5585938	n/a	-	2	35	0	0	1	1	9	8	0	18
5:15663366-15684116	n/a	-	2	35	0	2	0	0	0	35	0	0
2:15910564-15910878	AT2G38020,	-	235	34	52	60	59	64	6	15	7	6
1:10498644-10499244	AT1G29965,AT1G29970,	-	54	34	8	30	0	16	6	17	5	6
1:7178470-7181069	n/a	+	0	34	0	0	0	0	0	0	15	19
2:11817644-11819254	n/a	+	0	34	0	0	0	0	0	18	0	16
1:28587466-28587612	AT1G76180,	-	0	34	0	0	0	0	0	22	0	12
5:26792958-26793181	AT5G67130,	+	251	33	46	92	35	78	0	18	4	11
2:17954032-17954231	AT2G43180,	-	191	33	31	101	38	21	1	21	6	5
1:16912770-16913095	AT1G44790,	-	220	33	38	97	24	61	2	15	1	15
2:17272368-17272938	AT2G41440,	+	163	33	26	41	21	75	3	8	5	17
5:2351207-2353808	n/a	+	0	33	0	0	0	0	0	0	0	33
3:2114623-2117602	n/a	-	0	33	0	0	0	0	10	7	3	13
1:28269963-28270233	AT1G75340,	-	0	33	0	0	0	0	8	18	3	4
4:6526748-6527634	AT4G10570,	-	127	32	14	55	22	36	5	15	2	10
1:12599575-12600110	AT1G34460,	+	63	32	5	39	4	15	0	21	3	8
5:7015574-7015794	AT5G20720,	+	0	32	0	0	0	0	9	0	3	20
3:16314569-16315697	n/a	+	6	32	0	5	0	1	0	26	0	6
3:5400792-5400993	AT3G15950,	-	1	32	0	1	0	0	17	15	0	0
Pt:55772-56098	ATCG00490,	+	0	32	0	0	0	0	30	0	2	0
1:24047787-24047963	AT1G64720,	-	218	31	86	16	49	67	7	2	18	4
4:6662514-6664511	n/a	+	66	31	14	20	3	29	5	17	1	8
2:5912593-5913797	AT2G14050,	+	33	31	9	4	5	15	10	9	9	3
1:17582831-17584817	n/a	+	7	31	0	7	0	0	2	21	0	8
Pt:32805-33020	ATCG00270,	+	0	31	0	0	0	0	17	0	3	11
2:17946205-17946444	AT2G43150,	-	0	31	0	0	0	0	0	31	0	0
2:699062-699656	AT2G02570,	-	119	30	24	38	17	40	6	12	6	6
5:15378136-15384895	n/a	-	15	30	15	0	0	0	5	0	8	17
3:17171472-17172914	n/a	-	22	30	0	20	0	2	2	24	1	3
1:24702386-24708882	n/a	-	0	30	0	0	0	0	0	30	0	0
5:6525092-6525754	AT5G19370,	-	140	29	34	60	17	29	3	17	2	7
5:16396098-16399921	AT5G40910,	+	0	29	0	0	0	0	6	15	3	5
3:4922906-4925556	n/a	+	0	29	0	0	0	0	29	0	0	0
4:8290830-8296962	n/a	+	0	29	0	0	0	0	1	0	28	0
4:15518699-15518883	AT4G32120,	-	207	28	30	93	32	52	0	19	2	7
5:15262271-15262561	AT5G38212,	-	95	28	7	57	11	20	2	18	6	2
5:15378136-15381717	n/a	-	8	28	8	0	0	0	0	0	11	17
1:4609493-4609728	AT1G13440,	+	2	28	0	2	0	0	4	14	0	10
4:2719291-2719462	AT4G05320,	+	0	28	0	0	0	0	10	4	5	9
Pt:41530-41739	ATCG00350,	+	1	28	1	0	0	0	19	0	5	4
3:23037241-23037428	AT3G62250,	+	0	28	0	0	0	0	14	0	11	3
1:7145691-7149015	n/a	+	0	28	0	0	0	0	0	16	10	2
5:15025579-15025974	n/a	+	86	27	16	42	0	28	5	13	0	9
1:12195268-12196367	AT1G33615,	-	63	27	30	14	7	12	9	6	6	6
1:29592906-29595435	n/a	+	0	27	0	0	0	0	6	0	6	15
3:5399469-5399671	AT3G15950,	-	2	27	0	2	0	0	20	7	0	0
Pt:9548-118402	n/a	-	0	27	0	0	0	0	27	0	0	0
1:3674466-3675958	AT1G11000,	-	43	26	8	5	0	30	4	3	0	19
5:14738507-14741529	n/a	-	20	26	2	14	1	3	1	23	0	2
1:30059410-30064157	n/a	-	5	26	3	2	0	0	4	9	6	7
1:5447607-5447745	AT1G15820,	-	1	26	1	0	0	0	13	0	3	10
1:27436200-27439930	n/a	+	0	26	0	0	0	0	6	6	3	11
5:21945393-21945575	AT5G54070,AT5G54075,	-	0	26	0	0	0	0	15	0	0	11
Pt:55952-56098	ATCG00490,	+	0	26	0	0	0	0	20	0	0	6
3:2070787-2075130	n/a	-	1	26	0	0	0	1	4	16	2	4
4:7124096-7131207	n/a	-	2	26	0	1	0	1	2	19	4	1
2:17138307-17138943	AT2G41100,	+	0	26	0	0	0	0	1	7	18	0
4:12553664-12553846	AT4G24190,	-	0	26	0	0	0	0	0	25	1	0
3:20514580-20514863	AT3G55330,	-	158	25	67	0	61	30	4	0	17	4
5:26389498-26390136	AT5G65970,	-	95	25	4	91	0	0	0	25	0	0
1:17237174-17237491	AT1G46480,	-	82	25	2	63	2	15	1	23	0	1
5:6180209-6180926	AT5G18590,	-	43	25	9	1	8	25	4	1	8	12
1:17714178-17714347	n/a	+	3	25	0	0	1	2	3	4	4	14
4:15100386-15100550	AT4G08425,	+	0	25	0	0	0	0	4	13	0	8
5:21990661-21990806	n/a	+	0	25	0	0	0	0	0	25	0	0
5:17620798-17621714	AT5G43822,	+	124	24	34	34	20	36	5	3	5	11
1:382373-383130	AT1G02080,	+	101	24	27	36	12	26	6	9	3	6
3:3172073-3172253	AT3G10260,	-	91	24	17	37	13	24	3	9	3	9
Pt:28218-28398	n/a	-	4	24	2	0	2	0	18	0	0	6
5:3556066-3570004	n/a	+	1	24	1	0	0	0	2	13	0	9
3:19661249-19661940	AT3G53020,	-	0	24	0	0	0	0	0	14	0	10
5:18663559-18663770	AT5G46020,	-	0	24	0	0	0	0	3	15	0	6
2:19003840-19005985	n/a	-	0	24	0	0	0	0	6	6	7	5
Pt:40799-40991	ATCG00350,	+	0	24	0	0	0	0	24	0	0	0
3:5195567-5195827	AT3G15380,	+	196	23	42	79	19	56	4	14	1	4
2:14529841-14530023	AT2G34460,	+	147	23	43	5	72	27	4	1	7	11
2:13563446-13563811	AT2G31902,	+	127	23	11	83	24	9	0	18	1	4
5:23072415-23072808	AT5G57015,	+	139	23	25	39	29	46	3	4	5	11
4:10957705-10958861	AT4G20300,	+	31	23	5	13	0	13	6	11	1	5
3:16311825-16314011	n/a	+	15	23	1	12	0	2	1	14	0	8
5:15517283-15521015	n/a	+	10	23	1	5	0	4	1	12	1	9
4:5389946-5405831	n/a	-	3	23	0	0	3	0	2	10	2	9
3:19661319-19661926	AT3G53020,	-	0	23	0	0	0	0	0	13	0	10
4:12553919-12554123	AT4G24190,	-	0	23	0	0	0	0	1	9	7	6
5:13831434-13831625	AT5G35630,	-	0	23	0	0	0	0	10	0	9	4
4:18027008-18027385	AT4G38550,	+	0	23	0	0	0	0	0	0	23	0
3:5399310-5399968	AT3G15950,	-	91	22	31	58	0	2	3	19	0	0
5:6569544-6569774	AT5G19473,	+	10	22	1	0	1	8	1	0	0	21
2:19004020-19006167	n/a	-	0	22	0	0	0	0	5	5	1	11
2:1800184-1824100	n/a	-	0	22	0	0	0	0	3	0	9	10
5:21814034-21814179	AT5G53740,	-	0	22	0	0	0	0	0	12	0	10
Pt:55106-56083	ATCG00490,	-	0	22	0	0	0	0	18	0	1	3
5:2823669-2827414	n/a	+	1	22	0	1	0	0	7	14	0	1
Pt:55106-55268	ATCG00490,	-	0	22	0	0	0	0	16	0	5	1
1:14160677-14160909	AT1G37130,	-	189	21	47	109	30	3	6	13	2	0
4:15267180-15267385	AT4G31480,	+	130	21	6	62	26	36	1	12	4	4
1:16797905-16798293	AT1G44170,	-	119	21	5	63	9	42	0	15	0	6
3:19594771-19595020	AT3G52870,	-	92	21	19	25	23	25	1	4	14	2
5:6598597-6599463	AT5G19550,	+	71	21	7	46	12	6	4	14	2	1
3:10963899-10965636	n/a	-	10	21	0	10	0	0	0	11	1	9
1:27148720-27148905	AT1G72150,	+	0	21	0	0	0	0	0	10	4	7
4:11182528-11182806	AT4G20890,	+	0	21	0	0	0	0	3	9	2	7
4:13594255-13594466	AT4G27090,	-	0	21	0	0	0	0	0	13	1	7
1:10335034-10335285	AT1G29560,	+	0	21	0	0	0	0	4	12	0	5
2:13139654-13139799	AT2G30860,	-	0	21	0	0	0	0	3	13	4	1
4:11780302-11805227	n/a	-	0	21	0	0	0	0	5	16	0	0
4:2442403-2446608	n/a	+	0	21	0	0	0	0	0	18	3	0
1:30373643-30373879	AT1G80830,	-	190	20	38	70	17	65	1	6	3	10
5:4653717-4653899	AT5G14430,	+	42	20	12	16	3	11	3	9	3	5
1:6891713-6893236	AT1G19860,	-	34	20	11	7	9	7	6	4	8	2
2:12592989-12597812	n/a	+	0	20	0	0	0	0	4	0	5	11
2:1282343-1282531	AT2G04030,	+	0	20	0	0	0	0	6	5	1	8
5:21945425-21990806	n/a	+	0	20	0	0	0	0	3	9	0	8
5:13710656-13710916	AT5G35530,	-	0	20	0	0	0	0	2	12	1	5
1:30090399-30090595	AT1G79990,	+	189	19	24	67	18	80	1	6	2	10
5:3074094-3074269	AT5G09870,	+	122	19	27	40	28	27	3	3	4	9
5:26092437-26092835	AT5G65290,	+	82	19	9	30	26	17	3	10	3	3
2:15502884-15503084	AT2G36910,	+	106	19	11	29	8	58	1	9	1	8
1:19523719-19524061	AT1G52410,	+	88	19	3	40	3	42	0	10	0	9
1:11875443-11875803	AT1G32790,	-	73	19	9	34	9	21	6	8	4	1
1:19522247-19522449	AT1G52410,	+	0	19	0	0	0	0	7	0	2	10
1:11332779-11333248	AT1G31660,	-	3	19	0	3	0	0	0	11	5	3
2:12994242-12994406	AT2G30490,	+	1	19	0	0	0	1	3	12	0	4
4:6478903-6479095	AT4G10480,	-	0	19	0	0	0	0	0	6	10	3
Pt:6637-41466	n/a	-	0	19	0	0	0	0	16	0	0	3
4:8689979-8698223	n/a	+	0	19	0	0	0	0	8	6	5	0
5:3555624-3568983	n/a	+	0	19	0	0	0	0	0	19	0	0
1:8335056-8335303	AT1G23480,	+	52	18	18	24	5	5	4	10	1	3
2:14530097-14530489	AT2G34460,	+	54	18	26	2	15	11	5	0	11	2
5:19348568-19349055	AT5G47780,	+	27	18	4	16	0	7	0	5	9	4
1:12195268-12196514	AT1G33615,	-	25	18	9	7	2	7	0	10	7	1
1:3469656-3469837	AT1G10522,	+	0	18	0	0	0	0	7	1	0	10
Pt:54901-55064	n/a	-	0	18	0	0	0	0	13	0	0	5
1:27148959-27149101	AT1G72150,	-	0	18	0	0	0	0	0	5	13	0
Pt:40918-41088	ATCG00350,	-	0	18	0	0	0	0	18	0	0	0
Pt:616-764	ATCG00020,	+	0	18	0	0	0	0	15	0	3	0
Pt:844-39840	n/a	-	0	18	0	0	0	0	18	0	0	0
1:17179610-17179940	AT1G45474,	+	170	17	72	0	38	60	7	0	2	8
1:12170651-12170856	AT1G33560,	+	105	17	16	50	21	18	2	9	2	4
4:18540249-18540526	AT4G39980,	+	87	17	16	55	9	7	0	13	1	3
1:19410583-19410908	AT1G52150,	-	90	17	21	40	16	13	1	9	2	5
1:5239295-5239650	AT1G15215,	+	93	17	12	43	16	22	2	9	2	4
1:20062464-20063011	AT1G53730,	+	88	17	16	47	7	18	5	7	1	4
1:17903957-17904292	AT1G48430,	-	76	17	11	13	30	22	1	4	7	5
2:13635786-13636332	AT2G32040,	+	20	17	7	4	2	7	3	9	1	4
3:16125802-16126427	AT3G44540,	+	10	17	0	10	0	0	0	14	0	3
5:693224-693414	AT5G02960,	-	0	17	0	0	0	0	3	7	0	7
5:21888310-21888507	AT5G53902,	+	0	17	0	0	0	0	0	11	0	6
3:3624026-3624206	AT3G11510,	-	0	17	0	0	0	0	2	10	0	5
5:5576995-5585679	n/a	-	0	17	0	0	0	0	10	2	0	5
1:7144829-7148060	n/a	+	0	17	0	0	0	0	0	8	6	3
Pt:51202-51472	ATCG00450,	+	0	17	0	0	0	0	12	2	0	3
3:17732972-17742518	n/a	+	0	17	0	0	0	0	3	9	3	2
1:28958745-28959371	AT1G77080,	+	157	16	45	29	15	68	2	4	3	7
1:11875443-11875789	AT1G32790,	-	101	16	12	54	7	28	3	12	0	1
2:10321651-10321821	AT2G24260,	-	66	16	3	60	2	1	3	12	0	1
4:15969248-15969651	AT4G33090,	-	48	16	12	14	10	12	5	5	1	5
1:30349032-30349921	AT1G80750,	+	40	16	14	12	2	12	0	4	7	5
5:17580616-17580848	AT5G43750,	-	43	16	9	2	13	19	0	0	14	2
Pt:55949-56098	ATCG00490,	+	0	16	0	0	0	0	0	0	0	16
4:18234801-18235749	AT4G39150,	-	13	16	2	6	1	4	3	9	0	4
4:6698520-6698847	AT4G10920,	-	0	16	0	0	0	0	3	6	0	7
3:22525897-22598919	n/a	+	0	16	0	0	0	0	0	10	0	6
Pt:55794-55954	ATCG00490,	+	0	16	0	0	0	0	12	0	0	4
2:18026359-18029348	AT2G43410,	-	0	16	0	0	0	0	4	9	0	3
3:3490276-3490475	AT3G11130,	-	0	16	0	0	0	0	1	11	1	3
5:5210223-5212022	n/a	+	0	16	0	0	0	0	3	0	10	3
Pt:55094-56071	ATCG00490,	-	0	16	0	0	0	0	7	0	7	2
3:5400193-5400702	AT3G15950,	-	0	16	0	0	0	0	0	16	0	0
2:17224556-17224704	AT2G41310,AT2G09250,	+	180	15	0	0	123	57	0	0	0	15
3:9495096-9495354	AT3G25940,	+	121	15	23	64	12	22	0	10	3	2
3:5544384-5544758	AT3G16340,	+	74	15	3	66	1	4	0	14	0	1
1:2206339-2206518	AT1G07180,	+	73	15	26	0	36	11	6	0	9	0
3:17447395-17447783	AT3G47350,	+	82	15	12	22	12	36	0	7	0	8
1:29861644-29861927	AT1G79380,	+	30	15	11	8	8	3	4	6	4	1
1:12381927-12384363	n/a	-	28	15	2	15	3	8	3	4	1	7
1:9067152-9069092	AT1G26208,	-	15	15	0	5	10	0	0	15	0	0
3:10033829-10034530	n/a	-	9	15	0	4	0	5	1	3	0	11
5:25181869-25184894	n/a	+	0	15	0	0	0	0	0	0	0	15
1:27847591-27850188	n/a	-	0	15	0	0	0	0	4	0	0	11
1:22338467-22338683	AT1G60640,	-	0	15	0	0	0	0	2	0	4	9
1:28587466-28587600	AT1G76180,	-	0	15	0	0	0	0	0	8	0	7
3:11192569-11192707	AT3G29240,	+	0	15	0	0	0	0	4	4	1	6
1:19524145-19524326	AT1G52410,	+	2	15	1	0	0	1	0	10	1	4
4:14203032-14203225	AT4G28750,	-	0	15	0	0	0	0	3	0	7	5
1:22665289-22705416	n/a	-	0	15	0	0	0	0	3	2	7	3
3:5400946-5401145	AT3G15950,	-	2	15	0	2	0	0	13	2	0	0
5:21811769-21811914	AT5G53740,	-	0	15	0	0	0	0	14	0	0	1
1:5606911-5610218	n/a	+	0	15	0	0	0	0	1	0	14	0
2:13139603-13141768	n/a	+	0	15	0	0	0	0	0	13	2	0
3:10960286-10968617	n/a	-	0	15	0	0	0	0	0	15	0	0
3:4820191-4823247	n/a	+	0	15	0	0	0	0	10	0	5	0
3:5400054-5400558	AT3G15950,	-	0	15	0	0	0	0	2	13	0	0
4:17803487-17803640	AT4G37870,	-	0	15	0	0	0	0	0	15	0	0
1:8323451-8324050	AT1G23440,	+	114	14	20	58	23	13	0	11	2	1
2:7244815-7245074	AT2G16700,	+	101	14	3	76	15	7	2	12	0	0
3:4283022-4283777	n/a	+	111	14	25	33	21	32	4	5	4	1
1:10832906-10833429	AT1G30580,	-	86	14	18	37	15	16	4	6	1	3
5:18424994-18426001	AT5G45472,	+	79	14	21	8	31	19	5	0	2	7
4:16311056-16311280	AT4G34050,	+	69	14	3	49	14	3	0	12	2	0
1:24048040-24048196	AT1G64720,	-	72	14	31	7	23	11	4	1	5	4
5:15023284-15023598	AT5G37793,	+	45	14	14	28	0	3	1	7	1	5
2:19600137-19601439	AT2G47860,	+	48	14	3	40	0	5	0	14	0	0
1:17126777-17127488	AT1G45201,	+	34	14	8	19	7	0	3	9	2	0
4:4977-5588	AT4G00020,	-	14	14	5	3	3	3	0	3	8	3
1:12012137-12024022	n/a	+	0	14	0	0	0	0	0	0	0	14
5:21945393-21945589	AT5G54070,AT5G54075,	-	0	14	0	0	0	0	4	0	0	10
5:21811769-21811951	AT5G53740,	-	0	14	0	0	0	0	2	3	0	9
1:11778554-11780227	n/a	+	1	14	0	1	0	0	4	2	2	6
4:2634783-2653070	n/a	-	0	14	0	0	0	0	2	5	0	7
1:19522712-19522926	AT1G52410,	+	0	14	0	0	0	0	0	6	2	6
1:20310394-20310540	AT1G54410,	-	0	14	0	0	0	0	0	0	9	5
Pt:39983-40124	ATCG00350,	-	0	14	0	0	0	0	8	1	0	5
1:3443417-3443609	AT1G10470,	-	0	14	0	0	0	0	2	7	2	3
4:15642295-15642463	AT4G32410,	-	0	14	0	0	0	0	4	8	0	2
5:7608197-7614434	n/a	+	0	14	0	0	0	0	1	8	3	2
3:1621814-1622008	AT3G05590,	+	3	14	0	1	0	2	3	11	0	0
1:19522712-19523501	AT1G52410,	+	0	14	0	0	0	0	0	14	0	0
4:9186653-9188212	n/a	+	0	14	0	0	0	0	0	14	0	0
5:25183347-25186373	n/a	+	0	14	0	0	0	0	0	14	0	0
1:14160668-14160909	AT1G37130,	-	150	13	34	81	34	1	0	12	1	0
4:14961224-14961558	AT4G30690,	+	123	13	37	20	33	33	4	0	7	2
5:23231371-23231552	AT5G57350,	-	90	13	12	26	50	2	0	6	4	3
5:22038648-22038809	AT5G54270,	+	96	13	41	0	42	13	6	0	6	1
5:18770049-18770268	AT5G46280,	-	109	13	19	40	6	44	1	8	1	3
3:23412447-23413001	AT3G63400,	+	84	13	29	28	7	20	1	7	2	3
5:252762-252968	AT5G01670,	+	78	13	11	40	13	14	1	10	0	2
1:18067174-18067619	AT1G48850,	-	63	13	11	43	5	4	1	8	1	3
1:9670307-9670619	AT1G27760,	+	71	13	13	27	19	12	2	9	2	0
1:24047621-24047963	AT1G64720,	-	78	13	27	3	21	27	3	0	4	6
3:16805926-16806440	AT3G45770,	-	68	13	12	33	10	13	1	9	2	1
3:2841474-2841896	AT3G09260,	-	40	13	4	36	0	0	0	13	0	0
5:23072415-23072662	AT5G57015,	+	61	13	9	12	16	24	2	5	4	2
4:6664265-6664511	n/a	+	64	13	11	21	2	30	1	7	1	4
1:5414136-5414282	AT1G15740,	+	34	13	9	20	3	2	2	5	5	1
2:206522-206831	AT2G01460,	+	43	13	10	13	5	15	1	8	2	2
3:21929798-21931203	AT3G59340,	-	27	13	6	21	0	0	3	10	0	0
1:23457451-23457750	AT1G63240,	-	47	13	6	9	3	29	0	2	4	7
5:15023284-15025974	n/a	+	18	13	0	8	2	8	1	8	1	3
5:21814034-21945538	n/a	-	0	13	0	0	0	0	0	0	0	13
5:21888361-21990806	n/a	+	0	13	0	0	0	0	0	0	0	13
1:12197021-12199173	n/a	-	6	13	1	5	0	0	2	7	0	4
3:5399469-5399968	AT3G15950,	-	9	13	4	5	0	0	1	12	0	0
5:24297668-24300283	AT5G60410,	+	8	13	3	2	2	1	0	3	8	2
2:19193448-19194652	AT2G46710,	+	7	13	2	3	1	1	2	7	3	1
1:12196286-12198853	n/a	-	6	13	3	3	0	0	1	4	7	1
1:10498524-10499244	AT1G29965,AT1G29970,	-	4	13	0	3	0	1	1	8	0	4
3:17168045-17169296	n/a	-	11	13	0	6	0	5	0	12	1	0
4:6409264-6409398	AT4G10340,	+	1	13	1	0	0	0	2	0	6	5
1:626807-626983	AT1G02840,	+	2	13	0	2	0	0	0	10	0	3
1:19522858-19523642	AT1G52410,	+	0	13	0	0	0	0	0	9	0	4
3:4818903-4821940	n/a	+	0	13	0	0	0	0	9	0	0	4
5:5210433-5212560	n/a	+	0	13	0	0	0	0	0	1	8	4
1:27541297-27541842	AT1G73230,	-	0	13	0	0	0	0	5	5	0	3
5:7609581-7614434	n/a	+	0	13	0	0	0	0	3	8	0	2
3:2841988-2842190	AT3G09260,	-	1	13	0	1	0	0	2	11	0	0
1:296495-296700	AT1G01820,	-	0	13	0	0	0	0	3	9	0	1
1:19523310-19523501	AT1G52410,	+	0	13	0	0	0	0	0	13	0	0
5:25053391-25053540	AT5G62390,	-	0	13	0	0	0	0	0	10	3	0
Pt:34381-103870	n/a	+	0	13	0	0	0	0	13	0	0	0
Pt:34384-55288	n/a	+	0	13	0	0	0	0	0	0	13	0
Pt:419-556	ATCG00020,	+	164	12	42	0	112	10	6	0	6	0
5:10070156-10070477	AT5G28060,	-	190	12	34	65	36	55	1	6	1	4
1:11627720-11628041	AT1G32240,	-	79	12	7	49	17	6	1	7	2	2
4:5239826-5240072	AT4G08290,	+	75	12	3	39	23	10	0	8	3	1
1:19992256-19992794	AT1G53580,	-	58	12	8	38	9	3	1	9	0	2
3:18285489-18285704	AT3G49310,	-	69	12	16	19	13	21	3	2	0	7
5:14892940-14893314	AT5G37500,	-	55	12	2	47	6	0	0	12	0	0
1:2707424-2707921	AT1G08550,	+	66	12	28	2	21	15	4	1	6	1
1:13538090-13538278	AT1G36160,	+	73	12	17	22	5	29	2	4	0	6
1:1872226-1872888	AT1G06150,	-	55	12	16	29	4	6	2	6	3	1
3:14230899-14232267	AT3G42050,	-	57	12	10	20	13	14	5	2	3	2
2:15502495-15502810	AT2G36910,	+	82	12	6	31	5	40	3	3	4	2
1:30312632-30313101	AT1G80640,	+	55	12	29	9	4	13	9	1	1	1
1:12381927-12382809	n/a	-	70	12	14	21	0	35	5	2	0	5
1:27296263-27296800	AT1G72500,	-	37	12	9	20	2	6	3	6	0	3
3:5399180-5399968	AT3G15950,	-	22	12	6	16	0	0	6	6	0	0
5:4865208-4865576	AT5G15020,	-	22	12	4	4	8	6	2	4	3	3
3:4523171-4523682	AT3G13772,	-	14	12	1	9	1	3	1	8	1	2
1:28512920-28513137	AT1G75940,	+	33	12	0	0	0	33	0	0	0	12
3:2591797-2592049	AT3G08530,	-	1	12	0	1	0	0	3	3	0	6
2:16880745-16881712	AT2G40430,	-	0	12	0	0	0	0	1	4	0	7
2:9107601-9108044	AT2G21270,	+	0	12	0	0	0	0	2	3	0	7
Pt:73557-73715	ATCG00680,	+	2	12	1	0	0	1	2	0	5	5
3:5399770-5399968	AT3G15950,	-	5	12	2	3	0	0	5	7	0	0
1:28587244-28587465	AT1G76180,	-	0	12	0	0	0	0	1	5	1	5
2:9782846-9789591	n/a	+	0	12	0	0	0	0	0	0	8	4
3:8727548-8727758	AT3G24160,	-	0	12	0	0	0	0	1	5	2	4
1:19523871-19524061	AT1G52410,	+	9	12	0	1	2	6	0	10	2	0
5:15517297-15521015	n/a	+	2	12	0	1	0	1	0	10	0	2
1:5447607-5447747	AT1G15820,	-	0	12	0	0	0	0	4	0	5	3
2:18347479-18355164	n/a	+	0	12	0	0	0	0	0	10	0	2
5:15004867-15005005	AT5G37780,	+	0	12	0	0	0	0	1	5	4	2
3:9404579-9407209	n/a	+	1	12	0	0	1	0	2	0	10	0
5:16185356-16185668	AT5G40450,	-	1	12	0	1	0	0	0	5	7	0
5:2824570-2828153	n/a	+	0	12	0	0	0	0	6	5	0	1
4:14648755-14649315	AT4G29940,	-	0	12	0	0	0	0	0	12	0	0
5:16366553-16366753	AT5G40850,	+	0	12	0	0	0	0	7	3	2	0
Pt:55094-55344	ATCG00490,	-	0	12	0	0	0	0	12	0	0	0
Pt:601-13395	n/a	-	0	12	0	0	0	0	0	0	12	0
2:2230283-2230610	AT2G05830,	+	78	11	16	32	16	14	0	1	7	3
4:14961208-14961558	AT4G30690,	+	103	11	29	11	21	42	3	1	3	4
5:2522594-2523409	AT5G07910,	-	74	11	14	33	14	13	0	8	0	3
5:1678373-1678595	AT5G05610,	-	84	11	15	23	22	24	5	3	1	2
3:3339812-3340668	AT3G10690,	-	75	11	22	28	6	19	6	2	1	2
1:24490431-24491017	AT1G65840,	+	54	11	10	26	15	3	0	10	1	0
2:13182778-13183082	AT2G30980,	-	52	11	12	26	10	4	4	4	2	1
1:29955203-29956360	AT1G79610,	-	57	11	8	20	8	21	0	7	3	1
5:3632738-3633022	AT5G11380,	+	56	11	17	13	6	20	4	5	1	1
2:9581871-9582430	AT2G22540,	+	31	11	10	13	8	0	0	6	4	1
2:6369536-6370009	AT2G14835,	+	35	11	9	10	7	9	3	3	1	4
1:3347021-3347437	AT1G10200,	-	41	11	6	17	1	17	0	7	1	3
4:13077475-13077713	AT4G25640,	-	32	11	12	3	7	10	4	2	2	3
3:18166956-18168061	AT3G49010,	-	33	11	11	7	0	15	2	2	2	5
5:7962537-7963227	AT5G23630,	-	24	11	2	10	4	8	0	7	2	2
2:11413187-11414082	AT2G26780,	+	18	11	7	7	2	2	1	2	7	1
3:22900266-22901255	AT3G61860,	-	15	11	4	7	1	3	0	6	1	4
4:9489372-9490811	AT4G16860,	-	9	11	3	0	5	1	2	0	5	4
4:1318913-1476561	n/a	+	0	11	0	0	0	0	0	0	0	11
1:20076661-20076975	AT1G53780,	-	13	11	4	1	3	5	2	6	1	2
5:14738507-14739714	n/a	-	10	11	3	7	0	0	1	10	0	0
3:1528910-1530256	AT3G05350,	-	10	11	3	3	1	3	6	0	4	1
1:19521945-19522146	AT1G52410,	+	2	11	0	2	0	0	3	0	2	6
1:11779374-11780741	n/a	+	7	11	0	7	0	0	0	10	1	0
1:20067812-20080883	n/a	-	3	11	0	3	0	0	0	7	0	4
2:15170708-15170896	AT2G36160,	+	1	11	1	0	0	0	0	5	0	6
2:17709677-17711466	n/a	-	0	11	0	0	0	0	0	0	4	7
4:9516075-9537015	n/a	-	0	11	0	0	0	0	1	4	2	4
5:21888361-21888507	AT5G53902,	+	0	11	0	0	0	0	2	1	4	4
2:7547857-7548014	AT2G17360,	+	0	11	0	0	0	0	3	5	0	3
3:8954439-8962170	n/a	+	0	11	0	0	0	0	2	6	0	3
5:21990610-21990806	n/a	+	0	11	0	0	0	0	3	5	0	3
Pt:116294-116482	ATCG01050,	+	0	11	0	0	0	0	8	0	0	3
5:26274150-26275236	AT5G65685,	-	2	11	0	0	0	2	1	8	0	2
2:10514282-10514780	AT2G24700,	-	0	11	0	0	0	0	0	9	0	2
2:18625155-18625349	AT2G45170,	+	0	11	0	0	0	0	1	2	6	2
Pt:739-944	ATCG00020,	-	1	11	1	0	0	0	9	0	2	0
2:13174757-13174947	AT2G30950,	+	0	11	0	0	0	0	3	0	7	1
2:17138674-17138943	AT2G41100,	+	1	11	0	0	0	1	4	4	3	0
1:7178290-7180754	n/a	+	0	11	0	0	0	0	6	5	0	0
3:5399903-5400101	AT3G15950,	-	0	11	0	0	0	0	4	7	0	0
3:5401080-5401293	AT3G15950,	-	0	11	0	0	0	0	11	0	0	0
4:6662514-6665710	n/a	+	0	11	0	0	0	0	0	9	2	0
Pt:54965-55105	ATCG00490,	-	0	11	0	0	0	0	11	0	0	0
5:1134326-1134820	AT5G04140,	+	97	10	37	1	53	6	5	0	3	2
3:3339812-3340050	AT3G10690,	-	135	10	17	50	13	55	2	5	0	3
1:2828380-2828581	AT1G08830,	+	65	10	4	47	6	8	1	6	0	3
1:30059886-30064646	n/a	-	63	10	15	17	17	14	0	0	10	0
1:7879089-7880684	AT1G22300,	-	42	10	8	20	9	5	1	7	0	2
3:3172328-3172512	AT3G10260,	-	56	10	13	13	8	22	2	3	2	3
1:20290944-20291230	AT1G54360,	+	58	10	8	22	5	23	2	7	0	1
4:12657713-12657875	AT4G24490,	-	51	10	12	17	5	17	0	2	7	1
1:9407668-9408594	AT1G27100,	-	35	10	0	21	13	1	0	9	0	1
2:17699176-17700174	AT2G42500,	-	42	10	15	12	2	13	2	2	1	5
1:10075360-10075858	AT1G28670,	-	37	10	22	0	10	5	6	0	2	2
3:17302215-17302478	AT3G46970,	-	33	10	11	0	16	6	1	0	5	4
3:5543983-5544315	AT3G16340,	+	30	10	0	27	2	1	0	9	1	0
5:2152648-2152906	AT5G06950,	+	34	10	5	9	11	9	1	5	1	3
3:523386-524409	AT3G02510,	-	30	10	4	12	10	4	1	6	1	2
5:6022253-6022516	AT5G18230,	-	51	10	6	5	12	28	2	6	0	2
2:18525731-18526165	AT2G44920,	+	26	10	12	0	8	6	2	0	7	1
2:10778489-10779159	AT2G25310,	-	18	10	6	4	0	8	0	2	3	5
1:12381927-12384513	n/a	-	13	10	1	12	0	0	0	10	0	0
1:949734-951211	AT1G03780,	-	13	10	3	4	0	6	0	4	0	6
3:17173557-17174520	n/a	-	10	10	2	6	0	2	0	4	2	4
3:6466323-6468779	n/a	-	8	10	0	8	0	0	0	6	1	3
4:9206960-9211511	AT4G16280,	-	3	10	1	1	0	1	0	1	0	9
2:9216698-9217120	AT2G21520,	+	13	10	2	5	2	4	1	5	4	0
3:17169794-17170605	AT3G46614,	-	9	10	0	7	2	0	2	7	1	0
5:22430550-22430718	AT5G55310,	-	9	10	2	1	3	3	0	7	0	3
3:4876254-4881913	n/a	-	0	10	0	0	0	0	0	1	0	9
Pt:33684-33899	n/a	+	6	10	0	2	2	2	6	0	0	4
5:6021766-6022181	AT5G18230,	-	12	10	3	2	0	7	2	4	2	2
5:16883549-16890470	n/a	+	0	10	0	0	0	0	0	2	1	7
3:21207219-21207397	AT3G57300,	+	2	10	0	0	0	2	0	4	0	6
5:26274150-26275514	AT5G65685,	-	4	10	1	3	0	0	1	8	0	1
1:3016098-3016334	AT1G09340,	+	0	10	0	0	0	0	6	0	1	3
3:2064711-2071634	n/a	-	1	10	0	0	0	1	1	0	7	2
1:10888620-10888856	AT1G30690,	+	0	10	0	0	0	0	0	8	0	2
Pt:55655-55921	ATCG00490,	+	0	10	0	0	0	0	7	0	1	2
5:8034596-8036561	n/a	+	1	10	0	1	0	0	0	10	0	0
Pt:54864-119676	n/a	+	0	10	0	0	0	0	7	0	2	1
3:5400655-5400854	AT3G15950,	-	0	10	0	0	0	0	0	10	0	0
4:16429097-16429286	AT4G34350,	+	0	10	0	0	0	0	0	5	5	0
4:7843254-7843449	AT4G13495,	+	0	10	0	0	0	0	8	0	2	0
5:20717696-20717855	AT5G50920,	-	0	10	0	0	0	0	0	0	10	0
5:22218486-22218648	AT5G54680,	+	117	9	17	42	33	25	2	5	1	1
Pt:1114-1325	ATCG00020,	+	81	9	46	0	30	5	0	0	2	7
2:19278343-19278607	AT2G46920,	-	78	9	10	58	5	5	1	8	0	0
5:24296902-24297456	AT5G60410,	+	71	9	14	24	20	13	1	3	2	3
1:20413944-20414198	AT1G54680,	+	71	9	7	31	19	14	1	5	1	2
4:37274-37567	AT4G00100,	+	64	9	24	21	5	14	0	2	1	6
3:17154449-17154741	AT3G46590,	+	73	9	13	23	14	23	0	4	2	3
2:2925886-2926336	AT2G07050,	+	53	9	12	25	10	6	2	4	2	1
3:18167710-18168061	AT3G49010,	-	57	9	11	28	7	11	3	5	0	1
1:21091768-21091960	AT1G56340,	-	47	9	7	27	9	4	0	5	0	4
2:558254-558659	AT2G02170,	-	61	9	10	17	16	18	0	2	4	3
1:2678103-2678754	AT1G08465,	+	58	9	18	0	19	21	2	0	4	3
3:6822490-6822721	AT3G19640,	+	47	9	3	31	2	11	3	6	0	0
3:7609637-7610205	AT3G21610,	-	43	9	6	24	5	8	1	6	1	1
4:478156-478319	AT4G01100,	+	50	9	12	16	6	16	0	3	5	1
[truncated: 54,310 more rows]

## Sheet: Suplementary Table 4
Supplementary Table 4. Abundance of circRNAs in seedlings and plant organs determined by ddPCR and RNA-seq using the following types of data normalization: (i) by library size, (ii) by the total number of back-spliced reads in the library, (iii) by the library size without rRNA and chloroplast RNA reads, (iv) by the total number of back-spliced reads without rRNA and chloroplast reads, (v) by the…
[truncated: 67 more rows]
[truncated: 8 more columns]

[truncated: 2 more sheets: Supplementary Table 5, Suplementary Table 6 A, B]
